# Supplementary material for: Estimation of fibrosis progression rates for chronic hepatitis C: a systematic review and meta-analysis update
Source: PubMed Central journal article supplement — BMJ Open. 2019 Nov 11;9(11):e027491. doi: 10.1136/bmjopen-2018-027491 (PMC6858137; doi:10.1136/bmjopen-2018-027491), 2019-11-11
Supplement: bmjopen-2018-027491.draft_revisions.pdf [file bmjopen-2018-027491.draft_revisions.pdf]

# BMJ Open

BMJ Open is committed to open peer review. As part of this commitment we make the peer review history of every article we publish publicly available.

When an article is published we post the peer reviewers' comments and the authors' responses online. We also post the versions of the paper that were used during peer review. These are the versions that the peer review comments apply to.

The versions of the paper that follow are the versions that were submitted during the peer review process. They are not the versions of record or the final published versions. They should not be cited or distributed as the published version of this manuscript.

BMJ Open is an open access journal and the full, final, typeset and author-corrected version of record of the manuscript is available on our site with no access controls, subscription charges or pay-per-view fees (<http://bmjopen.bmj.com>).

If you have any questions on BMJ Open's open peer review process please email [info.bmjopen@bmj.com](mailto:info.bmjopen@bmj.com)

# BMJ Open

## Estimation of fibrosis progression rates for chronic hepatitis C: a systematic review and meta-analysis update

|                               |                                                                                                                                                                                                                                                                                                                                                                                                                                                                                                                                                                                                                                                                                                                                                                                                                                                                                                                                 |
|-------------------------------|---------------------------------------------------------------------------------------------------------------------------------------------------------------------------------------------------------------------------------------------------------------------------------------------------------------------------------------------------------------------------------------------------------------------------------------------------------------------------------------------------------------------------------------------------------------------------------------------------------------------------------------------------------------------------------------------------------------------------------------------------------------------------------------------------------------------------------------------------------------------------------------------------------------------------------|
| Journal:                      | <i>BMJ Open</i>                                                                                                                                                                                                                                                                                                                                                                                                                                                                                                                                                                                                                                                                                                                                                                                                                                                                                                                 |
| Manuscript ID                 | bmjopen-2018-027491                                                                                                                                                                                                                                                                                                                                                                                                                                                                                                                                                                                                                                                                                                                                                                                                                                                                                                             |
| Article Type:                 | Research                                                                                                                                                                                                                                                                                                                                                                                                                                                                                                                                                                                                                                                                                                                                                                                                                                                                                                                        |
| Date Submitted by the Author: | 25-Oct-2018                                                                                                                                                                                                                                                                                                                                                                                                                                                                                                                                                                                                                                                                                                                                                                                                                                                                                                                     |
| Complete List of Authors:     | Erman, Aysegul; University of Toronto, Toronto Health Economics and Health Technology Assessment (THETA) Collaborative ; University of Toronto Leslie Dan Faculty of Pharmacy,<br>Krahn, Murray; University of Toronto, Toronto Health Economics and Health Technology Assessment (THETA) Collaborative ; University of Toronto Leslie Dan Faculty of Pharmacy,<br>Hansen, Tawnya; University of Toronto<br>Wong, Josephine; University of Toronto, Toronto Health Economics and Health Technology Assessment (THETA) Collaborative<br>Bielecki, Joanna; University of Toronto, Toronto Health Economics and Health Technology Assessment (THETA) Collaborative<br>Feld, Jordan; University Health Network<br>Wong, William; University of Waterloo School of Pharmacy<br>Grootendorst, Paul; University of Toronto Leslie Dan Faculty of Pharmacy,<br>Thein, Hla-Hla; University of Toronto Dalla Lana School of Public Health |
| Keywords:                     | fibrosis, cirrhosis, hepatitis C, transition probabilities, prognosis, natural history                                                                                                                                                                                                                                                                                                                                                                                                                                                                                                                                                                                                                                                                                                                                                                                                                                          |
|                               |                                                                                                                                                                                                                                                                                                                                                                                                                                                                                                                                                                                                                                                                                                                                                                                                                                                                                                                                 |

SCHOLARONE™  
Manuscripts

# Estimation of fibrosis progression rates for chronic hepatitis C: a systematic review and meta-analysis update

Aysegul Erman<sup>\*1,2</sup>, Murray D. Krahn<sup>1,2,3,4</sup>, Tawnya Hansen<sup>3</sup>, Josephine Wong<sup>2</sup>, Joanna M. Bielecki<sup>2</sup>, Jordan J. Feld<sup>5</sup>, William W. L. Wong<sup>2,6</sup>, Paul Grootendorst<sup>1</sup>, Hla-Hla Thein<sup>7</sup>.

## Author affiliations:

1. Leslie Dan Faculty of Pharmacy, University of Toronto, Toronto, ON, Canada
2. Toronto Health Economics and Technology Assessment Collaborative (THETA), University of Toronto, Toronto, ON, Canada
3. Department of Medicine, University Health Network, Toronto, ON, Canada
4. Institute of Health Policy, Management, and Evaluation, University of Toronto, Toronto, ON, Canada
5. Toronto Centre for Liver Disease, Sandra Rotman Centre for Global Health, University of Toronto, Toronto, ON, Canada
6. School of Pharmacy, University of Waterloo, Kitchener, ON, Canada
7. Dalla Lana School of Public Health, University of Toronto, Toronto, ON, Canada

**Short title:** Estimation of chronic hepatitis C prognosis

**Key words:** hepatic fibrosis, cirrhosis, hepatitis C, viral hepatitis

**Word count:** 3,551 / 4,000

**Tables and Figures:** 3 Tables and 2 Figures / 5

**Supplementary Tables and Figures:** 8 Tables and 1 Figure

**References:** 39

**\*Corresponding Author:** Aysegul Erman

Address: Toronto Health Economics and Technology Assessment (THETA) Collaborative  
University Health Network  
Toronto General Hospital  
Eaton Building, 10th Floor, Room 248  
200 Elizabeth Street, Toronto, ON M5G 2C4  
e-mail: [aysegul.erman@mail.utoronto.ca](mailto:aysegul.erman@mail.utoronto.ca)

**Author Contributions:** A. Erman conducted the study, collected, analysed and drafted the manuscript. Dr. Krahn and Dr. Thein contributed to the study design, as well as the analysis and interpretation of the results and the drafting of the manuscript. Dr. Feld, Dr. Wong and Dr. Grootendorst contributed to the analysis and interpretation of the results and the drafting of the manuscript. Drs. T. Hansen and J. Wong contributed to data collection and J. Bielecki is a medical librarian who helped to develop and conduct the systematic literature search. All authors contributed in the revision of the manuscript and gave final approval for the version to be published.

**Conflict of Interest:** Dr. Feld has received research support from Abbvie, Gilead Sciences, Janssen and Merck, Abbot and Regulus and consulting fees from Abbvie, Gilead Sciences, Janssen and Merck.

**Sources of Support:** A. Erman has received a doctoral fellowship from the Canadian Network on Hepatitis C (CanHepC). CanHepC is funded by a joint initiative of the Canadian Institutes of Health Research (CIHR) (NHC-142832) and the Public Health Agency of Canada (PHAC). M. Krahn was supported by the F. Norman Hughes Chair in Pharmacoeconomics.

**Data sharing:** All data is provided in the supplement.

**Patient and public involvement:** Patient and public were not involved as this is systematic review of published literature.

## Abbreviations

|       |                                          |
|-------|------------------------------------------|
| HCV   | hepatitis C virus                        |
| CHC   | chronic Hepatitis C                      |
| FPR   | fibrosis progression rate                |
| BMI   | body mass index                          |
| HBV   | hepatitis B virus                        |
| HIV   | human immunodeficiency virus             |
| MMLE  | markov maximum likelihood estimation     |
| ALT   | alanine aminotransferase                 |
| RNA   | ribonucleic acid                         |
| CI    | confidence interval                      |
| IDU   | injection drug user                      |
| RR    | relative risk                            |
| scFPR | stage-constant fibrosis progression rate |

## Abstract

**Objectives:** Mathematical models are increasingly important in planning for the upcoming chronic hepatitis C (CHC) elimination efforts. Such models require reliable natural history inputs to make accurate predictions on health and economic outcomes. Yet, HCV disease progression is known to vary widely in the literature and published inputs are currently outdated. The objectives of this study were to obtain updated estimates of fibrosis progression rates (FPRs) in treatment-naïve CHC patients and to explore sources of heterogeneity.

**Design:** A systematic review was conducted using Ovid-MEDLINE, Ovid-EMBASE, and PubMed databases (January 1990 – January 2018) to identify observational studies of hepatic fibrosis in treatment-naïve CHC patients.

**Outcomes:** Stage-constant FPRs were estimated for each study given the reported fibrosis scores and duration of infection. Stage-specific FPRs (i.e., F0→F1; F1→F2; F2→F3; F3→F4) were estimated using Markov Maximum Likelihood estimation. Estimates were pooled using random-effects meta-analysis and heterogeneity was evaluated by stratification and random-effects meta-regression.

**Results:** The review identified 111 studies involving 131 groups of patients (N=42,693). The pooled stage-constant FPR was 0.094 (95%CI, 0.088-0.100), stage-specific FPRs were F0→F1: 0.107 (95%CI, 0.097-0.118); F1→F2: 0.082 (95%CI, 0.074-0.091); F2→F3: 0.117 (95%CI, 0.107-0.129); F3→F4: 0.116 (95%CI, 0.104-0.131). Stratified analysis revealed substantial variation in progression by study population. Meta-regression indicated associations between progression and infection age, duration, source, viral genotype and study population. Findings indicate that FPRs display substantial heterogeneity across study populations and pooled values from more homogenous subpopulations should be considered when estimating prognosis.

**Conclusions:** This large meta-analysis presents updated prognostic estimates for CHC derived from newer studies using better diagnostic methods and improves estimates for important patient populations in terms of clinical policy (e.g., injection drug users, non-clinical populations, liver clinic patients) and should be a valuable resource for patients, clinicians and clinical policy makers.

## Strengths and limitations of this study

- Our updated meta-analysis is now the largest review of HCV prognosis including English and non-English language observational studies.
- We use Markov maximum likelihood estimation method, which does not rely on the assumption of a linear disease progression to obtain detailed stage-specific estimates of fibrosis progression.
- Further, we restrict our meta-analysis to newer studies using better diagnostic methods compared to earlier reviews.
- Our analysis presents more precise prognostic estimates for important CHC subpopulations in terms of clinical policy (i.e., injection drug users, blood transfusion cohorts, liver clinic patients and non-clinical populations).
- Finally, we extensively explore study, clinical and viral sources of heterogeneity using stratification and through meta-regression analyses.

## Introduction

An estimated ~3% of the world's population is infected with the Hepatitis C virus (HCV) [1]. Chronic HCV (CHC) eventually leads to fibrosis, cirrhosis, advanced liver disease, and death [1–3]. The level of CHC-related hepatic fibrosis is typically detected through histology using the METAVIR scoring system with scores ranging from F0 indicating no fibrosis to F4 indicating cirrhosis. Published estimates of CHC prognosis has shown large variability in the rate of fibrosis progression across these stages [4–7].

Fortunately, HCV treatment has been revolutionized by highly effective therapies making elimination a plausible objective. Recently, the World Health Organization (WHO) launched a global strategy to this end, targeting a 90% reduction in new infections, a 65% reduction in liver-related death, a diagnosis rate of 90% and a treatment rate of 80% by 2030. This will necessitate radical expansions in prevention, screening and linkage to care [8].

However, a key challenge to the development of national elimination strategies has been the lack of reliable estimates of local disease burden, HCV prevalence and the prevalence of the undiagnosed population [8]. Currently, the only way to estimate such unknown parameters involves mathematical modeling. For this reason, WHO has been assisting countries through expert consultation and modelling initiatives [8]. Mathematical models are also increasingly important for estimating the health and economic consequences of scaling-up screening and treatment programs. However, these models require reliable natural history inputs to make accurate predictions [9,10]. Yet, HCV disease progression is known to vary widely in the literature and published natural history inputs are currently outdated [4–7].

In general, the variability in HCV disease progression has been attributed to differences in the study population (e.g., liver clinic, blood donors, injection drug users); differences due to study setting (i.e., clinical vs. non-clinical); differences among study subjects with respect to clinical risk factors for disease progression [11–13]; as well as to variation in the methods used for calculating fibrosis progression rates (FPRs) [14].

The established clinical risk factors for rapid progression of hepatic fibrosis include older age, male gender, excessive alcohol use, high body mass index (BMI), and HBV or HIV coinfection [11–13].

1  
2  
3 However, more recent studies have indicated race/ethnicity and viral genotype as possible risk factors as  
4 well [15–19]. Studies have also suggested that patients identified in clinical settings display a more rapid  
5 progression compared to those identified in non-clinical settings, for example by screening programs [4].  
6  
7

8  
9 In terms of methodological variability, studies generally estimate progression using two methods: a direct  
10 method involving serial biopsies, and an indirect method involving a single biopsy and the estimated  
11 duration of infection [14]. Multiple biopsies are less common and often involve patients who need to be  
12 monitored closely for rapid progression; while, the more common indirect method assumes a constant  
13 progression rate from the time of infection despite evidence indicating variability between stages  
14 [4,20,21].  
15  
16  
17  
18  
19  
20

21 To account for stage-specific variation in progression, Yi *et al* [21] have proposed the Markov Maximum  
22 Likelihood Estimation (MMLE) method, which can estimate accurate stage-specific FPRs from  
23 observational studies where only a single biopsy and the estimated duration of infection are available.  
24 This has improved the external validity and accuracy of stage-specific progression estimates by allowing  
25 much larger numbers of single biopsy studies to inform HCV prognosis [21].  
26  
27  
28  
29  
30

31 A previous systematic review from our group has estimated FPRs using this method [4]. This study has  
32 been widely-used in pharmacoeconomic evaluations. However, since its publication, a decade ago, new  
33 prognostic studies have become available, highlighting additional sources of variability (i.e., viral  
34 genotype, race/ethnicity) that merit further investigation [15–18,22,23].  
35  
36  
37  
38  
39

40 Given the availability of new research and the importance of natural history estimates particularly for  
41 informing forthcoming elimination policies, the objectives of this study were: (1) to refine progression  
42 estimates through an updated systematic review of observational studies examining hepatic fibrosis in  
43 treatment naïve HCV-infected individuals and (2) to further explore additional sources of heterogeneity.  
44  
45  
46  
47  
48

## 49 **Materials and methods**

### 50 **Data sources**

51  
52 A systematic literature search was conducted using Ovid MEDLINE, Ovid EMBASE, and PubMed  
53 databases without language restriction by an experienced medical librarian (JB) [original: January 1990-  
54  
55  
56  
57  
58



1  
2  
3 August 2007; update: January 2007-January 2018]. Additionally, the search was supplemented by  
4 citation searches and by reviewing references of relevant studies. Search strings for each database are  
5 provided in **Supplemental Methods**.  
6  
7

## 8 9 **Study selection**

10  
11 Records were imported to EndNote X7.7.1 (Thomson Reuters, New York City, NY, USA). After duplicate  
12 removal, potentially relevant studies were screened against eligibility criteria by two independent  
13 reviewers. Disagreements were resolved through discussion.  
14  
15

16  
17  
18 Studies were included if they satisfied the following criteria: (1) CHC defined as the presence of anti-HCV  
19 antibody detected by second or third generation enzyme-linked immunosorbent assay and at least one of  
20 the following: HCV RNA detected by polymerase chain reaction, recombinant immunoblot assay, elevated  
21 alanine aminotransferase (ALT), or liver biopsy; (2) full-length peer-reviewed original observational study;  
22 and (3) no HCV treatment prior to biopsy. Studies involving fewer than 20 cases, post-liver transplant  
23 patients and those where FPRs could not be calculated were excluded. Multiple reports from the same  
24 study were identified by comparing author, year, and sample size. The report with the most complete  
25 information was preferred, if equivalent, then the most recent publication was included.  
26  
27  
28  
29  
30  
31  
32  
33

## 34 **Data extraction**

35  
36 Study, host, viral and liver-disease related information were extracted in duplicate by two independent  
37 reviewers using piloted forms. For non-English studies, native speakers were contacted for help with full-  
38 text review and data extraction processes. A complete list of abstracted data items and all abstracted  
39 data are provided in the **Supplement**.  
40  
41  
42  
43

44  
45 Age at HCV acquisition, for studies that did not report this information, was imputed by taking the  
46 difference between age at assessment and the estimated duration of infection. For some studies that  
47 report composite fibrosis stages (e.g., F0/F1), data were distributed 50:50 across F0 and F1. Stage  
48 distribution was not performed when more than two stages were reported collectively (e.g., F0/F1/F2).  
49 Definitions used by reviewers and criteria used to convert histological and non-invasive scores to the  
50 METAVIR system are provided in **S1 and S2 Tables** respectively.  
51  
52  
53  
54  
55  
56  
57  
58  
59  
60

## Study quality

To improve accuracy and reduce relevant areas of bias, the updated meta-analysis was restricted to newer studies where all participants had confirmatory RNA testing for CHC. Further, studies were stratified by two independent reviewers by the mode of infection, which can influence the estimation of the duration of infection, as well as by study design, setting and population based on criteria described in **Table S2**. Finally, other clinical factors such as excess alcohol use and HIV or HBV coinfection among study subjects were adjusted for using meta-regression analyses.

## Estimation of fibrosis progression rates

Two methods were used to estimate the annual FPRs for each included study: (1) The stage-constant FPR was estimated by dividing the total number of transitions in METAVIR units by the person-years of HCV infection; (2) The stage-specific FPRs (i.e., F0→1, F1→2, F2→3 and F3→F4) were estimated using the MMLE method [21].

## Data synthesis

Identified groups were stratified by methodological and clinical subgroups. Estimates were pooled by random-effects meta-analyses. Time-to-cirrhosis was determined using the pooled stage-specific progression rates ( $\alpha_s$ ) [4,21]:

$$\text{Time to Cirrhosis} = \left( \frac{1}{\alpha_{01}} + \frac{1}{\alpha_{12}} + \frac{1}{\alpha_{23}} + \frac{1}{\alpha_{34}} \right)$$

Finally, the pooled FPRs and their 95% confidence intervals (CI) were used to estimate the mean cumulative probability of cirrhosis up to 40 years after HCV exposure for clinically important subpopulations.

## Heterogeneity

For all estimates, publication bias, small study effects and heterogeneity were assessed by visual inspection of funnel plots of the natural log of FPRs against inverse variance. A statistical test for funnel plot was not performed due to presence of significant heterogeneity (**S1 Fig**) [24,25]. Heterogeneity was quantified using the  $I^2$  statistic, with values of 25% and 75% indicating low and high heterogeneity [26].

1  
2  
3 Previously identified sources of heterogeneity (e.g., study-related, methodological, clinical and viral) were  
4 explored through stratification and random-effects meta-regression analyses using a linear mixed model –  
5 maximum likelihood method weighted by a multiplicative variance adjustment factor [4,11–13,17]. Missing  
6 values were imputed using the mean values. The natural log of FPRs were used as the dependent  
7 variable.  
8  
9  
10  
11  
12

### 13 **Statistical analysis**

14  
15 Statistical analysis was conducted using SAS (SAS Inc, Cary, NC, USA) and PROC MIXED and PROC  
16 MIXED ML procedures were used for all meta-analyses and meta-regression analyses. The plots were  
17 generated using RStudio v1.1.383 (RStudio, Boston, MA, USA). A two-sided significance level of 0.05  
18 was used to indicate significance for hypothesis tests.  
19  
20  
21  
22  
23

## 24 **Results**

### 25 **Study selection**

26  
27 The current study is an update of a previous review covering the period from January 1990 to August  
28 2007 [4]. The updated literature search (January 2007- January 2018) identified a total 10,440 records  
29 (**Fig 1**). Following duplicate removal, 7,193 abstracts were screened, and 1,304 records were included for  
30 full-text review. Overall, the update identified 45 new studies reporting on 60 new patient groups (24,689  
31 HCV infected subjects) resulting in total of 140 studies and 171 groups of patients (57,810 subjects) in  
32 combination with the earlier review. Group-level summary of study and participant characteristics are  
33 provided in **S3 and S4 Tables** respectively.  
34  
35  
36  
37  
38  
39  
40  
41  
42

43 However, the updated meta-analysis was restricted to newer studies where all participants had HCV RNA  
44 testing. After elimination of 40 study groups where RNA status was either missing or unclear, the updated  
45 meta-analysis included 111 studies reporting on 131 groups of patients (42,693 subjects and 723,058  
46 person-years of follow-up time).  
47  
48  
49  
50  
51  
52  
53  
54  
55  
56  
57  
58  
59  
60

## Study characteristics

The study characteristics of the 131 groups are summarized in **Table 1**. A majority, 84% (N=110), of the included groups were assessed in a clinical setting (vs. non-clinical). Compared to the original review, the update identified relatively more patients evaluated in a non-clinical setting [12% (N=3,068) of original vs. 31% (N=5,392) of new subjects]. In terms of study design, a majority, 68% (N=88) used a cross-sectional/retrospective vs. a retrospective-prospective study design.

Regarding the patient populations, liver clinic patients were the most frequently studied group (69%). In total, there were 91 groups of liver clinic patients; 10 of injection drug users (IDUs); 6 of dialysis patients; 5 of females, 4 community, renal transplant recipients and infectious diseases patients; 3 of blood donor groups; and 2 of pediatric and post-transfusion groups (**Table 1**). Furthermore, the update identified a total of 10 evaluations of genotype-1, 3 of genotype-3 and 1 each of genotypes 2 and 4 infected groups.

## Clinical characteristics of study subjects

The clinical characteristics of subjects are summarized in **S5 Table**. The majority of the subjects were male (62%) and white (69%). The mean age at assessment of liver fibrosis was 44 years, the mean age at infection was 26 years and the mean duration of infection of 18 years. The average prevalence of excess alcohol use was 20%. Injection drug use accounted for 43% and blood transfusion for 26% of infections. Cirrhosis was present in 12%. The majority, of the subjects (76%) had an elevated ALT. The mean ALT of all subjects was 88IU/L. In terms of viral genotype, the average prevalence of genotype-1 was 56%, genotype-3 was 18%. On average, 2% of subjects were coinfecting with HIV and 0.4% with HBV.

## Overall fibrosis progression rates

The pooled stage-constant FPR was 0.094 (95%CI, 0.088-0.100) METAVIR units per year (**Table 2**). The stage-specific FPR estimates were generally lower for transitioning between F0→F1 (0.107; 95%CI, 0.097-0.118) and F1→F2 (0.082; 95%CI, 0.074-0.091); relative to F2→F3 (0.117; 95%CI, 0.107-0.129) and F3→F4 (0.116; 95%CI, 0.104-0.131). Overall, the estimated time-to-cirrhosis was 39 years. The  $I^2$ -

1  
2  
3 statistic indicated a high level of heterogeneity which were relatively more pronounced at earlier stages.

4  
5 The pooled FPRs stratified by study update are provided in **S6 Table**.

### 6 7 8 **Stratification by study setting and design**

9  
10 Time-to-cirrhosis estimates indicated a faster progression to cirrhosis in groups evaluated in a clinical vs.  
11 non-clinical setting (37 vs. 47 years) (**Table 2**). In terms of study design, there was only a small difference  
12 in progression among cross-sectional/retrospective vs. retrospective-prospective design (38 vs. 41 years),  
13 which was lost following adjustment for covariates (**S7 Table**). The cumulative probability of cirrhosis by  
14 study setting is presented in **Fig 2**.

### 15 16 17 18 19 20 **Stratification by study population**

21  
22 Time-to-cirrhosis estimates indicated a relatively slower progression to cirrhosis for the female (74 years),  
23 blood donor (63 years), pediatric (45 years), and post transfusion cohorts (44 years) and a faster  
24 progression for infectious diseases (19 years), renal transplant (24 years), dialysis (35 years), community  
25 (35 years) and IDU (37 years) populations relative to liver clinic populations (40 years) (**Table 2**).

26  
27 In general, simple stratification by study population was able to explain heterogeneity in estimates  
28 primarily for the later stages of disease. However, a high level of heterogeneity persisted for liver clinic,  
29 IDU and community groups. The unadjusted cumulative probability of cirrhosis for different study  
30 populations are displayed in **Fig 2**.

31  
32 Based on time-to-cirrhosis estimates derived from covariate-adjusted FPRs, female (52 years), blood  
33 donor (55 years) and post-transfusion (44 years) groups maintained a relatively slower progression, while  
34 pediatric groups (36 years) displayed a slightly faster progression relative to liver clinic populations (38  
35 years) (**S7 Table**). Infectious diseases (34 years) and community (33 years) groups maintained a  
36 relatively faster progression following adjustments, while the covariate-adjusted progression was  
37 somewhat comparatively slower for dialysis patients (47 years), renal transplant (39 years) and IDUs (40  
38 years).

### Stratification by publication year

Based on unadjusted time-to-cirrhosis estimates, earlier studies (< year 2000) indicated a slower progression to cirrhosis (49 years) vs. studies published after 2000 (**Table 2**). This was also apparent following covariate adjustment (**S7 Table**).

### Stratification by age and duration of infection

In terms of age, groups with a younger mean age at assessment (<40 years) displayed a faster progression to cirrhosis (33 years) vs. an older age ( $\geq 40$ ) (40 years) (**Table 2**). While groups with an older age at infection ( $\geq 30$  years) displayed a more rapid progression (20-28 years) relative to a younger age (< 30 years) (42-45 years). Fibrosis also progressed faster (17 years) in groups with a shorter duration of infection (< 10 years).

### Stratification by viral genotype

Regarding viral genotype, groups infected with viral genotype-1 displayed a much slower progression to cirrhosis vs. genotype-3 (59 vs. 30 years) (**Table 2**). Slower progression for genotype-1 vs. genotype-3 groups remained following covariate adjustments (43 vs. 34 years) (**S7 Table**). In the stratified analysis, genotype-3 groups exhibited considerably less heterogeneity vs. genotype-1. The unadjusted cumulative probability of cirrhosis for genotypes 1 and 3 are displayed in **Fig 2**.

### Univariate analysis

In the univariate analyses, most clinical covariates displayed an association with at least one progression estimate except for HIV coinfection, male sex, white and Asian race (**S8 Table**). For more advanced stages of disease, genotype-1 was associated with a slower progression to advanced fibrosis (F2→F3; RR=0.53) and to cirrhosis (F3→F4; RR=0.39); while, genotype-3 was associated with faster progression to cirrhosis (RR=2.62). Additionally, injection drug related infections displayed faster (RR=1.65) and black race slower progression (RR=0.47) to cirrhosis.

Regarding study-related factors, studies conducted in a non-clinical setting (vs. clinical) indicated a slower progression in the earlier stages of disease (RR=0.68-0.75). In terms of study population, relative to liver clinic patients, IDUs (RR=1.72) and infectious diseases groups (RR=2.26), displayed a faster and females

(RR=0.46) displayed a slower progression to cirrhosis. For earlier stages, dialysis, renal transplant and infectious diseases populations all exhibited a faster (RR=2.12-2.54) and females again displayed a slower progression (RR=0.45). Many covariates (e.g., infectious diseases, females, genotype 3) were also associated with the overall progression (scFPR).

## Multivariable analysis

After adjusting for multiple covariates (**Table 3**), the duration of infection remained independently associated with slower progression for all FPRs (RR=0.94-0.97). Age at infection was also independently associated with faster progression between F1→F2 (RR=1.03) and with overall progression (scFPR; RR=1.01). Similarly, blood transfusion-related infection displayed faster progression from F0→F1 (RR=2.37) and in overall progression (scFPR; RR=1.63). Regarding viral genotype, following adjustment for covariates, genotype-1 was significantly associated with a slower progression between F2→F3 (RR=0.58) and faster progression from F0→F1 (RR=1.61). No significant association was observed for viral genotype-3 or for ethnicity. In terms of study-related factors, only dialysis populations maintained a significant association after covariate-adjustment, exhibiting a slower progression vs. liver clinic patients, at early stages (F1→F2; RR=0.58). Based on the adjusted-R<sup>2</sup>, covariates explained ~38-56% of the heterogeneity in the stage-specific FPR estimates and 87% in the stage-constant estimate.

## Discussion

Our large systematic review of HCV natural history presents updated and refined estimates of CHC-related hepatic fibrosis progression in treatment naïve patients. Overall, the updated estimates were generally consistent with previous studies and indicated an average time-to-cirrhosis of ~39 years [4,27,28]. However, the current study found a slightly slower progression compared to our previous analysis, especially at the earliest stage of fibrosis [4].

The current update improves upon our previous analysis by focusing on more recent studies where CHC was confirmed by better diagnostic methods and by incorporating substantially more subjects identified in a non-clinical setting (8,460 vs. 3,068) and more IDU populations (5,132 vs. 670) thereby providing more precise estimates of progression for these important subpopulations. Further, we identified study

1  
2  
3 population as an important source of heterogeneity indicating that population-specific estimates should be  
4 considered when estimating prognosis.  
5  
6

7  
8 In our updated analysis we also further explored the effects of viral genotype and race/ethnicity on  
9 prognosis. Univariate analyses identified genotype-3 as a predictor of faster and genotype-1 a predictor of  
10 slower progression from advanced fibrosis to cirrhosis. Similarly, a previous meta-analysis of stage-  
11 constant FPR also found a faster progression for genotype-3 vs non-3 groups [17]. Due to the small  
12 number of studies a meta-regression could not be used to explore confounders in that study. In our large  
13 meta-regression, genotype-1 displayed a faster progression at the earliest but a slower progression at  
14 more advanced stages of fibrosis. Similarly, univariate analysis also indicated a slower progression from  
15 significant fibrosis to cirrhosis for black race and female populations in agreement with previous studies;  
16 [19,23,29] although these relationships were lost upon covariate adjustment.  
17  
18  
19  
20  
21  
22  
23  
24

25 Our study is limited in several ways. We excluded reports where the data on infection duration were not  
26 available. Thus, the results may not be generalizable to individuals with an unknown source of infection.  
27  
28 Moreover, estimates based on self-report such as, the duration of infection, alcohol and drug use, may  
29 suffer from recall bias. Studies in IDUs suggest that there may exist a median lag of ~3 years between the  
30 first year of drug use and HCV-infection [16,30]. Therefore, the accuracy of the estimates of infection  
31 duration may vary by the mode of infection [31], resulting in a possible underestimation of FPRs for IDUs.  
32  
33 Additionally, alcohol use tends to be inconsistently reported. Finally, aggregated analyses may suffer from  
34 ecological fallacy [32]. It is also important to note that although newer non-invasive methods are replacing  
35 biopsy, non-invasive prognosis currently remains limited making biopsy-based stage-specific estimates  
36 the most suitable method for representing the natural history of HCV at the current time [33].  
37  
38  
39  
40  
41  
42  
43  
44

45 Finally, our analyses identified substantial heterogeneity, especially among earlier vs. later stages of  
46 fibrosis. This is not surprising as published estimates are known to vary extensively. While we have  
47 explained some of this variation, it is possible that some heterogeneity is also related to sampling  
48 variability associated with biopsies, though, non-invasive estimates also demonstrate considerable  
49 variability [33]. Other sources of variation may include obesity, steatosis, insulin resistance or genetic  
50 factors that can moderate fibrogenesis, which remain largely unreported in the literature [34–38].  
51  
52  
53  
54  
55  
56  
57  
58  
59



1  
2  
3 Furthermore,  $I^2$ -statistic, which measures the extent of variation due to heterogeneity vs. sampling error  
4 may be inflated when study sizes are large or sampling error is low as in our case [39].  
5  
6

7 Our study also has significant strengths: (1) it is the largest meta-analysis of HCV prognosis including  
8 English and non-English language studies; (2) it uses the MMLE method to obtain detailed stage-specific  
9 estimates of HCV prognosis in treatment naïve patients, a method that does not rely on the assumption of  
10 linear disease progression; (3) compared to our original study, the current update improves the precision  
11 of prognostic estimates for important patient groups in terms of clinical-policy (i.e., asymptomatic patients  
12 identified in non-clinical settings through screening efforts, injection drug users, blood transfusion  
13 populations, liver clinic patients); (4) our update was also restricted to more recent studies where CHC is  
14 identified using better diagnostic tests; (5) further, the large numbers of included studies has allowed for  
15 us to explain ~38-87% of the apparent heterogeneity in progression; and finally, (6) we present natural  
16 history data that can be easily applied to mathematical models for estimating HCV prevalence, disease  
17 burden, resource utilization, budget impact and cost-effectiveness, all of which will be necessary for  
18 planning appropriate elimination programs in the near future. Furthermore, given the level of  
19 heterogeneity identified across studies, our updated analysis suggests that pooled progression estimates  
20 from more homogenous subpopulations should be considered when estimating prognosis in policy  
21 models.  
22  
23  
24  
25  
26  
27  
28  
29  
30  
31  
32  
33  
34  
35  
36

37 In Conclusion, the accurate estimation of HCV disease progression remains important in the era of HCV  
38 elimination particularly due to existing policy question around elimination strategies, which necessitate  
39 modeling-based methods to help inform policy. The current study is now the largest and most detailed  
40 review of HCV prognosis, which presents more precise prognostic estimates for important subpopulations  
41 in terms of clinical policy and should be a valuable resource for clinicians, patients and particularly clinical  
42 policy makers.  
43  
44  
45  
46  
47  
48  
49  
50  
51  
52  
53  
54  
55  
56  
57  
58  
59  
60

## References

- 1 Wasley A, Alter M. Epidemiology of hepatitis C: geographic differences and temporal trends. *Hepat C State Art Millenn* 2000;**20**:1–16.
- 2 Alter MJ. Epidemiology of hepatitis C. *Hepatology* 1997;**26**:62S–65S. doi:10.1002/hep.510260711
- 3 Charlton M. Hepatitis C Infection in Liver Transplantation. *Am. J. Transplant.* 2001;**1**:197–203. doi:10.1034/j.1600-6143.2001.001003197.x
- 4 Thein H-HH, Yi Q, Dore GJ, *et al.* Estimation of stage-specific fibrosis progression rates in chronic hepatitis C virus infection: A meta-analysis and meta-regression. *Hepatology* 2008;**48**:418–31. doi:10.1002/hep.22375
- 5 Poynard T, Ratzu V, Charlotte F, *et al.* Rates and risk factors of liver fibrosis progression in patients with chronic hepatitis C. *J Hepatol* 2001;**34**:730–9. doi:10.1016/S0168-8278(00)00097-0
- 6 McCaughan GW, George J. Fibrosis progression in chronic hepatitis C virus infection. *Gut.* 2004;**53**:318–21. doi:10.1136/gut.2003.026393
- 7 Wiese M, Fischer J, Lobermann M, *et al.* Evaluation of liver disease progression in the German hepatitis C virus (1b)-contaminated anti-D cohort at 35 years after infection. *Hepatology* 2014;**59**:49–57. doi:10.1002/hep.26644
- 8 Papatheodoridis G V., Hatzakis A, Cholongitas E, *et al.* Hepatitis C: The beginning of the end—key elements for successful European and national strategies to eliminate HCV in Europe. *J. Viral Hepat.* 2018;**25**:6–17. doi:10.1111/jvh.12875
- 9 Sweeting MJ, De Angelis D, Brant LJ, *et al.* The burden of hepatitis C in England. *J Viral Hepat* 2007;**14**:570–6. doi:10.1111/j.1365-2893.2007.00851.x
- 10 Trubnikov M, Yan P, Archibald C. Estimated prevalence of hepatitis C virus infection in Canada, 2011. *Canada Commun Dis Rep* 2014;**40**:429–36.
- 11 Poynard T, Bedossa P, Opolon P. Natural history of liver fibrosis progression in patients with chronic hepatitis C. The OBSVIRC, METAVIR, CLINIVIR, and DOSVIRC groups. *Lancet* 1997;**349**:825–32.
- 12 Marcellin P, Asselah T, Boyer N. Fibrosis and disease progression in hepatitis C. [Review] [63 refs]. *Hepatology* 2002;**36**:S87–56. doi:10.1002/hep.1840360707
- 13 Freeman AJ, Dore GJ, Law MG, *et al.* Estimating progression to cirrhosis in chronic hepatitis C virus infection. *Hepatology* 2001;**34**:809–16. doi:10.1053/jhep.2001.27831
- 14 Poynard, T., Ratzu, V., Benmanov, Y., Di Martino, V., Bedossa, P., & Opolon P. Fibrosis in patients with chronic hepatitis C: detection and significance. *Semin Liver Dis vol 20, no 1* 2000;**20**:47–56.
- 15 Goossens N, Negro F. Is genotype 3 of the hepatitis C virus the new villain? *Hepatology* 2014;**59**:2403–12. doi:10.1002/hep.26905
- 16 Rüeger S, Bochud P-Y, Dufour J-F, *et al.* Impact of common risk factors of fibrosis progression in chronic hepatitis C. *Gut* 2015;**64**:1605–15. doi:10.1136/gutjnl-2014-306997
- 17 Probst A, Dang T, Bochud M, *et al.* Role of hepatitis C virus genotype 3 in liver fibrosis progression—a systematic review and meta-analysis. *J Viral Hepat* 2011;**18**:745–59. doi:10.1111/j.1365-2893.2011.01481.x
- 18 Bochud P-Y, Cai T, Overbeck K, *et al.* Genotype 3 is associated with accelerated fibrosis progression in chronic hepatitis C. *J Hepatol* 2009;**51**:655–66. doi:10.1016/j.jhep.2009.05.016
- 19 Crosse K, Umeadi OG, Anania F a, *et al.* Racial differences in liver inflammation and fibrosis

- related to chronic hepatitis C. *Clin Gastroenterol Hepatol* 2004;**2**:463–8.
- 20 Datz C, Cramp M, Haas T, *et al*. The natural course of hepatitis C virus infection 18 years after an epidemic outbreak of non-A, non-B hepatitis in a plasmapheresis centre. *Gut* 1999;**44**:563–7. doi:10.1136/gut.44.4.563
- 21 Yi Q, Wang PP, Krahn M. Improving the accuracy of long-term prognostic estimates in hepatitis C virus infection. *J Viral Hepat* 2004;**11**:166–74. doi:10.1046/j.1365-2893.2003.00484.x
- 22 Terrault NA, Im K, Boylan R, *et al*. Fibrosis progression in African Americans and Caucasian Americans with chronic hepatitis C. *Clin Gastroenterol Hepatol* 2008;**6**:1403–11. doi:10.1016/j.cgh.2008.08.006
- 23 Wiley TE, Brown J, Chan J. Hepatitis C infection in African Americans: its natural history and histological progression. *Am J Gastroenterol* 2002;**97**:700–6. doi:10.1111/j.1572-0241.2002.05555.x
- 24 Higgins JP, Green S, editors. *Cochrane Handbook for Systematic Reviews of Interventions*. Chichester, UK: : John Wiley & Sons, Ltd 2008. doi:10.1002/9780470712184
- 25 Ioannidis JPA, Trikalinos TA. The appropriateness of asymmetry tests for publication bias in meta-analyses: A large survey. *CMAJ* Published Online First: 2007. doi:10.1503/cmaj.060410
- 26 Higgins JPT, Thompson SG, Deeks JJ, *et al*. Measuring inconsistency in meta-analyses. *BMJ Br Med J* 2003;**327**:557–60. doi:10.1136/bmj.327.7414.557
- 27 Freeman AJ, Dore GJ, Law MG, *et al*. Estimating progression to cirrhosis in chronic hepatitis C virus infection. *Hepatology* 2001;**34**:809–16. doi:10.1053/jhep.2001.27831
- 28 Sweeting MJ, De Angelis D, Neal KR, *et al*. Estimated progression rates in three United Kingdom hepatitis C cohorts differed according to method of recruitment. *J Clin Epidemiol* 2006;**59**:144–52. doi:10.1016/j.jclinepi.2005.06.008
- 29 Terrault NA, Im K, Boylan R, *et al*. Fibrosis Progression in African Americans and Caucasian Americans With Chronic Hepatitis C. *Clin Gastroenterol Hepatol* 2008;**6**:1403–11. doi:10.1016/j.cgh.2008.08.006
- 30 Hagan H, Thiede H, Des Jarlais DC. Hepatitis C Virus Infection Among Injection Drug Users. *Epidemiology* 2004;**15**:543–9. doi:10.1097/01.ede.0000135170.54913.9d
- 31 Bruden DL, McMahon BJ, Hennessy TW, *et al*. Estimating the date of hepatitis C virus infection from patient interviews and antibody tests on stored sera. *Am J Gastroenterol* 2004;**99**:1517–22. doi:10.1111/j.1572-0241.2004.30826.x
- 32 Thompson SG, Higgins JPT. How should meta-regression analyses be undertaken and interpreted? *Stat Med* 2002;**21**:1559–73. doi:10.1002/sim.1187
- 33 Erman A, Sathya A, Nam A, *et al*. Estimating Chronic Hepatitis C Prognosis Using Transient Elastography-Based Liver Stiffness: A Systematic Review and Meta-Analysis. *J Viral Hepat* 2017;**;**1–12. doi:10.1111/jvh.12846
- 34 Patin E, Kutalik Z, Guergnon J, *et al*. Genome-wide association study identifies variants associated with progression of liver fibrosis from HCV infection. *Gastroenterology* 2012;**143**. doi:10.1053/j.gastro.2012.07.097
- 35 Paris AJ, Snapir Z, Christopherson CD, *et al*. A polymorphism that delays fibrosis in hepatitis C promotes alternative splicing of AZIN1, reducing fibrogenesis. *Hepatology* 2011;**54**:2198–207. doi:10.1002/hep.24608
- 36 Lo Iacono O, Venezia G, Petta S, *et al*. The impact of insulin resistance, serum adipocytokines and visceral obesity on steatosis and fibrosis in patients with chronic hepatitis C. *Aliment Pharmacol Ther* 2007;**25**:1181–91.

- 1  
2  
3 37 Fartoux L, Poujol-Robert A, Guéchet J, *et al.* Insulin resistance is a cause of steatosis and fibrosis  
4 progression in chronic hepatitis C. *Gut* 2005;**54**:1003–8. doi:10.1136/gut.2004.050302  
5  
6 38 Hui JM, Sud A, Farrell GC, *et al.* Insulin Resistance Is Associated with Chronic Hepatitis C and  
7 Virus Infection Fibrosis Progression. *Gastroenterology* 2003;**125**:1695–704.  
8 doi:10.1053/j.gastro.2003.08.032  
9 39 Rucker G, Schwarzer G, Carpenter JR, *et al.* Undue reliance on I2 in assessing heterogeneity may  
10 mislead. *BMC Med Res Methodol* 2008;**8**. doi:10.1186/1471-2288-8-79  
11  
12  
13  
14  
15  
16  
17  
18  
19  
20  
21  
22  
23  
24  
25  
26  
27  
28  
29  
30  
31  
32  
33  
34  
35  
36  
37  
38  
39  
40  
41  
42  
43  
44  
45  
46  
47  
48  
49  
50  
51  
52  
53  
54  
55  
56  
57  
58  
59  
60

For peer review only

Table 1: Summary of subgroups included in the meta-analysis.

|                                        | Updated Review<br>(1990-2018) |        | Original Review<br>(1990-2007) |        | New Groups<br>(2007-2018) |        |
|----------------------------------------|-------------------------------|--------|--------------------------------|--------|---------------------------|--------|
|                                        | N                             | SS     | N                              | SS     | N                         | SS     |
| <b>All groups</b>                      | 131                           | 42,693 | 81                             | 25,492 | 50                        | 17,201 |
| <b>Study setting</b>                   |                               |        |                                |        |                           |        |
| Clinical                               | 110                           | 34,233 | 70                             | 22,424 | 40                        | 11,809 |
| Non-clinical                           | 21                            | 8,460  | 11                             | 3,068  | 10                        | 5,392  |
| <b>Study design</b>                    |                               |        |                                |        |                           |        |
| Cross-sectional/Retrospective          | 88                            | 29,088 | 72                             | 22,921 | 16                        | 6,167  |
| Retrospective-Prospective              | 43                            | 13,605 | 9                              | 2,571  | 34                        | 11,034 |
| <b>Study population</b>                |                               |        |                                |        |                           |        |
| Females                                | 5                             | 1,420  | 4                              | 1,400  | 1                         | 20     |
| Blood donors                           | 3                             | 408    | 2                              | 223    | 1                         | 185    |
| Pediatric patients                     | 2                             | 223    | 0                              | .      | 2                         | 223    |
| Post transfusion                       | 2                             | 509    | 1                              | 469    | 1                         | 40     |
| Liver clinic                           | 91                            | 32,524 | 61                             | 21,338 | 30                        | 11,186 |
| Injection drug users                   | 10                            | 5,132  | 4                              | 670    | 6                         | 4,462  |
| Community                              | 4                             | 1,451  | 3                              | 1,044  | 1                         | 407    |
| Dialysis patients                      | 6                             | 408    | 3                              | 191    | 3                         | 217    |
| Renal transplant                       | 4                             | 179    | 3                              | 157    | 1                         | 22     |
| Infectious diseases                    | 4                             | 439    | 0                              | .      | 4                         | 439    |
| <b>Publication year</b>                |                               |        |                                |        |                           |        |
| <2000                                  | 4                             | 629    | 4                              | 629    | 0                         | 0      |
| 2000 to <2005                          | 56                            | 16,460 | 54                             | 16,309 | 2                         | 151    |
| 2005 to <2010                          | 37                            | 12,041 | 23                             | 8,554  | 14                        | 3,487  |
| ≥2010                                  | 34                            | 13,563 | 0                              | .      | 34                        | 13,563 |
| <b>Age at assessment</b>               |                               |        |                                |        |                           |        |
| Age <40                                | 23                            | 5,540  | 13                             | 2,166  | 10                        | 3,374  |
| Age ≥ 40                               | 108                           | 37,153 | 68                             | 23,326 | 40                        | 13,827 |
| <b>Estimated age at infection</b>      |                               |        |                                |        |                           |        |
| <20 years                              | 11                            | 2,318  | 4                              | 662    | 7                         | 1,656  |
| 30 to <40 years                        | 95                            | 35,926 | 64                             | 21,576 | 31                        | 14,350 |
| 20 to <30 years                        | 19                            | 3,864  | 13                             | 3,254  | 6                         | 610    |
| ≥40 years                              | 6                             | 585    | 0                              | .      | 6                         | 585    |
| <b>Estimated duration of infection</b> |                               |        |                                |        |                           |        |
| <10 years                              | 8                             | 834    | 2                              | 212    | 6                         | 622    |
| 10 to <20 years                        | 71                            | 21,949 | 50                             | 13,800 | 21                        | 8,149  |
| ≥ 20 years                             | 52                            | 19,910 | 29                             | 11,480 | 23                        | 8,430  |
| <b>HCV genotype</b>                    |                               |        |                                |        |                           |        |
| Genotype 1                             | 10                            | 3,000  | 5                              | 1,854  | 5                         | 1,146  |
| Genotype 2                             | 1                             | 90     | 0                              | .      | 1                         | 90     |
| Genotype 3                             | 3                             | 1,426  | 0                              | .      | 3                         | 1,426  |
| Genotype 4                             | 1                             | 117    | 0                              | .      | 1                         | 117    |

Table 1. Summary of subgroups included in the meta-analysis. The meta-analysis was restricted to 131 study groups (81 from the original review and 50 new groups) where CHC was confirmed by HCV RNA testing in all subjects. Abbreviations: N: number of groups included in the meta-analysis; SS: total sample size in each group.; CHC: chronic hepatitis C.

Table 2: Random-effects meta-analysis of hepatic fibrosis progression rates stratified by CHC subgroups.

|                                        | N   | F0 → F1 |        |                |     | F1 → F2 |        |                |      | F2 → F3 |        |                |      | F3 → F4 |        |                |      | scFPR |        |                |      | TTC* (yrs) |
|----------------------------------------|-----|---------|--------|----------------|-----|---------|--------|----------------|------|---------|--------|----------------|------|---------|--------|----------------|------|-------|--------|----------------|------|------------|
|                                        |     | Mean    | 95% CI | I <sup>2</sup> |     | Mean    | 95% CI | I <sup>2</sup> |      | Mean    | 95% CI | I <sup>2</sup> |      | Mean    | 95% CI | I <sup>2</sup> |      | Mean  | 95% CI | I <sup>2</sup> |      |            |
| <b>All groups</b>                      | 131 | 0.107   | 0.097  | 0.118          | 98% | 0.082   | 0.074  | 0.091          | 97%  | 0.117   | 0.107  | 0.129          | 94%  | 0.116   | 0.104  | 0.131          | 89%  | 0.094 | 0.088  | 0.100          | 85%  | 39         |
| <b>Study setting</b>                   |     |         |        |                |     |         |        |                |      |         |        |                |      |         |        |                |      |       |        |                |      |            |
| Clinical                               | 110 | 0.114   | 0.103  | 0.126          | 98% | 0.086   | 0.077  | 0.096          | 98%  | 0.118   | 0.106  | 0.132          | 93%  | 0.119   | 0.105  | 0.133          | 89%  | 0.097 | 0.091  | 0.103          | 82%  | 37         |
| Non-clinical                           | 21  | 0.077   | 0.058  | 0.104          | 98% | 0.065   | 0.053  | 0.081          | 96%  | 0.111   | 0.088  | 0.139          | 91%  | 0.101   | 0.068  | 0.150          | 94%  | 0.076 | 0.036  | 0.150          | 90%  | 47         |
| <b>Study design</b>                    |     |         |        |                |     |         |        |                |      |         |        |                |      |         |        |                |      |       |        |                |      |            |
| Cross-sectional/Retrospective          | 88  | 0.114   | 0.101  | 0.129          | 98% | 0.082   | 0.072  | 0.094          | 98%  | 0.119   | 0.107  | 0.133          | 93%  | 0.120   | 0.105  | 0.136          | 87%  | 0.097 | 0.090  | 0.104          | 84%  | 38         |
| Retrospective-Prospective              | 43  | 0.093   | 0.079  | 0.110          | 98% | 0.082   | 0.071  | 0.094          | 96%  | 0.114   | 0.094  | 0.138          | 95%  | 0.110   | 0.087  | 0.140          | 92%  | 0.088 | 0.078  | 0.098          | 85%  | 41         |
| <b>Study population**</b>              |     |         |        |                |     |         |        |                |      |         |        |                |      |         |        |                |      |       |        |                |      |            |
| Females                                | 5   | 0.048   | 0.026  | 0.088          | 97% | 0.051   | 0.043  | 0.061          | 27%* | 0.071   | 0.049  | 0.103          | 47%* | 0.051   | 0.025  | 0.106          | 46%* | 0.053 | 0.036  | 0.078          | 53%* | 74         |
| Blood donors                           | 3   | 0.067   | 0.017  | 0.264          | 96% | 0.051   | 0.020  | 0.128          | 82%  | 0.094   | 0.018  | 0.487          | 83%  | 0.057   | 0.009  | 0.340          | 55%* | 0.065 | 0.028  | 0.152          | 42%* | 63         |
| Pediatric patients                     | 2   | 0.201   | 0.074  | 0.550          | 0%* | 0.087   | 0.015  | 0.506          | 56%* | 0.096   | 0.107  | 0.125          | 87%  | 0.055   | 0.028  | 0.585          | 0%*  | 0.133 | 0.009  | 1.984          | 0%*  | 45         |
| Post transfusion                       | 2   | 0.065   | 0.034  | 0.125          | 0%* | 0.079   | 0.002  | 2.593          | 80%  | 0.114   | 0.038  | 0.341          | 0%*  | 0.134   | 0.033  | 0.545          | 0%*  | 0.081 | 0.028  | 0.230          | 0%*  | 44         |
| Liver clinic                           | 91  | 0.106   | 0.095  | 0.118          | 98% | 0.082   | 0.072  | 0.092          | 98%  | 0.111   | 0.100  | 0.123          | 94%  | 0.112   | 0.100  | 0.127          | 88%  | 0.092 | 0.087  | 0.099          | 65%* | 40         |
| Injection drug users                   | 10  | 0.109   | 0.071  | 0.168          | 99% | 0.071   | 0.052  | 0.096          | 96%  | 0.121   | 0.086  | 0.170          | 92%  | 0.194   | 0.135  | 0.278          | 84%  | 0.094 | 0.072  | 0.123          | 88%  | 37         |
| Community                              | 4   | 0.134   | 0.082  | 0.218          | 94% | 0.088   | 0.047  | 0.164          | 96%  | 0.111   | 0.074  | 0.167          | 83%  | 0.133   | 0.065  | 0.271          | 88%  | 0.104 | 0.086  | 0.125          | 22%* | 35         |
| Dialysis patients                      | 6   | 0.121   | 0.060  | 0.244          | 95% | 0.074   | 0.047  | 0.116          | 69%* | 0.250   | 0.114  | 0.547          | 71%* | 0.114   | 0.069  | 0.189          | 0%*  | 0.100 | 0.068  | 0.148          | 20%* | 35         |
| Renal transplant                       | 4   | 0.225   | 0.094  | 0.540          | 89% | 0.173   | 0.070  | 0.426          | 84%  | 0.190   | 0.074  | 0.490          | 64%* | 0.117   | 0.041  | 0.331          | 0%*  | 0.190 | 0.076  | 0.475          | 60%* | 24         |
| Infectious diseases                    | 4   | 0.144   | 0.084  | 0.247          | 89% | 0.211   | 0.145  | 0.307          | 48%* | 0.273   | 0.096  | 0.774          | 89%  | 0.256   | 0.047  | 1.379          | 92%  | 0.171 | 0.097  | 0.302          | 68%* | 19         |
| <b>Publication year</b>                |     |         |        |                |     |         |        |                |      |         |        |                |      |         |        |                |      |       |        |                |      |            |
| <2000                                  | 4   | 0.068   | 0.030  | 0.154          | 96% | 0.049   | 0.024  | 0.103          | 84%  | 0.124   | 0.058  | 0.264          | 48%* | 0.172   | 0.058  | 0.513          | 48%* | 0.068 | 0.033  | 0.143          | 61%* | 49         |
| 2000 to <2005                          | 56  | 0.119   | 0.101  | 0.140          | 98% | 0.076   | 0.064  | 0.091          | 98%  | 0.116   | 0.101  | 0.132          | 91%  | 0.122   | 0.106  | 0.140          | 79%  | 0.095 | 0.087  | 0.105          | 83%  | 38         |
| 2005 to <2010                          | 37  | 0.096   | 0.081  | 0.113          | 98% | 0.085   | 0.074  | 0.097          | 94%  | 0.100   | 0.085  | 0.117          | 92%  | 0.092   | 0.074  | 0.114          | 89%  | 0.087 | 0.078  | 0.097          | 82%  | 43         |
| ≥2010                                  | 34  | 0.106   | 0.088  | 0.129          | 98% | 0.096   | 0.080  | 0.116          | 97%  | 0.143   | 0.113  | 0.181          | 96%  | 0.137   | 0.102  | 0.184          | 95%  | 0.102 | 0.090  | 0.116          | 86%  | 34         |
| <b>Age at assessment</b>               |     |         |        |                |     |         |        |                |      |         |        |                |      |         |        |                |      |       |        |                |      |            |
| Age<40                                 | 23  | 0.128   | 0.096  | 0.172          | 98% | 0.088   | 0.069  | 0.112          | 96%  | 0.142   | 0.114  | 0.177          | 86%  | 0.141   | 0.105  | 0.189          | 80%  | 0.113 | 0.095  | 0.134          | 78%  | 33         |
| Age≥40                                 | 108 | 0.103   | 0.093  | 0.114          | 98% | 0.081   | 0.072  | 0.091          | 98%  | 0.113   | 0.102  | 0.125          | 94%  | 0.113   | 0.099  | 0.127          | 90%  | 0.091 | 0.085  | 0.097          | 84%  | 40         |
| <b>Estimated age at infection</b>      |     |         |        |                |     |         |        |                |      |         |        |                |      |         |        |                |      |       |        |                |      |            |
| <20 years                              | 11  | 0.097   | 0.060  | 0.155          | 98% | 0.061   | 0.044  | 0.085          | 94%  | 0.118   | 0.082  | 0.170          | 84%  | 0.108   | 0.065  | 0.179          | 77%  | 0.083 | 0.063  | 0.110          | 75%* | 45         |
| 20 to <30 years                        | 95  | 0.100   | 0.090  | 0.112          | 98% | 0.075   | 0.068  | 0.084          | 98%  | 0.104   | 0.095  | 0.115          | 93%  | 0.109   | 0.096  | 0.124          | 90%  | 0.088 | 0.083  | 0.094          | 83%  | 42         |
| 30 to <40 years                        | 19  | 0.128   | 0.100  | 0.164          | 97% | 0.127   | 0.099  | 0.163          | 95%  | 0.177   | 0.136  | 0.229          | 91%  | 0.146   | 0.115  | 0.185          | 75%* | 0.124 | 0.104  | 0.146          | 79%  | 28         |
| ≥40 years                              | 6   | 0.200   | 0.143  | 0.278          | 82% | 0.147   | 0.090  | 0.239          | 83%  | 0.234   | 0.094  | 0.584          | 91%  | 0.246   | 0.098  | 0.619          | 78%  | 0.160 | 0.108  | 0.237          | 52%* | 20         |
| <b>Estimated duration of infection</b> |     |         |        |                |     |         |        |                |      |         |        |                |      |         |        |                |      |       |        |                |      |            |
| <10 years                              | 8   | 0.218   | 0.162  | 0.295          | 90% | 0.175   | 0.118  | 0.261          | 87%  | 0.290   | 0.136  | 0.619          | 89%  | 0.314   | 0.157  | 0.629          | 62%* | 0.209 | 0.168  | 0.258          | 0%*  | 17         |
| 10 to <20 years                        | 71  | 0.128   | 0.113  | 0.145          | 98% | 0.081   | 0.070  | 0.094          | 98%  | 0.130   | 0.116  | 0.145          | 89%  | 0.133   | 0.117  | 0.152          | 82%  | 0.106 | 0.099  | 0.114          | 75%* | 35         |
| ≥20 years                              | 52  | 0.075   | 0.067  | 0.084          | 97% | 0.075   | 0.067  | 0.084          | 95%  | 0.092   | 0.080  | 0.104          | 89%  | 0.090   | 0.076  | 0.106          | 91%  | 0.076 | 0.071  | 0.081          | 70%* | 49         |
| <b>HCV genotype</b>                    |     |         |        |                |     |         |        |                |      |         |        |                |      |         |        |                |      |       |        |                |      |            |
| Genotype-1                             | 10  | 0.072   | 0.049  | 0.108          | 98% | 0.074   | 0.052  | 0.107          | 96%  | 0.072   | 0.061  | 0.083          | 58%* | 0.056   | 0.029  | 0.107          | 92%  | 0.072 | 0.055  | 0.093          | 83%  | 59         |
| Genotype non-1                         | 6   | 0.096   | 0.065  | 0.142          | 93% | 0.091   | 0.070  | 0.117          | 76%  | 0.102   | 0.069  | 0.149          | 79%  | 0.175   | 0.112  | 0.274          | 63%* | 0.096 | 0.072  | 0.128          | 65%* | 37         |
| Genotype-3                             | 3   | 0.134   | 0.084  | 0.213          | 77% | 0.103   | 0.084  | 0.126          | 2%*  | 0.112   | 0.049  | 0.253          | 83%  | 0.247   | 0.165  | 0.370          | 0%*  | 0.119 | 0.080  | 0.175          | 36%* | 30         |
| Genotype non-3                         | 15  | 0.079   | 0.060  | 0.103          | 98% | 0.079   | 0.062  | 0.102          | 95%  | 0.076   | 0.067  | 0.087          | 66%* | 0.073   | 0.043  | 0.122          | 93%  | 0.077 | 0.065  | 0.092          | 78%  | 52         |

Table 2. Annual fibrosis progression rates based on random-effects meta-analyses. The meta-analysis was restricted to 131 study groups where CHC was confirmed by HCV RNA testing in all subjects. Abbreviations: scFPR: stage-constant annual progression rate (assuming linear progression from stage F0 to F4); I<sup>2</sup>: the proportion of variability in progression rates due to heterogeneity vs. sampling error; N: number of groups included in the meta-analysis; \*TTC: time-to-cirrhosis (based on unadjusted stage-specific FPRs). \*Study subgroups with low-to-moderate heterogeneity; \*\*Study populations are ordered by progression from slowest to fastest based on TTC. Notes: The estimates are not adjusted for covariates and maybe confounded. Note: Genotype non-1 and non-3 groups are composed of 65% genotype-3 and 82% genotype-1 respectively.



Table 3: Random-effects meta-regression of covariates associated with hepatic fibrosis progression rates

| Covariates                          | F0→F1* |       |              |             | F1→F2* |       |              |             | F2→F3* |       |              |             | F3→F4* |       |              |             | scFPR* |       |              |             |
|-------------------------------------|--------|-------|--------------|-------------|--------|-------|--------------|-------------|--------|-------|--------------|-------------|--------|-------|--------------|-------------|--------|-------|--------------|-------------|
|                                     | β      | SE    | P-value      | RR          |
| Intercept                           | -2.564 | 0.555 | <.0001       |             | -3.482 | 0.675 | <.0001       |             | -1.031 | 0.608 | 0.093        |             | -1.400 | 0.766 | 0.071        |             | -2.438 | 0.312 | <.0001       |             |
| <b>Study design</b>                 |        |       |              |             |        |       |              |             |        |       |              |             |        |       |              |             |        |       |              |             |
| Cross-sectional/Retro (ref)         |        |       |              | 1.00        |        |       |              | 1.00        |        |       |              | 1.00        |        |       |              | 1.00        |        |       |              | 1.00        |
| Retrospective-Prospective           | -0.088 | 0.093 | 0.347        | 0.92        | 0.041  | 0.113 | 0.717        | 1.04        | -0.001 | 0.100 | 0.991        | 1.00        | 0.036  | 0.126 | 0.773        | 1.04        | 0.011  | 0.050 | 0.834        | 1.01        |
| <b>Study population</b>             |        |       |              |             |        |       |              |             |        |       |              |             |        |       |              |             |        |       |              |             |
| Liver clinic (ref)                  |        |       |              | 1.00        |        |       |              | 1.00        |        |       |              | 1.00        |        |       |              | 1.00        |        |       |              | 1.00        |
| Females                             | -0.149 | 0.334 | 0.656        | 0.86        | 0.318  | 0.400 | 0.428        | 1.37        | -0.073 | 0.349 | 0.834        | 0.93        | -0.616 | 0.442 | 0.166        | 0.54        | -0.046 | 0.170 | 0.790        | 0.96        |
| Blood donors                        | -0.040 | 0.256 | 0.875        | 0.96        | -0.318 | 0.314 | 0.313        | 0.73        | -0.276 | 0.289 | 0.342        | 0.76        | -0.707 | 0.395 | 0.076        | 0.49        | -0.175 | 0.166 | 0.296        | 0.84        |
| Pediatric patients                  | 0.361  | 0.475 | 0.449        | 1.43        | 0.831  | 0.567 | 0.145        | 2.30        | -0.054 | 0.521 | 0.918        | 0.95        | -0.199 | 0.750 | 0.791        | 0.82        | 0.479  | 0.307 | 0.121        | 1.61        |
| Post-transfusion                    | -0.343 | 0.407 | 0.402        | 0.71        | -0.206 | 0.493 | 0.676        | 0.81        | -0.143 | 0.466 | 0.760        | 0.87        | -0.853 | 0.651 | 0.192        | 0.43        | -0.093 | 0.282 | 0.742        | 0.91        |
| Injecting drug users                | 0.278  | 0.221 | 0.211        | 1.32        | -0.310 | 0.268 | 0.251        | 0.73        | 0.120  | 0.243 | 0.621        | 1.13        | 0.499  | 0.293 | 0.091        | 1.65        | 0.070  | 0.115 | 0.543        | 1.07        |
| Community                           | 0.226  | 0.209 | 0.283        | 1.25        | 0.167  | 0.248 | 0.503        | 1.18        | 0.016  | 0.204 | 0.938        | 1.02        | 0.192  | 0.241 | 0.428        | 1.21        | 0.125  | 0.087 | 0.154        | 1.13        |
| Dialysis patients                   | -0.121 | 0.203 | 0.551        | 0.89        | -0.550 | 0.248 | <b>0.028</b> | <b>0.58</b> | 0.299  | 0.250 | 0.233        | 1.35        | -0.103 | 0.307 | 0.738        | 0.90        | -0.235 | 0.153 | 0.127        | 0.79        |
| Renal transplant recipients         | -0.012 | 0.236 | 0.961        | 0.99        | 0.262  | 0.285 | 0.359        | 1.30        | 0.064  | 0.274 | 0.815        | 1.07        | -0.372 | 0.412 | 0.368        | 0.69        | 0.164  | 0.191 | 0.390        | 1.18        |
| Infectious diseases                 | -0.261 | 0.241 | 0.282        | 0.77        | 0.304  | 0.294 | 0.304        | 1.35        | 0.264  | 0.257 | 0.305        | 1.30        | 0.211  | 0.314 | 0.502        | 1.24        | -0.013 | 0.139 | 0.924        | 0.99        |
| <b>Publication year</b>             |        |       |              |             |        |       |              |             |        |       |              |             |        |       |              |             |        |       |              |             |
| <2000 (ref)                         |        |       |              | 1.00        |        |       |              | 1.00        |        |       |              | 1.00        |        |       |              | 1.00        |        |       |              | 1.00        |
| 2000 to <2005                       | 0.406  | 0.241 | 0.094        | 1.50        | 0.116  | 0.299 | 0.698        | 1.12        | -0.010 | 0.295 | 0.973        | 0.99        | -0.543 | 0.369 | 0.143        | 0.58        | 0.227  | 0.164 | 0.169        | 1.25        |
| 2005 to <2010                       | 0.492  | 0.242 | <b>0.044</b> | <b>1.64</b> | 0.352  | 0.300 | 0.242        | 1.42        | -0.009 | 0.297 | 0.975        | 0.99        | -0.583 | 0.372 | 0.120        | 0.56        | 0.310  | 0.165 | 0.062        | 1.36        |
| ≥2010                               | 0.404  | 0.246 | 0.103        | 1.50        | 0.356  | 0.306 | 0.246        | 1.43        | 0.227  | 0.301 | 0.451        | 1.26        | -0.500 | 0.377 | 0.187        | 0.61        | 0.369  | 0.166 | <b>0.028</b> | <b>1.45</b> |
| <b>Gender – male†</b>               | 0.592  | 0.437 | 0.178        | 1.81        | 0.704  | 0.520 | 0.179        | 2.02        | -0.103 | 0.454 | 0.822        | 0.90        | -0.157 | 0.564 | 0.781        | 0.85        | 0.289  | 0.217 | 0.186        | 1.34        |
| <b>Age at HCV infection (yrs.)</b>  | 0.004  | 0.011 | 0.698        | 1.00        | 0.033  | 0.013 | <b>0.012</b> | <b>1.03</b> | 0.012  | 0.011 | 0.292        | 1.01        | 0.020  | 0.014 | 0.169        | 1.02        | 0.014  | 0.006 | <b>0.014</b> | <b>1.01</b> |
| <b>Duration of infection (yrs.)</b> | -0.063 | 0.010 | <.0001       | <b>0.94</b> | -0.028 | 0.012 | <b>0.022</b> | <b>0.97</b> | -0.048 | 0.010 | <.0001       | <b>0.95</b> | -0.043 | 0.013 | <b>0.001</b> | <b>0.96</b> | -0.049 | 0.005 | <.0001       | <b>0.95</b> |
| <b>Injecting drug use†</b>          | 0.194  | 0.248 | 0.435        | 1.21        | -0.114 | 0.298 | 0.701        | 0.89        | -0.117 | 0.262 | 0.656        | 0.89        | 0.301  | 0.328 | 0.361        | 1.35        | 0.090  | 0.132 | 0.497        | 1.09        |
| <b>Blood transfusion†</b>           | 0.862  | 0.298 | <b>0.005</b> | <b>2.37</b> | 0.260  | 0.355 | 0.466        | 1.30        | 0.219  | 0.302 | 0.469        | 1.25        | 0.464  | 0.369 | 0.211        | 1.59        | 0.486  | 0.145 | <b>0.001</b> | <b>1.63</b> |
| <b>Excess alcohol use†</b>          | -0.312 | 0.263 | 0.238        | 0.73        | 0.591  | 0.314 | 0.062        | 1.81        | 0.177  | 0.273 | 0.517        | 1.19        | 0.245  | 0.329 | 0.458        | 1.28        | 0.201  | 0.131 | 0.126        | 1.22        |
| <b>HIV positive†</b>                | 0.075  | 0.839 | 0.929        | 1.08        | 0.532  | 1.009 | 0.599        | 1.70        | -0.506 | 0.907 | 0.578        | 0.60        | 0.191  | 1.105 | 0.863        | 1.21        | -0.312 | 0.429 | 0.469        | 0.73        |
| <b>Genotype-1†</b>                  | 0.473  | 0.221 | <b>0.034</b> | <b>1.61</b> | -0.380 | 0.264 | 0.153        | 0.68        | -0.539 | 0.224 | <b>0.018</b> | <b>0.58</b> | -0.313 | 0.274 | 0.256        | 0.73        | -0.051 | 0.108 | 0.637        | 0.95        |
| <b>Genotype-3†</b>                  | 0.226  | 0.277 | 0.416        | 1.25        | 0.036  | 0.331 | 0.914        | 1.04        | -0.273 | 0.285 | 0.341        | 0.76        | 0.194  | 0.347 | 0.577        | 1.21        | 0.093  | 0.133 | 0.487        | 1.10        |
| <b>White†</b>                       | 0.160  | 0.197 | 0.420        | 1.17        | -0.047 | 0.238 | 0.845        | 0.95        | -0.325 | 0.208 | 0.120        | 0.72        | 0.032  | 0.256 | 0.900        | 1.03        | -0.045 | 0.102 | 0.660        | 0.96        |
| <b>Black†</b>                       | -0.302 | 0.273 | 0.272        | 0.74        | 0.332  | 0.330 | 0.317        | 1.39        | -0.011 | 0.287 | 0.970        | 0.99        | -0.609 | 0.356 | 0.089        | 0.54        | -0.005 | 0.139 | 0.971        | 0.99        |
| <b>Asian†</b>                       | 0.086  | 0.354 | 0.808        | 1.09        | 0.268  | 0.431 | 0.534        | 1.31        | 0.003  | 0.404 | 0.994        | 1.00        | 0.933  | 0.534 | 0.083        | 2.54        | 0.061  | 0.242 | 0.800        | 1.06        |
| $I^2_{Res}$                         |        | 96%   |              |             |        | 96%   |              |             |        | 86%   |              |             |        | 77%   |              |             |        |       | 39%          |             |
| Adjusted $R^2$                      |        | 56%   |              |             |        | 38%   |              |             |        | 54%   |              |             |        | 53%   |              |             |        |       | 87%          |             |

Table 3. Linear mixed model-maximum likelihood method. \*Log progression rates. †Proportion. Values in bold indicate statistical significance.

Abbreviations: scFPR: stage-constant annual fibrosis progression rates (assuming linear progression from F0 to F4); β: coefficient; SE: standard error; HIV: human immunodeficiency virus; RNA: ribonucleic acid; ref: reference category; adjusted  $R^2$ : the proportion of heterogeneity explained by covariates in the model;  $I^2_{res}$ : the proportion of residual variability due to heterogeneity.

## Figure legends

### **Fig 1. PRISMA flow diagram showing the study selection progress.**

The literature search recovered a total of 5,718 citations. Following duplicate removal and supplementary citation searches, the review process identified a total of 45 new studies reporting on 60 groups of HCV-infected patients. Together with the 95 studies reporting on 111 groups identified by the original review, the current update identified a total of 140 studies of 171 HCV-infected groups of patients. Meta-analysis was restricted to 111 studies reporting on 131 study groups where CHC was confirmed by HCV RNA testing in all subjects.

### **Fig 2. Cumulative probability of cirrhosis for various patient populations.**

Figure showing the cumulative probability of cirrhosis over years of HCV infection for (A) all study groups by estimation method; and groups stratified by (B) study setting; (C) viral genotype; and (D) study population using stage-specific progression rate estimates. Cumulative probabilities are projected using unadjusted estimates and maybe confounded. Note: high degree of heterogeneity is present within liver



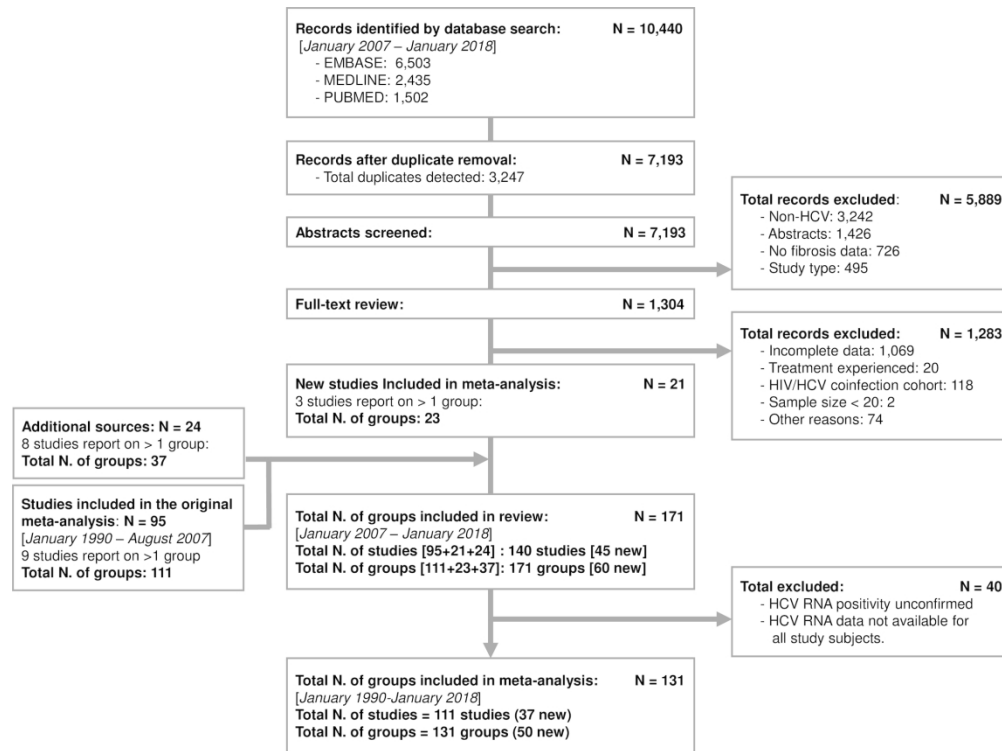

Fig 1. PRISMA flow diagram showing the study selection progress.

The literature search recovered a total of 5,718 citations. Following duplicate removal and supplementary citation searches, the review process identified a total of 45 new studies reporting on 60 groups of HCV-infected patients. Together with the 95 studies reporting on 111 groups identified by the original review, the current update identified a total of 140 studies of 171 HCV-infected groups of patients. Meta-analysis was restricted to 111 studies reporting on 131 study groups where CHC was confirmed by HCV RNA testing in all subjects.

190x142mm (300 x 300 DPI)

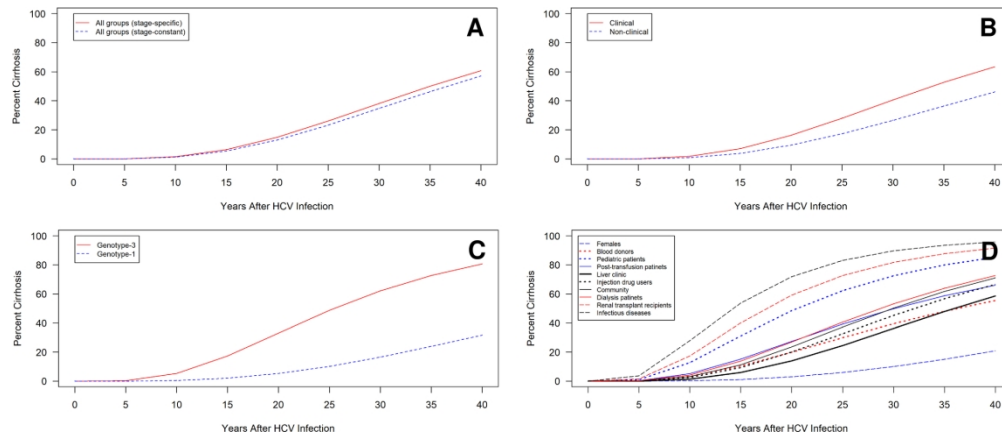

Fig 2. Cumulative probability of cirrhosis for various patient populations. Figure showing the cumulative probability of cirrhosis over years of HCV infection for (A) all study groups by estimation method; and groups stratified by (B) study setting; (C) viral genotype; and (D) study population using stage-specific progression rate estimates. Cumulative probabilities are projected using unadjusted estimates and maybe confounded. Note: high degree of heterogeneity is present within liver

190x80mm (300 x 300 DPI)

## Supplementary Materials

### List of Supplementary Materials:

1. S1 Figure: Funnel plots for hepatic fibrosis progression rates.
2. S1 Table : General definitions of study type, setting, and population
3. S2 Table : Fibrosis scoring systems for HCV
4. S3 Table : Table summarizing study characteristics of the 45 identified studies
5. S4 Table : Table summarizing patient characteristics for the 45 identified
6. List of 45 studies identified by updated systematic review
7. S5 Table : Summary of clinical characteristics of study subjects stratified by review update
8. S6 Table : Hepatic fibrosis progression rates stratified by review update
9. S7 Table : Covariate-adjusted hepatic fibrosis progression rates for CHC subgroups
10. S8 Table : Univariate random effects meta-regression of covariates associated with fibrosis progression
11. Database search strategy and search strings
12. List of extracted data items
13. Supplemental References

Supplementary Materials

S1 Figure : Funnel plots for hepatic fibrosis progression rate

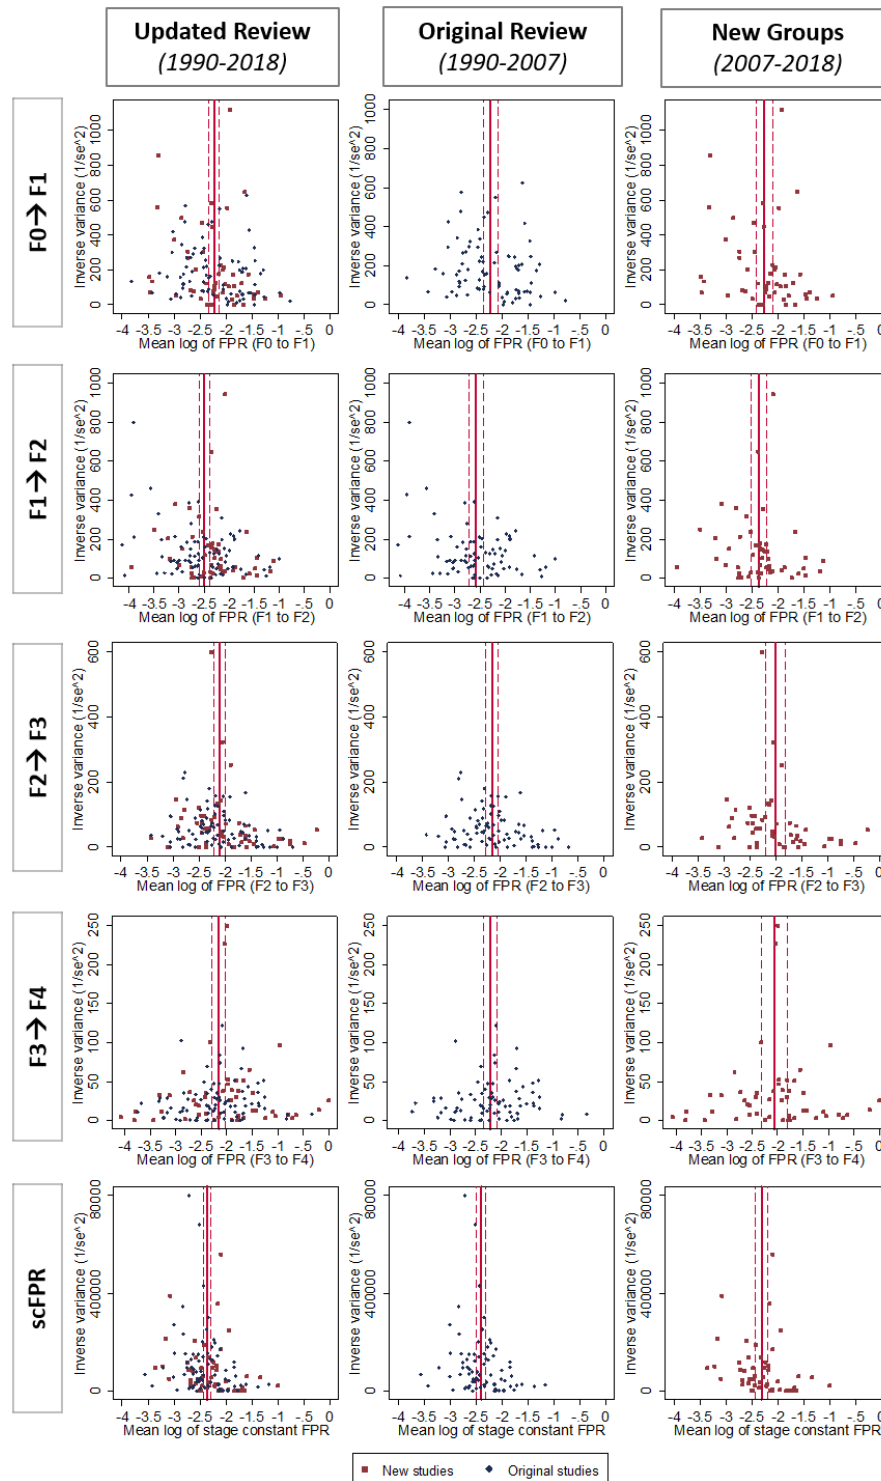

Supplementary Figure 1. Funnel plots of stage-specific and stage-constant (sc) FPRs for the 131 study groups included in the meta-analysis stratified by study update. Funnel plots were generated by plotting the natural log of FPRs against inverse variance.

## Supplementary Materials

### S1 Table : General definitions of study type, setting, and population

| <b>Study design</b>                 |                                                                                                                                                                                                                                                                                                                              |
|-------------------------------------|------------------------------------------------------------------------------------------------------------------------------------------------------------------------------------------------------------------------------------------------------------------------------------------------------------------------------|
| Cross-sectional/retrospective:      | Patients with liver disease presenting for clinical care, usually at tertiary care centers, where efforts were made to track the liver disease responsible for the referral back to the presumed time of infection, based on the history of receipt of blood or blood product or of the first use of injection drugs [1–17]. |
| Retrospective-prospective:          | Studies that identify groups of individuals who, in the past, were either asymptomatic or had developed recognized acute hepatitis C following an outbreak of HCV infection from a recognized source, who could be traced retrospectively, recontacted, and then followed-up prospectively [18–41].                          |
| <b>Study setting</b>                |                                                                                                                                                                                                                                                                                                                              |
| Clinical:                           | Individuals who were identified and/or assessed for their HCV status and liver disease in a clinical/tertiary care setting [2,3,12,14–16,20,21,23–26,4,27,30,35,36,38,39,41–44,5–11].                                                                                                                                        |
| Nonclinical:                        | Individuals who were screened for HCV in a nonclinical setting, for example, blood donation center or regional center [1,13,17–19,22,28,29,37,40].                                                                                                                                                                           |
| <b>Study population:</b>            |                                                                                                                                                                                                                                                                                                                              |
| Community:                          | HCV-infected individuals identified or participating in national health screening or studies conducted in nonclinical settings [18,45].                                                                                                                                                                                      |
| Liver clinic:                       | HCV-infected individuals referred to specialist liver clinics for further assessment [1,4,23–27,30,33,35,39,41,9,42,44,11,12,14–16,20,21].                                                                                                                                                                                   |
| Blood donors:                       | Individuals newly diagnosed with chronic HCV infection at blood donor screening [19,37].                                                                                                                                                                                                                                     |
| Dialysis patients:                  | HCV-infected individuals with end-stage renal disease receiving dialysis and awaiting renal transplantation [2,31,34].                                                                                                                                                                                                       |
| Injecting drug users:               | Individuals who acknowledged injection drug use as the main risk factor for HCV infection – not only active users [17,28,29,40,43].                                                                                                                                                                                          |
| Female cohorts:                     | Population of otherwise healthy females infected with HCV [13].                                                                                                                                                                                                                                                              |
| Pediatric population:               | Population of children infected with HCV [10,36].                                                                                                                                                                                                                                                                            |
| Post-transfusion cohorts:           | Population infected with HCV post-transfusion [8,22].                                                                                                                                                                                                                                                                        |
| Renal transplant:                   | Population renal transplant recipients infected with HCV [32,38].                                                                                                                                                                                                                                                            |
| Infectious diseases:                | HCV infected individuals managed at Infectious diseases unit [3,5–7].                                                                                                                                                                                                                                                        |
| <b>General:</b>                     |                                                                                                                                                                                                                                                                                                                              |
| Presumed date of HCV infection      | Date of transfusion of blood or blood products prior to 1992, when serologic screening for HCV became widely available, the first year of injecting drug use, or the date of a single and convincing parenteral exposure (e.g. needle-stick injury).                                                                         |
| Estimated duration of HCV infection | Time elapsed from the presumed date of infection to the date of liver biopsy. Estimated only for individuals with known risk factors.                                                                                                                                                                                        |
| Elevated ALT levels                 | ALT values abnormally elevated (more than the upper limit of normal values) at entry and at least once during the 6 months prior to screening.                                                                                                                                                                               |
| Excess alcohol consumption          | Accepted the definitions reported in the studies. Alcohol consumption of at least more than 20 g/day in the past 12 months of study entry.                                                                                                                                                                                   |

Supplementary Table 1. Abbreviations: HCV: Hepatitis C virus; ALT: alanine aminotransferase. References provided for newly identified studies only.

## Supplementary Materials

S2 Table : Fibrosis scoring systems for HCV

| HCV disease severity     | Liver Biopsy (LB)                       |           |         |       | Transient Elastography (TE)       |       |            |
|--------------------------|-----------------------------------------|-----------|---------|-------|-----------------------------------|-------|------------|
|                          | Histological Scoring Systems            |           |         |       | Liver Stiffness Measurement (LSM) |       |            |
|                          | METAVIR                                 |           | Knodell | Ishak | LSM cut-off (kPa)                 | AUROC | References |
| <b>No fibrosis</b>       | <b>No fibrosis</b>                      | <b>F0</b> | F0      | 0     | -                                 | -     | [46]       |
| <b>Mild fibrosis</b>     | <b>Portal fibrosis without septa</b>    | <b>F1</b> | F1      | 1     | <7.1                              | -     |            |
| <b>Moderate fibrosis</b> | <b>Portal fibrosis with rare septa</b>  | <b>F2</b> | F3      | 2     | 7.1-9.5                           | 0.83  |            |
| <b>Severe fibrosis</b>   | <b>Numerous septa without cirrhosis</b> | <b>F3</b> | F3      | 3-4   | 9.5-12.5                          | 0.84  |            |
| <b>Cirrhosis</b>         | <b>Cirrhosis</b>                        | <b>F4</b> | F4      | 5-6   | ≥12.5                             | 0.95  |            |

Supplementary Table 2. Table showing the criteria used to convert various invasive and non-invasive scoring systems to the well-validated METAVIR system. Abbreviations: LB: Liver biopsy; TE: Transient elastography/FibroScan; LSM: Liver stiffness measurement; METAVIR: Meta-analysis of histological data in viral hepatitis; AUROC: Area under the receiver operator curve.

## Supplementary Materials

S3 Table : Table summarizing study characteristics of the 45 identified studies

| Study ID | Study                    | Year | Country   | Language | Population          | Setting      | Design | Study SS | Biopsy SS | Assessment Method | Scoring system | Progression rates                                                                                                                |
|----------|--------------------------|------|-----------|----------|---------------------|--------------|--------|----------|-----------|-------------------|----------------|----------------------------------------------------------------------------------------------------------------------------------|
| 1        | Agostini 2007 [18]       | 2007 | France    | English  | Community           | Non-clinical | R-P    | 3794     | 1283      | LB                | METAVIR        | FPR <sub>0→1</sub> :0.119<br>FPR <sub>1→2</sub> :0.182<br>FPR <sub>2→3</sub> :0.186<br>FPR <sub>3→4</sub> :0.069<br>ScFPR: 0.137 |
| 2        | Allison 2012 [19]        | 2012 | USA       | English  | Blood donor         | Non-clinical | R-P    | 185      | 185       | LB                | Ishak          | FPR <sub>0→1</sub> :0.044<br>FPR <sub>1→2</sub> :0.072<br>FPR <sub>2→3</sub> :0.047<br>FPR <sub>3→4</sub> :0.022<br>ScFPR: 0.050 |
| 3        | Boonwaat 2010 [1]        | 2010 | Australia | English  | Liver clinic/prison | Non-clinical | C-S/R  | 371      | 153       | LB                | METAVIR        | FPR <sub>0→1</sub> :0.085<br>FPR <sub>1→2</sub> :0.114<br>FPR <sub>2→3</sub> :0.148<br>FPR <sub>3→4</sub> :0.047<br>ScFPR: 0.095 |
| 4        | Bourliere 2012 [30]      | 2012 | France    | English  | Liver clinic        | Clinical     | R-P    | 2066     | 1794      | LB                | METAVIR        | FPR <sub>0→1</sub> :0.118<br>FPR <sub>1→2</sub> :0.101<br>FPR <sub>2→3</sub> :0.084<br>FPR <sub>3→4</sub> :0.111<br>ScFPR: 0.100 |
| 5        | Contreras 2007 [2]       | 2007 | Mexico    | English  | Dialysis patients   | Clinical     | C-S/R  | 64       | 64        | LB                | Ishak          | FPR <sub>0→1</sub> :0.113<br>FPR <sub>1→2</sub> :0.205<br>FPR <sub>2→3</sub> :0.103<br>FPR <sub>3→4</sub> :0.123<br>ScFPR: 0.130 |
| 6        | Delgado-Borego 2010 [47] | 2010 | USA       | English  | Pediatric           | Clinical     | C-S/R  | 102      | 102       | LB                | METAVIR        | FPR <sub>0→1</sub> :0.203<br>FPR <sub>1→2</sub> :0.071<br>FPR <sub>2→3</sub> :0.220<br>FPR <sub>3→4</sub> :0.034<br>ScFPR: 0.131 |
| 7        | Forestier 2012 [35]      | 2012 | France    | English  | Liver clinic        | Clinical     | R-P    | 98       | 45        | LB                | METAVIR        | FPR <sub>0→1</sub> :0.208<br>FPR <sub>1→2</sub> :0.122<br>FPR <sub>2→3</sub> :0.123<br>FPR <sub>3→4</sub> :0.219<br>ScFPR: 0.152 |
| 8        | Goodman 2008 [36]        | 2008 | USA       | English  | Pediatric           | Clinical     | R-P    | 121      | 121       | LB                | Knodell        | FPR <sub>0→1</sub> :0.200<br>FPR <sub>1→2</sub> :0.106<br>FPR <sub>2→3</sub> :0.038<br>FPR <sub>3→4</sub> :0.129<br>ScFPR: 0.137 |
| 9        | Hui 2007 [11]            | 2007 | China     | English  | Liver clinic        | Clinical     | C-S/R  | 82       | 53        | LB                | METAVIR        | FPR <sub>0→1</sub> :0.033<br>FPR <sub>1→2</sub> :0.042<br>FPR <sub>2→3</sub> :0.095<br>FPR <sub>3→4</sub> :0.072<br>ScFPR: 0.041 |

## Supplementary Materials

| Study ID | Study                     | Year | Country     | Language | Population       | Setting      | Design            | Study SS | Biopsy SS | Assessment Method | Scoring system   | Progression rates                                                                                                                |
|----------|---------------------------|------|-------------|----------|------------------|--------------|-------------------|----------|-----------|-------------------|------------------|----------------------------------------------------------------------------------------------------------------------------------|
| 10a      | Liu 2014 – Marijuana [12] | 2014 | Canada      | English  | Liver clinic     | Clinical     | C-S/R             | 102      | 102       | LB                | Batts and Ludwig | FPR <sub>0→1</sub> :0.145<br>FPR <sub>1→2</sub> :0.159<br>FPR <sub>2→3</sub> :0.083<br>FPR <sub>3→4</sub> :0.123<br>ScFPR: 0.130 |
| 10b      | Liu 2014 – Marijuana [12] | 2014 | Canada      | English  | Liver clinic     | Clinical     | C-S/R             | 275      | 275       | LB                | Batts and Ludwig | FPR <sub>0→1</sub> :0.145<br>FPR <sub>1→2</sub> :0.109<br>FPR <sub>2→3</sub> :0.071<br>FPR <sub>3→4</sub> :0.102<br>ScFPR: 0.110 |
| 11       | Nanda 2012 [13]           | 2012 | Ireland     | English  | Female           | Non-clinical | C-S/R             | 20       | 20        | LB                | Ishak            | FPR <sub>0→1</sub> :0.023<br>FPR <sub>1→2</sub> :0.046<br>FPR <sub>2→3</sub> :0.098<br>FPR <sub>3→4</sub> :0.164<br>ScFPR: 0.033 |
| 12       | Rao 2012 [37]             | 2012 | China       | English  | Blood donor      | Non-clinical | R-P               | 348      | 175       | LSM               | METAVIR          | FPR <sub>0→1</sub> :0.054<br>FPR <sub>1→2</sub> :0.082<br>FPR <sub>2→3</sub> :0.116<br>FPR <sub>3→4</sub> :0.113<br>ScFPR: 0.068 |
| 13a      | Siddiqui 2008 [14]        | 2008 | USA         | English  | Liver clinic     | Clinical     | C-S/R             | 2035     | 1009      | LB                | METAVIR          | FPR <sub>0→1</sub> :0.077<br>FPR <sub>1→2</sub> :0.088<br>FPR <sub>2→3</sub> :0.143<br>FPR <sub>3→4</sub> :0.138<br>ScFPR: 0.087 |
| 13b      | Siddiqui 2008 [14]        | 2008 | USA         | English  | Liver clinic     | Clinical     | C-S/R             | 616      | 356       | LB                | METAVIR          | FPR <sub>0→1</sub> : 0.076<br>FPR <sub>1→2</sub> :0.102<br>FPR <sub>2→3</sub> :0.153<br>FPR <sub>3→4</sub> :0.190<br>ScFPR: 0.93 |
| 14       | Werner 2010 [38]          | 2010 | USA         | English  | Renal transplant | Clinical     | R-P               | 22       | 22        | LB                | Batts and Ludwig | FPR <sub>0→1</sub> :0.293<br>FPR <sub>1→2</sub> :0.230<br>FPR <sub>2→3</sub> :0.356<br>FPR <sub>3→4</sub> :0.336<br>ScFPR: 0.277 |
| 15a      | Bochud 2009 [39]          | 2009 | Switzerland | English  | Liver clinic     | Clinical     | <sup>14</sup> R-P | 607      | 607       | LB                | METAVIR          | FPR <sub>0→1</sub> :0.094<br>FPR <sub>1→2</sub> :0.067<br>FPR <sub>2→3</sub> :0.073<br>FPR <sub>3→4</sub> :0.125<br>ScFPR: 0.080 |
| 15b      | Bochud 2009 [39]          | 2009 | Switzerland | English  | Liver clinic     | Clinical     | R-P               | 90       | 90        | LB                | METAVIR          | FPR <sub>0→1</sub> :0.082<br>FPR <sub>1→2</sub> :0.84<br>FPR <sub>2→3</sub> :0.066<br>FPR <sub>3→4</sub> :0.082<br>ScFPR: 0.077  |

Supplementary Table 7 continued



## Supplementary Materials

| Study ID | Study              | Year | Country     | Language | Population   | Setting      | Design | Study SS | Biopsy SS | Assessment Method | Scoring system | Progression rates                                                                                                                |
|----------|--------------------|------|-------------|----------|--------------|--------------|--------|----------|-----------|-------------------|----------------|----------------------------------------------------------------------------------------------------------------------------------|
| 15c      | Bochud 2009 [39]   | 2009 | Switzerland | English  | Liver clinic | Clinical     | R-P    | 312      | 312       | LB                | METAVIR        | FPR <sub>0→1</sub> :0.115<br>FPR <sub>1→2</sub> :0.096<br>FPR <sub>2→3</sub> :0.080<br>FPR <sub>3→4</sub> :0.199<br>ScFPR: 0.101 |
| 15d      | Bochud 2009 [39]   | 2009 | Switzerland | English  | Liver clinic | Clinical     | R-P    | 117      | 117       | LB                | METAVIR        | FPR <sub>0→1</sub> :0.081<br>FPR <sub>1→2</sub> :0.075<br>FPR <sub>2→3</sub> :0.080<br>FPR <sub>3→4</sub> :0.167<br>ScFPR: 0.079 |
| 16       | Hissar 2009 [15]   | 2009 | India       | English  | Liver clinic | Clinical     | C-S/R  | 213      | 213       | LB                | Knodell        | FPR <sub>0→1</sub> :0.253<br>FPR <sub>1→2</sub> :0.166<br>FPR <sub>2→3</sub> :0.220<br>FPR <sub>3→4</sub> :0.160<br>ScFPR: 0.192 |
| 17       | Kallwitz 2010 [16] | 2010 | USA         | English  | Liver clinic | Clinical     | C-S/R  | 812      | 812       | LB                | METAVIR        | FPR <sub>0→1</sub> :0.087<br>FPR <sub>1→2</sub> :0.162<br>FPR <sub>2→3</sub> :0.110<br>FPR <sub>3→4</sub> :0.111<br>ScFPR: 0.099 |
| 18       | Kielland 2014 [40] | 2014 | Norway      | English  | IDU          | Non-clinical | R-P    | 61       | 61        | LB                | METAVIR        | FPR <sub>0→1</sub> :0.122<br>FPR <sub>1→2</sub> :0.022<br>FPR <sub>2→3</sub> :0.448<br>FPR <sub>3→4</sub> :0.270<br>ScFPR: 0.077 |
| 19a      | Larsen 2010 [17]   | 2010 | France      | English  | IDU          | Non-clinical | C-S/R  | 1077     | 493       | LB                | METAVIR        | FPR <sub>0→1</sub> :0.166<br>FPR <sub>1→2</sub> :0.104<br>FPR <sub>2→3</sub> :0.154<br>FPR <sub>3→4</sub> :0.273<br>ScFPR: 0.133 |
| 19b      | Larsen 2010 [17]   | 2010 | France      | English  | IDU          | Non-clinical | C-S/R  | 1986     | 1108      | LB                | METAVIR        | FPR <sub>0→1</sub> :0.138<br>FPR <sub>1→2</sub> :0.065<br>FPR <sub>2→3</sub> :0.106<br>FPR <sub>3→4</sub> :0.267<br>ScFPR: 0.101 |
| 20a      | Lawson 2010 [41]   | 2010 | UK          | English  | Liver clinic | Clinical     | R-P    | 87       | 39        | LB                | Ishak          | FPR <sub>0→1</sub> :0.038<br>FPR <sub>1→2</sub> :0.066<br>FPR <sub>2→3</sub> :0.158<br>FPR <sub>3→4</sub> :0.380<br>ScFPR: 0.049 |
| 20b      | Lawson 2010 [41]   | 2010 | UK          | English  | Liver clinic | Clinical     | R-P    | 1140     | 459       | LB                | Ishak          | FPR <sub>0→1</sub> :0.071<br>FPR <sub>1→2</sub> :0.152<br>FPR <sub>2→3</sub> :0.342<br>FPR <sub>3→4</sub> :0.198<br>ScFPR: 0.108 |

Supplementary Table 7 continued

## Supplementary Materials

| Study ID | Study                         | Year | Country                      | Language | Population          | Setting  | Design | Study SS | Biopsy SS | Assessment Method | Scoring system | Progression rates                                                                                                               |
|----------|-------------------------------|------|------------------------------|----------|---------------------|----------|--------|----------|-----------|-------------------|----------------|---------------------------------------------------------------------------------------------------------------------------------|
| 21       | Marabita 2011 [20]            | 2011 | Italy                        | English  | Liver clinic        | Clinical | R-P    | 247      | 247       | LB                | Ishak          | FPR <sub>0→1</sub> :0.193<br>FPR <sub>1→2</sub> :0.062<br>FPR <sub>2→3</sub> :0.067<br>FPR <sub>3→4</sub> :0.076<br>ScFPR:0.088 |
| 22a      | Patin 2012-French cohort [42] | 2012 | France                       | English  | Liver clinic        | Clinical | R-P    | 467      | 467       | LB                | METAVIR        | FPR <sub>0→1</sub> :0.121<br>FPR <sub>1→2</sub> :0.042<br>FPR <sub>2→3</sub> :0.530<br>FPR <sub>3→4</sub> :0.081<br>ScFPR:0.089 |
| 22b      | Patin 2012-Swiss cohort [42]  | 2012 | Switzerland                  | English  | Liver clinic        | Clinical | R-P    | 694      | 614       | LB                | METAVIR        | FPR <sub>0→1</sub> :0.093<br>FPR <sub>1→2</sub> :0.067<br>FPR <sub>2→3</sub> :0.058<br>FPR <sub>3→4</sub> :0.905<br>ScFPR:0.081 |
| 22c      | Patin 2012-US/France [42]     | 2012 | US/France                    | English  | Liver clinic        | Clinical | R-P    | 320      | 320       | LB                | METAVIR        | FPR <sub>0→1</sub> :0.088<br>FPR <sub>1→2</sub> :0.063<br>FPR <sub>2→3</sub> :0.099<br>FPR <sub>3→4</sub> :0.063<br>ScFPR:0.076 |
| 22d      | Patin 2012-International [42] | 2012 | Australia/<br>Germany/<br>UK | English  | Liver clinic        | Clinical | R-P    | 642      | 642       | LB                | METAVIR        | FPR <sub>0→1</sub> :0.103<br>FPR <sub>1→2</sub> :0.076<br>FPR <sub>2→3</sub> :0.087<br>FPR <sub>3→4</sub> :0.139<br>ScFPR:0.091 |
| 22e      | Patin 2012-Australian [42]    | 2012 | Australia                    | English  | Liver clinic        | Clinical | R-P    | 219      | 219       | LB                | METAVIR        | FPR <sub>0→1</sub> :0.140<br>FPR <sub>1→2</sub> :0.088<br>FPR <sub>2→3</sub> :0.077<br>FPR <sub>3→4</sub> :0.134<br>ScFPR:0.102 |
| 23       | Brescini 2014                 | 2014 | Italy                        | English  | Infectious diseases | Clinical | C-S/R  | 186      | 186       | LSM               | METAVIR        | FPR <sub>0→1</sub> :0.192<br>FPR <sub>1→2</sub> :0.246<br>FPR <sub>2→3</sub> :0.421<br>FPR <sub>3→4</sub> :0.597<br>ScFPR:0.234 |
| 24       | de Ledinghen 2008 [4]         | 2008 | Spain                        | English  | Liver clinic        | Clinical | C-S/R  | 656      | 656       | LSM               | METAVIR        | FPR <sub>0→1</sub> :0.045<br>FPR <sub>1→2</sub> :0.051<br>FPR <sub>2→3</sub> :0.109<br>FPR <sub>3→4</sub> :0.157<br>ScFPR:0.053 |
| 25       | Nunnari 2010 [5]              | 2010 | Italy                        | English  | Infectious diseases | Clinical | C-S/R  | 70       | 70        | LB                | METAVIR        | FPR <sub>0→1</sub> :0.157<br>FPR <sub>1→2</sub> :0.280<br>FPR <sub>2→3</sub> :0.174<br>FPR <sub>3→4</sub> :0.099<br>ScFPR:0.173 |

Supplementary Table 7 continued

## Supplementary Materials

| Study ID | Study                     | Year | Country   | Language | Population          | Setting      | Design | Study SS | Biopsy SS | Assessment Method  | Scoring system | Progression rates                                                                                                               |
|----------|---------------------------|------|-----------|----------|---------------------|--------------|--------|----------|-----------|--------------------|----------------|---------------------------------------------------------------------------------------------------------------------------------|
| 26       | Mazzocato 2014 [6]        | 2014 | Italy     | English  | Infectious diseases | Clinical     | C-S/R  | 115      | 115       | LSM                | METAVIR        | FPR <sub>0→1</sub> :0.172<br>FPR <sub>1→2</sub> :0.192<br>FPR <sub>2→3</sub> :0.658<br>FPR <sub>3→4</sub> :0.905<br>ScFPR:0.216 |
| 27       | Suarez-Zarracina 2012 [7] | 2012 | Spain     | English  | Infectious diseases | Clinical     | C-S/R  | 68       | 68        | LSM                | METAVIR        | FPR <sub>0→1</sub> :0.079<br>FPR <sub>1→2</sub> :0.138<br>FPR <sub>2→3</sub> :0.124<br>FPR <sub>3→4</sub> :0.082<br>ScFPR:0.095 |
| 28       | White 2012 [21]           | 2012 | USA       | English  | Liver clinic        | Clinical     | R-P    | 308      | 308       | FibroSURE-ActiTest | METAVIR        | FPR <sub>0→1</sub> :0.078<br>FPR <sub>1→2</sub> :0.103<br>FPR <sub>2→3</sub> :0.092<br>FPR <sub>3→4</sub> :0.069<br>ScFPR:0.078 |
| 29       | Reggiardo 2012 [22]       | 2012 | Argentina | English  | Blood transfusion   | Non-clinical | R-P    | 40       | 40        | LB                 | METAVIR        | FPR <sub>0→1</sub> :0.075<br>FPR <sub>1→2</sub> :0.050<br>FPR <sub>2→3</sub> :0.128<br>FPR <sub>3→4</sub> :0.017<br>ScFPR:0.066 |
| 30       | Liu 2014 [8]              | 2014 | China     | Chinese  | Blood transfusion   | Clinical     | C-S/R  | 96       | 52        | LSM                | METAVIR        | FPR <sub>0→1</sub> :0.106<br>FPR <sub>1→2</sub> :0.077<br>FPR <sub>2→3</sub> :0.154<br>FPR <sub>3→4</sub> :0.195<br>ScFPR:0.101 |
| 31a      | Terrault 2008 [23]        | 2008 | USA       | English  | Liver clinic        | Clinical     | R-P    | 157      | 157       | LB                 | Ishak          | FPR <sub>0→1</sub> :0.099<br>FPR <sub>1→2</sub> :0.080<br>FPR <sub>2→3</sub> :0.093<br>FPR <sub>3→4</sub> :0.030<br>ScFPR:0.081 |
| 31b      | Terrault 2008 [23]        | 2008 | USA       | English  | Liver clinic        | Clinical     | R-P    | 143      | 143       | LB                 | Ishak          | FPR <sub>0→1</sub> :0.100<br>FPR <sub>1→2</sub> :0.076<br>FPR <sub>2→3</sub> :0.076<br>FPR <sub>3→4</sub> :0.017<br>ScFPR:0.079 |
| 32       | Guyader 2007 [24]         | 2007 | France    | English  | Liver clinic        | Clinical     | R-P    | 586      | 580       | LB                 | METAVIR        | FPR <sub>0→1</sub> :0.075<br>FPR <sub>1→2</sub> :0.085<br>FPR <sub>2→3</sub> :0.136<br>FPR <sub>3→4</sub> :0.221<br>ScFPR:0.085 |
| 33       | Pradat 2007 [25]          | 2007 | France    | English  | Liver clinic        | Clinical     | R-P    | 247      | 247       | LB                 | METAVIR        | FPR <sub>0→1</sub> :0.237<br>FPR <sub>1→2</sub> :0.094<br>FPR <sub>2→3</sub> :0.149<br>FPR <sub>3→4</sub> :0.064<br>ScFPR:0.138 |

Supplementary Table 7 continued

## Supplementary Materials

| Study ID | Study                 | Year | Country | Language | Population        | Setting      | Design | Study SS | Biopsy SS | Assessment Method | Scoring system | Progression rates                                                                                                                  |
|----------|-----------------------|------|---------|----------|-------------------|--------------|--------|----------|-----------|-------------------|----------------|------------------------------------------------------------------------------------------------------------------------------------|
| 34a      | Castera 2004 [26]     | 2004 | France  | English  | Liver clinic      | Clinical     | R-P    | 37       | 37        | LB                | METAVIR        | FPR <sub>0→1</sub> :0.116<br>FPR <sub>1→2</sub> :0.176<br>FPR <sub>2→3</sub> :0.110<br>FPR <sub>3→4</sub> :0.218<br>ScFPR : 0.131  |
| 34b      | Castera 2004 [26]     | 2004 | France  | English  | Liver clinic      | Clinical     | R-P    | 114      | 114       | LB                | METAVIR        | FPR <sub>0→1</sub> :0.080<br>FPR <sub>1→2</sub> :0.111<br>FPR <sub>2→3</sub> :0.084<br>FPR <sub>3→4</sub> :0.175<br>ScFPR : 0.090  |
| 35a      | Mathurin 1998 [27]    | 1998 | France  | English  | Liver clinic      | Clinical     | R-P    | 102      | 67        | LB                | METAVIR        | FPR <sub>0→1</sub> :0.081<br>FPR <sub>1→2</sub> :0.034<br>FPR <sub>2→3</sub> :0.108<br>FPR <sub>3→4</sub> :0.281<br>ScFPR : 0.067  |
| 35b      | Mathurin 1998 [27]    | 1998 | France  | English  | Liver clinic      | Clinical     | R-P    | 102      | 101       | LB                | METAVIR        | FPR <sub>0→1</sub> :0.200<br>FPR <sub>1→2</sub> :0.098<br>FPR <sub>2→3</sub> :0.077<br>FPR <sub>3→4</sub> :0.201<br>ScFPR : 0.129  |
| 36       | Bruden, 2017[45]      | 2017 | USA     | English  | Community         | Non-clinical | R-P    | 407      | 407       | LB                | Ishak          | FPR <sub>0→1</sub> :0.091<br>FPR <sub>1→2</sub> :0.153<br>FPR <sub>2→3</sub> :0.088<br>FPR <sub>3→4</sub> :0.062<br>ScFPR : 0.994  |
| 37       | Cepeda, 2016[28]      | 2016 | Indian  | English  | IDU               | Non-clinical | R-P    | 281      | 281       | LSM               | METAVIR        | FPR <sub>0→1</sub> :0.088<br>FPR <sub>1→2</sub> :0.138<br>FPR <sub>2→3</sub> :0.242<br>FPR <sub>3→4</sub> :0.225<br>ScFPR : 0.118  |
| 38       | Cepeda, 2017[29]      | 2017 | USA     | English  | IDU               | Non-clinical | R-P    | 964      | 964       | LSM               | METAVIR        | FPR <sub>0→1</sub> :0.042<br>FPR <sub>1→2</sub> :0.053<br>FPR <sub>2→3</sub> :0.143<br>FPR <sub>3→4</sub> :0.113<br>ScFPR : 0.053  |
| 39       | Sakellariou, 2014[34] | 2014 | Greece  | English  | Dialysis patients | Clinical     | R-P    | 61       | 58        | LB                | Ishak          | FPR <sub>0→1</sub> :0.322<br>FPR <sub>1→2</sub> :0.0822<br>FPR <sub>2→3</sub> :0.803<br>FPR <sub>3→4</sub> :0.449<br>ScFPR : 0.238 |
| 40a      | Lemos, 2007 A[31]     | 2007 | Brazil  | English  | Dialysis patients | Clinical     | R-P    | 39       | 38        | LB                | Ludwig         | FPR <sub>0→1</sub> :0.092<br>FPR <sub>1→2</sub> :0.154<br>FPR <sub>2→3</sub> :0.116<br>FPR <sub>3→4</sub> :0.100<br>ScFPR : 0.105  |

Supplementary Table 7 continued

## Supplementary Materials

| Study ID | Study                  | Year | Country       | Language | Population           | Setting  | Design | Study SS | Biopsy SS | Assessment Method | Scoring system | Progression rates                                                                                                               |
|----------|------------------------|------|---------------|----------|----------------------|----------|--------|----------|-----------|-------------------|----------------|---------------------------------------------------------------------------------------------------------------------------------|
| 40b      | Lemos, 2007 B[31]      | 2007 | Brazil        | English  | Dialysis patients    | Clinical | R-P    | 117      | 117       | LB                | Ludwig         | FPR <sub>0→1</sub> :0.145<br>FPR <sub>1→2</sub> :0.100<br>FPR <sub>2→3</sub> :0.485<br>FPR <sub>3→4</sub> :0.192<br>ScFPR:0.144 |
| 41       | Delladetsima, 2013[32] | 2013 | Greece        | English  | Renal transplant     | Clinical | R-P    | 23       | 29        | LB                | Ishak          | FPR <sub>0→1</sub> :0.220<br>FPR <sub>1→2</sub> :0.102<br>FPR <sub>2→3</sub> :0.504<br>FPR <sub>3→4</sub> :0.655<br>ScFPR:0.196 |
| 42       | Besheer, 2017[33]      | 2017 | Egypt         | English  | Liver clinic         | Clinical | R-P    | 122      | 122       | LB                | METAVIR        | FPR <sub>0→1</sub> :0.150<br>FPR <sub>1→2</sub> :0.136<br>FPR <sub>2→3</sub> :0.179<br>FPR <sub>3→4</sub> :0.127<br>ScFPR:0.135 |
| 43       | Midgard, 2017[43]      | 2017 | International | English  | Injection drug users | Clinical | R-P    | 93       | 122       | LB/LSM/APRI       | METAVIR        | FPR <sub>0→1</sub> :0.052<br>FPR <sub>1→2</sub> :0.058<br>FPR <sub>2→3</sub> :0.173<br>FPR <sub>3→4</sub> :0.121<br>ScFPR:0.062 |
| 44       | Chen, 2017[44]         | 2017 | Australia     | English  | Liver clinic         | Clinical | R-P    | 131      | 122       | LB                | METAVIR        | FPR <sub>0→1</sub> :0.068<br>FPR <sub>1→2</sub> :0.081<br>FPR <sub>2→3</sub> :0.150<br>FPR <sub>3→4</sub> :0.245<br>ScFPR:0.081 |
| 45       | Valva, 2014[9]         | 2014 | Argentina     | English  | Liver clinic         | Clinical | C-S/R  | 32       | 122       | LB                | METAVIR        | FPR <sub>0→1</sub> :0.093<br>FPR <sub>1→2</sub> :0.163<br>FPR <sub>2→3</sub> :0.092<br>FPR <sub>3→4</sub> :0.027<br>ScFPR:0.098 |

Supplementary Table 7 continued

Supplementary Table 3. Table summarizing study characteristics for all 45 I studies identified by the updated systematic review. Abbreviations: HCV: Hepatitis C virus; C-S/R: cross-sectional/retrospective; R-P: retrospective-prospective; LB: liver biopsy; LSM: liver stiffness measurement; FPR: fibrosis progression rate; scFPR: stage-constant annual fibrosis progression rate (assuming constant progression over F0 to F4).

## Supplementary Materials

S4 Table : Table summarizing patient characteristics for the 45 identified studies

| Study ID | Study               | Age (yrs) | Gender (%Male) | DOI (yrs) | **Excess alcohol use (%) | HCV RNA+ (%) | HCV RNA load (log 10 IU/ml) | Genotype (%)                                    | Mode of Infection (%)             | BMI (kg/m <sup>2</sup> ) | HIV (%) | HBV (%) | METAVIR (%)                                                  | Mean ALT (IU/L) |
|----------|---------------------|-----------|----------------|-----------|--------------------------|--------------|-----------------------------|-------------------------------------------------|-----------------------------------|--------------------------|---------|---------|--------------------------------------------------------------|-----------------|
| 1        | Agostini 2007       | 42.4      | 62.86          | 12.00     | 11.41                    | 100.00       | .                           | GT1: .<br>GT2: .<br>GT3: .<br>GT4: .            | IDU: 65.8<br>BT: 14.4<br>SP: 19.8 | .                        | 10.36   | 0.00    | F0: 24.00<br>F1: 24.01<br>F2: 22.62<br>F3: 22.60<br>F4: 6.76 | .               |
| 2        | Allison 2012        | 43.1      | 50.81          | 25.00     | .                        | 100.00       | 3.32                        | GT1: 73.5<br>GT2: 16.8<br>GT3: 3.8<br>GT4: 1.1  | IDU: 0.0<br>BT: 100<br>SP: 0.0    | 33.76                    | .       | .       | F0: 32.97<br>F1: 26.49<br>F2: 25.95<br>F3: 12.43<br>F4: 2.16 | 70.22           |
| 3        | Boonwaat 2010       | 34.0      | 76.28          | 15.00     | 46.05                    | 100.00       | .                           | GT1: 22.9<br>GT2: 6.7<br>GT3: 23.7<br>GT4: 3.0  | IDU: 62.0<br>BT: 2.2<br>SP: .     | .                        | 4.85    | 8.09    | F0: 28.10<br>F1: 28.76<br>F2: 19.61<br>F3: 18.95<br>F4: 4.58 | .               |
| 4        | Bourliere 2012      | 47.2      | 61.91          | 21.00     | 5.91                     | 100.00       | .                           | GT1: 52.1<br>GT2: 12.3<br>GT3: 24.9<br>GT4: 8.1 | IDU: 39.2<br>BT: 2.2<br>SP: .     | 24.40                    | 5.18    | 1.11    | F0: 8.36<br>F1: 25.08<br>F2: 31.72<br>F3: 17.78<br>F4: 17.06 | .               |
| 5        | Contreras 2007      | 43.5      | 46.88          | 10.32     | 35.94                    | .            | .                           | GT1: .<br>GT2: .<br>GT3: .<br>GT4: .            | IDU: 0.0<br>BT: 100<br>SP: 0.0    | .                        | .       | 0.00    | F0: 31.25<br>F1: 23.44<br>F2: 29.69<br>F3: 10.94<br>F4: 4.69 | 68.58           |
| 6        | Delgado-Borego 2010 | 14.8      | 51.00          | 12.00     | 0.00                     | 100.00       | .                           | GT1: 88.2<br>GT2: 3.9<br>GT3: 6.9<br>GT4: 1.0   | IDU: 2.0<br>BT: 4.0<br>SP: 15.0   | .                        | .       | .       | F0: 8.80<br>F1: 52.00<br>F2: 15.70<br>F3: 20.60<br>F4: 2.90  | .               |
| 7        | Forestier 2012      | 54.0      | 53.06          | 13.00     | .                        | 100.00       | 6.58                        | GT1: 84.7<br>GT2: 3.1<br>GT3: 9.2<br>GT4: 3.1   | IDU: .<br>BT: .<br>SP: .          | 26.00                    | .       | .       | F0: 6.67<br>F1: 33.3<br>F2: 31.11<br>F3: 13.33<br>F4: 15.56  | 59.00           |

## Supplementary Materials

| Study ID | Study                | Age (yrs) | Gender (%Male) | DOI (yrs) | **Excess alcohol use (%) | HCV RNA+ (%) | HCV RNA load (log 10 IU/ml) | Genotype (%)                                   | Mode of Infection (%)             | BMI (kg/m <sup>2</sup> ) | HIV (%) | HBV (%) | METAVIR (%)                                                   | Mean ALT (IU/L) |
|----------|----------------------|-----------|----------------|-----------|--------------------------|--------------|-----------------------------|------------------------------------------------|-----------------------------------|--------------------------|---------|---------|---------------------------------------------------------------|-----------------|
| 8        | Goodman 2008         | 9.8       | 56.20          | 9.80      | 0.00                     | 100.00       | .                           | GT1: 82.6<br>GT2: 5.8<br>GT3: 10.7<br>GT4: .   | IDU: 0.0<br>BT: 7.4<br>SP: 14.9   | 20.3                     | 0.00    | 0.00    | F0: 14.05<br>F1: 45.45<br>F2: 34.71<br>F3: 4.13<br>F4: 1.65   | .               |
| 9        | Hui 2007             | 53.7      | 82.93          | 38.00     | .                        | 100.00       | 5.81                        | GT1: 37.8<br>GT2: 7.3<br>GT3: 6.1<br>GT4: .    | IDU: 43.9<br>BT: 34.2<br>SP: 22.0 | 27.94                    | 0.00    | 0.00    | F0: 28.30<br>F1: 30.19<br>F2: 13.21<br>F3: 13.21<br>F4: 15.09 | 33.49           |
| 10a      | Liu 2014 - Marijuana | 43.9      | 77.50          | 14.69     | 27.45                    | 100.00       | 2.70                        | GT1: 81.2<br>GT2: 4.0<br>GT3: 14.9<br>GT4: 0.0 | IDU: 74.0<br>BT: .<br>SP: .       | .                        | 8.85    | .       | F0: 11.9<br>F1: 22.8<br>F2: 38.60<br>F3: 15.80<br>F4: 10.90   | 90.30           |
| 10b      | Liu 2014 - Marijuana | 46.7      | 67.60          | 18.01     | 11.64                    | 100.00       | 2.31                        | GT1: 67.3<br>GT2: 9.5<br>GT3: 14.5<br>GT4: 6.2 | IDU: 53.1<br>BT: .<br>SP: .       | .                        | 1.09    | .       | F0: 7.30<br>F1: 26.9<br>F2: 37.8<br>F3: 6.40<br>F4: 11.60     | 98.00           |
| 11       | Nanda 2012           | 59.0      | 0.00           | 30.00     | .                        | 100.00       | .                           | GT1: 100<br>GT2: 0.0<br>GT3: 0.0<br>GT4: 0.0   | IDU: .<br>BT: 0.0<br>SP: .        | 25.30                    | .       | .       | F0: 50.00<br>F1: 25.00<br>F2: 10.00<br>F3: 5.00<br>F4: 10.00  | .               |
| 12       | Rao 2012             | 53.7      | 44.83          | 25.20     | 21.26                    | 100.00       | 6.22                        | GT1: 75.6<br>GT2: 11.2<br>GT3: .<br>GT4: .     | IDU: 0.0<br>BT: 100<br>SP: 0.0    | .                        | 0.00    | 1.44    | F0: 25.71<br>F1: 25.14<br>F2: 17.71<br>F3: 14.29<br>F4: 17.14 | 45.80           |
| 13a      | Siddiqui 2008        | 50.0      | 56.61          | 22.50     | .                        | 84.00        | .                           | GT1: 57.5<br>GT2: 3.2<br>GT3: 0.9<br>GT4: 0.4  | IDU: 52.6<br>BT: 14.2<br>SP: 20.3 | .                        | .       | 2.80    | F0: 17.74<br>F1: 27.16<br>F2: 17.84<br>F3: 15.66<br>F4: 21.61 | 66.00           |
| 13b      | Siddiqui 2008        | 45.3      | 60.55          | 22.50     | .                        | 82.00        | .                           | GT1: 42.5<br>GT2: 6.5<br>GT3: 9.9<br>GT4: 1.3  | IDU: 45.3<br>BT: 16.9<br>SP: 25.3 | .                        | .       | 3.41    | F0: 18.26<br>F1: 23.31<br>F2: 17.42<br>F3: 13.20<br>F4: 27.81 | 77.00           |

Supplementary Table 8 continued

## Supplementary Materials

| Study ID | Study         | Age (yrs) | Gender (%Male) | DOI (yrs) | **Excess alcohol use (%) | HCV RNA+ (%) | HCV RNA load (log 10 IU/ml) | Genotype (%)                                    | Mode of Infection (%)          | BMI (kg/m <sup>2</sup> ) | HIV (%) | HBV (%) | METAVIR (%)                                                   | Mean ALT (IU/L) |
|----------|---------------|-----------|----------------|-----------|--------------------------|--------------|-----------------------------|-------------------------------------------------|--------------------------------|--------------------------|---------|---------|---------------------------------------------------------------|-----------------|
| 14       | Werner 2010   | 49.1      | 72.73          | 4.43      | .                        | 100.00       | 6.12                        | GT1: 72.7<br>GT2: 13.6<br>GT3: 13.6<br>GT4: 0.0 | IDU: .<br>BT: .<br>SP: .       | .                        | .       | .       | F0: 27.27<br>F1: 40.91<br>F2: 18.18<br>F3: 9.09<br>F4: 4.55   | .               |
| 15a      | Bochud 2009   | 42.0      | 60.00          | 21.00     | 55.02                    | 100.00       | 6.00                        | GT1: 100<br>GT2: 0.0<br>GT3: 0.0<br>GT4: 0.0    | IDU: 49.0<br>BT: 22.0<br>SP: . | 23.90                    | 7.00    | 0.00    | F0: 14.0<br>F1: 37.0<br>F2: 27.0<br>F3: 11.0<br>F4: 11.0      | 66.00           |
| 15b      | Bochud 2009   | 54.0      | 48.00          | 24.00     | 37.78                    | 100.00       | 5.93                        | GT1: 0.0<br>GT2: 100<br>GT3: 0.0<br>GT4: 0.0    | IDU: 11.0<br>BT: 53.0<br>SP: . | 24.90                    | 2.00    | 0.00    | F0: 14.00<br>F1: 27.00<br>F2: 31.00<br>F3: 16.00<br>F4: 12.00 | 45.00           |
| 15c      | Bochud 2009   | 40.0      | 65.00          | 20.00     | 63.14                    | 100.00       | 5.90                        | GT1: 0.0<br>GT2: 0.0<br>GT3: 100<br>GT4: 0.0    | IDU: 66.0<br>BT: 9.0<br>SP: .  | 23.30                    | 7.00    | 0.00    | F0: 10.00<br>F1: 28.00<br>F2: 32.00<br>F3: 11.00<br>F4: 19.00 | 76.00           |
| 15d      | Bochud 2009   | 41.0      | 66.00          | 22.00     | 56.41                    | 100.00       | 5.80                        | GT1: 0.0<br>GT2: 0.0<br>GT3: 0.0<br>GT4: 100    | IDU: 60.0<br>BT: 11.0<br>SP: . | 23.70                    | 7.00    | 0.00    | F0: 17.00<br>F1: 32.00<br>F2: 26.00<br>F3: 10.00<br>F4: 15.00 | 63.00           |
| 16       | Hissar 2009   | 41.6      | 65.26          | 12.10     | 0.00                     | 100.00       | 4.80                        | GT1: 11.7<br>GT2: .<br>GT3: 49.3<br>GT4: 4.7    | IDU: 0.5<br>BT: 76.1<br>SP: .  | .                        | 0.00    | 0.00    | F0: 4.69<br>F1: 25.35<br>F2: 23.94<br>F3: 24.88<br>F4: 21.13  | 118.50          |
| 17       | Kallwitz 2010 | 49.6      | 61.00          | 26.50     | .                        | 100.00       | .                           | GT1: .<br>GT2: .<br>GT3: .<br>GT4: .            | IDU: 36.5<br>BT: 33.5<br>SP: . | 30.10                    | 0.00    | 0.00    | F0: 10.0<br>F1: 10.0<br>F2: 22.50<br>F3: 22.50<br>F4: 35.00   | .               |
| 18       | Kielland 2014 | 37.3      | 74.5           | 17.75     | .                        | 100.00       | .                           | GT1: .<br>GT2: .<br>GT3: .<br>GT4: .            | IDU: 100<br>BT: 0.0<br>SP: 0.0 | .                        | 0.98    | 4.90    | F0: 11.48<br>F1: 68.85<br>F2: 3.28<br>F3: 4.92<br>F4: 11.48   | .               |

Supplementary Table 8 continued



## Supplementary Materials

| Study ID | Study                  | Age (yrs) | Gender (%Male) | DOI (yrs) | **Excess alcohol use (%) | HCV RNA+ (%) | HCV RNA load (log 10 IU/ml) | Genotype (%)                                    | Mode of Infection (%)          | BMI (kg/m <sup>2</sup> ) | HIV (%) | HBV (%) | METAVIR (%)                                                   | Mean ALT (IU/L) |
|----------|------------------------|-----------|----------------|-----------|--------------------------|--------------|-----------------------------|-------------------------------------------------|--------------------------------|--------------------------|---------|---------|---------------------------------------------------------------|-----------------|
| 19a      | Larsen 2010            | 39.0      | 75.00          | 18.00     | 42.62                    | 100.00       | .                           | GT1: 0.0<br>GT2: 0.0<br>GT3: 100<br>GT4: 0.0    | IDU: .<br>BT: .<br>SP: .       | .                        | 4.36    | 1.95    | F0: 6.31<br>F1: 34.34<br>F2: 28.28<br>F3: 15.66<br>F4: 15.40  | .               |
| 19b      | Larsen 2010            | 40.0      | 75.00          | 19.00     | 43.61                    | 100.00       | .                           | GT1: 77.5<br>GT2: 5.9<br>GT3: 0.0<br>GT4: 16.4  | IDU: .<br>BT: .<br>SP: .       | .                        | 7.05    | 2.06    | F0: 8.30<br>F1: 46.62<br>F2: 27.05<br>F3: 9.63<br>F4: 8.40    | .               |
| 20a      | Lawson 2010            | 36.0      | 47.00          | 14.00     | 35.63                    | 100.00       | .                           | GT1: 29.9<br>GT2: 8.1<br>GT3: 26.4<br>GT4: .    | IDU: 74.7<br>BT: 12.6<br>SP: . | 22.70                    | 0.00    | 0.00    | F0: 58.32<br>F1: 25.35<br>F2: 7.61<br>F3: 2.54<br>F4: 5.07    | .               |
| 20b      | Lawson 2010            | 36.0      | 71.00          | 14.00     | 40.44                    | 100.00       | .                           | GT1: 30.9<br>GT2: 6.1<br>GT3: 33.8<br>GT4: .    | IDU: 65.4<br>BT: 11.4<br>SP: . | 25.00                    | 0.00    | 3.16    | F0: 37.02<br>F1: 22.01<br>F2: 10.01<br>F3: 13.95<br>F4: 17.00 | .               |
| 21       | Marabita 2011          | 47.0      | 52.23          | 25.00     | 0.00                     | 100.00       | .                           | GT1: 52.2<br>GT2: 30.0<br>GT3: 13.8<br>GT4: 4.1 | IDU: 23.5<br>BT: 74.9<br>SP: . | 25.30                    | 0.00    | 0.00    | F0: 0.81<br>F1: 30.36<br>F2: 32.39<br>F3: 20.24<br>F4: 16.19  | .               |
| 22a      | Patin 2012-French coh. | 48.2      | 44.75          | 20.17     | 14.56                    | .            | .                           | GT1: 63.0<br>GT2: 8.8<br>GT3: 16.1<br>GT4: 2.1  | IDU: 33.6<br>BT: 43.9<br>SP: . | .                        | 0.00    | 0.00    | F0: 8.78<br>F1: 52.25<br>F2: 4.28<br>F3: 19.91<br>F4: 14.78   | .               |
| 22b      | Patin 2012-Swiss coh.  | 43.6      | 62.39          | 22.39     | 19.02                    | .            | .                           | GT1: 52.2<br>GT2: 9.7<br>GT3: 27.8<br>GT4: 6.8  | IDU: 41.8<br>BT: 19.2<br>SP: . | .                        | 0.00    | 0.00    | F0: 12.54<br>F1: 35.34<br>F2: 31.27<br>F3: 0.98<br>F4: 19.87  | .               |
| 22c      | Patin 2012-US/France   | 48.0      | 60.31          | 23.48     | 11.88                    | 100.00       | .                           | GT1: 67.2<br>GT2: 5.3<br>GT3: 16.9<br>GT4: 4.4  | IDU: 7.8<br>BT: 4.7<br>SP: .   | .                        | 0.00    | 0.00    | F0: 12.81<br>F1: 35.63<br>F2: 21.88<br>F3: 19.06<br>F4: 10.63 | .               |

Supplementary Table 8 continued

## Supplementary Materials

| Study ID | Study                    | Age (yrs) | Gender (%Male) | DOI (yrs) | **Excess alcohol use (%) | HCV RNA+ (%) | HCV RNA load (log 10 IU/ml) | Genotype (%)                                    | Mode of Infection (%)            | BMI (kg/m <sup>2</sup> ) | HIV (%) | HBV (%) | METAVIR (%)                                                   | Mean ALT (IU/L) |
|----------|--------------------------|-----------|----------------|-----------|--------------------------|--------------|-----------------------------|-------------------------------------------------|----------------------------------|--------------------------|---------|---------|---------------------------------------------------------------|-----------------|
| 22d      | Patin 2012-International | 45.8      | 40.65          | 16.96     | .                        | 100.00       | .                           | GT1: .<br>GT2: .<br>GT3: .<br>GT4: .            | IDU: 20.6<br>BT: 5.1<br>SP: .    | .                        | 0.00    | 0.00    | F0: 17.45<br>F1: 38.47<br>F2: 25.23<br>F3: 10.12<br>F4: 8.72  | .               |
| 22e      | Patin 2012-Australian    | 62.4      | 70.78          | 20.20     | .                        | 100.00       | .                           | GT1: 100<br>GT2: 0.0<br>GT3: 0.0<br>GT4: 0.0    | IDU: 0<br>BT: 0<br>SP: .         | .                        | 0.00    | 0.00    | F0: 5.94<br>F1: 29.68<br>F2: 33.33<br>F3: 14.61<br>F4: 16.44  | .               |
| 23       | Brescini 2014            | 45.0      | 62.37          | 6.25      | 15.05                    | .            | 5.76                        | GT1: 48.9<br>GT2: 12.4<br>GT3: 24.7<br>GT4: 4.3 | IDU: 47.9<br>BT: .<br>SP: .      | .                        | 0.00    | 0.00    | F0: 30.11<br>F1: 30.65<br>F2: 16.13<br>F3: 9.14<br>F4: 13.98  | 58.00           |
| 24       | de Ledinghen 2008        | 52.8      | 38.41          | 23.50     | 0.00                     | 100.00       | 5.83                        | GT1: 60.4<br>GT2: 20.1<br>GT3: 8.8<br>GT4: 9.5  | IDU: 16.0<br>BT: 33.8<br>SP: .   | .                        | 0.00    | 0.00    | F0: 34.60<br>F1: 34.45<br>F2: 13.41<br>F3: 7.16<br>F4: 10.37  | 59.00           |
| 25       | Nunnari 2010             | 52.5      | 57.14          | 12.40     | .                        | 100.00       | 2.80                        | GT1: 71.4<br>GT2: 14.3<br>GT3: 14.3<br>GT4: 0.0 | IDU: .<br>BT: .<br>SP: .         | .                        | 0.00    | 0.00    | F0: 14.29<br>F1: 14.29<br>F2: 28.57<br>F3: 28.57<br>F4: 14.29 | 97.40           |
| 26       | Mazzocato 2014           | 48.0      | 58.26          | 6.00      | 18.26                    | .            | .                           | GT1: 38.3<br>GT2: 18.3<br>GT3: 13.9<br>GT4: 2.6 | IDU: 32.2<br>BT: .<br>SP: .      | .                        | 0.00    | 0.00    | F0: 35.65<br>F1: 34.78<br>F2: 9.57<br>F3: 4.35<br>F4: 15.65   | 56.00           |
| 27       | Suarez-Zarracina 2012    | 46.5      | 61.76          | 23.00     | 64.71                    | 100.00       | 5.87                        | GT1: 82.4<br>GT2: 1.5<br>GT3: 11.8<br>GT4: 2.9  | IDU: 48.5<br>BT: 50.0<br>SP: 0.0 | .                        | 0.00    | 0.00    | F0: 16.18<br>F1: 16.18<br>F2: 22.06<br>F3: 25.00<br>F4: 20.59 | 85.50           |
| 28       | White 2012               | 57.0      | 100.00         | 34.00     | 34.09                    | 100.00       | 6.35                        | GT1: 85.7<br>GT2: 8.4<br>GT3: 4.5<br>GT4: 0.6   | IDU: 50.7<br>BT: 17.5<br>SP: .   | .                        | 0.00    | 0.00    | F0: 7.14<br>F1: 12.66<br>F2: 21.43<br>F3: 26.95<br>F4: 31.82  | .               |

Supplementary Table 8 continued

## Supplementary Materials

| Study ID | Study          | Age (yrs) | Gender (%Male) | DOI (yrs) | **Excess alcohol use (%) | HCV RNA+ (%) | HCV RNA load (log 10 IU/ml) | Genotype (%)                                    | Mode of Infection (%)             | BMI (kg/m <sup>2</sup> ) | HIV (%) | HBV (%) | METAVIR (%)                                                  | Mean ALT (IU/L) |
|----------|----------------|-----------|----------------|-----------|--------------------------|--------------|-----------------------------|-------------------------------------------------|-----------------------------------|--------------------------|---------|---------|--------------------------------------------------------------|-----------------|
| 29       | Reggiardo 2012 | 52.5      | 37.50          | 21.50     | 32.50                    | 100          | .                           | GT1: 50.0<br>GT2: 37.5<br>GT3: 12.5<br>GT4: 0.0 | IDU: 0.0<br>BT: 100<br>SP: 0.0    | .                        | 0.00    | 0.00    | F0: 20.00<br>F1: 42.50<br>F2: 15.00<br>F3: 20.00<br>F4: 2.50 | .               |
| 30       | Liu 2014       | 33.6      | 43.75          | 10.22     | .                        | .            | 6.22                        | GT1: 69.8<br>GT2: .<br>GT3: .<br>GT4: .         | IDU: 0.0<br>BT: 100<br>SP: 0.0    | .                        | .       | 1.04    | F0: 33.65<br>F1: 42.31<br>F2: 13.46<br>F3: 5.77<br>F4: 3.85  | 116.00          |
| 31a      | Terrault 2008  | 46.6      | 64.33          | 25.50     | 0.00                     | 100.00       | .                           | GT1: 100<br>GT2: 0.0<br>GT3: 0.0<br>GT4: 0.0    | IDU: 61.8<br>BT: 26.8<br>SP: 0.0  | .                        | 0.00    | 0.00    | F0: 8.00<br>F1: 26.00<br>F2: 25.50<br>F3: 31.00<br>F4: 9.00  | 110.40          |
| 31b      | Terrault 2008  | 47.9      | 66.43          | 24.00     | 0.00                     | 100.00       | .                           | GT1: 100<br>GT2: 0.0<br>GT3: 0.0<br>GT4: 0.0    | IDU: 57.3<br>BT: 23.1<br>SP: 0.0  | .                        | 0.00    | 0.00    | F0: 9.00<br>F1: 29.50<br>F2: 29.50<br>F3: 28.00<br>F4: 4.00  | 66.00           |
| 32       | Guyader 2007   | 41.6      | 58.00          | 16.00     | 36.00                    | 100.00       | .                           | GT1: 39.5<br>GT2: 6.8<br>GT3: 15.0<br>GT4: .    | IDU: 33.0<br>BT: 34.0<br>SP: 33.0 | 23.00                    | 0.00    | 0.00    | F0: 30.00<br>F1: 33.00<br>F2: 17.00<br>F3: 8.00<br>F4: 11.00 | .               |
| 33       | Pradat 2007    | 39.5      | 63.97          | 14.50     | 15.38                    | 100.00       | .                           | GT1: 35.6<br>GT2: .<br>GT3: .<br>GT4: .         | IDU: .<br>BT: .<br>SP: .          | .                        | .       | .       | F0: 3.24<br>F1: 37.25<br>F2: 25.10<br>F3: 25.51<br>F4: 8.91  | .               |
| 34a      | Castera 2004   | 34.4      | 83.78          | 12.10     | .                        | 100.00       | 9.30                        | GT1: 0.0<br>GT2: 0.0<br>GT3: 100<br>GT4: 0.0    | IDU: 65.0<br>BT: 16.0<br>SP: 19.0 | 18.10                    | 0.00    | 0.00    | F0: 24.50<br>F1: 24.50<br>F2: 30.0<br>F3: 10.50<br>F4: 10.50 | 118.00          |
| 34b      | Castera 2004   | 45.7      | 70.18          | 15.60     | .                        | 100.00       | 6.10                        | GT1: 78.9<br>GT2: 15.0<br>GT3: 0.0<br>GT4: 3.1  | IDU: 14.0<br>BT: 41.0<br>SP: 45.0 | 32.90                    | 0.00    | 0.00    | F0: 28.50<br>F1: 28.50<br>F2: 26.0<br>F3: 8.50<br>F4: 8.50   | 143.00          |

Supplementary Table 8 continued

## Supplementary Materials

| Study ID | Study             | Age (yrs) | Gender (%Male) | DOI (yrs) | **Excess alcohol use (%) | HCV RNA+ (%) | HCV RNA load (log 10 IU/ml) | Genotype (%)                                     | Mode of Infection (%)             | BMI (kg/m <sup>2</sup> ) | HIV (%) | HBV (%) | METAVIR (%)                                                   | Mean ALT (IU/L) |
|----------|-------------------|-----------|----------------|-----------|--------------------------|--------------|-----------------------------|--------------------------------------------------|-----------------------------------|--------------------------|---------|---------|---------------------------------------------------------------|-----------------|
| 35a      | Mathurin 1998     | 43.0      | 40.20          | 14.90     | 10.78                    | 65.00        | .                           | GT1: 43.1<br>GT2: 7.8<br>GT3: 4.9<br>GT4: 1.0    | IDU: 32.0<br>BT: 35.0<br>SP: .    | .                        | 0.00    | 0.00    | F0: 29.85<br>F1: 52.24<br>F2: 10.45<br>F3: 2.99<br>F4: 4.48   | 24.50           |
| 35b      | Mathurin 1998     | 44.0      | 40.20          | 14.10     | 10.78                    | 80.00        | .                           | GT1: 45.1<br>GT2: 4.9<br>GT3: 11.8<br>GT4: 3.9   | IDU: 31.0<br>BT: 40.0<br>SP: .    | .                        | 0.00    | 0.00    | F0: 5.94<br>F1: 37.62<br>F2: 35.64<br>F3: 9.00<br>F4: 10.89   | 140.00          |
| 36       | Bruden, 2017      | 41.2      | 4864           | 18.60     | 8.85                     | 100.00       | .                           | GT1:68.80<br>GT2:14.74<br>GT3:13.27<br>GT4: 0.41 | IDU: 58.7<br>BT: 14.0<br>SP: 27.3 | .                        | 0.00    | 0.00    | F0: 18.43<br>F1: 18.42<br>F2: 32.19<br>F3: 21.62<br>F4: 9.34  | .               |
| 37       | Cepeda, 2016      | 41.6      | 100.00         | 16.90     | 67.97                    | 100.00       | .                           | GT1: .<br>GT2: .<br>GT3: .<br>GT4: .             | IDU: 100<br>BT: 0.0<br>SP: 0.0    | 19.80                    | 30.25   | 4.62    | F0: 22.42<br>F1: 22.78<br>F2: 14.23<br>F3: 14.23<br>F4: 26.33 | 49.00           |
| 38       | Cepeda, 2017      | 49.0      | 71.58          | 27.50     | 26.21                    | 100.00       | 6.40                        | GT1: .<br>GT2: .<br>GT3: .<br>GT4: .             | IDU: 100<br>BT: 0.0<br>SP: 0.0    | .                        | 34.96   | .       | F0: 31.33<br>F1: 31.33<br>F2: 11.31<br>F3: 11.31<br>F4: 14.73 | .               |
| 39       | Sakellariou, 2014 | 45.7      | 60.66          | 4.20      | 0.00                     | 100.00       | 5.06                        | GT1: 27.9<br>GT2: 1.6<br>GT3: 23.0<br>GT4: 14.8  | IDU: .<br>BT: .<br>SP: .          | .                        | 0.00    | 0.00    | F0: 25.86<br>F1: 60.34<br>F2: 5.17<br>F3: 5.17<br>F4: 3.45    | .               |
| 40a      | Lemos, 2007 A     | 57.0      | 64.10          | 22.00     | 0.00                     | 100.00       | .                           | GT1: .<br>GT2: .<br>GT3: .<br>GT4: .             | IDU: 0 .0<br>BT: 69.2<br>SP: 0.0  | .                        | 0.00    | 0.00    | F0: 12.82<br>F1: 14.10<br>F2: 24.36<br>F3: 23.08<br>F4: 23.10 | .               |
| 40b      | Lemos, 2007 B     | 45.0      | 62.39          | 6.00      | 0.00                     | 100.00       | .                           | GT1: .<br>GT2: .<br>GT3: .<br>GT4: .             | IDU: 0.0<br>BT: 25.6<br>SP: 0.0   | .                        | 0.00    | 0.00    | F0: 41.88<br>F1: 41.88<br>F2: 6.84<br>F3: 6.84<br>F4: 2.6     | .               |

## Supplementary Materials

**Supplementary Table 8 continued**

| Study ID | Study              | Age (yrs) | Gender (%Male) | DOI (yrs) | **Excess alcohol use (%) | HCV RNA+ (%) | HCV RNA load (log 10 IU/ml) | Genotype (%)                                    | Mode of Infection (%)             | BMI (kg/m <sup>2</sup> ) | HIV (%) | HBV (%) | METAVIR (%)                                                   | Mean ALT (IU/L) |
|----------|--------------------|-----------|----------------|-----------|--------------------------|--------------|-----------------------------|-------------------------------------------------|-----------------------------------|--------------------------|---------|---------|---------------------------------------------------------------|-----------------|
| 41       | Delladetsima, 2013 | 42.7      | 60.87          | 4.40      | .                        | 87.00        | 3.50                        | GT1: 47.8<br>GT2: 0.0<br>GT3: 26.1<br>GT4: 13.0 | IDU: .<br>BT: .<br>SP: .          | .                        | .       | .       | F0: 47.83<br>F1: 60.87<br>F2: 8.70<br>F3: 4.35<br>F4: 4.35    | .               |
| 42       | Besheer, 2017      | 49.5      | 63.11          | 19.00     | .                        | 100.00       | 5.79                        | GT1: .<br>GT2: .<br>GT3: .<br>GT4: .            | IDU: .<br>BT: .<br>SP: .          | .                        | .       | .       | F0: 5.73<br>F1: 18.85<br>F2: 19.67<br>F3: 25.41<br>F4: 30.33  | 55.50           |
| 43       | Midgard, 2017      | 41.0      | 82.80          | 21.00     | 16.13                    | 100.00       | .                           | GT1: .<br>GT2: .<br>GT3: .<br>GT4: .            | IDU: 100<br>BT: 0.0<br>SP: 0.0    | .                        | 0.00    | 0.00    | F0: 33.33<br>F1: 34.41<br>F2: 10.75<br>F3: 10.75<br>F4: 10.75 | .               |
| 44       | Chen, 2017         | 37.0      | 69.47          | 17.00     | .                        | 100.00       | 6.10                        | GT1: .<br>GT2: .<br>GT3: .<br>GT4: .            | IDU: 31.3<br>BT: 16.8<br>SP: 18.3 | 25.20                    | 0.00    | 0.00    | F0: 31.30<br>F1: 32.82<br>F2: 15.27<br>F3: 7.63<br>F4: 12.98  | 94.00           |
| 45       | Valva, 2014        | 51.0      | 65.63          | 20.00     | .                        | 100.00       | 5.74                        | GT1: .<br>GT2: .<br>GT3: .<br>GT4: .            | IDU: 21.9<br>BT: 12.5<br>SP: 62.5 | .                        | 0.00    | 0.00    | F0: 15.63<br>F1: 15.63<br>F2: 31.25<br>F3: 31.25<br>F4: 6.25  | 67.00           |

**Supplementary Table 8 continued**

Supplementary Table 4. Table summarizing patient characteristics for all 45 studies identified by the updated systematic review. Abbreviations: HCV: Hepatitis C virus; DOI: duration of infection; ALT: alanine aminotransferase; BMI: body mass index; HIV: Human immunodeficiency virus; HBV: Hepatitis B virus; GT: genotype BT: blood transfusion; IDU: intravenous drug use; SP: Sporadic risk. N

## Supplementary Materials

### List of 45 studies identified by updated systematic review ordered by study ID:

1. Agostini, H., Castera, L., Melin, P., Cattan, L. & Roudot-Thoraval, F. HEPACOM: multicenter, observational prospective study of outcome and monitoring of HCV positive antiviral-naive patients managed in the French health care system. *Gastroenterologie clinique et biologique* **31**, 1074–1080 (2007).
2. Allison, R. D. *et al.* A 25-year study of the clinical and histologic outcomes of hepatitis C virus infection and its modes of transmission in a cohort of initially asymptomatic blood donors. **206**, 654–661 (2012).
3. Boonwaat, L., Haber, P. S., Levy, M. H. & Lloyd, A. R. Establishment of a successful assessment and treatment service for Australian prison inmates with chronic hepatitis C. *Med J Aust* **192**, 496–500 (2010).
4. Bourliere, M. *et al.* Pegylated interferon-alpha2a plus ribavirin for chronic hepatitis C in a real-life setting: the Hepatys French cohort (2003-2007). *Antivir Ther* **17**, 101–110 (2012).
5. Contreras, A. M. *et al.* End-stage renal disease and hepatitis C infection: comparison of alanine aminotransferase levels and liver histology in patients with and without renal damage. *Annals of hepatology* **6**, 48–54 (2007).
6. Delgado-Borrego, A. *et al.* Influence of body mass index on outcome of pediatric chronic hepatitis C virus infection. *J Pediatr Gastroenterol Nutr* **51**, 191–197 (2010).
7. Forestier, N. *et al.* Acoustic radiation force impulse imaging for evaluation of antiviral treatment response in chronic hepatitis C. *J. Gastrointest. Liver Dis.* **21**, 367–373 (2012).
8. Goodman, Z. D. *et al.* Pathology of chronic hepatitis C in children: liver biopsy findings in the Peds-C Trial. *Hepatology* **47**, 836–843 (2008).
9. Hui, C.-K. *et al.* Disease progression in Chinese chronic hepatitis C patients with persistently normal alanine aminotransaminase levels. *Alimentary pharmacology & therapeutics* **25**, 1283–1292 (2007).
10. Liu, T. *et al.* Marijuana use in hepatitis C infection does not affect liver biopsy histology or treatment outcomes. **28**, 381–384 (2014).
11. Nanda, K. S. *et al.* Elevated circulating osteoprotegerin and reduced matrix-metalloprotease-9 in post-menopausal women with chronic Hepatitis C virus infection. *Cytokine* **60**, 328–333 (2012).
12. Rao, H.-Y. *et al.* Outcome of hepatitis C virus infection in Chinese paid plasma donors: a 12-19-year cohort study. *Journal of gastroenterology and hepatology* **27**, 526–532 (2012).
13. Siddiqui, F. A. *et al.* Demographics of a large cohort of urban chronic hepatitis C patients. *Hepatology international* **2**, 376–381 (2008).
14. Werner, T. *et al.* Treatment of hepatitis C in renal transplantation candidates: a single-center experience. *Transplantation* **90**, 407–411 (2010).
15. Bochud, P.-Y. *et al.* Genotype 3 is associated with accelerated fibrosis progression in chronic hepatitis C. *J. Hepatol.* **51**, 655–66 (2009).
16. Hissar, S. S. *et al.* Natural history of hepatic fibrosis progression in chronic hepatitis C virus infection in India. *J Gastroenterol Hepatol* **24**, 581–587 (2009).

## Supplementary Materials

17. Kallwitz, E. R. *et al.* Ethnicity and body mass index are associated with hepatitis C presentation and progression. *Clin Gastroenterol Hepatol* **8**, 72–78 (2010).
18. Kielland, K. B. *et al.* Liver fibrosis progression at autopsy in injecting drug users infected by hepatitis C: a longitudinal long-term cohort study. *J Hepatol* **60**, 260–266 (2014).
19. Larsen, C. *et al.* Hepatitis C virus genotype 3 and the risk of severe liver disease in a large population of drug users in France. *J Med Virol* **82**, 1647–1654 (2010).
20. Lawson, A. & Trent Hepatitis, C. S. G. Hepatitis C virus-infected patients with a persistently normal alanine aminotransferase: do they exist and is this really a group with mild disease? *J Viral Hepat* **17**, 51–58 (2010).
21. Marabita, F. *et al.* Genetic variation in the interleukin-28B gene is not associated with fibrosis progression in patients with chronic hepatitis C and known date of infection. *Hepatology* **54**, 1127–1134 (2011).
22. Patin, E. *et al.* Genome-wide association study identifies variants associated with progression of liver fibrosis from HCV infection. *Gastroenterology* **143**, 1212–1244 (2012).
23. Brescini, L. *et al.* Evaluating Liver Fibrosis by Transient Elastometry in Patients With HIV-HCV Coinfection and Mono-infection. *Hepat. Mon.* **14**, e15426 (2014).
24. de Lédighen, V. *et al.* Liver fibrosis on account of chronic hepatitis C is more severe in HIV-positive than HIV-negative patients despite antiretroviral therapy. *J. Viral Hepat.* **15**, 427–33 (2008).
25. Nunnari, G. Circulating fibrocytes as a marker of liver fibrosis in chronic hepatitis C. *Front. Biosci.* **E2**, 1241 (2010).
26. Mazzocato, S. *et al.* Comparison of liver fibrosis progression in HIV / HCV co-infected and HCV mono-infected patients by transient elastometry. **39**, 797–802 (2014).
27. Suárez-Zarracina, T. *et al.* Didanosine (ddl) associates with increased liver fibrosis in adult HIV-HCV coinfecting patients. *J. Viral Hepat.* **19**, 685–93 (2012).
28. White, D. L. *et al.* Higher serum testosterone is associated with increased risk of advanced hepatitis C-related liver disease in males. *Hepatology* **55**, 759–68 (2012).
29. Reggiardo, M. V. *et al.* Natural history of hepatitis C virus infection in a cohort of asymptomatic post-transfused subjects. *Ann. Hepatol.* **11**, 658–66
30. Liu, S., Cheng, M., Mu, M. & Yang, Q. [Natural clearance of hepatitis C virus in 96 patients with infection acquired by blood transfusion from a single donor in Guizhou]. *Zhonghua Gan Zang Bing Za Zhi* **22**, 251–4 (2014).
31. Terrault, N. A. *et al.* Fibrosis progression in African Americans and Caucasian Americans with chronic hepatitis C. *Clin Gastroenterol Hepatol* **6**, 1403–1411 (2008).
32. Guyader, D. *et al.* Liver iron is a surrogate marker of severe fibrosis in chronic hepatitis C. *J. Hepatol.* **46**, 587–95 (2007).
33. Pradat, P., Voirin, N., Tillmann, H. L., Chevallier, M. & Trépo, C. Progression to cirrhosis in hepatitis C patients: An age-dependent process. *Liver Int.* **27**, 335–339 (2007).

## Supplementary Materials

- 1
- 2
- 3
- 4 34. Castéra, L. *et al.* Effect of antiviral treatment on evolution of liver steatosis in patients with chronic hepatitis C: indirect evidence of a role of hepatitis C virus genotype 3 in steatosis. *Gut* **53**, 420–4 (2004).
- 5
- 6 35. Mathurin, P. Slow progression rate of fibrosis in hepatitis C virus patients with persistently normal alanine transaminase activity. *Hepatology* **27**, 868–872 (1998)
- 7
- 8
- 9 36. Bruden DJ, McMahon BJ, Townshend-Bulson L, et al. Risk of End Stage Liver Disease, Hepatocellular Carcinoma and Liver-Related Death By Fibrosis Stage in the Hepatitis C Alaska Cohort. *Hepatology*. 2017. doi:10.1002/hep.29115.
- 10
- 11 37. Cepeda JA, Thomas DL, Astemborski J, Kong X, Kirk GD, Mehta SH. Liver disease progression in a community-based sample of HCV-infected PWID. *Top Antivir Med.* 2016;24 (E-1):218.
- 12
- 13 38. Cepeda JA, Thomas DL, Astemborski J, Sulkowski MS, Kirk GD, Mehta SH. Increased mortality among persons with chronic hepatitis C with moderate or severe liver disease: a cohort study. *Clin Infect Dis.* 2017;10:10. doi:https://dx.doi.org/10.1093/cid/cix207.
- 14
- 15 39. Sakellariou S, Boletis JN, Sypsa V, Psychogiou M, Tiniakos D, Delladetsima I. Histological features of chronic hepatitis C in haemodialysis patients. *Liver Int.* 2014;34(6):e56-61. doi:https://dx.doi.org/10.1111/liv.12413.
- 16
- 17 40. Lemos LB, Perez RM, Lemos MM, et al. Hepatitis C in chronic kidney disease: predialysis patients present more severe histological liver injury than hemodialysis patients? *Am J Nephrol.* 2007;27(2):191-196. doi:10.1159/000100892.
- 18
- 19 41. Delladetsima I, Psychogiou M, Sypsa V, Sakellariou S, Hatzakis A, J NB. Time of acquisition of HCV infection in renal transplant recipients: a major prognostic factor for disease progression. *Clin Transpl.* 2013;27(1):72-79. doi:10.1111/ctr.12012.
- 20
- 21 42. Besheer T, El-Bendary M, Elalfy H, et al. Prediction of Fibrosis Progression Rate in Patients with Chronic Hepatitis C Genotype 4: Role of Cirrhosis Risk Score and Host Factors. *J Interf Cytokine Res.* 2017;37(3):97-102. doi:10.1089/jir.2016.0111.
- 22
- 23 43. Midgard H, Hajarizadeh B, Cunningham EB, et al. International Journal of Drug Policy Changes in risk behaviours during and following treatment for hepatitis C virus infection among people who inject drugs : The ACTIVATE study. 2017;47:230-238. doi:10.1016/j.drugpo.2017.05.040.
- 24
- 25 44. Chen Yi Mei SLG, Thompson AJ, Christensen B, et al. Sustained virological response halts fibrosis progression : A long-term follow-up study of people with chronic hepatitis C infection. *PLoS ONE* 12(10). 2017;12(10):1-12.
- 26
- 27 45. Valva P, Gismondi MI, Casciato PC, et al. Distinctive intrahepatic characteristics of paediatric and adult pathogenesis of chronic hepatitis C infection. *Clin Microbiol Infect.* 2014;20(12):O998-O1009. doi:10.1111/1469-0691.12728.
- 28
- 29
- 30
- 31
- 32
- 33
- 34
- 35
- 36
- 37
- 38
- 39
- 40
- 41
- 42
- 43
- 44
- 45
- 46
- 47



## Supplementary Materials

**S5 Table : Summary of clinical characteristics of study subjects stratified by review update**

|                                               | Updated Review<br>(1990-2018) |      |      | Original Review<br>(1990-2007) |      |      | New Groups<br>(2007-2018) |      |      |
|-----------------------------------------------|-------------------------------|------|------|--------------------------------|------|------|---------------------------|------|------|
|                                               | N                             | Mean | SE   | N                              | Mean | SE   | N                         | Mean | SE   |
| <b>Sample size</b>                            | 131                           | 326  | 35.9 | 81                             | 315  | 43.4 | 50                        | 344  | 63.1 |
| <b>Male (%)</b>                               | 131                           | 62.0 | 1.5  | 81                             | 62.1 | 2.0  | 50                        | 61.9 | 2.1  |
| <b>Age at assessment (yrs.)</b>               | 131                           | 44.3 | 0.6  | 81                             | 44.3 | 0.5  | 50                        | 44.4 | 1.3  |
| <b>Estimated age at infection (yrs.)</b>      | 131                           | 25.8 | 0.5  | 81                             | 25.8 | 0.4  | 50                        | 25.8 | 1.3  |
| <b>Estimated duration of infection (yrs.)</b> | 131                           | 18.4 | 0.5  | 81                             | 18.5 | 0.5  | 50                        | 18.2 | 1.0  |
| <b>Cirrhosis (%)</b>                          | 131                           | 12.0 | 0.7  | 81                             | 11.3 | 0.8  | 50                        | 13.2 | 1.2  |
| <b>Steatosis (%)</b>                          | 39                            | 50.3 | 3.9  | 21                             | 48.9 | 4.4  | 18                        | 52   | 6.8  |
| <b>BMI (kg/m<sup>2</sup>)</b>                 | 49                            | 25.7 | 0.4  | 30                             | 26.1 | 0.4  | 19                        | 25   | 0.9  |
| <b>HIV (%)</b>                                | 106                           | 2.0  | 0.7  | 63                             | 1.5  | 0.8  | 43                        | 2.8  | 1.1  |
| <b>HBV (HBsAg positive, %)</b>                | 104                           | 0.4  | 0.1  | 64                             | 0.3  | 0.1  | 40                        | 0.6  | 0.3  |
| <b>Elevated ALT (%)</b>                       | 52                            | 76.2 | 4.0  | 37                             | 80.8 | 4.0  | 15                        | 65   | 9.2  |
| <b>ALT (IU/L)</b>                             | 58                            | 87.5 | 4.3  | 35                             | 94.3 | 5.9  | 23                        | 77.3 | 5.7  |
| <b>Excess alcohol use (%)</b>                 | 102                           | 19.9 | 2.1  | 67                             | 18.1 | 2.5  | 35                        | 23.2 | 3.7  |
| <b>Mode of infection</b>                      |                               |      |      |                                |      |      |                           |      |      |
| IDU (%)                                       | 110                           | 43.4 | 2.5  | 68                             | 43   | 2.8  | 42                        | 44.1 | 5.0  |
| BT (%)                                        | 107                           | 25.7 | 2.0  | 68                             | 27.1 | 2.1  | 39                        | 23.4 | 4.0  |
| Sporadic (%)                                  | 90                            | 22.4 | 2.0  | 68                             | 25.4 | 2.3  | 22                        | 13.2 | 3.8  |
| <b>HCV RNA load (log<sub>10</sub>IU/mL)</b>   | 49                            | 5.8  | 0.2  | 27                             | 6.1  | 0.2  | 22                        | 5.5  | 0.3  |
| <b>Genotype</b>                               |                               |      |      |                                |      |      |                           |      |      |
| Genotype 1 (%)                                | 113                           | 56.2 | 2.4  | 71                             | 57.2 | 2.4  | 42                        | 54.5 | 4.9  |
| Genotype 2 (%)                                | 89                            | 9.5  | 1.3  | 49                             | 8.7  | 0.9  | 40                        | 10.4 | 2.6  |
| Genotype 3 (%)                                | 95                            | 17.6 | 2.0  | 54                             | 15   | 1.3  | 41                        | 21.1 | 4.3  |
| Genotype 4 (%)                                | 70                            | 4.6  | 1.5  | 34                             | 3.4  | 0.7  | 36                        | 5.7  | 2.8  |
| <b>Racial groups</b>                          |                               |      |      |                                |      |      |                           |      |      |
| White (%)                                     | 68                            | 68.6 | 4.3  | 34                             | 67.2 | 5.2  | 34                        | 70   | 6.9  |
| Black (%)                                     | 54                            | 13.4 | 3.4  | 30                             | 15.7 | 4.4  | 24                        | 10.5 | 5.5  |
| Asian (%)                                     | 47                            | 5.4  | 3.0  | 24                             | 5.7  | 4.1  | 23                        | 5.1  | 4.3  |

Supplementary Table 5. Summary of clinical characteristics of study subjects included in the meta-analysis stratified by review update. Meta-analysis was restricted to study groups where all subjects were confirmed by HCV RNA testing (N=131). Abbreviations: BMI: body mass index; ALT: alanine aminotransferase; IDU: injection drug use; BT: blood transfusion; HCV: hepatitis C virus; HIV: human immunodeficiency virus; HBV: hepatitis B virus; HBsAg: hepatitis B surface antigen; RNA: ribonucleic acid; N: number of groups in meta-analysis reporting parameter; SE: standard error.

## Supplementary Materials

S6 Table : Hepatic fibrosis progression rates stratified by review update

|                                  | Updated Review<br>(1990-2018) |       |             |                |  | Original Review<br>(1990-2007) |       |             |                |  |
|----------------------------------|-------------------------------|-------|-------------|----------------|--|--------------------------------|-------|-------------|----------------|--|
|                                  | N                             | Mean  | 95% CI      | I <sup>2</sup> |  | N                              | Mean  | 95% CI      | I <sup>2</sup> |  |
| <b>[1] All identified groups</b> |                               |       |             |                |  |                                |       |             |                |  |
| F0 → F1                          | 171                           | 0.112 | 0.103 0.122 | 98%            |  | 111                            | 0.117 | 0.104 0.130 | 98%            |  |
| F1 → F2                          | 171                           | 0.088 | 0.080 0.097 | 98%            |  | 111                            | 0.085 | 0.075 0.096 | 98%            |  |
| F2 → F3                          | 171                           | 0.123 | 0.113 0.133 | 94%            |  | 111                            | 0.120 | 0.109 0.133 | 91%            |  |
| F3 → F4                          | 171                           | 0.120 | 0.108 0.132 | 89%            |  | 111                            | 0.116 | 0.104 0.129 | 83%            |  |
| scFPR                            | 171                           | 0.099 | 0.093 0.104 | 85%            |  | 111                            | 0.103 | 0.098 0.108 | 85%            |  |
| <b>[2] HCV RNA+ groups</b>       |                               |       |             |                |  |                                |       |             |                |  |
| F0 → F1                          | 131                           | 0.107 | 0.097 0.118 | 98%            |  | 81                             | 0.108 | 0.095 0.123 | 98%            |  |
| F1 → F2                          | 131                           | 0.082 | 0.074 0.091 | 97%            |  | 81                             | 0.076 | 0.066 0.087 | 98%            |  |
| F2 → F3                          | 131                           | 0.117 | 0.107 0.129 | 94%            |  | 81                             | 0.111 | 0.099 0.124 | 89%            |  |
| F3 → F4                          | 131                           | 0.116 | 0.104 0.131 | 89%            |  | 81                             | 0.111 | 0.098 0.125 | 83%            |  |
| scFPR                            | 131                           | 0.094 | 0.088 0.100 | 85%            |  | 81                             | 0.091 | 0.084 0.098 | 83%            |  |

Supplementary Table 6. Annual stage-specific and stage-constant fibrosis progression rates based on random effect meta-analyses of [1] all identified study groups meeting inclusion/exclusion criteria (N=171); or [2] subset of identified groups where CHC was confirmed by HCV RNA testing in all subjects (N=131) stratified by review update. Hepatic fibrosis stages were based on METAVIR fibrosis scoring system. Abbreviations: CHC: chronic hepatitis C; scFPR: stage-constant annual fibrosis progression rate (assuming constant progression over F0 to F4); I<sup>2</sup>: indicates the percentage of variability in estimates due to heterogeneity vs. sampling error; N: number of groups included in the meta-analyses.

## Supplementary Materials

S7 Table : Covariate-adjusted hepatic fibrosis progression rates for CHC subgroups

|                               | F0 → F1 |        |       | F1 → F2 |        |       | F2 → F3 |        |       | F3 → F4 |        |       | scFPR |        |       | TTC*<br>(yrs) |
|-------------------------------|---------|--------|-------|---------|--------|-------|---------|--------|-------|---------|--------|-------|-------|--------|-------|---------------|
|                               | Mean    | 95% CI |       | Mean    | 95% CI |       | Mean    | 95% CI |       | Mean    | 95% CI |       | Mean  | 95% CI |       |               |
| <b>All groups</b>             | 0.107   | 0.099  | 0.115 | 0.082   | 0.075  | 0.090 | 0.119   | 0.110  | 0.129 | 0.116   | 0.105  | 0.129 | 0.096 | 0.092  | 0.100 | 38            |
| <b>Study design</b>           |         |        |       |         |        |       |         |        |       |         |        |       |       |        |       |               |
| Cross-sectional/Retrospective | 0.110   | 0.100  | 0.122 | 0.081   | 0.072  | 0.092 | 0.119   | 0.107  | 0.132 | 0.115   | 0.100  | 0.132 | 0.096 | 0.091  | 0.101 | 39            |
| Retrospective-Prospective     | 0.101   | 0.086  | 0.118 | 0.084   | 0.069  | 0.103 | 0.119   | 0.100  | 0.141 | 0.120   | 0.097  | 0.148 | 0.097 | 0.089  | 0.105 | 39            |
| <b>Study population**</b>     |         |        |       |         |        |       |         |        |       |         |        |       |       |        |       |               |
| Females                       | 0.063   | 0.039  | 0.103 | 0.073   | 0.040  | 0.136 | 0.115   | 0.067  | 0.199 | 0.071   | 0.035  | 0.144 | 0.076 | 0.058  | 0.100 | 52            |
| Blood donors                  | 0.102   | 0.059  | 0.176 | 0.060   | 0.030  | 0.120 | 0.088   | 0.047  | 0.166 | 0.059   | 0.025  | 0.138 | 0.081 | 0.058  | 0.114 | 55            |
| Pediatric patients            | 0.233   | 0.119  | 0.459 | 0.094   | 0.041  | 0.218 | 0.114   | 0.051  | 0.254 | 0.080   | 0.023  | 0.283 | 0.151 | 0.093  | 0.245 | 36            |
| Post transfusion              | 0.131   | 0.056  | 0.305 | 0.085   | 0.030  | 0.247 | 0.125   | 0.046  | 0.341 | 0.062   | 0.015  | 0.247 | 0.116 | 0.066  | 0.204 | 44            |
| Liver clinic                  | 0.106   | 0.096  | 0.117 | 0.083   | 0.073  | 0.095 | 0.116   | 0.104  | 0.129 | 0.119   | 0.104  | 0.136 | 0.096 | 0.091  | 0.100 | 38            |
| Injection drug users          | 0.125   | 0.079  | 0.197 | 0.053   | 0.030  | 0.094 | 0.116   | 0.069  | 0.193 | 0.206   | 0.111  | 0.380 | 0.095 | 0.076  | 0.120 | 40            |
| Community                     | 0.133   | 0.085  | 0.207 | 0.098   | 0.057  | 0.171 | 0.118   | 0.076  | 0.183 | 0.145   | 0.086  | 0.242 | 0.109 | 0.091  | 0.130 | 33            |
| Dialysis patients             | 0.094   | 0.061  | 0.144 | 0.048   | 0.028  | 0.083 | 0.156   | 0.090  | 0.271 | 0.108   | 0.056  | 0.209 | 0.076 | 0.056  | 0.103 | 47            |
| Renal transplant              | 0.105   | 0.063  | 0.174 | 0.108   | 0.057  | 0.203 | 0.124   | 0.067  | 0.228 | 0.082   | 0.034  | 0.202 | 0.112 | 0.076  | 0.164 | 39            |
| Infectious diseases           | 0.082   | 0.049  | 0.137 | 0.114   | 0.059  | 0.219 | 0.151   | 0.086  | 0.266 | 0.147   | 0.075  | 0.291 | 0.095 | 0.071  | 0.126 | 34            |
| <b>Publication year</b>       |         |        |       |         |        |       |         |        |       |         |        |       |       |        |       |               |
| <2000                         | 0.070   | 0.042  | 0.117 | 0.064   | 0.034  | 0.123 | 0.112   | 0.059  | 0.213 | 0.199   | 0.091  | 0.437 | 0.073 | 0.052  | 0.101 | 44            |
| 2000 to <2005                 | 0.106   | 0.092  | 0.121 | 0.073   | 0.061  | 0.086 | 0.112   | 0.097  | 0.129 | 0.115   | 0.096  | 0.137 | 0.091 | 0.085  | 0.097 | 41            |
| 2005 to <2010                 | 0.115   | 0.099  | 0.135 | 0.092   | 0.076  | 0.112 | 0.112   | 0.095  | 0.131 | 0.110   | 0.090  | 0.134 | 0.100 | 0.092  | 0.107 | 38            |
| ≥2010                         | 0.105   | 0.087  | 0.127 | 0.092   | 0.073  | 0.116 | 0.141   | 0.116  | 0.172 | 0.120   | 0.093  | 0.153 | 0.104 | 0.095  | 0.114 | 36            |
| <b>HCV genotype</b>           |         |        |       |         |        |       |         |        |       |         |        |       |       |        |       |               |
| Genotype-1                    | 0.127   | 0.104  | 0.155 | 0.069   | 0.054  | 0.089 | 0.098   | 0.080  | 0.121 | 0.098   | 0.076  | 0.126 | 0.093 | 0.084  | 0.102 | 43            |
| Genotype non-1                | 0.082   | 0.062  | 0.108 | 0.102   | 0.071  | 0.144 | 0.160   | 0.120  | 0.215 | 0.139   | 0.097  | 0.199 | 0.099 | 0.086  | 0.113 | 35            |
| Genotype-3                    | 0.099   | 0.064  | 0.153 | 0.105   | 0.061  | 0.183 | 0.128   | 0.081  | 0.204 | 0.164   | 0.094  | 0.286 | 0.106 | 0.086  | 0.130 | 34            |
| Genotype non-3                | 0.103   | 0.090  | 0.117 | 0.082   | 0.070  | 0.096 | 0.124   | 0.108  | 0.143 | 0.113   | 0.095  | 0.133 | 0.095 | 0.089  | 0.101 | 39            |
| <b>Race</b>                   |         |        |       |         |        |       |         |        |       |         |        |       |       |        |       |               |
| White                         | 0.117   | 0.099  | 0.138 | 0.076   | 0.062  | 0.093 | 0.107   | 0.090  | 0.127 | 0.120   | 0.097  | 0.149 | 0.094 | 0.087  | 0.103 | 39            |
| Black                         | 0.074   | 0.044  | 0.122 | 0.110   | 0.059  | 0.207 | 0.146   | 0.086  | 0.248 | 0.062   | 0.032  | 0.122 | 0.096 | 0.075  | 0.123 | 46            |
| Asian                         | 0.109   | 0.052  | 0.227 | 0.103   | 0.041  | 0.261 | 0.148   | 0.062  | 0.353 | 0.295   | 0.098  | 0.891 | 0.107 | 0.067  | 0.172 | 29            |

Supplementary Table 7. Annual fibrosis progression rates adjusted for study design, population, publication year, age at HCV infection (mean: 26), duration of infection (mean: 17.6), male gender (mean: 62%), infection by IDU (mean: 43%), infection by blood transfusion (mean: 26%), excess alcohol consumption (mean: 18%), HIV positivity (mean: 2%), genotype-1 (mean: 56%), genotype-3 (mean: 17%) and race (69% White; 13% Black and 5% Asian) except the following groups: † pediatric subgroup was adjusted for age at infection at 1.4 and duration of infection at 11 years; †† female subgroup was not adjusted by the mean gender (male gender: 0%); and \*post-transfusion cohort was adjusted for the mode of infection by IDU at 0% and blood transfusion at 100%; IDU cohort was adjusted for the mode of infection by IDU at 100% and blood transfusion at 0%. Abbreviations: scFPR: stage-constant annual fibrosis progression rate (assuming constant progression over F0 to F4); \*TTC: time-to-cirrhosis (based on adjusted stage-specific annual progression rates); CHC: chronic hepatitis C; HCV: hepatitis C virus.

Supplementary Materials

S8 Table: Univariate random effects meta-regression of covariates associated with fibrosis progression

| Predictors                                    | F0→F1* |       |                   |             | F1→F2*  |       |                   |             | F2→F3* |       |                   |             | F3→F4* |       |                   |             | scFPR* |       |                   |             |
|-----------------------------------------------|--------|-------|-------------------|-------------|---------|-------|-------------------|-------------|--------|-------|-------------------|-------------|--------|-------|-------------------|-------------|--------|-------|-------------------|-------------|
|                                               | β      | SE    | P-value           | RR          | β       | SE    | P-value           | RR          | β      | SE    | P-value           | RR          | β      | SE    | P-value           | RR          | β      | SE    | P-value           | RR          |
| <b>Study setting</b>                          |        |       |                   |             |         |       |                   |             |        |       |                   |             |        |       |                   |             |        |       |                   |             |
| Clinical (ref)                                | —      | —     | —                 | 1.00        | —       | —     | —                 | 1.00        | —      | —     | —                 | 1.00        | —      | —     | —                 | 1.00        | —      | —     | —                 | 1.00        |
| Non-clinical                                  | -0.383 | 0.132 | <b>0.004</b>      | <b>0.68</b> | -0.287  | 0.137 | <b>0.039</b>      | <b>0.75</b> | -0.055 | 0.134 | 0.683             | 0.95        | -0.128 | 0.162 | 0.432             | 0.88        | -0.221 | 0.085 | <b>0.011</b>      | <b>0.80</b> |
| <b>Study design</b>                           |        |       |                   |             |         |       |                   |             |        |       |                   |             |        |       |                   |             |        |       |                   |             |
| Cross-sectional/Retrospective (ref)           | —      | —     | —                 | 1.00        | —       | —     | —                 | 1.00        | —      | —     | —                 | 1.00        | —      | —     | —                 | 1.00        | —      | —     | —                 | 1.00        |
| Retrospective-Prospective                     | -0.206 | 0.105 | 0.051             | 0.81        | -0.004  | 0.109 | 0.970             | 1.00        | -0.057 | 0.104 | 0.585             | 0.94        | -0.078 | 0.125 | 0.531             | 0.92        | -0.102 | 0.066 | 0.128             | 0.90        |
| <b>Study population</b>                       |        |       |                   |             |         |       |                   |             |        |       |                   |             |        |       |                   |             |        |       |                   |             |
| Liver clinic (ref)                            | —      | —     | —                 | 1.00        | —       | —     | —                 | 1.00        | —      | —     | —                 | 1.00        | —      | —     | —                 | 1.00        | —      | —     | —                 | 1.00        |
| Females                                       | -0.798 | 0.240 | <b>0.001</b>      | <b>0.45</b> | -0.467  | 0.252 | 0.067             | 0.63        | -0.408 | 0.245 | 0.098             | 0.67        | -0.779 | 0.313 | <b>0.014</b>      | <b>0.46</b> | -0.561 | 0.158 | <b>0.001</b>      | <b>0.57</b> |
| Blood donors                                  | -0.458 | 0.304 | 0.135             | 0.63        | -0.520  | 0.322 | 0.109             | 0.59        | -0.209 | 0.329 | 0.526             | 0.81        | -0.685 | 0.411 | 0.098             | 0.50        | -0.355 | 0.214 | 0.099             | 0.70        |
| Pediatric patients                            | 0.642  | 0.371 | 0.086             | 1.90        | 0.064   | 0.379 | 0.866             | 1.07        | -0.076 | 0.395 | 0.848             | 0.93        | -0.643 | 0.598 | 0.284             | 0.53        | 0.365  | 0.283 | 0.199             | 1.44        |
| Post-transfusion                              | -0.429 | 0.373 | 0.253             | 0.65        | -0.055  | 0.387 | 0.887             | 0.95        | 0.066  | 0.376 | 0.861             | 1.07        | -0.162 | 0.478 | 0.735             | 0.85        | -0.171 | 0.242 | 0.480             | 0.84        |
| Injecting drug users                          | 0.026  | 0.172 | 0.881             | 1.03        | -0.145  | 0.177 | 0.413             | 0.87        | 0.092  | 0.170 | 0.590             | 1.10        | 0.543  | 0.197 | <b>0.007</b>      | <b>1.72</b> | 0.020  | 0.103 | 0.849             | 1.02        |
| Community                                     | 0.235  | 0.262 | 0.372             | 1.26        | 0.073   | 0.266 | 0.785             | 1.08        | 0.011  | 0.242 | 0.963             | 1.01        | 0.170  | 0.274 | 0.537             | 1.18        | 0.122  | 0.142 | 0.390             | 1.13        |
| Dialysis patients                             | 0.132  | 0.224 | 0.557             | 1.14        | -0.088  | 0.239 | 0.714             | 0.92        | 0.774  | 0.257 | <b>0.003</b>      | <b>2.17</b> | 0.150  | 0.307 | 0.627             | 1.16        | 0.099  | 0.175 | 0.571             | 1.10        |
| Renal transplant recipients                   | 0.752  | 0.275 | <b>0.007</b>      | <b>2.12</b> | 0.751   | 0.289 | <b>0.010</b>      | <b>2.12</b> | 0.541  | 0.300 | 0.073             | 1.72        | 0.076  | 0.428 | 0.859             | 1.08        | 0.699  | 0.222 | <b>0.002</b>      | <b>2.01</b> |
| Infectious diseases                           | 0.301  | 0.266 | 0.259             | 1.35        | 0.934   | 0.278 | <b>0.001</b>      | <b>2.54</b> | 0.895  | 0.261 | <b>0.001</b>      | <b>2.45</b> | 0.814  | 0.302 | <b>0.008</b>      | <b>2.26</b> | 0.618  | 0.166 | <b>&lt;0.001</b>  | <b>1.86</b> |
| <b>Publication year</b>                       |        |       |                   |             |         |       |                   |             |        |       |                   |             |        |       |                   |             |        |       |                   |             |
| <2000 (ref)                                   | —      | —     | —                 | 1.00        | —       | —     | —                 | 1.00        | —      | —     | —                 | 1.00        | —      | —     | —                 | 1.00        | —      | —     | —                 | 1.00        |
| 2000 to <2005                                 | 0.562  | 0.290 | 0.055             | 1.75        | 0.453   | 0.305 | 0.139             | 1.57        | -0.180 | 0.33  | 0.582             | 0.84        | -0.357 | 0.385 | 0.355             | 0.70        | 0.328  | 0.213 | 0.126             | 1.39        |
| 2005 to <2010                                 | 0.352  | 0.295 | 0.234             | 1.42        | 0.568   | 0.309 | 0.069             | 1.76        | -0.327 | 0.330 | 0.323             | 0.72        | -0.630 | 0.389 | 0.108             | 0.53        | 0.238  | 0.216 | 0.272             | 1.27        |
| ≥2010                                         | 0.453  | 0.296 | 0.128             | 1.57        | 0.687   | 0.311 | <b>0.029</b>      | <b>1.99</b> | 0.015  | 0.332 | 0.965             | 1.01        | -0.227 | 0.392 | 0.563             | 0.80        | 0.398  | 0.217 | 0.069             | 1.49        |
| <b>Gender – male†</b>                         | 0.518  | 0.290 | 0.076             | 1.68        | 0.519   | 0.297 | 0.083             | 1.68        | 0.092  | 0.289 | 0.751             | 1.10        | 0.549  | 0.352 | 0.121             | 1.73        | 0.340  | 0.186 | 0.069             | 1.41        |
| <b>Age at assessment (yrs.)</b>               | -0.026 | 0.007 | <b>0.001</b>      | <b>0.97</b> | -0.0003 | 0.008 | 0.967             | 1.00        | -0.012 | 0.007 | 0.103             | 0.99        | -0.019 | 0.010 | <b>0.050</b>      | <b>0.98</b> | -0.017 | 0.005 | <b>0.001</b>      | <b>0.98</b> |
| <b>Estimated Age at infection (yrs.)</b>      | 0.023  | 0.008 | <b>0.005</b>      | <b>1.02</b> | 0.029   | 0.008 | <b>&lt;0.001</b>  | <b>1.03</b> | 0.035  | 0.008 | <b>&lt;0.001</b>  | <b>1.04</b> | 0.027  | 0.010 | <b>0.009</b>      | <b>1.03</b> | 0.026  | 0.005 | <b>&lt;0.001</b>  | <b>1.03</b> |
| <b>Estimated Duration of infection (yrs.)</b> | -0.065 | 0.007 | <b>&lt;0.0001</b> | <b>0.94</b> | -0.036  | 0.009 | <b>&lt;0.0001</b> | <b>0.96</b> | -0.059 | 0.008 | <b>&lt;0.0001</b> | <b>0.94</b> | -0.058 | 0.010 | <b>&lt;0.0001</b> | <b>0.94</b> | -0.052 | 0.004 | <b>&lt;0.0001</b> | <b>0.95</b> |
| <b>Injecting drug use†</b>                    | 0.022  | 0.204 | 0.913             | 1.02        | -0.092  | 0.207 | 0.657             | 0.91        | -0.180 | 0.199 | 0.369             | 0.84        | 0.500  | 0.236 | <b>0.036</b>      | <b>1.65</b> | -0.003 | 0.128 | 0.979             | 1.00        |
| <b>Blood transfusion†</b>                     | 0.417  | 0.273 | 0.129             | 1.52        | 0.284   | 0.279 | 0.311             | 1.33        | 0.551  | 0.263 | <b>0.038</b>      | 1.73        | 0.188  | 0.321 | 0.559             | 1.21        | 0.362  | 0.169 | <b>0.034</b>      | <b>1.44</b> |
| <b>Elevated ALT†</b>                          | 0.852  | 0.272 | <b>0.002</b>      | <b>2.34</b> | 0.074   | 0.297 | 0.805             | 1.08        | -0.058 | 0.305 | 0.851             | 0.94        | 0.332  | 0.369 | 0.370             | 1.39        | 0.476  | 0.199 | <b>0.018</b>      | <b>1.61</b> |
| <b>Excess alcohol use†</b>                    | -0.644 | 0.267 | <b>0.017</b>      | <b>0.53</b> | 0.432   | 0.273 | 0.117             | 1.54        | -0.035 | 0.261 | 0.893             | 0.97        | 0.275  | 0.305 | 0.368             | 1.32        | -0.066 | 0.165 | 0.687             | 0.94        |
| <b>HIV positive†</b>                          | -0.192 | 0.809 | 0.813             | 0.83        | 0.116   | 0.815 | 0.888             | 1.12        | -0.365 | 0.770 | 0.636             | 0.69        | 1.052  | 0.909 | 0.249             | 2.86        | -0.069 | 0.486 | 0.888             | 0.93        |
| <b>Genotype-1†</b>                            | -0.080 | 0.214 | 0.708             | 0.92        | -0.358  | 0.215 | 0.099             | 0.70        | -0.626 | 0.199 | <b>0.002</b>      | <b>0.53</b> | -0.935 | 0.236 | <b>&lt;0.001</b>  | <b>0.39</b> | -0.317 | 0.129 | <b>0.015</b>      | <b>0.73</b> |
| <b>Genotype-3†</b>                            | 0.378  | 0.300 | 0.210             | 1.46        | 0.259   | 0.307 | 0.401             | 1.29        | 0.376  | 0.290 | 0.198             | 1.46        | 0.962  | 0.337 | <b>0.005</b>      | <b>2.62</b> | 0.367  | 0.184 | <b>0.048</b>      | <b>1.44</b> |
| <b>White†</b>                                 | 0.019  | 0.197 | 0.925             | 1.02        | 0.0004  | 0.201 | 0.998             | 1.00        | -0.188 | 0.192 | 0.330             | 0.83        | 0.147  | 0.230 | 0.523             | 1.16        | -0.013 | 0.124 | 0.918             | 0.99        |
| <b>Black†</b>                                 | -0.440 | 0.308 | 0.155             | 0.64        | -0.166  | 0.316 | 0.601             | 0.85        | -0.485 | 0.298 | 0.105             | 0.62        | -0.759 | 0.357 | <b>0.035</b>      | <b>0.47</b> | -0.374 | 0.189 | <b>0.050</b>      | <b>0.69</b> |
| <b>Asiant†</b>                                | -0.569 | 0.409 | 0.166             | 0.57        | -0.196  | 0.421 | 0.643             | 0.82        | -0.375 | 0.404 | 0.355             | 0.69        | 0.067  | 0.464 | 0.885             | 1.07        | -0.321 | 0.254 | 0.209             | 0.73        |

Supplementary Table 8. Linear mixed model-maximum likelihood method. \*Natural Log-transformed progression rates. Missing were imputed using mean values. †Proportion. Values in bold indicate statistical significance. Abbreviations: scFPR: stage-constant annual fibrosis progression rate (assuming constant progression over F0 to F4); β: coefficient; SE: standard error; HCV: hepatitis C virus; HIV: human immunodeficiency virus; RNA: ribonucleic acid; CHC: chronic hepatitis

## Supplementary Materials

## Database search strategy and search strings

## 1. MEDLINE

**Databases searched:** Ovid MEDLINE: Epub Ahead of Print, In-Process & Other Non-Indexed Citations, Ovid MEDLINE® Daily and Ovid MEDLINE® 1946-Present

**Search date:** Jan 02, 2018

**Limits:** 2007 -Current

**Filters:** BMJ Clinical Evidence - MEDLINE cohort and case-control filter [undated] [Ovid] from website <http://www.york.ac.uk/inst/crd/intertasc/observational.htm>

## Search Strategy:

| #  | Searches                                                                                                                            |
|----|-------------------------------------------------------------------------------------------------------------------------------------|
| 1  | exp cohort studies/                                                                                                                 |
| 2  | cohort\$.tw.                                                                                                                        |
| 3  | controlled clinical trial.pt.                                                                                                       |
| 4  | epidemiologic methods/                                                                                                              |
| 5  | limit 4 to yr=1966-1989                                                                                                             |
| 6  | exp case-control studies/                                                                                                           |
| 7  | (case\$ and control\$).tw.                                                                                                          |
| 8  | or/1-3,5-7                                                                                                                          |
| 9  | exp hepatitis C/                                                                                                                    |
| 10 | Hepacivirus/                                                                                                                        |
| 11 | ((("parenterally transmitted " or parenterally-transmitted) adj3 ("non a non b hepatitis" or "hepatitis viral non-a non-b")).ti,ab. |
| 12 | ("hepatitis c" adj2 chronic).ti,ab.                                                                                                 |
| 13 | ((("hepatitis C" or "hepatitis c" or "hepatitis c-like" or "hepatitis c like") adj3 virus\$).ti,ab.                                 |
| 14 | (virus\$ or hepacivirus\$ or HCV or "hepatitis c" or "pt-nanbh").ti,ab.                                                             |
| 15 | or/9-14                                                                                                                             |
| 16 | exp disease progression/                                                                                                            |
| 17 | ((progression? or exacerbation) adj2 disease).ti,ab.                                                                                |
| 18 | fibrosis/                                                                                                                           |
| 19 | Liver Cirrhosis/                                                                                                                    |
| 20 | (fibros\$ or cirrhosis).ti,ab.                                                                                                      |
| 21 | ((fibros\$ or cirrhosis) adj2 (liver or hepatic)).ti,ab.                                                                            |
| 22 | or/16-21                                                                                                                            |
| 23 | Prognosis/                                                                                                                          |
| 24 | prognos\$.ti,ab.                                                                                                                    |
| 25 | disease-free survival/                                                                                                              |
| 26 | (survival? adj3 ("disease-free" or "disease freeor progression-free" or "progression free" or "event-free" or "event free")).ti,ab. |
| 27 | medical futility/                                                                                                                   |
| 28 | (futil\$ adj2 (treatment? or medical)).ti,ab.                                                                                       |
| 29 | treatment outcome/                                                                                                                  |
| 30 | (treatment adj2 (efficacy or effectiveness or outcome)).ti,ab.                                                                      |
| 31 | (outcome adj2 rehabilitation).ti,ab.                                                                                                |
| 32 | treatment failure/                                                                                                                  |
| 33 | (treatment adj2 failure?).ti,ab.                                                                                                    |
| 34 | morbidity/                                                                                                                          |
| 35 | morbidity\$.ti,ab.                                                                                                                  |
| 36 | mortality/                                                                                                                          |
| 37 | (mortality\$ or death rate?).ti,ab.                                                                                                 |
| 38 | (mortality\$ adj3 (decline? or determinant? or differential or excess)).ti,ab.                                                      |
| 39 | ("death rate?" adj3 ("age-specific" or "age specific")).ti,ab.                                                                      |
| 40 | ((death or "case fatality") adj2 rate?).ti,ab.                                                                                      |
| 41 | fatal outcome/                                                                                                                      |
| 42 | (outcome? adj2 fatal).ti,ab.                                                                                                        |

## Supplementary Materials

|    |                                                                                                                 |
|----|-----------------------------------------------------------------------------------------------------------------|
| 43 | hospital mortality/                                                                                             |
| 44 | (mortalit\$ adj3 (hospital or "in-hospital" or inhospital or "in hospital" or "in-house" or "in house")).ti,ab. |
| 45 | survival rate/                                                                                                  |
| 46 | (rate adj3 survival adj3 (mean or rate or cumulative)).ti,ab.                                                   |
| 47 | (survivorship or (survival adj2 (rates or "times mean"))).ti,ab.                                                |
| 48 | or/23-47                                                                                                        |
| 49 | 8 and 15 and 22 and 48                                                                                          |

### 2. EMBASE

**Databases searched:** Embase Classic+Embase 1947 to 2017 December 29

**Search date:** January 02, 2018

**Limits:** 2007-Current

**Filters:** BMJ Clinical Evidence - EMBASE cohort and case-control filter [undated] [Ovid] from website <http://www.york.ac.uk/inst/crd/intertasc/observational.htm>

#### Search Strategy:

| #  | Searches                                                                                                                            |
|----|-------------------------------------------------------------------------------------------------------------------------------------|
| 1  | exp hepatitis C/                                                                                                                    |
| 2  | exp hepatitis C virus/                                                                                                              |
| 3  | ((("parenterally transmitted " or parenterally-transmitted) adj3 ("non a non b hepatitis" or "hepatitis viral non-a non-b")).ti,ab. |
| 4  | ("hepatitis c" adj2 chronic).ti,ab.                                                                                                 |
| 5  | ((("hepatitis C" or "hepatitis c" or "hepatitis c-like" or "hepatitis c like") adj3 virus\$).ti,ab.                                 |
| 6  | (hepacivirus\$ or HCV or "hepatitis c" or "pt-nanbh").ti,ab.                                                                        |
| 7  | or/1-6                                                                                                                              |
| 8  | exp disease course/                                                                                                                 |
| 9  | ((progression? or exacerbation) adj2 disease).ti,ab.                                                                                |
| 10 | liver fibrosis/                                                                                                                     |
| 11 | fibrosis.ti,ab.                                                                                                                     |
| 12 | liver cirrhosis/                                                                                                                    |
| 13 | (fibros\$ or cirrhosis).ti,ab.                                                                                                      |
| 14 | ((fibros\$ or cirrhosis) adj2 (liver or hepatic)).ti,ab.                                                                            |
| 15 | or/8-14                                                                                                                             |
| 16 | prognosis/                                                                                                                          |
| 17 | prognos\$.mp.                                                                                                                       |
| 18 | disease-free survival/                                                                                                              |
| 19 | (survival? adj3 ("disease-free" or "disease freeor progression-free" or "progression free" or "event-free" or "event free")).ti,ab. |
| 20 | (futil\$ adj2 (treatment? or medical)).ti,ab.                                                                                       |
| 21 | treatment outcome/                                                                                                                  |
| 22 | (treatment adj2 (efficacy or effectiveness or outcome)).ti,ab.                                                                      |
| 23 | (outcome adj2 rehabilitation).ti,ab.                                                                                                |
| 24 | treatment failure/                                                                                                                  |
| 25 | (treatment adj2 failure?).ti,ab.                                                                                                    |
| 26 | morbidity/                                                                                                                          |
| 27 | morbidity\$.ti,ab.                                                                                                                  |
| 28 | mortality/                                                                                                                          |
| 29 | (mortalit\$ or death rate?).ti,ab.                                                                                                  |
| 30 | (mortalit\$ adj3 (decline? or determinant? or differential or excess)).ti,ab.                                                       |
| 31 | (death rate? adj3 ("age-specific" or "age specific")).ti,ab.                                                                        |
| 32 | fatality/                                                                                                                           |
| 33 | (outcome? adj2 fatal).ti,ab.                                                                                                        |
| 34 | (mortalit\$ adj3 (hospital or "in-hospital" or inhospital or "in hospital" or "in-house" or "in house")).ti,ab.                     |
| 35 | survival rate/                                                                                                                      |
| 36 | (rate adj3 survival adj3 (mean or rate or cumulative)).ti,ab.                                                                       |
| 37 | (survivorship or (survival adj2 (rates or "times mean"))).ti,ab.                                                                    |

## Supplementary Materials

|    |                            |
|----|----------------------------|
| 38 | or/16-37                   |
| 39 | exp cohort analysis/       |
| 40 | exp longitudinal study/    |
| 41 | exp prospective study/     |
| 42 | exp follow up/             |
| 43 | cohort\$.tw.               |
| 44 | exp case control study/    |
| 45 | (case\$ and control\$).tw. |
| 46 | or/39-45                   |
| 47 | 7 and 15 and 38 and 46     |

## PUBMED

**Databases searched: PubMed****Limits:** Publication date from 2007/01/01 to 2018/01/02**Filters:** BMJ Clinical Evidence - EMBASE cohort and case-control filter [undated] [Ovid translated into PubMed] from website <http://www.york.ac.uk/inst/crd/intertasc/observational.htm>**Search Strategy:**

((cohort studies[mesh]) OR (cohort\$[Title]) OR (epidemiologic methods[mesh:noexp]) OR (case-control studies[mesh]) OR ((case\$ AND control\$) AND Title) OR (limit AND (epidemiologic methods[mesh:noexp]) AND to yr=1966-1989)) **AND** ((hepatitis C[mesh]) OR (Hepacivirus[mesh:noexp]) OR (((parenterally transmitted[tiab] OR parenterally-transmitted[tiab]) AND ("non a non b hepatitis"[tiab] OR "hepatitis viral non-a non-b"[tiab]))) OR (("hepatitis c"[tiab] AND chronic[tiab])) OR (((hepatitis C"[tiab] OR "hepatitis c"[tiab] OR "hepatitis c-like"[tiab] OR "hepatitis c like"[tiab]) AND virus\$[tiab])) OR ((virus\$[tiab] OR hepacivirus\$[tiab] OR HCV[tiab] OR "hepatitis c"[tiab] OR "pt-nanbh"[tiab]))) **AND** ((disease progression[mesh]) OR (((progression\*[tiab] OR exacerbation[tiab]) AND disease[tiab])) OR (fibrosis[mesh:noexp]) OR (Liver Cirrhosis[mesh:noexp]) OR ((fibros\$[tiab] OR cirrhosis[tiab])) OR (((fibros\$[tiab] OR cirrhosis[tiab]) AND (liver[tiab] OR hepatic[tiab]))) **AND** ((Prognosis[mesh:noexp]) OR (prognos\$[tiab]) OR (disease-free survival[mesh:noexp]) OR ((survival\*[tiab] AND ("disease-free"[tiab] OR "disease free"[tiab] OR "progression-free"[tiab] OR "progression free"[tiab] OR "event-free"[tiab] OR "event free"[tiab]))) OR (medical futility[mesh:noexp]) OR ((futil\$[tiab] AND (treatment\*[tiab] OR medical[tiab]))) OR (treatment outcome[mesh:noexp]) OR ((treatment[tiab] AND (efficacy[tiab] OR effectiveness[tiab] OR outcome[tiab]))) OR ((outcome[tiab] AND rehabilitation[tiab])) OR (treatment failure[mesh:noexp]) OR ((treatment[tiab] AND failure\*[tiab])) OR (morbidity[mesh:noexp]) OR (morbidity[tiab]) OR (mortality[mesh:noexp]) OR ((mortality[tiab] OR death rate\*[tiab])) OR ((mortality[tiab] AND (decline\*[tiab] OR determinant\*[tiab] OR differential[tiab] OR excess[tiab]))) OR ((death rate\*[tiab] AND ("age-specific"[tiab] OR "age specific"[tiab]))) OR (((death[tiab] OR "case fatality"[tiab]) AND rate\*[tiab])) OR (fatal outcome[mesh:noexp]) OR ((outcome\*[tiab] AND fatal[tiab])) OR (hospital mortality[mesh:noexp]) OR ((mortality[tiab] AND (hospital[tiab] OR "in-hospital"[tiab] OR inhospital[tiab] OR "in hospital"[tiab] OR "in-house"[tiab] OR "in house"[tiab]))) OR (survival rate[mesh:noexp]) OR ((rate[tiab] AND survival[tiab] AND (mean[tiab] OR rate[tiab] OR cumulative[tiab]))) OR ((survivorship[tiab] OR survival[tiab] AND (rates[tiab] OR "times mean"[tiab])))



## Supplementary Materials

### List of extracted data items

Previously identified data items were abstracted in duplicate by two independent reviewers using piloted abstraction sheets in excel. Study authors were not contacted to obtain missing data. For non-English studies, native speakers were contacted for help with full-text review and data extraction process. Abstract were not included in the current analysis as these records do not report information necessary for estimating prognosis (i.e. duration of infection).

#### 1. Study related factors:

- Study design (i.e. cross-sectional/retrospective, retrospective-prospective, prospective)
- Study setting (i.e. clinical, non-clinical)
- Study population (i.e. blood donor, female cohort, dialysis patient, IDUs, community, pediatric, post-transfusion, renal transplant recipients)
- Sample size
- Country

#### 2. Host-related factors:

- Gender (n, % male)
- Mean age at assessment of liver disease (years)
- Mean age at HCV acquisition [where unavailable, data were calculated by taking the difference between mean age at assessment of liver disease and the mean duration of HCV infection] (years)
- Mean estimated duration of HCV infection (years)
- Mode of HCV acquisition (n, %: IDU, blood transfusion, sporadic)
- Excess alcohol consumption [as defined in study] (n, %)
- Mean body mass index (BMI) (kg/m<sup>2</sup>)
- History of diabetes mellitus (n, %)
- Coinfection with HBV (n, % HBsAg positive)
- Coinfection with HIV (n, %)

#### 3. Virus related factors:

- HCV genotype (n, %: G1, G2, G3, G4, other)
- HCV RNA positivity (n, %)
- HCV RNA viral load (IU/ml)

#### 4. Liver-related factors

- Elevated ALT levels (n, %)
- Mean ALT (IU/L)
- Presence of hepatic steatosis (n, %)
- Method of fibrosis assessment (e.g. LB, TE, combination LB and non-invasive)
- Method of fibrosis scoring (e.g. METAIR, Ishak, or cutoffs for non-invasive tests)
- Fibrosis stage distributions at latest available follow-up point (n, %: F0 to F4) [where data were reported as composite (i.e., F0/F1) a 50:50 distributions was applied to the 2 stages. Stage distribution was not performed if more than two stages were reported in composite]
- Liver biopsy length (mm)
- Clinical or histological diagnosis of cirrhosis (n, %)
- Mean histological activity index (HAI) Inflammatory score

**Note on missing data:** Age at infection, for studies that did not report this, was imputed by taking the difference between age at assessment and the duration of infection. For studies that report composite fibrosis stages (e.g., F0/F1), data were distributed 50:50 across F0 and F1. Stage distribution was not performed when more than two stages were reported collectively (e.g., F0/F1/F2).



## Supplementary Materials

## Supplemental References

- 1 Boonwaat L, Haber PS, Levy MH, *et al.* Establishment of a successful assessment and treatment service for Australian prison inmates with chronic hepatitis C. *Med J Aust* 2010;**192**:496–500.
- 2 Contreras AM, Ruiz I, Polanco-Cruz G, *et al.* End-stage renal disease and hepatitis C infection: comparison of alanine aminotransferase levels and liver histology in patients with and without renal damage. *Ann. Hepatol.* 2007;**6**:48–54.
- 3 Brescini L, Orsetti E, Gesuita R, *et al.* Evaluating Liver Fibrosis by Transient Elastometry in Patients With HIV-HCV Coinfection and Mono-infection. *Hepat Mon* 2014;**14**:e15426. doi:<http://dx.doi.org/10.5812/hepatmon.15426>
- 4 de Lédighen V, Barreiro P, Foucher J, *et al.* Liver fibrosis on account of chronic hepatitis C is more severe in HIV-positive than HIV-negative patients despite antiretroviral therapy. *J Viral Hepat* 2008;**15**:427–33. doi:10.1111/j.1365-2893.2007.00962.x
- 5 Nunnari G. Circulating fibrocytes as a marker of liver fibrosis in chronic hepatitis C. *Front Biosci* 2010;**E2**:1241. doi:10.2741/E184
- 6 Mazzocato S, Orsetti E, Gesuita R, *et al.* Comparison of liver fibrosis progression in HIV / HCV co-infected and HCV mono-infected patients by transient elastometry. 2014;**39**:797–802. doi:10.3109/00365548.2014.952245
- 7 Suárez-Zarracina T, Valle-Garay E, Collazos J, *et al.* Didanosine (ddl) associates with increased liver fibrosis in adult HIV-HCV coinfecting patients. *J Viral Hepat* 2012;**19**:685–93. doi:10.1111/j.1365-2893.2012.01596.x
- 8 Liu S, Cheng M, Mu M, *et al.* [Natural clearance of hepatitis C virus in 96 patients with infection acquired by blood transfusion from a single donor in Guizhou]. *Zhonghua Gan Zang Bing Za Zhi* 2014;**22**:251–4. doi:10.3760/cma.j.issn.1007-3418.2014.04.003
- 9 Valva P, Gismondi MI, Casciato PC, *et al.* Distinctive intrahepatic characteristics of paediatric and adult pathogenesis of chronic hepatitis C infection. *Clin Microbiol Infect* 2014;**20**:O998–1009. doi:10.1111/1469-0691.12728
- 10 Delgado-Borrego A, Healey D, Negre B, *et al.* Influence of body mass index on outcome of pediatric chronic hepatitis C virus infection. *J Pediatr Gastroenterol Nutr* 2010;**51**:191–7. doi:10.1097/MPG.0b013e3181d32756 10.1097/MPG.0b013e3181d32756.
- 11 Hui C-K, Zhang H-Y, Shek T, *et al.* Disease progression in Chinese chronic hepatitis C patients with persistently normal alanine aminotransferase levels. *Aliment. Pharmacol. Ther.* 2007;**25**:1283–92.
- 12 Liu T, Howell GT, Turner L, *et al.* Marijuana use in hepatitis C infection does not affect liver biopsy histology or treatment outcomes. *Can J Gastroenterol Hepatol* 2014;**28**:381–4.
- 13 Nanda KS, Brady JJ, Murray BF, *et al.* Elevated circulating osteoprotegerin and reduced matrix-metalloproteinase-9 in post-menopausal women with chronic Hepatitis C virus infection. *Cytokine.* 2012;**60**:328–33.
- 14 Siddiqui FA, Ehrinpreis MN, Janisse J, *et al.* Demographics of a large cohort of urban chronic hepatitis C patients. *Hepatol. Int.* 2008;**2**:376–81.
- 15 Hissar SS, Kumar M, Tyagi P, *et al.* Natural history of hepatic fibrosis progression in chronic hepatitis C virus infection in India. *J Gastroenterol Hepatol* 2009;**24**:581–7. doi:10.1111/j.1440-1746.2008.05649.x
- 16 Kallwitz ER, Layden-Almer J, Dhamija M, *et al.* Ethnicity and body mass index are associated with hepatitis C presentation and progression. *Clin Gastroenterol Hepatol* 2010;**8**:72–8. doi:10.1016/j.cgh.2009.08.009

## Supplementary Materials

- 1  
2  
3 17 Larsen C, Bousquet V, Delarocque-Astagneau E, *et al.* Hepatitis C virus genotype 3 and the risk of  
4 severe liver disease in a large population of drug users in France. *J Med Virol* 2010;**82**:1647–54.  
5 doi:10.1002/jmv.21850
- 6 18 Agostini H, Castera L, Melin P, *et al.* HEPACOM: multicenter, observational prospective study of outcome  
7 and monitoring of HCV positive antiviral-naive patients managed in the French health care system.  
8 *Gastroenterol. Clin. Biol.* 2007;**31**:1074–80.
- 9 19 Allison RD, Conry-Cantilena C, Koziol D, *et al.* A 25-year study of the clinical and histologic outcomes of  
10 hepatitis C virus infection and its modes of transmission in a cohort of initially asymptomatic blood  
11 donors. *J. Infect. Dis.* 2012;**206**:654–61.
- 12 20 Marabita F, Aghemo A, De Nicola S, *et al.* Genetic variation in the interleukin-28B gene is not associated  
13 with fibrosis progression in patients with chronic hepatitis C and known date of infection. *Hepatology*  
14 2011;**54**:1127–34. doi:10.1002/hep.24503
- 15 21 White DL, Tavakoli-Tabasi S, Kuzniarek J, *et al.* Higher serum testosterone is associated with increased  
16 risk of advanced hepatitis C-related liver disease in males. *Hepatology* 2012;**55**:759–68.  
17 doi:10.1002/hep.24618
- 18 22 Reggiardo MV, Fay F, Tanno M, *et al.* Natural history of hepatitis C virus infection in a cohort of  
19 asymptomatic post-transfused subjects. *Ann Hepatol*;11:658–66.
- 20 23 Terrault NA, Im K, Boylan R, *et al.* Fibrosis progression in African Americans and Caucasian Americans  
21 with chronic hepatitis C. *Clin Gastroenterol Hepatol* 2008;**6**:1403–11. doi:10.1016/j.cgh.2008.08.006
- 22 24 Guyader D, Thirouard A-S, Erdtmann L, *et al.* Liver iron is a surrogate marker of severe fibrosis in chronic  
23 hepatitis C. *J Hepatol* 2007;**46**:587–95. doi:10.1016/j.jhep.2006.09.021
- 24 25 Pradat P, Voirin N, Tillmann HL, *et al.* Progression to cirrhosis in hepatitis C patients: An age-dependent  
25 process. *Liver Int* 2007;**27**:335–9. doi:10.1111/j.1478-3231.2006.01430.x
- 26 26 Castéra L, Hézode C, Roudot-Thoraval F, *et al.* Effect of antiviral treatment on evolution of liver steatosis  
27 in patients with chronic hepatitis C: indirect evidence of a role of hepatitis C virus genotype 3 in steatosis.  
28 *Gut* 2004;**53**:420–4.
- 29 27 Mathurin P. Slow progression rate of fibrosis in hepatitis C virus patients with persistently normal alanine  
30 transaminase activity. *Hepatology* 1998;**27**:868–72. doi:10.1002/hep.510270333
- 31 28 Cepeda JA, Thomas DL, Astemborski J, *et al.* Liver disease progression in a community-based sample of  
32 HCV-infected PWID. *Top Antivir Med* 2016;**24 (E-1)**:218.
- 33 29 Cepeda JA, Thomas DL, Astemborski J, *et al.* Increased mortality among persons with chronic hepatitis  
34 C with moderate or severe liver disease: a cohort study. *Clin Infect Dis* 2017;**10**:10.  
35 doi:https://dx.doi.org/10.1093/cid/cix207
- 36 30 Bourliere M, Ouzan D, Rosenheim M, *et al.* Pegylated interferon-alpha2a plus ribavirin for chronic  
37 hepatitis C in a real-life setting: the Hepatys French cohort (2003-2007). *Antivir Ther* 2012;**17**:101–10.  
38 doi:http://dx.doi.org/10.3851/IMP1935
- 39 31 Lemos LB, Perez RM, Lemos MM, *et al.* Hepatitis C in chronic kidney disease: predialysis patients  
40 present more severe histological liver injury than hemodialysis patients? *Am J Nephrol* 2007;**27**:191–6.  
41 doi:10.1159/000100892
- 42 32 Delladetsima I, Psychogiou M, Sypsa V, *et al.* Time of acquisition of HCV infection in renal transplant  
43 recipients: a major prognostic factor for disease progression. *Clin Transpl* 2013;**27**:72–9.  
44 doi:10.1111/ctr.12012
- 45 33 Besheer T, El-Bendary M, Elalfy H, *et al.* Prediction of Fibrosis Progression Rate in Patients with Chronic  
46 Hepatitis C Genotype 4: Role of Cirrhosis Risk Score and Host Factors. *J Interf Cytokine Res*

## Supplementary Materials

- 2017;**37**:97–102. doi:10.1089/jir.2016.0111
- 34 Sakellariou S, Boletis JN, Sypsa V, *et al.* Histological features of chronic hepatitis C in haemodialysis patients. *Liver Int* 2014;**34**:e56-61. doi:https://dx.doi.org/10.1111/liv.12413
- 35 Forestier N, Gaus A, Herrmann E, *et al.* Acoustic radiation force impulse imaging for evaluation of antiviral treatment response in chronic hepatitis C. *J Gastrointest Liver Dis* 2012;**21**:367–73.
- 36 Goodman ZD, Makhlof HR, Liu L, *et al.* Pathology of chronic hepatitis C in children: liver biopsy findings in the Peds-C Trial. *Hepatology* 2008;**47**:836–43. doi:10.1002/hep.22094
- 37 Rao H-Y, Sun D-G, Yang R-F, *et al.* Outcome of hepatitis C virus infection in Chinese paid plasma donors: a 12-19-year cohort study. *J Gastroenterol Hepatol.* 2012;**27**:526–32.
- 38 Werner T, Aqel B, Balan V, *et al.* Treatment of hepatitis C in renal transplantation candidates: a single-center experience. *Transplantation.* 2010;**90**:407–11.
- 39 Bochud P-Y, Cai T, Overbeck K, *et al.* Genotype 3 is associated with accelerated fibrosis progression in chronic hepatitis C. *J Hepatol* 2009;**51**:655–66. doi:10.1016/j.jhep.2009.05.016
- 40 Kielland KB, Delaveris GJ, Rogde S, *et al.* Liver fibrosis progression at autopsy in injecting drug users infected by hepatitis C: a longitudinal long-term cohort study. *J Hepatol* 2014;**60**:260–6. doi:10.1016/j.jhep.2013.09.022
- 41 Lawson A, Trent Hepatitis CSG. Hepatitis C virus-infected patients with a persistently normal alanine aminotransferase: do they exist and is this really a group with mild disease? *J Viral Hepat* 2010;**17**:51–8. doi:10.1111/j.1365-2893.2009.01148.x
- 42 Patin E, Kutalik Z, Guergnon J, *et al.* Genome-wide association study identifies variants associated with progression of liver fibrosis from HCV infection. *Gastroenterology* 2012;**143**:1212–44. doi:10.1053/j.gastro.2012.07.097
- 43 Midgard H, Hajarizadeh B, Cunningham EB, *et al.* Changes in risk behaviours during and following treatment for hepatitis C virus infection among people who inject drugs: The ACTIVATE study. *Int J Drug Policy* 2017;**47**:230–8. doi:10.1016/j.drugpo.2017.05.040
- 44 Chen Yi Mei SLG, Thompson AJ, Christensen B, *et al.* Sustained virological response halts fibrosis progression : A long-term follow-up study of people with chronic hepatitis C infection. *PLoS ONE* 2017;**12**:1–12.
- 45 Bruden DJ, McMahon BJ, Townshend-Bulson L, *et al.* Risk of End Stage Liver Disease, Hepatocellular Carcinoma and Liver-Related Death By Fibrosis Stage in the Hepatitis C Alaska Cohort. *Hepatology* Published Online First: 2017. doi:10.1002/hep.29115
- 46 Castéra L, Vergniol J, Foucher J, *et al.* Prospective comparison of transient elastography, Fibrotest, APRI, and liver biopsy for the assessment of fibrosis in chronic hepatitis C. *Gastroenterology* 2005;**128**:343–50. doi:10.1053/j.gastro.2004.11.018
- 47 Delgado-Borrego A, Jordan SH, Negre B, *et al.* Reduction of Insulin Resistance With Effective Clearance of Hepatitis C Infection: Results From the HALT-C Trial. *Clin Gastroenterol Hepatol* 2010;**8**:458–62.

## MOOSE Checklist for Meta-analyses of Observational Studies

| Item No                                     | Recommendation                                                                                                                             | Reported on Page No                  |
|---------------------------------------------|--------------------------------------------------------------------------------------------------------------------------------------------|--------------------------------------|
| Reporting of background should include      |                                                                                                                                            |                                      |
| 1                                           | Problem definition                                                                                                                         | 5-6                                  |
| 2                                           | Hypothesis statement                                                                                                                       | [Descriptive]                        |
| 3                                           | Description of study outcome(s)                                                                                                            | 6                                    |
| 4                                           | Type of exposure or intervention used                                                                                                      | 6<br>[Natural history of CHC]        |
| 5                                           | Type of study designs used                                                                                                                 | 6                                    |
| 6                                           | Study population                                                                                                                           | 6                                    |
| Reporting of search strategy should include |                                                                                                                                            |                                      |
| 7                                           | Qualifications of searchers (eg, librarians and investigators)                                                                             | 6-7                                  |
| 8                                           | Search strategy, including time period included in the synthesis and key words                                                             | 6-7, 51-53<br>[Supplemental methods] |
| 9                                           | Effort to include all available studies, including contact with authors                                                                    | 6-7, 51-53<br>[Supplemental methods] |
| 10                                          | Databases and registries searched                                                                                                          | 6-7, 51-53<br>[Supplemental methods] |
| 11                                          | Search software used, name and version, including special features used (eg, explosion)                                                    | 6-7, 51-53<br>[Supplemental methods] |
| 12                                          | Use of hand searching (eg, reference lists of obtained articles)                                                                           | 6-7                                  |
| 13                                          | List of citations located and those excluded, including justification                                                                      | 44-46<br>[Supplemental methods]      |
| 14                                          | Method of addressing articles published in languages other than English                                                                    | 7,54<br>[Supplemental methods]       |
| 15                                          | Method of handling abstracts and unpublished studies                                                                                       | 7,54<br>[Supplemental methods]       |
| 16                                          | Description of any contact with authors                                                                                                    | 7,54<br>[Supplemental methods]       |
| Reporting of methods should include         |                                                                                                                                            |                                      |
| 17                                          | Description of relevance or appropriateness of studies assembled for assessing the hypothesis to be tested                                 | 7-8, 25<br>[Table1]                  |
| 18                                          | Rationale for the selection and coding of data (eg, sound clinical principles or convenience)                                              | 7,27,54<br>[TableS1]                 |
| 19                                          | Documentation of how data were classified and coded (eg, multiple raters, blinding and interrater reliability)                             | 7,27,54<br>[TableS1]                 |
| 20                                          | Assessment of confounding (eg, comparability of cases and controls in studies where appropriate)                                           | 8                                    |
| 21                                          | Assessment of study quality, including blinding of quality assessors, stratification or regression on possible predictors of study results | 8-9                                  |

|                                     |                                                                                                                                                                                                                                                                              |                                           |
|-------------------------------------|------------------------------------------------------------------------------------------------------------------------------------------------------------------------------------------------------------------------------------------------------------------------------|-------------------------------------------|
| 22                                  | Assessment of heterogeneity                                                                                                                                                                                                                                                  | 8-9                                       |
| 23                                  | Description of statistical methods (eg, complete description of fixed or random effects models, justification of whether the chosen models account for predictors of study results, dose-response models, or cumulative meta-analysis) in sufficient detail to be replicated | 8-9                                       |
| 24                                  | Provision of appropriate tables and graphics                                                                                                                                                                                                                                 | 23<br>[Fig1]                              |
| Reporting of results should include |                                                                                                                                                                                                                                                                              |                                           |
| 25                                  | Graphic summarizing individual study estimates and overall estimate                                                                                                                                                                                                          | 26<br>[FigS1]                             |
| 26                                  | Table giving descriptive information for each study included                                                                                                                                                                                                                 | 29-43<br>[TableS3,<br>TableS4]            |
| 27                                  | Results of sensitivity testing (eg, subgroup analysis)                                                                                                                                                                                                                       | 20,24,48<br>[Table2,<br>Fig2,<br>TableS6] |
| 28                                  | Indication of statistical uncertainty of findings                                                                                                                                                                                                                            | 20-21<br>[Table2,<br>Table 3]             |

| Item No                                 | Recommendation                                                                                                            | Reported on Page No |
|-----------------------------------------|---------------------------------------------------------------------------------------------------------------------------|---------------------|
| Reporting of discussion should include  |                                                                                                                           |                     |
| 29                                      | Quantitative assessment of bias (eg, publication bias)                                                                    | 8-9, 13-15          |
| 30                                      | Justification for exclusion (eg, exclusion of non-English language citations)                                             | 15                  |
| 31                                      | Assessment of quality of included studies                                                                                 | 13,15               |
| Reporting of conclusions should include |                                                                                                                           |                     |
| 32                                      | Consideration of alternative explanations for observed results                                                            | 14-15               |
| 33                                      | Generalization of the conclusions (ie, appropriate for the data presented and within the domain of the literature review) | 15                  |
| 34                                      | Guidelines for future research                                                                                            | 15                  |
| 35                                      | Disclosure of funding source                                                                                              | 1                   |

From: Stroup DF, Berlin JA, Morton SC, et al, for the Meta-analysis Of Observational Studies in Epidemiology (MOOSE) Group. Meta-analysis of Observational Studies in Epidemiology. A Proposal for Reporting. *JAMA*. 2000;283(15):2008-2012. doi: 10.1001/jama.283.15.2008.

# BMJ Open

## Estimation of fibrosis progression rates for chronic hepatitis C: a systematic review and meta-analysis update

|                                 |                                                                                                                                                                                                                                                                                                                                                                                                                                                                                                                                                                                                                                                                                                                                                                                                                                                                                                                                                                                                                                                                                                                |
|---------------------------------|----------------------------------------------------------------------------------------------------------------------------------------------------------------------------------------------------------------------------------------------------------------------------------------------------------------------------------------------------------------------------------------------------------------------------------------------------------------------------------------------------------------------------------------------------------------------------------------------------------------------------------------------------------------------------------------------------------------------------------------------------------------------------------------------------------------------------------------------------------------------------------------------------------------------------------------------------------------------------------------------------------------------------------------------------------------------------------------------------------------|
| Journal:                        | <i>BMJ Open</i>                                                                                                                                                                                                                                                                                                                                                                                                                                                                                                                                                                                                                                                                                                                                                                                                                                                                                                                                                                                                                                                                                                |
| Manuscript ID                   | bmjopen-2018-027491.R1                                                                                                                                                                                                                                                                                                                                                                                                                                                                                                                                                                                                                                                                                                                                                                                                                                                                                                                                                                                                                                                                                         |
| Article Type:                   | Research                                                                                                                                                                                                                                                                                                                                                                                                                                                                                                                                                                                                                                                                                                                                                                                                                                                                                                                                                                                                                                                                                                       |
| Date Submitted by the Author:   | 11-Jun-2019                                                                                                                                                                                                                                                                                                                                                                                                                                                                                                                                                                                                                                                                                                                                                                                                                                                                                                                                                                                                                                                                                                    |
| Complete List of Authors:       | Erman, Aysegul; University of Toronto, Toronto Health Economics and Health Technology Assessment (THETA) Collaborative , University Health Network; University of Toronto Leslie Dan Faculty of Pharmacy, Krahn, Murray; University of Toronto, Toronto Health Economics and Health Technology Assessment (THETA) Collaborative , University Health Network; University of Toronto Leslie Dan Faculty of Pharmacy, Hansen, Tawnya; University of Toronto, University Health Network Wong, Josephine; University of Toronto, Toronto Health Economics and Health Technology Assessment (THETA) Collaborative , University Health Network<br>Bielecki, Joanna; University of Toronto, Toronto Health Economics and Technology Assessment (THETA) Collaborative, University Health Network<br>Feld, Jordan; University Health Network<br>Wong, William; University of Waterloo School of Pharmacy; University of Toronto Leslie Dan Faculty of Pharmacy,<br>Grootendorst, Paul; University of Toronto Leslie Dan Faculty of Pharmacy,<br>Thein, Hla-Hla; University of Toronto Dalla Lana School of Public Health |
| <b>Primary Subject Heading</b>: | Gastroenterology and hepatology                                                                                                                                                                                                                                                                                                                                                                                                                                                                                                                                                                                                                                                                                                                                                                                                                                                                                                                                                                                                                                                                                |
| Secondary Subject Heading:      | Gastroenterology and hepatology, Health economics, Health policy, Infectious diseases, Epidemiology                                                                                                                                                                                                                                                                                                                                                                                                                                                                                                                                                                                                                                                                                                                                                                                                                                                                                                                                                                                                            |
| Keywords:                       | fibrosis, cirrhosis, hepatitis C, transition probabilities, prognosis, natural history                                                                                                                                                                                                                                                                                                                                                                                                                                                                                                                                                                                                                                                                                                                                                                                                                                                                                                                                                                                                                         |
|                                 |                                                                                                                                                                                                                                                                                                                                                                                                                                                                                                                                                                                                                                                                                                                                                                                                                                                                                                                                                                                                                                                                                                                |

SCHOLARONE™  
Manuscripts



# Estimation of fibrosis progression rates for chronic hepatitis C: a systematic review and meta-analysis update

Aysegul Erman<sup>\*1,2</sup>, Murray D. Krahn<sup>1,2,3,4</sup>, Tawnya Hansen<sup>3</sup>, Josephine Wong<sup>1</sup>, Joanna M. Bielecki<sup>2</sup>, Jordan J. Feld<sup>5</sup>, William W. L. Wong<sup>1,2,6</sup>, Paul Grootendorst<sup>1</sup>, Hla-Hla Thein<sup>7</sup>.

## Author affiliations:

1. Leslie Dan Faculty of Pharmacy, University of Toronto, Toronto, ON, Canada
2. Toronto Health Economics and Technology Assessment Collaborative (THETA), University of Toronto, Toronto, ON, Canada
3. Department of Medicine, University Health Network, Toronto, ON, Canada
4. Institute of Health Policy, Management, and Evaluation, University of Toronto, Toronto, ON, Canada
5. Toronto Centre for Liver Disease, Sandra Rotman Centre for Global Health, University of Toronto, Toronto, ON, Canada
6. School of Pharmacy, University of Waterloo, Kitchener, ON, Canada
7. Dalla Lana School of Public Health, University of Toronto, Toronto, ON, Canada

**Short title:** Estimation of chronic hepatitis C prognosis

**Key words:** hepatic fibrosis, cirrhosis, hepatitis C, viral hepatitis

**Word count:** 3,865 / 4,000

**Tables and Figures:** 3 Tables and 2 Figures / 5

**Supplementary Tables and Figures:** 9 Tables and 5 Figures

**References:** 40

**\*Corresponding Author:** Aysegul Erman

Address: Toronto Health Economics and Technology Assessment (THETA) Collaborative  
University Health Network  
Toronto General Hospital  
Eaton Building, 10th Floor, Room 248  
200 Elizabeth Street, Toronto, ON M5G 2C4  
e-mail: [aysegul.erman@mail.utoronto.ca](mailto:aysegul.erman@mail.utoronto.ca)

**Author Contributions:** A. Erman conducted the study, collected, analysed and drafted the manuscript. Dr. Krahn and Dr. Thein contributed to the study design, as well as the analysis and interpretation of the results and the drafting of the manuscript. Dr. Feld, Dr. Wong and Dr. Grootendorst contributed to the analysis and interpretation of the results and the drafting of the manuscript. Drs. T. Hansen and J. Wong contributed to data collection and J. Bielecki is a medical librarian who helped to develop and conduct the systematic literature search. All authors contributed in the revision of the manuscript and gave final approval for the version to be published.

**Conflict of Interest:** Dr. Feld has received research support from Abbvie, Gilead Sciences, Janssen and Merck, Abbot and Regulus and consulting fees from Abbvie, Gilead Sciences, Janssen and Merck.

**Acknowledgments:** A. Erman has received a doctoral fellowship from the Canadian Network on Hepatitis C (CanHepC).

**Funding:** There are no funders to report for this submission.

**Data sharing:** All data is provided in the supplement.

**Patient and public involvement:** Patient and public were not involved as this is systematic review of published literature.

## Abbreviations

|       |                                          |
|-------|------------------------------------------|
| HCV   | hepatitis C virus                        |
| CHC   | chronic Hepatitis C                      |
| FPR   | fibrosis progression rate                |
| BMI   | body mass index                          |
| HBV   | hepatitis B virus                        |
| HIV   | human immunodeficiency virus             |
| MMLE  | markov maximum likelihood estimation     |
| ALT   | alanine aminotransferase                 |
| RNA   | ribonucleic acid                         |
| CI    | confidence interval                      |
| IDU   | injection drug user                      |
| RR    | relative risk                            |
| scFPR | stage-constant fibrosis progression rate |



## Abstract

**Objectives:** Mathematical models are increasingly important in planning for the upcoming chronic hepatitis C (CHC) elimination efforts. Such models require reliable natural history inputs to make accurate predictions on health and economic outcomes. Yet, HCV disease progression is known to vary widely in the literature and published inputs are currently outdated. The objectives of this study were to obtain updated estimates of fibrosis progression rates (FPRs) in treatment-naïve CHC patients and to explore sources of heterogeneity.

**Design:** A systematic review was conducted using Ovid-MEDLINE, Ovid-EMBASE, and PubMed databases (January 1990 – January 2018) to identify observational studies of hepatic fibrosis in treatment-naïve CHC patients.

**Outcomes:** Stage-constant FPRs were estimated for each study given the reported fibrosis scores and duration of infection. Stage-specific FPRs (i.e., F0→F1; F1→F2; F2→F3; F3→F4) were estimated using Markov Maximum Likelihood estimation. Estimates were pooled using random-effects meta-analysis and heterogeneity was evaluated by stratification and random-effects meta-regression.

**Results:** The review identified 111 studies involving 131 groups of patients (N=42,693). The pooled stage-constant FPR was 0.094 (95%CI, 0.088-0.100), stage-specific FPRs were F0→F1: 0.107 (95%CI, 0.097-0.118); F1→F2: 0.082 (95%CI, 0.074-0.091); F2→F3: 0.117 (95%CI, 0.107-0.129); F3→F4: 0.116 (95%CI, 0.104-0.131). Stratified analysis revealed substantial variation in progression by study population. Meta-regression indicated associations between progression and infection age, duration, source, viral genotype and study population. Findings indicate that FPRs display substantial heterogeneity across study populations and pooled values from more homogenous subpopulations should be considered when estimating prognosis.

**Conclusions:** This large meta-analysis presents updated prognostic estimates for CHC derived from newer studies using better diagnostic methods and improves estimates for important patient populations in terms of clinical policy (e.g., injection drug users, non-clinical populations, liver clinic patients) and should be a valuable resource for patients, clinicians and clinical policy makers.

## Strengths and limitations of this study

- Our updated meta-analysis is now the largest review of HCV prognosis including English and non-English language observational studies.
- We use Markov maximum likelihood estimation method, which does not rely on the assumption of a linear disease progression to obtain detailed stage-specific estimates of fibrosis progression.
- Further, we restrict our meta-analysis to newer studies using better diagnostic methods compared to earlier reviews; and we present more precise prognostic estimates for important CHC subpopulations in terms of clinical policy (i.e., injection drug users, blood transfusion cohorts, liver clinic patients and non-clinical populations).
- However, findings indicate that FPRs display substantial heterogeneity across study populations and pooled values from more homogenous subpopulations should be considered when estimating prognosis.

## Introduction

An estimated ~1% of the world's population is infected with the Hepatitis C virus (HCV) [1,2]. Chronic HCV (CHC) eventually leads to fibrosis, cirrhosis, advanced liver disease, and death [1,3,4]. The level of CHC-related hepatic fibrosis is typically detected through histology using the METAVIR scoring system with scores ranging from F0 indicating no fibrosis to F4 indicating cirrhosis. Published estimates of CHC prognosis has shown large variability in the rate of fibrosis progression across these stages [5–8].

Fortunately, HCV treatment has been revolutionized by highly effective therapies making elimination a plausible objective. Recently, the World Health Organization (WHO) launched a global strategy to this end, targeting a 90% reduction in new infections, a 65% reduction in liver-related death, a diagnosis rate of 90% and a treatment rate of 80% by 2030. This will necessitate radical expansions in prevention, screening and linkage to care [9].

However, a key challenge to the development of national elimination strategies has been the lack of reliable estimates of local disease burden, HCV prevalence and the prevalence of the undiagnosed population [9]. Currently, the only way to estimate such unknown parameters involves mathematical modeling. For this reason, WHO has been assisting countries through expert consultation and modelling initiatives [9]. Mathematical models are also increasingly important for estimating the health and economic consequences of scaling-up screening and treatment programs. However, these models require reliable natural history inputs to make accurate predictions [10,11]. Yet, HCV disease progression is known to vary widely in the literature and published natural history inputs are currently outdated [5–8].

In general, the variability in HCV disease progression has been attributed to differences in the study population (e.g., liver clinic, blood donors, injection drug users); differences due to study setting (i.e., clinical vs. non-clinical); differences among study subjects with respect to clinical risk factors for disease progression [12–14]; as well as to variation in the methods used for calculating fibrosis progression rates (FPRs) [15].

The established clinical risk factors for rapid progression of hepatic fibrosis include older age, male gender, excessive alcohol use, high body mass index (BMI), and HBV or HIV coinfection [12–14].

1  
2  
3 However, more recent studies have indicated race/ethnicity and viral genotype as possible risk factors as  
4 well [16–20]. Studies have also suggested that patients identified in clinical settings display a more rapid  
5 progression compared to those identified in non-clinical settings, for example by screening programs [5].  
6  
7

8  
9 In terms of methodological variability, studies generally estimate progression using two methods: a direct  
10 method involving serial biopsies, and an indirect method involving a single biopsy and the estimated  
11 duration of infection [15]. Multiple biopsies are less common and often involve patients who need to be  
12 monitored closely for rapid progression; while, the more common indirect method assumes a constant  
13 progression rate from the time of infection despite evidence indicating variability between stages  
14 [5,21,22].  
15  
16  
17  
18  
19  
20

21 To account for stage-specific variation in progression, Yi *et al* [22] have proposed the Markov Maximum  
22 Likelihood Estimation (MMLE) method, which can estimate accurate stage-specific FPRs from  
23 observational studies where only a single biopsy and the estimated duration of infection are available.  
24 This has improved the external validity and accuracy of stage-specific progression estimates by allowing  
25 much larger numbers of single biopsy studies to inform HCV prognosis [22].  
26  
27  
28  
29  
30

31 A previous systematic review from our group has estimated FPRs using this method [5]. This study has  
32 been widely-used in pharmacoeconomic evaluations. However, since its publication, a decade ago, new  
33 prognostic studies have become available, highlighting additional sources of variability (i.e., viral  
34 genotype, race/ethnicity) that merit further investigation [16–19,23,24].  
35  
36  
37  
38  
39

40 Given the availability of new research and the importance of natural history estimates particularly for  
41 informing forthcoming elimination policies, the objectives of this study were: (1) to refine progression  
42 estimates through an updated systematic review of observational studies examining hepatic fibrosis in  
43 treatment naïve HCV-infected individuals and (2) to further explore additional sources of heterogeneity.  
44  
45  
46  
47  
48

## 49 **Materials and methods**

### 50 **Data sources**

51 A systematic literature search was conducted using Ovid MEDLINE, Ovid EMBASE, and PubMed  
52 databases without language restriction by an experienced medical librarian (JB) [original: January 1990-  
53  
54  
55  
56  
57  
58  
59  
60

1  
2  
3 August 2007; update: January 2007-January 2018]. Additionally, the search was supplemented by  
4 citation searches and by reviewing references of relevant studies. Search strings for each database are  
5 provided in **Supplemental Methods**.  
6  
7

## 8 9 **Study selection**

10 Records were imported to EndNote X7.7.1 (Thomson Reuters, New York City, NY, USA). After duplicate  
11 removal, potentially relevant studies were screened against eligibility criteria by two independent  
12 reviewers. Disagreements were resolved through discussion.  
13  
14

15 Studies were included if they satisfied the following criteria: (1) CHC defined as the presence of anti-HCV  
16 antibody detected by second or third generation enzyme-linked immunosorbent assay and at least one of  
17 the following: HCV RNA detected by polymerase chain reaction, recombinant immunoblot assay, elevated  
18 alanine aminotransferase (ALT), or liver biopsy; (2) full-length peer-reviewed original observational study;  
19 and (3) no HCV treatment prior to biopsy. Studies involving fewer than 20 cases, post-liver transplant  
20 patients and those where FPRs could not be calculated were excluded. Multiple reports from the same  
21 study were identified by comparing author, year, and sample size. The report with the most complete  
22 information was preferred, if equivalent, then the most recent publication was included.  
23  
24  
25  
26  
27  
28  
29  
30  
31  
32  
33

## 34 **Data extraction**

35 Study, host, viral and liver-disease related information were extracted in duplicate by two independent  
36 reviewers using piloted forms. For non-English studies, native speakers were contacted for help with full-  
37 text review and data extraction processes. A complete list of abstracted data items and all abstracted  
38 data are provided in the **Supplement**. Studies that reported results in subgroups, which may influence  
39 disease progression were extracted separately.  
40  
41  
42  
43  
44  
45

46 Age at HCV acquisition, for studies that did not report this information, was imputed by taking the  
47 difference between age at assessment and the estimated duration of infection. For some studies that  
48 report composite fibrosis stages (e.g., F0/F1), data were distributed 50:50 across F0 and F1. Stage  
49 distribution was not performed when more than two stages were reported collectively (e.g., F0/F1/F2).  
50  
51  
52  
53  
54  
55  
56  
57  
58  
59  
60

1  
2  
3 Definitions used by reviewers and criteria used to convert histological and non-invasive scores to the  
4 METAVIR system are provided in **S1 and S2 Tables** respectively.  
5  
6

## 7 **Study quality**

8  
9  
10 Because the included studies vary widely by study design, population and setting, and since the study  
11 outcomes (i.e., FPRs) were generated using the MMLE method (given the duration of infection and the  
12 fibrosis scores reported in each study), rather than being directly extracted from the included studies,  
13 instead of applying a generic quality appraisal tool, we addressed issues that may bias outcome  
14 measurement and the accuracy of FPR estimation more directly. To improve the accuracy of case  
15 ascertainment, the updated meta-analysis was restricted to newer studies where all participants had  
16 confirmatory RNA testing for CHC. Further, studies were stratified by two independent reviewers by the  
17 mode of infection, which can influence the estimation of the duration of infection, as well as by study  
18 design, setting, and population to address issues around representativeness/generalisability of findings.  
19 The categories were based on the criteria described in **Table S2**. Finally, other clinical factors such as  
20 excess alcohol use and HIV or HBV coinfection among study subjects, which may impact outcomes were  
21 adjusted for using meta-regression analyses.  
22  
23  
24  
25  
26  
27  
28  
29  
30  
31  
32

## 33 **Estimation of fibrosis progression rates**

34  
35  
36 Two methods were used to estimate the annual FPRs for each included study: (1) The stage-constant  
37 FPR was estimated by dividing the total number of transitions in METAVIR units by the person-years of  
38 HCV infection; (2) The stage-specific FPRs (i.e., F0→1, F1→2, F2→3 and F3→F4) were estimated using  
39 the MMLE method [22].  
40  
41  
42  
43

## 44 **Data synthesis**

45  
46 Identified groups were stratified by methodological and clinical subgroups. Estimates were pooled by  
47 random-effects meta-analyses. Time-to-cirrhosis was determined using the pooled stage-specific  
48 progression rates ( $\alpha_s$ ) [5,22]:  
49  
50  
51

$$52 \text{Time-to-cirrhosis} = \left( \frac{1}{\alpha_{01}} + \frac{1}{\alpha_{12}} + \frac{1}{\alpha_{23}} + \frac{1}{\alpha_{34}} \right)$$

1  
2  
3 Finally, the pooled FPRs and their 95% confidence intervals (CI) were used to estimate the mean  
4 cumulative probability of cirrhosis up to 40 years after HCV exposure for clinically important  
5 subpopulations.  
6  
7  
8  
9

## 10 Heterogeneity

11 For all estimates, publication bias, small study effects and heterogeneity were assessed by visual  
12 inspection of funnel plots of the natural log of FPRs against inverse variance. A statistical test for funnel  
13 plot asymmetry was not performed due to presence of significant heterogeneity (**S1 Fig**) [25,26].  
14 Heterogeneity was quantified using the  $I^2$  statistic, with values of 25% and 75% indicating low and high  
15 heterogeneity [27]. Previously identified sources of heterogeneity (e.g., study-related, methodological,  
16 clinical and viral) were explored through stratification and random-effects meta-regression analyses using  
17 a linear mixed model – maximum likelihood method weighted by a multiplicative variance adjustment  
18 factor [5,12–14,18]. Missing values were imputed using the mean values. The natural log of FPRs were  
19 used as the dependent variable.  
20  
21  
22  
23  
24  
25  
26  
27  
28  
29

## 30 Statistical analysis

31 Statistical analysis was conducted using SAS (SAS Inc, Cary, NC, USA) and PROC MIXED and PROC  
32 MIXED ML procedures were used for all meta-analyses and meta-regression analyses. The plots were  
33 generated using RStudio v1.1.383 (RStudio, Boston, MA, USA). A two-sided significance level of 0.05  
34 was used to indicate significance for hypothesis tests.  
35  
36  
37  
38  
39  
40

## 41 Results

### 42 Study selection

43 The current study is an update of a previous review covering the period from January 1990 to August  
44 2007 [5]. The updated literature search (January 2007- January 2018) identified a total 10,440 records  
45 (**Fig 1**). Following duplicate removal, 7,193 abstracts were screened, and 1,304 records were included for  
46 full-text review. Overall, the update identified 45 new studies reporting on 60 new patient groups (24,689  
47 HCV infected subjects) resulting in total of 140 studies and 171 groups of patients (57,810 subjects) in  
48  
49  
50  
51  
52  
53  
54  
55  
56  
57  
58  
59  
60

1  
2  
3 combination with the earlier review. Group-level summary of study and participant characteristics are  
4 provided in **S3 and S4 Tables** respectively.

5  
6  
7 However, the updated meta-analysis was restricted to newer studies where all participants had HCV RNA  
8 testing. After elimination of 40 study groups where RNA status was either missing or unclear, the updated  
9 meta-analysis included 111 studies reporting on 131 groups of patients (42,693 subjects and 723,058  
10 person-years of follow-up time). The study characteristics of the 40 study groups excluded from the meta-  
11 analysis are described in **S5 Table** in the **Supplement**.

## 12 13 14 15 16 17 18 **Study characteristics**

19  
20 The study characteristics of the 131 groups included in the meta-analysis are summarized in **Table 1**. A  
21 majority, 84% (N=110), of the included groups were assessed in a clinical setting (vs. non-clinical).  
22 Compared to the original review, the update identified relatively more patients evaluated in a non-clinical  
23 setting [12% (N=3,068) of original vs. 31% (N=5,392) of new subjects]. In terms of study design, a  
24 majority, 68% (N=88) used a cross-sectional/retrospective vs. a retrospective-prospective study design.  
25 Majority of study groups (124 out of 131) assessed hepatic fibrosis using only histology; only 7 performed  
26 a non-invasive assessment of hepatic fibrosis (6 used LSM and 1 used a combination of invasive and  
27 non-invasive methods).

28  
29 Regarding the patient populations, liver clinic patients were the most frequently studied group (69%). In  
30 total, there were 91 groups of liver clinic patients; 10 of injection drug users (IDUs); 6 of dialysis patients;  
31 5 of females, 4 community, renal transplant recipients and infectious diseases patients; 3 of blood donor  
32 groups; and 2 of pediatric and post-transfusion groups (**Table 1**). Furthermore, the update identified a  
33 total of 10 evaluations of genotype-1, 3 of genotype-3 and 1 each of genotypes 2 and 4 infected groups.

## 34 35 36 37 38 39 40 41 42 43 44 45 46 47 **Clinical characteristics of study subjects**

48  
49 The clinical characteristics of subjects are summarized in **S6 Table**. The majority of the subjects were  
50 male (62%) and white (69%). The mean age at assessment of liver fibrosis was 44 years, the mean age  
51 at infection was 26 years and the mean duration of infection of 18 years. The average prevalence of  
52 excess alcohol use was 20%. Injection drug use accounted for 43% and blood transfusion for 26% of  
53  
54  
55  
56  
57  
58  
59  
60



1  
2  
3 infections. Cirrhosis was present in 12%. The majority, of the subjects (76%) had an elevated ALT. The  
4 mean ALT of all subjects was 88IU/L. In terms of viral genotype, the average prevalence of genotype-1  
5 was 56%, genotype-3 was 18%. On average, 2% of subjects were coinfecting with HIV and 0.4% with  
6  
7  
8  
9 HBV.

### 11 Overall fibrosis progression rates

12  
13 The pooled stage-constant FPR was 0.094 (95%CI, 0.088-0.100) METAVIR units per year (**Table 2**). The  
14 stage-specific FPR estimates were generally lower for transitioning between F0→F1 (0.107; 95%CI,  
15 0.097-0.118) and F1→F2 (0.082; 95%CI, 0.074-0.091); relative to F2→F3 (0.117; 95%CI, 0.107-0.129)  
16  
17 and F3→F4 (0.116; 95%CI, 0.104-0.131). Overall, the estimated time-to-cirrhosis was 39 years. The  $I^2$ -  
18  
19  
20  
21  
22  
23  
24  
25  
26  
27  
28  
29  
30  
31  
32  
33  
34  
35  
36  
37  
38  
39  
40  
41  
42  
43  
44  
45  
46  
47  
48  
49  
50  
51  
52  
53  
54  
55  
56  
57  
58  
59  
60  
The pooled FPRs stratified by study update are provided in **S7 Table**. Forrest plots of the pooled stage-  
specific FPRs are provided in figures **S2-S5 Fig** in the **Supplement**.

### Stratification by study setting and design

Time-to-cirrhosis estimates indicated a faster progression to cirrhosis in groups initially identified in a  
clinical vs. non-clinical setting (37 vs. 47 years) (**Table 2**). In terms of study design, there was only a small  
difference in progression among cross-sectional/retrospective vs. retrospective-prospective design (38 vs.  
41 years), which was lost following adjustment for covariates (**S8 Table**). The cumulative probability of  
cirrhosis by study setting is presented in **Fig 2**.

### Stratification by study population

Time-to-cirrhosis estimates indicated a relatively slower progression to cirrhosis for the female (74 years),  
blood donor (63 years), pediatric (45 years), and post transfusion cohorts (44 years) and a faster  
progression for infectious diseases (19 years), renal transplant (24 years), dialysis (35 years), community  
(35 years) and IDU (37 years) populations relative to liver clinic populations (40 years) (**Table 2**).

In general, simple stratification by study population was able to explain heterogeneity in estimates  
primarily for the later stages of disease. However, a high level of heterogeneity persisted for liver clinic,

1  
2  
3 IDU and community groups. The unadjusted cumulative probability of cirrhosis for different study  
4 populations are displayed in **Fig 2**.

5  
6  
7 Based on time-to-cirrhosis estimates derived from covariate-adjusted FPRs, female (52 years), blood  
8 donor (55 years) and post-transfusion (44 years) groups maintained a relatively slower progression, while  
9 pediatric groups (36 years) displayed a slightly faster progression relative to liver clinic populations (38  
10 years) (**S8 Table**). Infectious diseases (34 years) and community (33 years) groups maintained a  
11 relatively faster progression following adjustments, while the covariate-adjusted progression was  
12 somewhat comparatively slower for dialysis patients (47 years), renal transplant (39 years) and IDUs (40  
13 years).  
14  
15  
16  
17  
18  
19  
20  
21

### 22 **Stratification by publication year**

23  
24 Based on unadjusted time-to-cirrhosis estimates, earlier studies (< year 2000) indicated a slower  
25 progression to cirrhosis (49 years) vs. studies published after 2000 (**Table 2**). This was also apparent  
26 following covariate adjustment (**S8 Table**).  
27  
28  
29

### 30 **Stratification by age and duration of infection**

31  
32 In terms of age, groups with a younger mean age at assessment (<40 years) displayed a faster  
33 progression to cirrhosis (33 years) vs. an older age ( $\geq 40$ ) (40 years) (**Table 2**). While groups with an  
34 older age at infection ( $\geq 30$  years) displayed a more rapid progression (20-28 years) relative to a younger  
35 age (< 30 years) (42-45 years). Fibrosis also progressed faster (17 years) in groups with a shorter  
36 duration of infection (< 10 years).  
37  
38  
39  
40  
41  
42

### 43 **Stratification by viral genotype**

44  
45 Regarding viral genotype, groups infected with viral genotype-1 displayed a much slower progression to  
46 cirrhosis vs. genotype-3 (59 vs. 30 years) (**Table 2**). Slower progression for genotype-1 vs. genotype-3  
47 groups remained following covariate adjustments (43 vs. 34 years) (**S8 Table**). In the stratified analysis,  
48 genotype-3 groups exhibited considerably less heterogeneity vs. genotype-1. The unadjusted cumulative  
49 probability of cirrhosis for genotypes 1 and 3 are displayed in **Fig 2**.  
50  
51  
52  
53  
54

### 55 **Univariate analysis**

1  
2  
3 In the univariate analyses, most clinical covariates displayed an association with at least one progression  
4 estimate except for HIV coinfection, male sex, white and Asian race (**S9 Table**). For more advanced  
5 stages of disease, genotype-1 was associated with a slower progression to advanced fibrosis (F2→F3;  
6 RR=0.53) and to cirrhosis (F3→F4; RR=0.39); while, genotype-3 was associated with faster progression  
7 to cirrhosis (RR=2.62). Additionally, injection drug related infections displayed faster (RR=1.65) and black  
8 race slower progression (RR=0.47) to cirrhosis.

9  
10  
11  
12  
13  
14  
15 Regarding study-related factors, studies conducted in a non-clinical setting (vs. clinical) indicated a slower  
16 progression in the earlier stages of disease (RR=0.68-0.75). In terms of study population, relative to liver  
17 clinic patients, IDUs (RR=1.72) and infectious diseases groups (RR=2.26), displayed a faster and females  
18 (RR=0.46) displayed a slower progression to cirrhosis. For earlier stages, dialysis, renal transplant and  
19 infectious diseases populations all exhibited a faster (RR=2.12-2.54) and females again displayed a  
20 slower progression (RR=0.45). Many covariates (e.g., infectious diseases, females, genotype 3) were  
21 also associated with the overall progression (scFPR).

## 22 23 24 25 26 27 28 29 30 **Multivariable analysis**

31 After adjusting for multiple covariates (**Table 3**), the duration of infection remained independently  
32 associated with slower progression for all FPRs (RR=0.94-0.97). Age at infection was also independently  
33 associated with faster progression between F1→F2 (RR=1.03) and with overall progression (scFPR;  
34 RR=1.01). Similarly, blood transfusion-related infection displayed faster progression from F0→F1  
35 (RR=2.37) and in overall progression (scFPR; RR=1.63). Regarding viral genotype, following adjustment  
36 for covariates, genotype-1 was significantly associated with a slower progression between F2→F3  
37 (RR=0.58) and faster progression from F0→F1 (RR=1.61). No significant association was observed for  
38 viral genotype-3 or for ethnicity. In terms of study-related factors, only dialysis populations maintained a  
39 significant association after covariate-adjustment, exhibiting a slower progression vs. liver clinic patients,  
40 at early stages (F1→F2; RR=0.58). Based on the adjusted-R<sup>2</sup>, covariates explained ~38-56% of the  
41 heterogeneity in the stage-specific FPR estimates and 87% in the stage-constant estimate.

42  
43  
44  
45  
46  
47  
48  
49  
50  
51  
52  
53  
54  
55  
56  
57  
58  
59  
60

## Discussion

Our large systematic review of HCV natural history presents updated and refined estimates of CHC-related hepatic fibrosis progression in treatment naïve patients. Overall, the updated estimates were generally consistent with previous studies and indicated an average time-to-cirrhosis of ~39 years [5,14,28]. However, the current study found a slightly slower progression compared to our previous analysis, especially at the earliest stage of fibrosis [5]. This is possibly because the updated review included more studies where patients were identified through screening efforts in non-clinical settings, and thus involved less symptomatic patients when compared to the original study.

In general, the current update improves upon our previous analysis by focusing on more recent studies where CHC was confirmed by better diagnostic methods and by incorporating substantially more subjects identified in a non-clinical setting (8,460 vs. 3,068) and more IDU populations (5,132 vs. 670) thereby providing more precise estimates of progression for these important subpopulations. Further, we identified study population as an important source of heterogeneity indicating that population-specific estimates should be considered when estimating prognosis. With respect to the IDU population, based on the 10 groups identified, we found a faster average time-to-cirrhosis for this population (37 years), when compared to our earlier estimate (40 years), and to a previous review, which used similar methods (46 years) [29]. Following covariate adjustments, the progression was slightly slower (40 years); this could be due to the inclusion of more genotype-3 infected individuals in the present study.

In our updated analysis we also further explored the effects of viral genotype and race/ethnicity on prognosis. Univariate analyses identified genotype-3 as a predictor of faster and genotype-1 a predictor of slower progression from advanced fibrosis to cirrhosis. Similarly, a previous meta-analysis of stage-constant FPR also found a faster progression for genotype-3 vs non-3 groups [18]. Due to the small number of studies a meta-regression could not be used to explore confounders in that study. In our large meta-regression, genotype-1 displayed a faster progression at the earliest but a slower progression at more advanced stages of fibrosis. Similarly, univariate analysis also indicated a slower progression from significant fibrosis to cirrhosis for black race and female populations in agreement with previous studies; [20,24,30] although these relationships were lost upon covariate adjustment.

1  
2  
3 To help describe the differences in disease progression across the different groups, our updated analysis  
4 used the covariate-adjusted stage-specific fibrosis progression rates to estimate the average expected  
5 time-to-cirrhosis for each group. After adjustment for confounders, we found that time-to-cirrhosis was 43  
6 years for genotype-1 vs. 34 years for genotype-3 groups. In general, adjusted progressions were slower  
7 for the blood donors (55 years), females (52 years), Black patients (46 years) and generally faster for  
8 IDUs (40 years), infectious diseases units and community patients (~34 years) and Asian populations (29  
9 years).

10  
11 Our study is limited in several ways. We excluded reports where the data on infection duration were not  
12 available. Thus, the results may not be generalizable to individuals with an unknown source of infection.  
13 Moreover, estimates based on self-report such as, the duration of infection, alcohol and drug use, may  
14 suffer from recall bias. Studies in IDUs suggest that there may exist a median lag of ~3 years between the  
15 first year of drug use and HCV-infection [17,31]. Therefore, the accuracy of the estimates of infection  
16 duration may vary by the mode of infection [32], resulting in a possible underestimation of FPRs for IDUs.  
17 Additionally, alcohol use tends to be inconsistently reported. Finally, aggregated analyses may suffer from  
18 ecological fallacy [33]. It is also important to note that although newer non-invasive methods are replacing  
19 biopsy, non-invasive prognosis currently remains limited making biopsy-based stage-specific estimates  
20 the most suitable method for representing the natural history of HCV at the current time [34].

21  
22 Finally, our analyses identified substantial heterogeneity, especially among earlier vs. later stages of  
23 fibrosis. This is not surprising as published estimates are known to vary extensively. While we have  
24 explained some of this variation, it is possible that some heterogeneity is also related to sampling  
25 variability associated with biopsies, though, non-invasive estimates also demonstrate considerable  
26 variability [34]. Other sources of variation may include obesity, steatosis, insulin resistance or genetic  
27 factors that can moderate fibrogenesis, which remain largely unreported in the literature [35–39].  
28 Furthermore,  $I^2$ -statistic, which measures the extent of variation due to heterogeneity vs. sampling error  
29 may be inflated when study sizes are large or sampling error is low as in our case [40].

30  
31 Our study also has significant strengths: (1) it is the largest meta-analysis of HCV prognosis including  
32 English and non-English language studies; (2) it uses the MMLE method to obtain detailed stage-specific

1  
2  
3 estimates of HCV prognosis in treatment naïve patients, a method that does not rely on the assumption of  
4 linear disease progression; (3) compared to our original study, the current update improves the precision  
5 of prognostic estimates for important patient groups in terms of clinical-policy (i.e., asymptomatic patients  
6 identified in non-clinical settings through screening efforts, injection drug users, blood transfusion  
7 populations, liver clinic patients); (4) our update was also restricted to more recent studies where CHC is  
8 identified using better diagnostic tests; (5) further, the large numbers of included studies has allowed for  
9 us to explain ~38-87% of the apparent heterogeneity in progression; and finally, (6) we present natural  
10 history data that can be easily applied to mathematical models for estimating HCV prevalence, disease  
11 burden, resource utilization, budget impact and cost-effectiveness, all of which will be necessary for  
12 planning appropriate elimination programs in the near future. Furthermore, given the level of  
13 heterogeneity identified across studies, our updated analysis suggests that pooled progression estimates  
14 from more homogenous subpopulations should be considered when estimating prognosis in policy  
15 models.

16  
17  
18  
19  
20  
21  
22  
23  
24  
25  
26  
27  
28  
29 In Conclusion, the accurate estimation of HCV disease progression remains important in the era of HCV  
30 elimination particularly due to existing policy question around elimination strategies, which necessitate  
31 modeling-based methods to help inform policy. The current study is now the largest and most detailed  
32 review of HCV prognosis, which presents more precise prognostic estimates for important subpopulations  
33 in terms of clinical policy and should be a valuable resource for clinicians, patients and particularly clinical  
34 policy makers.  
35  
36  
37  
38  
39  
40  
41  
42  
43  
44  
45  
46  
47  
48  
49  
50  
51  
52  
53  
54  
55  
56  
57  
58  
59  
60

## References

- 1 Wasley A, Alter MJ. Epidemiology of Hepatitis C: Geographic Differences and Temporal Trends. *Semin Liver Dis* 2000;**Volume 20**:0001–16. doi:10.1055/s-2000-9506
- 2 Blach S, Zeuzem S, Manns M, *et al.* Global prevalence and genotype distribution of hepatitis C virus infection in 2015: a modelling study. *Lancet Gastroenterol Hepatol* Published Online First: 2017. doi:10.1016/S2468-1253(16)30181-9
- 3 Alter MJ. Epidemiology of hepatitis C. *Hepatology* 1997;**26**:62S-65S. doi:10.1002/hep.510260711
- 4 Charlton M. Hepatitis C Infection in Liver Transplantation. *Am. J. Transplant.* 2001;**1**:197–203. doi:10.1034/j.1600-6143.2001.001003197.x
- 5 Thein H-HH, Yi Q, Dore GJ, *et al.* Estimation of stage-specific fibrosis progression rates in chronic hepatitis C virus infection: A meta-analysis and meta-regression. *Hepatology* 2008;**48**:418–31. doi:10.1002/hep.22375
- 6 Poynard T, Ratzu V, Charlotte F, *et al.* Rates and risk factors of liver fibrosis progression in patients with chronic hepatitis C. *J Hepatol* 2001;**34**:730–9. doi:10.1016/S0168-8278(00)00097-0
- 7 McCaughan GW, George J. Fibrosis progression in chronic hepatitis C virus infection. *Gut.* 2004;**53**:318–21. doi:10.1136/gut.2003.026393
- 8 Wiese M, Fischer J, Lobermann M, *et al.* Evaluation of liver disease progression in the German hepatitis C virus (1b)-contaminated anti-D cohort at 35 years after infection. *Hepatology* 2014;**59**:49–57. doi:10.1002/hep.26644
- 9 Papatheodoridis G V., Hatzakis A, Cholongitas E, *et al.* Hepatitis C: The beginning of the end—key elements for successful European and national strategies to eliminate HCV in Europe. *J. Viral Hepat.* 2018;**25**:6–17. doi:10.1111/jvh.12875
- 10 Sweeting MJ, De Angelis D, Brant LJ, *et al.* The burden of hepatitis C in England. *J Viral Hepat* 2007;**14**:570–6. doi:10.1111/j.1365-2893.2007.00851.x
- 11 Trubnikov M, Yan P, Archibald C. Estimated prevalence of hepatitis C virus infection in Canada, 2011. *Canada Commun Dis Rep* 2014;**40**:429–36.
- 12 Poynard T, Bedossa P, Opolon P. Natural history of liver fibrosis progression in patients with chronic hepatitis C. The OBSVIRC, METAVIR, CLINIVIR, and DOSVIRC groups. *Lancet* 1997;**349**:825–32.
- 13 Marcellin P, Asselah T, Boyer N. Fibrosis and disease progression in hepatitis C. [Review] [63 refs]. *Hepatology* 2002;**36**:S47–56. doi:10.1002/hep.1840360707
- 14 Freeman AJ, Dore GJ, Law MG, *et al.* Estimating progression to cirrhosis in chronic hepatitis C virus infection. *Hepatology* 2001;**34**:809–16. doi:10.1053/jhep.2001.27831
- 15 Poynard, T., Ratzu, V., Benmanov, Y., Di Martino, V., Bedossa, P., & Opolon P. Fibrosis in patients with chronic hepatitis C: detection and significance. *Semin Liver Dis vol 20, no 1* 2000;**20**:47–56.
- 16 Goossens N, Negro F. Is genotype 3 of the hepatitis C virus the new villain? *Hepatology* 2014;**59**:2403–12. doi:10.1002/hep.26905
- 17 Rüeger S, Bochud P-Y, Dufour J-F, *et al.* Impact of common risk factors of fibrosis progression in chronic hepatitis C. *Gut* 2015;**64**:1605–15. doi:10.1136/gutjnl-2014-306997
- 18 Probst A, Dang T, Bochud M, *et al.* Role of hepatitis C virus genotype 3 in liver fibrosis progression—a systematic review and meta-analysis. *J Viral Hepat* 2011;**18**:745–59. doi:10.1111/j.1365-2893.2011.01481.x



- 1  
2  
3 19 Bochud P-Y, Cai T, Overbeck K, *et al.* Genotype 3 is associated with accelerated fibrosis  
4 progression in chronic hepatitis C. *J Hepatol* 2009;**51**:655–66. doi:10.1016/j.jhep.2009.05.016  
5  
6 20 Crosse K, Umeadi OG, Anania F a, *et al.* Racial differences in liver inflammation and fibrosis  
7 related to chronic hepatitis C. *Clin Gastroenterol Hepatol* 2004;**2**:463–8.  
8  
9 21 Datz C, Cramp M, Haas T, *et al.* The natural course of hepatitis C virus infection 18 years after an  
10 epidemic outbreak of non-A, non-B hepatitis in a plasmapheresis centre. *Gut* 1999;**44**:563–7.  
11 doi:10.1136/gut.44.4.563  
12  
13 22 Yi Q, Wang PP, Krahn M. Improving the accuracy of long-term prognostic estimates in hepatitis C  
14 virus infection. *J Viral Hepat* 2004;**11**:166–74. doi:10.1046/j.1365-2893.2003.00484.x  
15  
16 23 Terrault NA, Im K, Boylan R, *et al.* Fibrosis progression in African Americans and Caucasian  
17 Americans with chronic hepatitis C. *Clin Gastroenterol Hepatol* 2008;**6**:1403–11.  
18 doi:10.1016/j.cgh.2008.08.006  
19  
20 24 Wiley TE, Brown J, Chan J. Hepatitis C infection in African Americans: its natural history and  
21 histological progression. *Am J Gastroenterol* 2002;**97**:700–6. doi:10.1111/j.1572-  
22 0241.2002.05555.x  
23  
24 25 Higgins JP, Green S, editors. *Cochrane Handbook for Systematic Reviews of Interventions*.  
25 Chichester, UK: : John Wiley & Sons, Ltd 2008. doi:10.1002/9780470712184  
26  
27 26 Ioannidis JPA, Trikalinos TA. The appropriateness of asymmetry tests for publication bias in meta-  
28 analyses: A large survey. *CMAJ* Published Online First: 2007. doi:10.1503/cmaj.060410  
29  
30 27 Higgins JPT, Thompson SG, Deeks JJ, *et al.* Measuring inconsistency in meta-analyses. *BMJ Br*  
31 *Med J* 2003;**327**:557–60. doi:10.1136/bmj.327.7414.557  
32  
33 28 Sweeting MJ, De Angelis D, Neal KR, *et al.* Estimated progression rates in three United Kingdom  
34 hepatitis C cohorts differed according to method of recruitment. *J Clin Epidemiol* 2006;**59**:144–52.  
35 doi:10.1016/j.jclinepi.2005.06.008  
36  
37 29 Smith DJ, Combellick J, Jordan AE, *et al.* Hepatitis C virus (HCV) disease progression in people  
38 who inject drugs (PWID): A systematic review and meta-analysis. *Int. J. Drug Policy*.  
39 2015;**26**:911–21. doi:10.1016/j.drugpo.2015.07.004  
40  
41 30 Terrault NA, Im K, Boylan R, *et al.* Fibrosis progression in African Americans and Caucasian  
42 Americans with chronic hepatitis C. *Clin Gastroenterol Hepatol* 2008;**6**:1403–11.  
43 doi:10.1016/j.cgh.2008.08.006  
44  
45 31 Hagan H, Thiede H, Des Jarlais DC. Hepatitis C Virus Infection Among Injection Drug Users.  
46 *Epidemiology* 2004;**15**:543–9. doi:10.1097/01.ede.0000135170.54913.9d  
47  
48 32 Bruden DL, McMahon BJ, Hennessy TW, *et al.* Estimating the date of hepatitis C virus infection  
49 from patient interviews and antibody tests on stored sera. *Am J Gastroenterol* 2004;**99**:1517–22.  
50 doi:10.1111/j.1572-0241.2004.30826.x  
51  
52 33 Thompson SG, Higgins JPT. How should meta-regression analyses be undertaken and  
53 interpreted? *Stat Med* 2002;**21**:1559–73. doi:10.1002/sim.1187  
54  
55 34 Erman A, Sathya A, Nam A, *et al.* Estimating Chronic Hepatitis C Prognosis Using Transient  
56 Elastography-Based Liver Stiffness: A Systematic Review and Meta-Analysis. *J Viral Hepat*  
57 2018;**25**:502–13. doi:10.1111/jvh.12846  
58  
59 35 Patin E, Kutalik Z, Guergnon J, *et al.* Genome-wide association study identifies variants  
60 associated with progression of liver fibrosis from HCV infection. *Gastroenterology* 2012;**143**.  
doi:10.1053/j.gastro.2012.07.097  
61  
62 36 Paris AJ, Snapir Z, Christopherson CD, *et al.* A polymorphism that delays fibrosis in hepatitis C  
63 promotes alternative splicing of AZIN1, reducing fibrogenesis. *Hepatology* 2011;**54**:2198–207.  
doi:10.1002/hep.24608



- 1  
2  
3 37 Lo Iacono O, Venezia G, Petta S, *et al.* The impact of insulin resistance, serum adipocytokines  
4 and visceral obesity on steatosis and fibrosis in patients with chronic hepatitis C. *Aliment*  
5 *Pharmacol Ther* 2007;**25**:1181–91.  
6  
7 38 Fartoux L, Poujol-Robert A, Guéchet J, *et al.* Insulin resistance is a cause of steatosis and fibrosis  
8 progression in chronic hepatitis C. *Gut* 2005;**54**:1003–8. doi:10.1136/gut.2004.050302  
9  
10 39 Hui JM, Sud A, Farrell GC, *et al.* Insulin Resistance Is Associated with Chronic Hepatitis C and  
11 Virus Infection Fibrosis Progression. *Gastroenterology* 2003;**125**:1695–704.  
12 doi:10.1053/j.gastro.2003.08.032  
13  
14 40 Rücker G, Schwarzer G, Carpenter JR, *et al.* Undue reliance on I2 in assessing heterogeneity may  
15 mislead. *BMC Med Res Methodol* 2008;**8**. doi:10.1186/1471-2288-8-79  
16  
17  
18  
19  
20  
21  
22  
23  
24  
25  
26  
27  
28  
29  
30  
31  
32  
33  
34  
35  
36  
37  
38  
39  
40  
41  
42  
43  
44  
45  
46  
47  
48  
49  
50  
51  
52  
53  
54  
55  
56  
57  
58  
59  
60

**Table 1: Summary of subgroups included in the meta-analysis**

|                                        | Updated Review<br>(1990-2018) |        | Original Review<br>(1990-2007) |        | New Groups<br>(2007-2018) |        |
|----------------------------------------|-------------------------------|--------|--------------------------------|--------|---------------------------|--------|
|                                        | N                             | SS     | N                              | SS     | N                         | SS     |
| <b>All groups</b>                      | 131                           | 42,693 | 81                             | 25,492 | 50                        | 17,201 |
| <b>Study setting</b>                   |                               |        |                                |        |                           |        |
| Clinical                               | 110                           | 34,233 | 70                             | 22,424 | 40                        | 11,809 |
| Non-clinical                           | 21                            | 8,460  | 11                             | 3,068  | 10                        | 5,392  |
| <b>Study design</b>                    |                               |        |                                |        |                           |        |
| Cross-sectional/Retrospective          | 88                            | 29,088 | 72                             | 22,921 | 16                        | 6,167  |
| Retrospective-Prospective              | 43                            | 13,605 | 9                              | 2,571  | 34                        | 11,034 |
| <b>Study population</b>                |                               |        |                                |        |                           |        |
| Females                                | 5                             | 1,420  | 4                              | 1,400  | 1                         | 20     |
| Blood donors                           | 3                             | 408    | 2                              | 223    | 1                         | 185    |
| Pediatric patients                     | 2                             | 223    | 0                              | .      | 2                         | 223    |
| Post transfusion                       | 2                             | 509    | 1                              | 469    | 1                         | 40     |
| Liver clinic                           | 91                            | 32,524 | 61                             | 21,338 | 30                        | 11,186 |
| Injection drug users                   | 10                            | 5,132  | 4                              | 670    | 6                         | 4,462  |
| Community                              | 4                             | 1,451  | 3                              | 1,044  | 1                         | 407    |
| Dialysis patients                      | 6                             | 408    | 3                              | 191    | 3                         | 217    |
| Renal transplant                       | 4                             | 179    | 3                              | 157    | 1                         | 22     |
| Infectious diseases                    | 4                             | 439    | 0                              | .      | 4                         | 439    |
| <b>Publication year</b>                |                               |        |                                |        |                           |        |
| <2000                                  | 4                             | 629    | 4                              | 629    | 0                         | 0      |
| 2000 to <2005                          | 56                            | 16,460 | 54                             | 16,309 | 2                         | 151    |
| 2005 to <2010                          | 37                            | 12,041 | 23                             | 8,554  | 14                        | 3,487  |
| ≥2010                                  | 34                            | 13,563 | 0                              | .      | 34                        | 13,563 |
| <b>Age at assessment</b>               |                               |        |                                |        |                           |        |
| Age <40                                | 23                            | 5,540  | 13                             | 2,166  | 10                        | 3,374  |
| Age ≥ 40                               | 108                           | 37,153 | 68                             | 23,326 | 40                        | 13,827 |
| <b>Estimated age at Infection</b>      |                               |        |                                |        |                           |        |
| <20 years                              | 11                            | 2,318  | 4                              | 662    | 7                         | 1,656  |
| 30 to <40 years                        | 95                            | 35,926 | 64                             | 21,576 | 31                        | 14,350 |
| 20 to <30 years                        | 19                            | 3,864  | 13                             | 3,254  | 6                         | 610    |
| ≥40 years                              | 6                             | 585    | 0                              | .      | 6                         | 585    |
| <b>Estimated duration of infection</b> |                               |        |                                |        |                           |        |
| <10 years                              | 8                             | 834    | 2                              | 212    | 6                         | 622    |
| 10 to <20 years                        | 71                            | 21,949 | 50                             | 13,800 | 21                        | 8,149  |
| ≥ 20 years                             | 52                            | 19,910 | 29                             | 11,480 | 23                        | 8,430  |
| <b>HCV genotype</b>                    |                               |        |                                |        |                           |        |
| Genotype 1                             | 10                            | 3,000  | 5                              | 1,854  | 5                         | 1,146  |
| Genotype 2                             | 1                             | 90     | 0                              | .      | 1                         | 90     |
| Genotype 3                             | 3                             | 1,426  | 0                              | .      | 3                         | 1,426  |
| Genotype 4                             | 1                             | 117    | 0                              | .      | 1                         | 117    |

Table 1. Summary of subgroups included in the meta-analysis. The meta-analysis was restricted to 131 study groups (81 from the original review and 50 new groups) where CHC was confirmed by HCV RNA testing in all subjects. *Abbreviations: N: number of groups included in the meta-analysis; SS: total sample size in each group.; CHC: chronic hepatitis C.*

Table 2: Random-effects meta-analysis of hepatic fibrosis progression rates stratified by CHC subgroups

|                                        | N   | F0 → F1 |        |                |     | F1 → F2 |        |                |      | F2 → F3 |        |                |      | F3 → F4 |        |                |      | scFPR |        |                |      | TTC* (yrs) |
|----------------------------------------|-----|---------|--------|----------------|-----|---------|--------|----------------|------|---------|--------|----------------|------|---------|--------|----------------|------|-------|--------|----------------|------|------------|
|                                        |     | Mean    | 95% CI | I <sup>2</sup> |     | Mean    | 95% CI | I <sup>2</sup> |      | Mean    | 95% CI | I <sup>2</sup> |      | Mean    | 95% CI | I <sup>2</sup> |      | Mean  | 95% CI | I <sup>2</sup> |      |            |
| <b>All groups</b>                      | 131 | 0.107   | 0.097  | 0.118          | 98% | 0.082   | 0.074  | 0.091          | 97%  | 0.117   | 0.107  | 0.129          | 94%  | 0.116   | 0.104  | 0.131          | 89%  | 0.094 | 0.088  | 0.100          | 85%  | 39         |
| <b>Study setting</b>                   |     |         |        |                |     |         |        |                |      |         |        |                |      |         |        |                |      |       |        |                |      |            |
| Clinical                               | 110 | 0.114   | 0.103  | 0.126          | 98% | 0.086   | 0.077  | 0.096          | 98%  | 0.118   | 0.106  | 0.132          | 93%  | 0.119   | 0.105  | 0.133          | 89%  | 0.097 | 0.091  | 0.103          | 82%  | 37         |
| Non-clinical                           | 21  | 0.077   | 0.058  | 0.104          | 98% | 0.065   | 0.053  | 0.081          | 96%  | 0.111   | 0.088  | 0.139          | 91%  | 0.101   | 0.068  | 0.150          | 94%  | 0.076 | 0.036  | 0.150          | 90%  | 47         |
| <b>Study design</b>                    |     |         |        |                |     |         |        |                |      |         |        |                |      |         |        |                |      |       |        |                |      |            |
| Cross-sectional/Retrospective          | 88  | 0.114   | 0.101  | 0.129          | 98% | 0.082   | 0.072  | 0.094          | 98%  | 0.119   | 0.107  | 0.133          | 93%  | 0.120   | 0.105  | 0.136          | 87%  | 0.097 | 0.090  | 0.104          | 84%  | 38         |
| Retrospective-Prospective              | 43  | 0.093   | 0.079  | 0.110          | 98% | 0.082   | 0.071  | 0.094          | 96%  | 0.114   | 0.094  | 0.138          | 95%  | 0.110   | 0.087  | 0.140          | 92%  | 0.088 | 0.078  | 0.098          | 85%  | 41         |
| <b>Study population**</b>              |     |         |        |                |     |         |        |                |      |         |        |                |      |         |        |                |      |       |        |                |      |            |
| Females                                | 5   | 0.048   | 0.026  | 0.088          | 97% | 0.051   | 0.043  | 0.061          | 27%* | 0.071   | 0.049  | 0.103          | 47%* | 0.051   | 0.025  | 0.106          | 46%* | 0.053 | 0.036  | 0.078          | 53%* | 74         |
| Blood donors                           | 3   | 0.067   | 0.017  | 0.264          | 96% | 0.051   | 0.020  | 0.128          | 82%  | 0.094   | 0.018  | 0.487          | 83%  | 0.057   | 0.009  | 0.340          | 55%* | 0.065 | 0.028  | 0.152          | 42%* | 63         |
| Pediatric patients                     | 2   | 0.201   | 0.074  | 0.550          | 0%* | 0.087   | 0.015  | 0.506          | 56%* | 0.096   | 0.107  | 0.125          | 87%  | 0.055   | 0.028  | 0.585          | 0%*  | 0.133 | 0.009  | 1.984          | 0%*  | 45         |
| Post transfusion                       | 2   | 0.065   | 0.034  | 0.125          | 0%* | 0.079   | 0.002  | 2.593          | 80%  | 0.114   | 0.038  | 0.341          | 0%*  | 0.134   | 0.033  | 0.545          | 0%*  | 0.081 | 0.028  | 0.230          | 0%*  | 44         |
| Liver clinic                           | 91  | 0.106   | 0.095  | 0.118          | 98% | 0.082   | 0.072  | 0.092          | 98%  | 0.111   | 0.100  | 0.123          | 94%  | 0.112   | 0.100  | 0.127          | 88%  | 0.092 | 0.087  | 0.099          | 65%* | 40         |
| Injection drug users                   | 10  | 0.109   | 0.071  | 0.168          | 99% | 0.071   | 0.052  | 0.096          | 96%  | 0.121   | 0.086  | 0.170          | 92%  | 0.194   | 0.135  | 0.278          | 84%  | 0.094 | 0.072  | 0.123          | 88%  | 37         |
| Community                              | 4   | 0.134   | 0.082  | 0.218          | 94% | 0.088   | 0.047  | 0.164          | 96%  | 0.111   | 0.074  | 0.167          | 83%  | 0.133   | 0.065  | 0.271          | 88%  | 0.104 | 0.086  | 0.125          | 22%* | 35         |
| Dialysis patients                      | 6   | 0.121   | 0.060  | 0.244          | 95% | 0.074   | 0.047  | 0.116          | 69%* | 0.250   | 0.114  | 0.547          | 71%* | 0.114   | 0.069  | 0.189          | 0%*  | 0.100 | 0.068  | 0.148          | 20%* | 35         |
| Renal transplant                       | 4   | 0.225   | 0.094  | 0.540          | 89% | 0.173   | 0.070  | 0.426          | 84%  | 0.190   | 0.074  | 0.490          | 64%* | 0.117   | 0.041  | 0.331          | 0%*  | 0.190 | 0.076  | 0.475          | 60%* | 24         |
| Infectious diseases                    | 4   | 0.144   | 0.084  | 0.247          | 89% | 0.211   | 0.145  | 0.307          | 48%* | 0.273   | 0.096  | 0.774          | 89%  | 0.256   | 0.047  | 1.379          | 92%  | 0.171 | 0.097  | 0.302          | 68%* | 19         |
| <b>Publication year</b>                |     |         |        |                |     |         |        |                |      |         |        |                |      |         |        |                |      |       |        |                |      |            |
| <2000                                  | 4   | 0.068   | 0.030  | 0.154          | 96% | 0.049   | 0.024  | 0.103          | 84%  | 0.124   | 0.058  | 0.264          | 48%* | 0.172   | 0.058  | 0.513          | 48%* | 0.068 | 0.033  | 0.143          | 61%* | 49         |
| 2000 to <2005                          | 56  | 0.119   | 0.101  | 0.140          | 98% | 0.076   | 0.064  | 0.091          | 98%  | 0.116   | 0.101  | 0.132          | 91%  | 0.122   | 0.106  | 0.140          | 79%  | 0.095 | 0.087  | 0.105          | 83%  | 38         |
| 2005 to <2010                          | 37  | 0.096   | 0.081  | 0.113          | 98% | 0.085   | 0.074  | 0.097          | 94%  | 0.100   | 0.085  | 0.117          | 92%  | 0.092   | 0.074  | 0.114          | 89%  | 0.087 | 0.078  | 0.097          | 82%  | 43         |
| ≥2010                                  | 34  | 0.106   | 0.088  | 0.129          | 98% | 0.096   | 0.080  | 0.116          | 97%  | 0.143   | 0.113  | 0.181          | 96%  | 0.137   | 0.102  | 0.184          | 95%  | 0.102 | 0.090  | 0.116          | 86%  | 34         |
| <b>Age at assessment</b>               |     |         |        |                |     |         |        |                |      |         |        |                |      |         |        |                |      |       |        |                |      |            |
| Age<40                                 | 23  | 0.128   | 0.096  | 0.172          | 98% | 0.088   | 0.069  | 0.112          | 96%  | 0.142   | 0.114  | 0.177          | 86%  | 0.141   | 0.105  | 0.189          | 80%  | 0.113 | 0.095  | 0.134          | 78%  | 33         |
| Age≥40                                 | 108 | 0.103   | 0.093  | 0.114          | 98% | 0.081   | 0.072  | 0.091          | 98%  | 0.113   | 0.102  | 0.125          | 94%  | 0.113   | 0.099  | 0.127          | 90%  | 0.091 | 0.085  | 0.097          | 84%  | 40         |
| <b>Estimated age at infection</b>      |     |         |        |                |     |         |        |                |      |         |        |                |      |         |        |                |      |       |        |                |      |            |
| <20 years                              | 11  | 0.097   | 0.060  | 0.155          | 98% | 0.061   | 0.044  | 0.085          | 94%  | 0.118   | 0.082  | 0.170          | 84%  | 0.108   | 0.065  | 0.179          | 77%  | 0.083 | 0.063  | 0.110          | 75%* | 45         |
| 20 to <30 years                        | 95  | 0.100   | 0.090  | 0.112          | 98% | 0.075   | 0.068  | 0.084          | 98%  | 0.104   | 0.095  | 0.115          | 93%  | 0.109   | 0.096  | 0.124          | 90%  | 0.088 | 0.083  | 0.094          | 83%  | 42         |
| 30 to <40 years                        | 19  | 0.128   | 0.100  | 0.164          | 97% | 0.127   | 0.099  | 0.163          | 95%  | 0.177   | 0.136  | 0.229          | 91%  | 0.146   | 0.115  | 0.185          | 75%* | 0.124 | 0.104  | 0.146          | 79%  | 28         |
| ≥40 years                              | 6   | 0.200   | 0.143  | 0.278          | 82% | 0.147   | 0.090  | 0.239          | 83%  | 0.234   | 0.094  | 0.584          | 91%  | 0.246   | 0.098  | 0.619          | 78%  | 0.160 | 0.108  | 0.237          | 52%* | 20         |
| <b>Estimated duration of infection</b> |     |         |        |                |     |         |        |                |      |         |        |                |      |         |        |                |      |       |        |                |      |            |
| <10 years                              | 8   | 0.218   | 0.162  | 0.295          | 90% | 0.175   | 0.118  | 0.261          | 87%  | 0.290   | 0.136  | 0.619          | 89%  | 0.314   | 0.157  | 0.629          | 62%* | 0.209 | 0.168  | 0.258          | 0%*  | 17         |
| 10 to <20 years                        | 71  | 0.128   | 0.113  | 0.145          | 98% | 0.081   | 0.070  | 0.094          | 98%  | 0.130   | 0.116  | 0.145          | 89%  | 0.133   | 0.117  | 0.152          | 82%  | 0.106 | 0.099  | 0.114          | 75%* | 35         |
| ≥20 years                              | 52  | 0.075   | 0.067  | 0.084          | 97% | 0.075   | 0.067  | 0.084          | 95%  | 0.092   | 0.080  | 0.104          | 89%  | 0.090   | 0.076  | 0.106          | 91%  | 0.076 | 0.071  | 0.081          | 70%* | 49         |
| <b>HCV genotype</b>                    |     |         |        |                |     |         |        |                |      |         |        |                |      |         |        |                |      |       |        |                |      |            |
| Genotype-1                             | 10  | 0.072   | 0.049  | 0.108          | 98% | 0.074   | 0.052  | 0.107          | 96%  | 0.072   | 0.061  | 0.083          | 58%* | 0.056   | 0.029  | 0.107          | 92%  | 0.072 | 0.055  | 0.093          | 83%  | 59         |
| Genotype non-1                         | 6   | 0.096   | 0.065  | 0.142          | 93% | 0.091   | 0.070  | 0.117          | 76%  | 0.102   | 0.069  | 0.149          | 79%  | 0.175   | 0.112  | 0.274          | 63%* | 0.096 | 0.072  | 0.128          | 65%* | 37         |
| Genotype-3                             | 3   | 0.134   | 0.084  | 0.213          | 77% | 0.103   | 0.084  | 0.126          | 2%*  | 0.112   | 0.049  | 0.253          | 83%  | 0.247   | 0.165  | 0.370          | 0%*  | 0.119 | 0.080  | 0.175          | 36%* | 30         |
| Genotype non-3                         | 15  | 0.079   | 0.060  | 0.103          | 98% | 0.079   | 0.062  | 0.102          | 95%  | 0.076   | 0.067  | 0.087          | 66%* | 0.073   | 0.043  | 0.122          | 93%  | 0.077 | 0.065  | 0.092          | 78%  | 52         |

Table 2. Annual fibrosis progression rates based on random-effects meta-analyses. The meta-analysis was restricted to 131 study groups where CHC was confirmed by HCV RNA testing in all subjects. *Abbreviations: scFPR: stage-constant annual progression rate (assuming linear progression from stage F0 to F4); I<sup>2</sup>: the proportion of variability in progression rates due to heterogeneity vs. sampling error; N: number of groups included in the meta-analysis; \*TTC: time-to-cirrhosis (based on unadjusted stage-specific FPRs).* \*Study subgroups with low-to-moderate heterogeneity; \*\*Study populations are ordered by progression from slow to fast based on TTC. Notes: The estimates are not adjusted for covariates and maybe confounded; genotype non-1 and non-3 groups are composed of 65% genotype-3 and 82% genotype-1 respectively; the size of CIs of each subgroup depend on the N. of studies, study size, and the extent of heterogeneity across the studies included in the subgroup.

**Table 3: Random-effects meta-regression of covariates associated with hepatic fibrosis progression rates**

| Covariates                          | F0→F1* |       |              |             | F1→F2* |       |              |             | F2→F3* |       |              |             | F3→F4* |       |              |             | scFPR* |       |              |             |
|-------------------------------------|--------|-------|--------------|-------------|--------|-------|--------------|-------------|--------|-------|--------------|-------------|--------|-------|--------------|-------------|--------|-------|--------------|-------------|
|                                     | β      | SE    | P-value      | RR          |
| Intercept                           | -2.564 | 0.555 | <.0001       |             | -3.482 | 0.675 | <.0001       |             | -1.031 | 0.608 | 0.093        |             | -1.400 | 0.766 | 0.071        |             | -2.438 | 0.312 | <.0001       |             |
| <b>Study design</b>                 |        |       |              |             |        |       |              |             |        |       |              |             |        |       |              |             |        |       |              |             |
| Cross-sectional/Retro (ref)         |        |       |              | 1.00        |        |       |              | 1.00        |        |       |              | 1.00        |        |       |              | 1.00        |        |       |              | 1.00        |
| Retrospective-Prospective           | -0.088 | 0.093 | 0.347        | 0.92        | 0.041  | 0.113 | 0.717        | 1.04        | -0.001 | 0.100 | 0.991        | 1.00        | 0.036  | 0.126 | 0.773        | 1.04        | 0.011  | 0.050 | 0.834        | 1.01        |
| <b>Study population</b>             |        |       |              |             |        |       |              |             |        |       |              |             |        |       |              |             |        |       |              |             |
| Liver clinic (ref)                  |        |       |              | 1.00        |        |       |              | 1.00        |        |       |              | 1.00        |        |       |              | 1.00        |        |       |              | 1.00        |
| Females                             | -0.149 | 0.334 | 0.656        | 0.86        | 0.318  | 0.400 | 0.428        | 1.37        | -0.073 | 0.349 | 0.834        | 0.93        | -0.616 | 0.442 | 0.166        | 0.54        | -0.046 | 0.170 | 0.790        | 0.96        |
| Blood donors                        | -0.040 | 0.256 | 0.875        | 0.96        | -0.318 | 0.314 | 0.313        | 0.73        | -0.276 | 0.289 | 0.342        | 0.76        | -0.707 | 0.395 | 0.076        | 0.49        | -0.175 | 0.166 | 0.296        | 0.84        |
| Pediatric patients                  | 0.361  | 0.475 | 0.449        | 1.43        | 0.831  | 0.567 | 0.145        | 2.30        | -0.054 | 0.521 | 0.918        | 0.95        | -0.199 | 0.750 | 0.791        | 0.82        | 0.479  | 0.307 | 0.121        | 1.61        |
| Post-transfusion                    | -0.343 | 0.407 | 0.402        | 0.71        | -0.206 | 0.493 | 0.676        | 0.81        | -0.143 | 0.466 | 0.760        | 0.87        | -0.853 | 0.651 | 0.192        | 0.43        | -0.093 | 0.282 | 0.742        | 0.91        |
| Injecting drug users                | 0.278  | 0.221 | 0.211        | 1.32        | -0.310 | 0.268 | 0.251        | 0.73        | 0.120  | 0.243 | 0.621        | 1.13        | 0.499  | 0.293 | 0.091        | 1.65        | 0.070  | 0.115 | 0.543        | 1.07        |
| Community                           | 0.226  | 0.209 | 0.283        | 1.25        | 0.167  | 0.248 | 0.503        | 1.18        | 0.016  | 0.204 | 0.938        | 1.02        | 0.192  | 0.241 | 0.428        | 1.21        | 0.125  | 0.087 | 0.154        | 1.13        |
| Dialysis patients                   | -0.121 | 0.203 | 0.551        | 0.89        | -0.550 | 0.248 | <b>0.028</b> | <b>0.58</b> | 0.299  | 0.250 | 0.233        | 1.35        | -0.103 | 0.307 | 0.738        | 0.90        | -0.235 | 0.153 | 0.127        | 0.79        |
| Renal transplant recipients         | -0.012 | 0.236 | 0.961        | 0.99        | 0.262  | 0.285 | 0.359        | 1.30        | 0.064  | 0.274 | 0.815        | 1.07        | -0.372 | 0.412 | 0.368        | 0.69        | 0.164  | 0.191 | 0.390        | 1.18        |
| Infectious diseases                 | -0.261 | 0.241 | 0.282        | 0.77        | 0.304  | 0.294 | 0.304        | 1.35        | 0.264  | 0.257 | 0.305        | 1.30        | 0.211  | 0.314 | 0.502        | 1.24        | -0.013 | 0.139 | 0.924        | 0.99        |
| <b>Publication year</b>             |        |       |              |             |        |       |              |             |        |       |              |             |        |       |              |             |        |       |              |             |
| <2000 (ref)                         |        |       |              | 1.00        |        |       |              | 1.00        |        |       |              | 1.00        |        |       |              | 1.00        |        |       |              | 1.00        |
| 2000 to <2005                       | 0.406  | 0.241 | 0.094        | 1.50        | 0.116  | 0.299 | 0.698        | 1.12        | -0.010 | 0.295 | 0.973        | 0.99        | -0.543 | 0.369 | 0.143        | 0.58        | 0.227  | 0.164 | 0.169        | 1.25        |
| 2005 to <2010                       | 0.492  | 0.242 | <b>0.044</b> | <b>1.64</b> | 0.352  | 0.300 | 0.242        | 1.42        | -0.009 | 0.297 | 0.975        | 0.99        | -0.583 | 0.372 | 0.120        | 0.56        | 0.310  | 0.165 | 0.062        | 1.36        |
| ≥2010                               | 0.404  | 0.246 | 0.103        | 1.50        | 0.356  | 0.306 | 0.246        | 1.43        | 0.227  | 0.301 | 0.451        | 1.26        | -0.500 | 0.377 | 0.187        | 0.61        | 0.369  | 0.166 | <b>0.028</b> | <b>1.45</b> |
| <b>Gender – male†</b>               | 0.592  | 0.437 | 0.178        | 1.81        | 0.704  | 0.520 | 0.179        | 2.02        | -0.103 | 0.454 | 0.822        | 0.90        | -0.157 | 0.564 | 0.781        | 0.85        | 0.289  | 0.217 | 0.186        | 1.34        |
| <b>Age at HCV infection (yrs.)</b>  | 0.004  | 0.011 | 0.698        | 1.00        | 0.033  | 0.013 | <b>0.012</b> | <b>1.03</b> | 0.012  | 0.011 | 0.292        | 1.01        | 0.020  | 0.014 | 0.169        | 1.02        | 0.014  | 0.006 | <b>0.014</b> | <b>1.01</b> |
| <b>Duration of infection (yrs.)</b> | -0.063 | 0.010 | <.0001       | <b>0.94</b> | -0.028 | 0.012 | <b>0.022</b> | <b>0.97</b> | -0.048 | 0.010 | <.0001       | <b>0.95</b> | -0.043 | 0.013 | <b>0.001</b> | <b>0.96</b> | -0.049 | 0.005 | <.0001       | <b>0.95</b> |
| <b>Injecting drug use†</b>          | 0.194  | 0.248 | 0.435        | 1.21        | -0.114 | 0.298 | 0.701        | 0.89        | -0.117 | 0.262 | 0.656        | 0.89        | 0.301  | 0.328 | 0.361        | 1.35        | 0.090  | 0.132 | 0.497        | 1.09        |
| <b>Blood transfusion†</b>           | 0.862  | 0.298 | <b>0.005</b> | <b>2.37</b> | 0.260  | 0.355 | 0.466        | 1.30        | 0.219  | 0.302 | 0.469        | 1.25        | 0.464  | 0.369 | 0.211        | 1.59        | 0.486  | 0.145 | <b>0.001</b> | <b>1.63</b> |
| <b>Excess alcohol use†</b>          | -0.312 | 0.263 | 0.238        | 0.73        | 0.591  | 0.314 | 0.062        | 1.81        | 0.177  | 0.273 | 0.517        | 1.19        | 0.245  | 0.329 | 0.458        | 1.28        | 0.201  | 0.131 | 0.126        | 1.22        |
| <b>HIV positive†</b>                | 0.075  | 0.839 | 0.929        | 1.08        | 0.532  | 1.009 | 0.599        | 1.70        | -0.506 | 0.907 | 0.578        | 0.60        | 0.191  | 1.105 | 0.863        | 1.21        | -0.312 | 0.429 | 0.469        | 0.73        |
| <b>Genotype-1†</b>                  | 0.473  | 0.221 | <b>0.034</b> | <b>1.61</b> | -0.380 | 0.264 | 0.153        | 0.68        | -0.539 | 0.224 | <b>0.018</b> | <b>0.58</b> | -0.313 | 0.274 | 0.256        | 0.73        | -0.051 | 0.108 | 0.637        | 0.95        |
| <b>Genotype-3†</b>                  | 0.226  | 0.277 | 0.416        | 1.25        | 0.036  | 0.331 | 0.914        | 1.04        | -0.273 | 0.285 | 0.341        | 0.76        | 0.194  | 0.347 | 0.577        | 1.21        | 0.093  | 0.133 | 0.487        | 1.10        |
| <b>White†</b>                       | 0.160  | 0.197 | 0.420        | 1.17        | -0.047 | 0.238 | 0.845        | 0.95        | -0.325 | 0.208 | 0.120        | 0.72        | 0.032  | 0.256 | 0.900        | 1.03        | -0.045 | 0.102 | 0.660        | 0.96        |
| <b>Black†</b>                       | -0.302 | 0.273 | 0.272        | 0.74        | 0.332  | 0.330 | 0.317        | 1.39        | -0.011 | 0.287 | 0.970        | 0.99        | -0.609 | 0.356 | 0.089        | 0.54        | -0.005 | 0.139 | 0.971        | 0.99        |
| <b>Asian†</b>                       | 0.086  | 0.354 | 0.808        | 1.09        | 0.268  | 0.431 | 0.534        | 1.31        | 0.003  | 0.404 | 0.994        | 1.00        | 0.933  | 0.534 | 0.083        | 2.54        | 0.061  | 0.242 | 0.800        | 1.06        |
| $I^2_{Res}$                         |        | 96%   |              |             |        | 96%   |              |             |        | 86%   |              |             |        | 77%   |              |             |        |       | 39%          |             |
| Adjusted $R^2$                      |        | 56%   |              |             |        | 38%   |              |             |        | 54%   |              |             |        | 53%   |              |             |        |       | 87%          |             |

Table 3. Linear mixed model-maximum likelihood method. \*Log progression rates. †Proportion. Values in bold indicate statistical significance. Abbreviations: scFPR: stage-constant annual fibrosis progression rates (assuming linear progression from F0 to F4); β: coefficient; SE: standard error; HIV: human immunodeficiency virus; RNA: ribonucleic acid; ref: reference category; adjusted  $R^2$ : the proportion of heterogeneity explained by covariates in the model;  $I^2_{res}$ : the proportion of residual variability due to heterogeneity.

## Figure legends

### **Fig 1. PRISMA flow diagram showing the study selection progress.**

The literature search recovered a total of 5,718 citations. Following duplicate removal and supplementary citation searches, the review process identified a total of 45 new studies reporting on 60 groups of HCV-infected patients. Together with the 95 studies reporting on 111 groups identified by the original review, the current update identified a total of 140 studies of 171 HCV-infected groups of patients. Meta-analysis was restricted to 111 studies reporting on 131 study groups where CHC was confirmed by HCV RNA testing in all subjects.

### **Fig 2. Cumulative probability of cirrhosis for various patient populations.**

Figure showing the cumulative probability of cirrhosis over years of HCV infection for (A) all study groups by estimation method; and groups stratified by (B) study setting; (C) viral genotype; and (D) study population using stage-specific progression rate estimates. Cumulative probabilities are projected using unadjusted estimates and may be confounded. Note: a high degree of heterogeneity is present within the liver clinic, injection drug use and community populations, as well for genotype-1 infected groups and for studies stratified by study setting.

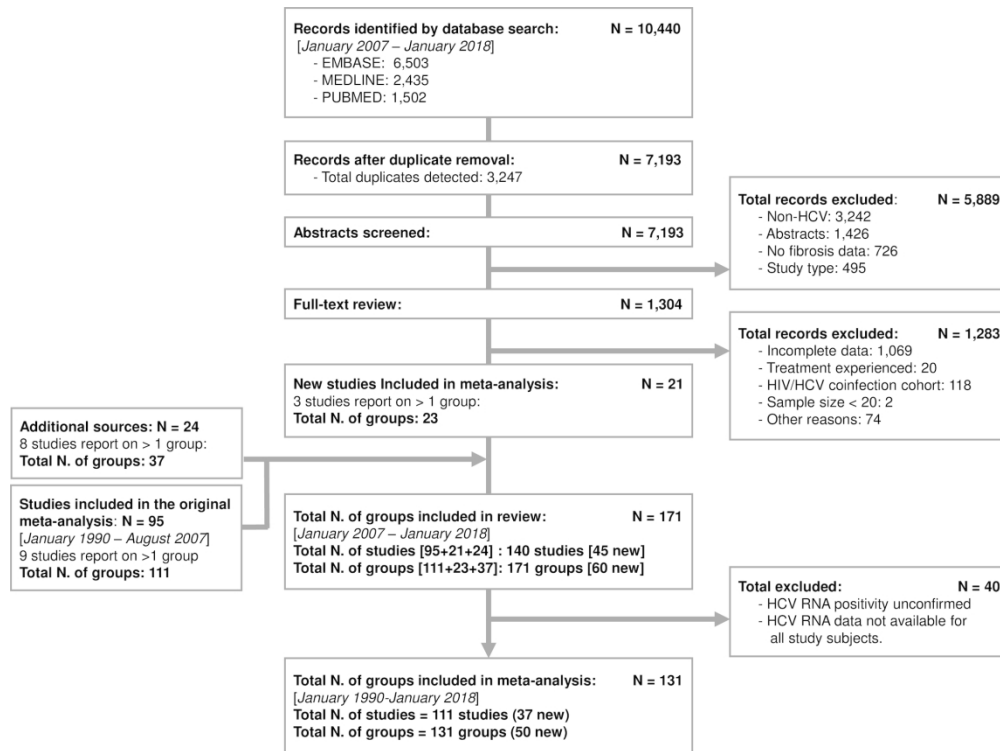

Fig 1. PRISMA flow diagram showing the study selection progress.

The literature search recovered a total of 5,718 citations. Following duplicate removal and supplementary citation searches, the review process identified a total of 45 new studies reporting on 60 groups of HCV-infected patients. Together with the 95 studies reporting on 111 groups identified by the original review, the current update identified a total of 140 studies of 171 HCV-infected groups of patients. Meta-analysis was restricted to 111 studies reporting on 131 study groups where CHC was confirmed by HCV RNA testing in all subjects.

190x142mm (300 x 300 DPI)

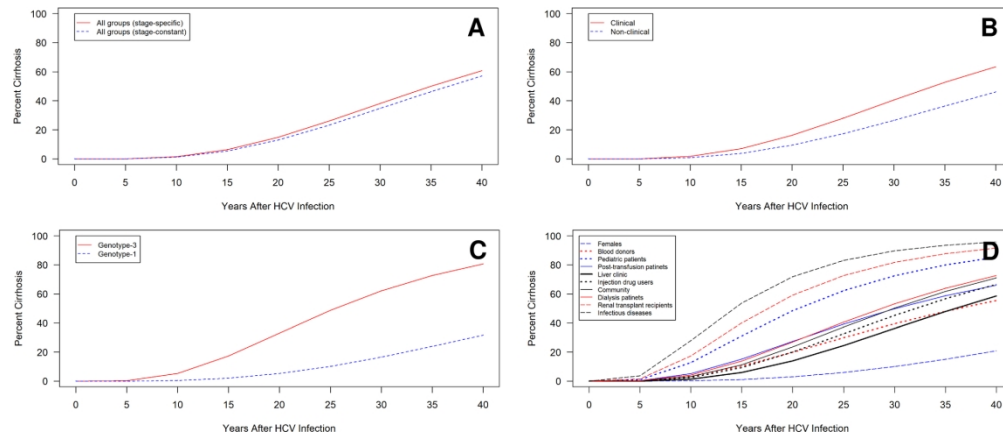

Fig 2. Cumulative probability of cirrhosis for various patient populations. Figure showing the cumulative probability of cirrhosis over years of HCV infection for (A) all study groups by estimation method; and groups stratified by (B) study setting; (C) viral genotype; and (D) study population using stage-specific progression rate estimates. Cumulative probabilities are projected using unadjusted estimates and maybe confounded. Note: high degree of heterogeneity is present within liver

190x80mm (300 x 300 DPI)

## Supplementary Materials

### List of Supplementary Materials:

1. S1 Figure Funnel plots for hepatic fibrosis progression rates.
2. S1 Table: General definitions of study type, setting, and population
3. S2 Table: Fibrosis scoring systems for HCV
4. List of 45 studies identified by updated review
5. S3 Table: Table summarizing study characteristics of the 45 identified studies
6. S4 Table: Table summarizing patient characteristics for the 45 identified
7. S5 Table: Summary of subgroups excluded from the meta-analysis
8. S6 Table: Summary of clinical characteristics of study subjects stratified by review update
9. S7 Table: Hepatic fibrosis progression rates stratified by review update
10. S2 Figure: Forrest plot for fibrosis progression rate from F0 to F1
11. S3 Figure: Forrest plot for fibrosis progression rate from F1 to F2
12. S4 Figure: Forrest plot for fibrosis progression rate from F2 to F3
13. S5 Figure: Forrest plot for fibrosis progression rate from F3 to F4
14. S8 Table: Covariate-adjusted hepatic fibrosis progression rates for CHC subgroups
15. S9 Table: Univariate random effects meta-regression of covariates associated with fibrosis progression
16. Database search strategy and search strings
17. List of extracted data items
18. Supplemental References



## Supplementary Materials

## S1 Figure: Funnel plots for hepatic fibrosis progression rate

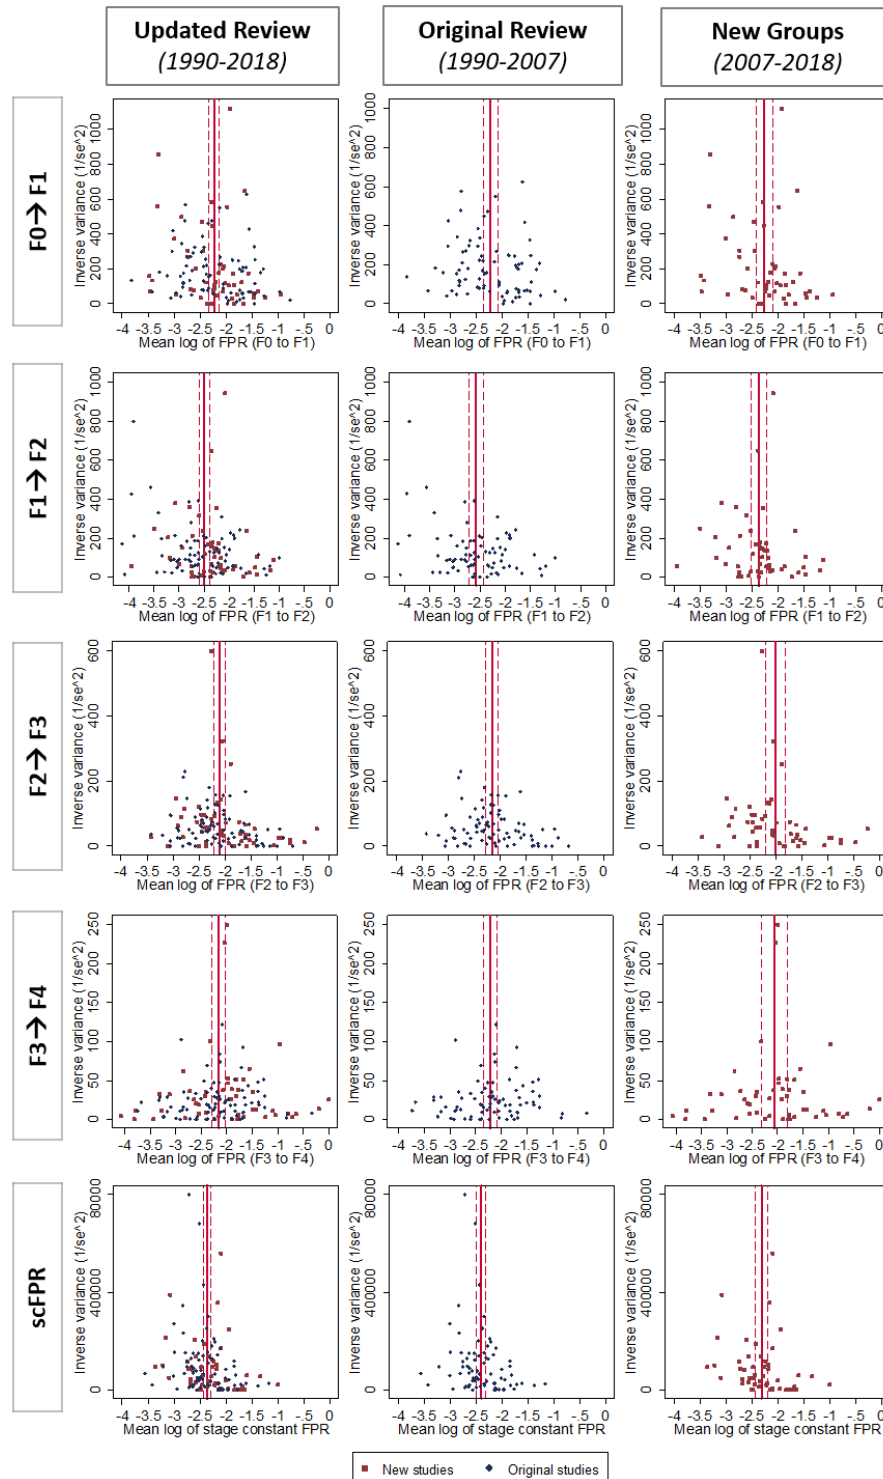

Supplementary Figure 1. Funnel plots of stage-specific and stage-constant (sc) FPRs for the 131 study groups included in the meta-analysis stratified by study update. Funnel plots were generated by plotting the natural log of FPRs against inverse variance.

## Supplementary Materials

S1 Table: General definitions of study type, setting, and population

| <b>Study design</b>                 |                                                                                                                                                                                                                                                                                                                              |
|-------------------------------------|------------------------------------------------------------------------------------------------------------------------------------------------------------------------------------------------------------------------------------------------------------------------------------------------------------------------------|
| Cross-sectional/retrospective:      | Patients with liver disease presenting for clinical care, usually at tertiary care centers, where efforts were made to track the liver disease responsible for the referral back to the presumed time of infection, based on the history of receipt of blood or blood product or of the first use of injection drugs [1–17]. |
| Retrospective-prospective:          | Studies that identify groups of individuals who, in the past, were either asymptomatic or had developed recognized acute hepatitis C following an outbreak of HCV infection from a recognized source, who could be traced retrospectively, recontacted, and then followed-up prospectively [18–41].                          |
| <b>Study setting</b>                |                                                                                                                                                                                                                                                                                                                              |
| Clinical:                           | Individuals who were identified and/or assessed for their HCV status and liver disease in a clinical/tertiary care setting [2,3,12,14–16,20,21,23–26,4,27,30,35,36,38,39,41–44,5–11].                                                                                                                                        |
| Nonclinical:                        | Individuals who were screened for HCV in a nonclinical setting, for example, blood donation center or regional center [1,13,17–19,22,28,29,37,40].                                                                                                                                                                           |
| <b>Study population:</b>            |                                                                                                                                                                                                                                                                                                                              |
| Community:                          | HCV-infected individuals identified or participating in national health screening or studies conducted in nonclinical settings [18,45].                                                                                                                                                                                      |
| Liver clinic:                       | HCV-infected individuals referred to specialist liver clinics for further assessment [1,4,23–27,30,33,35,39,41,9,42,44,11,12,14–16,20,21].                                                                                                                                                                                   |
| Blood donors:                       | Individuals newly diagnosed with chronic HCV infection at blood donor screening [19,37].                                                                                                                                                                                                                                     |
| Dialysis patients:                  | HCV-infected individuals with end-stage renal disease receiving dialysis and awaiting renal transplantation [2,31,34].                                                                                                                                                                                                       |
| Injecting drug users:               | Individuals who acknowledged injection drug use as the main risk factor for HCV infection – not only active users [17,28,29,40,43].                                                                                                                                                                                          |
| Female cohorts:                     | Population of otherwise healthy females infected with HCV [13].                                                                                                                                                                                                                                                              |
| Pediatric population:               | Population of children infected with HCV [10,36].                                                                                                                                                                                                                                                                            |
| Post-transfusion cohorts:           | Population infected with HCV post-transfusion [8,22].                                                                                                                                                                                                                                                                        |
| Renal transplant:                   | Population renal transplant recipients infected with HCV [32,38].                                                                                                                                                                                                                                                            |
| Infectious diseases:                | HCV infected individuals managed at Infectious diseases unit [3,5–7].                                                                                                                                                                                                                                                        |
| <b>General:</b>                     |                                                                                                                                                                                                                                                                                                                              |
| Presumed date of HCV infection      | Date of transfusion of blood or blood products prior to 1992, when serologic screening for HCV became widely available, the first year of injecting drug use, or the date of a single and convincing parenteral exposure (e.g. needle-stick injury).                                                                         |
| Estimated duration of HCV infection | Time elapsed from the presumed date of infection to the date of liver biopsy. Estimated only for individuals with known risk factors.                                                                                                                                                                                        |
| Elevated ALT levels                 | ALT values abnormally elevated (more than the upper limit of normal values) at entry and at least once during the 6 months prior to screening.                                                                                                                                                                               |
| Excess alcohol consumption          | Accepted the definitions reported in the studies. Alcohol consumption of at least more than 20 g/day in the past 12 months of study entry.                                                                                                                                                                                   |

Supplementary Table 1. Abbreviations: HCV: hepatitis C virus; ALT: alanine aminotransferase. References provided for newly identified studies only.

## Supplementary Materials

S2 Table: Fibrosis scoring systems for HCV

| HCV disease severity | Liver Biopsy (LB)                |    |         |       | Transient Elastography (TE)       |       |            |
|----------------------|----------------------------------|----|---------|-------|-----------------------------------|-------|------------|
|                      | Histological Scoring Systems     |    |         |       | Liver Stiffness Measurement (LSM) |       |            |
|                      | METAVIR                          |    | Knodell | Ishak | LSM cut-off (kPa)                 | AUROC | References |
| No fibrosis          | No fibrosis                      | F0 | F0      | 0     | <7.1                              | -     | [46]       |
| Mild fibrosis        | Portal fibrosis without septa    | F1 | F1      | 1     | <7.1                              | -     |            |
| Moderate fibrosis    | Portal fibrosis with rare septa  | F2 | F3      | 2     | 7.1-9.5                           | 0.83  |            |
| Severe fibrosis      | Numerous septa without cirrhosis | F3 | F3      | 3-4   | 9.5-12.5                          | 0.84  |            |
| Cirrhosis            | Cirrhosis                        | F4 | F4      | 5-6   | ≥12.5                             | 0.95  |            |

Supplementary Table 2. Table showing the criteria used to convert various invasive and non-invasive scoring systems to the well-validated METAVIR system. Majority of study groups (124 out of 131 study groups included in the meta-analysis) assessed hepatic fibrosis using histology; only 7 performed a non-invasive assessment of hepatic fibrosis (6 used LSM and 1 used a combination of LSM, LB and APRI). Studies that reported composite scores i.e., F0/F1 were distributed 50:50 across F0 and F1. *Abbreviations: LB: liver biopsy; TE: transient elastography/FibroScan; LSM: liver stiffness measurement; LB: liver biopsy; APRI: AST to platelet ratio index; METAVIR: meta-analysis of histological data in viral hepatitis; AUROC: area under the receiver operator curve.*

## Supplementary Materials

### List of 45 studies identified by the updated review ordered by study ID:

1. Agostini, H., Castera, L., Melin, P., Cattan, L. & Roudot-Thoraval, F. HEPACOM: multicenter, observational prospective study of outcome and monitoring of HCV positive antiviral-naive patients managed in the French health care system. *Gastroenterologie clinique et biologique* **31**, 1074–1080 (2007).
2. Allison, R. D. *et al.* A 25-year study of the clinical and histologic outcomes of hepatitis C virus infection and its modes of transmission in a cohort of initially asymptomatic blood donors. **206**, 654–661 (2012).
3. Boonwaat, L., Haber, P. S., Levy, M. H. & Lloyd, A. R. Establishment of a successful assessment and treatment service for Australian prison inmates with chronic hepatitis C. *Med J Aust* **192**, 496–500 (2010).
4. Bourliere, M. *et al.* Pegylated interferon-alpha2a plus ribavirin for chronic hepatitis C in a real-life setting: the Hepatys French cohort (2003-2007). *Antivir Ther* **17**, 101–110 (2012).
5. Contreras, A. M. *et al.* End-stage renal disease and hepatitis C infection: comparison of alanine aminotransferase levels and liver histology in patients with and without renal damage. *Annals of hepatology* **6**, 48–54 (2007).
6. Delgado-Borrego, A. *et al.* Influence of body mass index on outcome of pediatric chronic hepatitis C virus infection. *J Pediatr Gastroenterol Nutr* **51**, 191–197 (2010).
7. Forestier, N. *et al.* Acoustic radiation force impulse imaging for evaluation of antiviral treatment response in chronic hepatitis C. *J Gastrointest. Liver Dis.* **21**, 367–373 (2012).
8. Goodman, Z. D. *et al.* Pathology of chronic hepatitis C in children: liver biopsy findings in the Peds-C Trial. *Hepatology* **47**, 836–843 (2008).
9. Hui, C.-K. *et al.* Disease progression in Chinese chronic hepatitis C patients with persistently normal alanine aminotransaminase levels. *Alimentary pharmacology & therapeutics* **25**, 1283–1292 (2007).
10. Liu, T. *et al.* Marijuana use in hepatitis C infection does not affect liver biopsy histology or treatment outcomes. **28**, 381–384 (2014).
11. Nanda, K. S. *et al.* Elevated circulating osteoprotegerin and reduced matrix-metalloprotease-9 in post-menopausal women with chronic Hepatitis C virus infection. *Cytokine* **60**, 328–333 (2012).
12. Rao, H.-Y. *et al.* Outcome of hepatitis C virus infection in Chinese paid plasma donors: a 12-19-year cohort study. *Journal of gastroenterology and hepatology* **27**, 526–532 (2012).
13. Siddiqui, F. A. *et al.* Demographics of a large cohort of urban chronic hepatitis C patients. *Hepatology international* **2**, 376–381 (2008).
14. Werner, T. *et al.* Treatment of hepatitis C in renal transplantation candidates: a single-center experience. *Transplantation* **90**, 407–411 (2010).
15. Bochud, P.-Y. *et al.* Genotype 3 is associated with accelerated fibrosis progression in chronic hepatitis C. *J. Hepatol.* **51**, 655–66 (2009).
16. Hissar, S. S. *et al.* Natural history of hepatic fibrosis progression in chronic hepatitis C virus infection in India. *J Gastroenterol Hepatol* **24**, 581–587 (2009).
17. Kallwitz, E. R. *et al.* Ethnicity and body mass index are associated with hepatitis C presentation and progression. *Clin Gastroenterol Hepatol* **8**, 72–78 (2010).
18. Kielland, K. B. *et al.* Liver fibrosis progression at autopsy in injecting drug users infected by hepatitis C: a longitudinal long-term cohort study. *J Hepatol* **60**, 260–266 (2014).
19. Larsen, C. *et al.* Hepatitis C virus genotype 3 and the risk of severe liver disease in a large population of drug users in France. *J Med Virol* **82**, 1647–1654 (2010).

## Supplementary Materials

20. Lawson, A. & Trent Hepatitis, C. S. G. Hepatitis C virus-infected patients with a persistently normal alanine aminotransferase: do they exist and is this really a group with mild disease? *J Viral Hepat* **17**, 51–58 (2010).
21. Marabita, F. *et al.* Genetic variation in the interleukin-28B gene is not associated with fibrosis progression in patients with chronic hepatitis C and known date of infection. *Hepatology* **54**, 1127–1134 (2011).
22. Patin, E. *et al.* Genome-wide association study identifies variants associated with progression of liver fibrosis from HCV infection. *Gastroenterology* **143**, 1212–1244 (2012).
23. Brescini, L. *et al.* Evaluating Liver Fibrosis by Transient Elastometry in Patients With HIV-HCV Coinfection and Mono-infection. *Hepat. Mon.* **14**, e15426 (2014).
24. de Lédighen, V. *et al.* Liver fibrosis on account of chronic hepatitis C is more severe in HIV-positive than HIV-negative patients despite antiretroviral therapy. *J. Viral Hepat.* **15**, 427–33 (2008).
25. Nunnari, G. Circulating fibrocytes as a marker of liver fibrosis in chronic hepatitis C. *Front. Biosci.* **E2**, 1241 (2010).
26. Mazzocato, S. *et al.* Comparison of liver fibrosis progression in HIV / HCV co-infected and HCV mono-infected patients by transient elastometry. **39**, 797–802 (2014).
27. Suárez-Zarracina, T. *et al.* Didanosine (ddl) associates with increased liver fibrosis in adult HIV-HCV coinfecting patients. *J. Viral Hepat.* **19**, 685–93 (2012).
28. White, D. L. *et al.* Higher serum testosterone is associated with increased risk of advanced hepatitis C-related liver disease in males. *Hepatology* **55**, 759–68 (2012).
29. Reggiardo, M. V. *et al.* Natural history of hepatitis C virus infection in a cohort of asymptomatic post-transfused subjects. *Ann. Hepatol.* **11**, 658–66 (2015).
30. Liu, S., Cheng, M., Mu, M. & Yang, Q. [Natural clearance of hepatitis C virus in 96 patients with infection acquired by blood transfusion from a single donor in Guizhou]. *Zhonghua Gan Zang Bing Za Zhi* **22**, 251–4 (2014).
31. Terrault, N. A. *et al.* Fibrosis progression in African Americans and Caucasian Americans with chronic hepatitis C. *Clin Gastroenterol Hepatol* **6**, 1403–1411 (2008).
32. Guyader, D. *et al.* Liver iron is a surrogate marker of severe fibrosis in chronic hepatitis C. *J. Hepatol.* **46**, 587–95 (2007).
33. Pradat, P., Voirin, N., Tillmann, H. L., Chevallier, M. & Trépo, C. Progression to cirrhosis in hepatitis C patients: An age-dependent process. *Liver Int.* **27**, 335–339 (2007).
34. Castéra, L. *et al.* Effect of antiviral treatment on evolution of liver steatosis in patients with chronic hepatitis C: indirect evidence of a role of hepatitis C virus genotype 3 in steatosis. *Gut* **53**, 420–4 (2004).
35. Mathurin, P. Slow progression rate of fibrosis in hepatitis C virus patients with persistently normal alanine transaminase activity. *Hepatology* **27**, 868–872 (1998)
36. Bruden DJ, McMahon BJ, Townshend-Bulson L, et al. Risk of End Stage Liver Disease, Hepatocellular Carcinoma and Liver-Related Death By Fibrosis Stage in the Hepatitis C Alaska Cohort. *Hepatology*. 2017. doi:10.1002/hep.29115.
37. Cepeda JA, Thomas DL, Astemborski J, Kong X, Kirk GD, Mehta SH. Liver disease progression in a community-based sample of HCV-infected PWID. *Top Antivir Med.* 2016;24 (E-1):218.
38. Cepeda JA, Thomas DL, Astemborski J, Sulkowski MS, Kirk GD, Mehta SH. Increased mortality among persons with chronic hepatitis C with moderate or severe liver disease: a cohort study. *Clin Infect Dis.* 2017;10:10. doi:https://dx.doi.org/10.1093/cid/cix207.
39. Sakellariou S, Boletis JN, Sypsa V, Psychogiou M, Tiniakos D, Delladetsima I. Histological features of chronic hepatitis C in haemodialysis patients. *Liver Int.* 2014;34(6):e56-61. doi:https://dx.doi.org/10.1111/liv.12413.
40. Lemos LB, Perez RM, Lemos MM, et al. Hepatitis C in chronic kidney disease: predialysis patients present

## Supplementary Materials

- more severe histological liver injury than hemodialysis patients? *Am J Nephrol.* 2007;27(2):191-196. doi:10.1159/000100892.
41. Delladetsima I, Psychogiou M, Sypsa V, Sakellariou S, Hatzakis A, J NB. Time of acquisition of HCV infection in renal transplant recipients: a major prognostic factor for disease progression. *Clin Transpl.* 2013;27(1):72-79. doi:10.1111/ctr.12012.
42. Besheer T, El-Bendary M, Elalfy H, et al. Prediction of Fibrosis Progression Rate in Patients with Chronic Hepatitis C Genotype 4: Role of Cirrhosis Risk Score and Host Factors. *J Interf Cytokine Res.* 2017;37(3):97-102. doi:10.1089/jir.2016.0111.
43. Midgard H, Hajarizadeh B, Cunningham EB, et al. International Journal of Drug Policy Changes in risk behaviours during and following treatment for hepatitis C virus infection among people who inject drugs : The ACTIVATE study. 2017;47:230-238. doi:10.1016/j.drugpo.2017.05.040.
44. Chen Yi Mei SLG, Thompson AJ, Christensen B, et al. Sustained virological response halts fibrosis progression : A long-term follow-up study of people with chronic hepatitis C infection. *PLoS ONE* 12(10). 2017;12(10):1-12.
45. Valva P, Gismondi MI, Casciato PC, et al. Distinctive intrahepatic characteristics of paediatric and adult pathogenesis of chronic hepatitis C infection. *Clin Microbiol Infect.* 2014;20(12):O998-O1009. doi:10.1111/1469-0691.12728.

NOTE: Studies that reported results in subgroups, which may influence disease progression were extracted separately. Also, Of the 45 identified studies, only studies that established HCV RNA positivity for all study subjects were included in the meta-analysis.

## Supplementary Materials

S3 Table: Table summarizing study characteristics of the 45 identified studies

| Study ID | Study                    | Year | Country   | Language | Population          | Setting      | Design | Study SS | Biopsy SS | Assessment Method | Scoring system | Progression rates                                                                                                                |
|----------|--------------------------|------|-----------|----------|---------------------|--------------|--------|----------|-----------|-------------------|----------------|----------------------------------------------------------------------------------------------------------------------------------|
| 1        | Agostini 2007 [18]       | 2007 | France    | English  | Community           | Non-clinical | R-P    | 3794     | 1283      | LB                | METAVIR        | FPR <sub>0→1</sub> :0.119<br>FPR <sub>1→2</sub> :0.182<br>FPR <sub>2→3</sub> :0.186<br>FPR <sub>3→4</sub> :0.069<br>ScFPR: 0.137 |
| 2        | Allison 2012 [19]        | 2012 | USA       | English  | Blood donor         | Non-clinical | R-P    | 185      | 185       | LB                | Ishak          | FPR <sub>0→1</sub> :0.044<br>FPR <sub>1→2</sub> :0.072<br>FPR <sub>2→3</sub> :0.047<br>FPR <sub>3→4</sub> :0.022<br>ScFPR: 0.050 |
| 3        | Boonwaat 2010 [1]        | 2010 | Australia | English  | Liver clinic/prison | Non-clinical | C-S/R  | 371      | 153       | LB                | METAVIR        | FPR <sub>0→1</sub> :0.085<br>FPR <sub>1→2</sub> :0.114<br>FPR <sub>2→3</sub> :0.148<br>FPR <sub>3→4</sub> :0.047<br>ScFPR: 0.095 |
| 4        | Bourliere 2012 [30]      | 2012 | France    | English  | Liver clinic        | Clinical     | R-P    | 2066     | 1794      | LB                | METAVIR        | FPR <sub>0→1</sub> :0.118<br>FPR <sub>1→2</sub> :0.101<br>FPR <sub>2→3</sub> :0.084<br>FPR <sub>3→4</sub> :0.111<br>ScFPR: 0.100 |
| 5        | Contreras 2007 [2]       | 2007 | Mexico    | English  | Dialysis patients   | Clinical     | C-S/R  | 64       | 64        | LB                | Ishak          | FPR <sub>0→1</sub> :0.113<br>FPR <sub>1→2</sub> :0.205<br>FPR <sub>2→3</sub> :0.103<br>FPR <sub>3→4</sub> :0.123<br>ScFPR: 0.130 |
| 6        | Delgado-Borego 2010 [47] | 2010 | USA       | English  | Pediatric           | Clinical     | C-S/R  | 102      | 102       | LB                | METAVIR        | FPR <sub>0→1</sub> :0.203<br>FPR <sub>1→2</sub> :0.071<br>FPR <sub>2→3</sub> :0.220<br>FPR <sub>3→4</sub> :0.034<br>ScFPR: 0.131 |
| 7        | Forestier 2012 [35]      | 2012 | France    | English  | Liver clinic        | Clinical     | R-P    | 98       | 45        | LB                | METAVIR        | FPR <sub>0→1</sub> :0.208<br>FPR <sub>1→2</sub> :0.122<br>FPR <sub>2→3</sub> :0.123<br>FPR <sub>3→4</sub> :0.219<br>ScFPR: 0.152 |
| 8        | Goodman 2008 [36]        | 2008 | USA       | English  | Pediatric           | Clinical     | R-P    | 121      | 121       | LB                | Knodell        | FPR <sub>0→1</sub> :0.200<br>FPR <sub>1→2</sub> :0.106<br>FPR <sub>2→3</sub> :0.038<br>FPR <sub>3→4</sub> :0.129<br>ScFPR: 0.137 |
| 9        | Hui 2007 [11]            | 2007 | China     | English  | Liver clinic        | Clinical     | C-S/R  | 82       | 53        | LB                | METAVIR        | FPR <sub>0→1</sub> :0.033<br>FPR <sub>1→2</sub> :0.042<br>FPR <sub>2→3</sub> :0.095<br>FPR <sub>3→4</sub> :0.072<br>ScFPR: 0.041 |



## Supplementary Materials

| Study ID | Study              | Year | Country     | Language | Population       | Setting      | Design            | Study SS | Biopsy SS | Assessment Method | Scoring system   | Progression rates                                                                                                                |
|----------|--------------------|------|-------------|----------|------------------|--------------|-------------------|----------|-----------|-------------------|------------------|----------------------------------------------------------------------------------------------------------------------------------|
| 10a      | Liu 2014 – M [12]  | 2014 | Canada      | English  | Liver clinic     | Clinical     | C-S/R             | 102      | 102       | LB                | Batts and Ludwig | FPR <sub>0→1</sub> :0.145<br>FPR <sub>1→2</sub> :0.159<br>FPR <sub>2→3</sub> :0.083<br>FPR <sub>3→4</sub> :0.123<br>ScFPR: 0.130 |
| 10b      | Liu 2014 – M [12]  | 2014 | Canada      | English  | Liver clinic     | Clinical     | C-S/R             | 275      | 275       | LB                | Batts and Ludwig | FPR <sub>0→1</sub> :0.145<br>FPR <sub>1→2</sub> :0.109<br>FPR <sub>2→3</sub> :0.071<br>FPR <sub>3→4</sub> :0.102<br>ScFPR: 0.110 |
| 11       | Nanda 2012 [13]    | 2012 | Ireland     | English  | Female           | Non-clinical | C-S/R             | 20       | 20        | LB                | Ishak            | FPR <sub>0→1</sub> :0.023<br>FPR <sub>1→2</sub> :0.046<br>FPR <sub>2→3</sub> :0.098<br>FPR <sub>3→4</sub> :0.164<br>ScFPR: 0.033 |
| 12       | Rao 2012 [37]      | 2012 | China       | English  | Blood donor      | Non-clinical | R-P               | 348      | 175       | LSM               | METAVIR          | FPR <sub>0→1</sub> :0.054<br>FPR <sub>1→2</sub> :0.082<br>FPR <sub>2→3</sub> :0.116<br>FPR <sub>3→4</sub> :0.113<br>ScFPR: 0.068 |
| 13a      | Siddiqui 2008 [14] | 2008 | USA         | English  | Liver clinic     | Clinical     | C-S/R             | 2035     | 1009      | LB                | METAVIR          | FPR <sub>0→1</sub> :0.077<br>FPR <sub>1→2</sub> :0.088<br>FPR <sub>2→3</sub> :0.143<br>FPR <sub>3→4</sub> :0.138<br>ScFPR: 0.087 |
| 13b      | Siddiqui 2008 [14] | 2008 | USA         | English  | Liver clinic     | Clinical     | C-S/R             | 616      | 356       | LB                | METAVIR          | FPR <sub>0→1</sub> :0.076<br>FPR <sub>1→2</sub> :0.102<br>FPR <sub>2→3</sub> :0.153<br>FPR <sub>3→4</sub> :0.190<br>ScFPR: 0.093 |
| 14       | Werner 2010 [38]   | 2010 | USA         | English  | Renal transplant | Clinical     | R-P               | 22       | 22        | LB                | Batts and Ludwig | FPR <sub>0→1</sub> :0.293<br>FPR <sub>1→2</sub> :0.230<br>FPR <sub>2→3</sub> :0.356<br>FPR <sub>3→4</sub> :0.336<br>ScFPR: 0.277 |
| 15a      | Bochud 2009 [39]   | 2009 | Switzerland | English  | Liver clinic     | Clinical     | <sup>14</sup> R-P | 607      | 607       | LB                | METAVIR          | FPR <sub>0→1</sub> :0.094<br>FPR <sub>1→2</sub> :0.067<br>FPR <sub>2→3</sub> :0.073<br>FPR <sub>3→4</sub> :0.125<br>ScFPR: 0.080 |
| 15b      | Bochud 2009 [39]   | 2009 | Switzerland | English  | Liver clinic     | Clinical     | R-P               | 90       | 90        | LB                | METAVIR          | FPR <sub>0→1</sub> :0.082<br>FPR <sub>1→2</sub> :0.84<br>FPR <sub>2→3</sub> :0.066<br>FPR <sub>3→4</sub> :0.082<br>ScFPR: 0.077  |

Supplementary Table 7 continued



## Supplementary Materials

| Study ID | Study              | Year | Country     | Language | Population   | Setting      | Design | Study SS | Biopsy SS | Assessment Method | Scoring system | Progression rates                                                                                                                |
|----------|--------------------|------|-------------|----------|--------------|--------------|--------|----------|-----------|-------------------|----------------|----------------------------------------------------------------------------------------------------------------------------------|
| 15c      | Bochud 2009 [39]   | 2009 | Switzerland | English  | Liver clinic | Clinical     | R-P    | 312      | 312       | LB                | METAVIR        | FPR <sub>0→1</sub> :0.115<br>FPR <sub>1→2</sub> :0.096<br>FPR <sub>2→3</sub> :0.080<br>FPR <sub>3→4</sub> :0.199<br>ScFPR: 0.101 |
| 15d      | Bochud 2009 [39]   | 2009 | Switzerland | English  | Liver clinic | Clinical     | R-P    | 117      | 117       | LB                | METAVIR        | FPR <sub>0→1</sub> :0.081<br>FPR <sub>1→2</sub> :0.075<br>FPR <sub>2→3</sub> :0.080<br>FPR <sub>3→4</sub> :0.167<br>ScFPR: 0.079 |
| 16       | Hissar 2009 [15]   | 2009 | India       | English  | Liver clinic | Clinical     | C-S/R  | 213      | 213       | LB                | Knodell        | FPR <sub>0→1</sub> :0.253<br>FPR <sub>1→2</sub> :0.166<br>FPR <sub>2→3</sub> :0.220<br>FPR <sub>3→4</sub> :0.160<br>ScFPR: 0.192 |
| 17       | Kallwitz 2010 [16] | 2010 | USA         | English  | Liver clinic | Clinical     | C-S/R  | 812      | 812       | LB                | METAVIR        | FPR <sub>0→1</sub> :0.087<br>FPR <sub>1→2</sub> :0.162<br>FPR <sub>2→3</sub> :0.110<br>FPR <sub>3→4</sub> :0.111<br>ScFPR: 0.099 |
| 18       | Kielland 2014 [40] | 2014 | Norway      | English  | IDU          | Non-clinical | R-P    | 61       | 61        | LB                | METAVIR        | FPR <sub>0→1</sub> :0.122<br>FPR <sub>1→2</sub> :0.022<br>FPR <sub>2→3</sub> :0.448<br>FPR <sub>3→4</sub> :0.270<br>ScFPR: 0.077 |
| 19a      | Larsen 2010 [17]   | 2010 | France      | English  | IDU          | Non-clinical | C-S/R  | 1077     | 493       | LB                | METAVIR        | FPR <sub>0→1</sub> :0.166<br>FPR <sub>1→2</sub> :0.104<br>FPR <sub>2→3</sub> :0.154<br>FPR <sub>3→4</sub> :0.273<br>ScFPR: 0.133 |
| 19b      | Larsen 2010 [17]   | 2010 | France      | English  | IDU          | Non-clinical | C-S/R  | 1986     | 1108      | LB                | METAVIR        | FPR <sub>0→1</sub> :0.138<br>FPR <sub>1→2</sub> :0.065<br>FPR <sub>2→3</sub> :0.106<br>FPR <sub>3→4</sub> :0.267<br>ScFPR: 0.101 |
| 20a      | Lawson 2010 [41]   | 2010 | UK          | English  | Liver clinic | Clinical     | R-P    | 87       | 39        | LB                | Ishak          | FPR <sub>0→1</sub> :0.038<br>FPR <sub>1→2</sub> :0.066<br>FPR <sub>2→3</sub> :0.158<br>FPR <sub>3→4</sub> :0.380<br>ScFPR: 0.049 |
| 20b      | Lawson 2010 [41]   | 2010 | UK          | English  | Liver clinic | Clinical     | R-P    | 1140     | 459       | LB                | Ishak          | FPR <sub>0→1</sub> :0.071<br>FPR <sub>1→2</sub> :0.152<br>FPR <sub>2→3</sub> :0.342<br>FPR <sub>3→4</sub> :0.198<br>ScFPR: 0.108 |

Supplementary Table 7 continued

## Supplementary Materials

| Study ID | Study                         | Year | Country                      | Language | Population          | Setting  | Design | Study SS | Biopsy SS | Assessment Method | Scoring system | Progression rates                                                                                                               |
|----------|-------------------------------|------|------------------------------|----------|---------------------|----------|--------|----------|-----------|-------------------|----------------|---------------------------------------------------------------------------------------------------------------------------------|
| 21       | Marabita 2011 [20]            | 2011 | Italy                        | English  | Liver clinic        | Clinical | R-P    | 247      | 247       | LB                | Ishak          | FPR <sub>0→1</sub> :0.193<br>FPR <sub>1→2</sub> :0.062<br>FPR <sub>2→3</sub> :0.067<br>FPR <sub>3→4</sub> :0.076<br>ScFPR:0.088 |
| 22a      | Patin 2012-French cohort [42] | 2012 | France                       | English  | Liver clinic        | Clinical | R-P    | 467      | 467       | LB                | METAVIR        | FPR <sub>0→1</sub> :0.121<br>FPR <sub>1→2</sub> :0.042<br>FPR <sub>2→3</sub> :0.530<br>FPR <sub>3→4</sub> :0.081<br>ScFPR:0.089 |
| 22b      | Patin 2012-Swiss cohort [42]  | 2012 | Switzerland                  | English  | Liver clinic        | Clinical | R-P    | 694      | 614       | LB                | METAVIR        | FPR <sub>0→1</sub> :0.093<br>FPR <sub>1→2</sub> :0.067<br>FPR <sub>2→3</sub> :0.058<br>FPR <sub>3→4</sub> :0.905<br>ScFPR:0.081 |
| 22c      | Patin 2012-US/France [42]     | 2012 | US/France                    | English  | Liver clinic        | Clinical | R-P    | 320      | 320       | LB                | METAVIR        | FPR <sub>0→1</sub> :0.088<br>FPR <sub>1→2</sub> :0.063<br>FPR <sub>2→3</sub> :0.099<br>FPR <sub>3→4</sub> :0.063<br>ScFPR:0.076 |
| 22d      | Patin 2012-International [42] | 2012 | Australia/<br>Germany/<br>UK | English  | Liver clinic        | Clinical | R-P    | 642      | 642       | LB                | METAVIR        | FPR <sub>0→1</sub> :0.103<br>FPR <sub>1→2</sub> :0.076<br>FPR <sub>2→3</sub> :0.087<br>FPR <sub>3→4</sub> :0.139<br>ScFPR:0.091 |
| 22e      | Patin 2012-Australian [42]    | 2012 | Australia                    | English  | Liver clinic        | Clinical | R-P    | 219      | 219       | LB                | METAVIR        | FPR <sub>0→1</sub> :0.140<br>FPR <sub>1→2</sub> :0.088<br>FPR <sub>2→3</sub> :0.077<br>FPR <sub>3→4</sub> :0.134<br>ScFPR:0.102 |
| 23       | Brescini 2014                 | 2014 | Italy                        | English  | Infectious diseases | Clinical | C-S/R  | 186      | 186       | LSM               | METAVIR        | FPR <sub>0→1</sub> :0.192<br>FPR <sub>1→2</sub> :0.246<br>FPR <sub>2→3</sub> :0.421<br>FPR <sub>3→4</sub> :0.597<br>ScFPR:0.234 |
| 24       | de Ledinghen 2008 [4]         | 2008 | Spain                        | English  | Liver clinic        | Clinical | C-S/R  | 656      | 656       | LSM               | METAVIR        | FPR <sub>0→1</sub> :0.045<br>FPR <sub>1→2</sub> :0.051<br>FPR <sub>2→3</sub> :0.109<br>FPR <sub>3→4</sub> :0.157<br>ScFPR:0.053 |
| 25       | Nunnari 2010 [5]              | 2010 | Italy                        | English  | Infectious diseases | Clinical | C-S/R  | 70       | 70        | LB                | METAVIR        | FPR <sub>0→1</sub> :0.157<br>FPR <sub>1→2</sub> :0.280<br>FPR <sub>2→3</sub> :0.174<br>FPR <sub>3→4</sub> :0.099<br>ScFPR:0.173 |

Supplementary Table 7 continued

## Supplementary Materials

| Study ID | Study                     | Year | Country   | Language | Population          | Setting      | Design | Study SS | Biopsy SS | Assessment Method  | Scoring system | Progression rates                                                                                                               |
|----------|---------------------------|------|-----------|----------|---------------------|--------------|--------|----------|-----------|--------------------|----------------|---------------------------------------------------------------------------------------------------------------------------------|
| 26       | Mazzocato 2014 [6]        | 2014 | Italy     | English  | Infectious diseases | Clinical     | C-S/R  | 115      | 115       | LSM                | METAVIR        | FPR <sub>0→1</sub> :0.172<br>FPR <sub>1→2</sub> :0.192<br>FPR <sub>2→3</sub> :0.658<br>FPR <sub>3→4</sub> :0.905<br>ScFPR:0.216 |
| 27       | Suarez-Zarracina 2012 [7] | 2012 | Spain     | English  | Infectious diseases | Clinical     | C-S/R  | 68       | 68        | LSM                | METAVIR        | FPR <sub>0→1</sub> :0.079<br>FPR <sub>1→2</sub> :0.138<br>FPR <sub>2→3</sub> :0.124<br>FPR <sub>3→4</sub> :0.082<br>ScFPR:0.095 |
| 28       | White 2012 [21]           | 2012 | USA       | English  | Liver clinic        | Clinical     | R-P    | 308      | 308       | FibroSURE-ActiTest | METAVIR        | FPR <sub>0→1</sub> :0.078<br>FPR <sub>1→2</sub> :0.103<br>FPR <sub>2→3</sub> :0.092<br>FPR <sub>3→4</sub> :0.069<br>ScFPR:0.078 |
| 29       | Reggiardo 2012 [22]       | 2012 | Argentina | English  | Blood transfusion   | Non-clinical | R-P    | 40       | 40        | LB                 | METAVIR        | FPR <sub>0→1</sub> :0.075<br>FPR <sub>1→2</sub> :0.050<br>FPR <sub>2→3</sub> :0.128<br>FPR <sub>3→4</sub> :0.017<br>ScFPR:0.066 |
| 30       | Liu 2014 [8]              | 2014 | China     | Chinese  | Blood transfusion   | Clinical     | C-S/R  | 96       | 52        | LSM                | METAVIR        | FPR <sub>0→1</sub> :0.106<br>FPR <sub>1→2</sub> :0.077<br>FPR <sub>2→3</sub> :0.154<br>FPR <sub>3→4</sub> :0.195<br>ScFPR:0.101 |
| 31a      | Terrault 2008 [23]        | 2008 | USA       | English  | Liver clinic        | Clinical     | R-P    | 157      | 157       | LB                 | Ishak          | FPR <sub>0→1</sub> :0.099<br>FPR <sub>1→2</sub> :0.080<br>FPR <sub>2→3</sub> :0.093<br>FPR <sub>3→4</sub> :0.030<br>ScFPR:0.081 |
| 31b      | Terrault 2008 [23]        | 2008 | USA       | English  | Liver clinic        | Clinical     | R-P    | 143      | 143       | LB                 | Ishak          | FPR <sub>0→1</sub> :0.100<br>FPR <sub>1→2</sub> :0.076<br>FPR <sub>2→3</sub> :0.076<br>FPR <sub>3→4</sub> :0.017<br>ScFPR:0.079 |
| 32       | Guyader 2007 [24]         | 2007 | France    | English  | Liver clinic        | Clinical     | R-P    | 586      | 580       | LB                 | METAVIR        | FPR <sub>0→1</sub> :0.075<br>FPR <sub>1→2</sub> :0.085<br>FPR <sub>2→3</sub> :0.136<br>FPR <sub>3→4</sub> :0.221<br>ScFPR:0.085 |
| 33       | Pradat 2007 [25]          | 2007 | France    | English  | Liver clinic        | Clinical     | R-P    | 247      | 247       | LB                 | METAVIR        | FPR <sub>0→1</sub> :0.237<br>FPR <sub>1→2</sub> :0.094<br>FPR <sub>2→3</sub> :0.149<br>FPR <sub>3→4</sub> :0.064<br>ScFPR:0.138 |

Supplementary Table 7 continued

## Supplementary Materials

| Study ID | Study                | Year | Country | Language | Population        | Setting      | Design | Study SS | Biopsy SS | Assessment Method | Scoring system | Progression rates                                                                                                                |
|----------|----------------------|------|---------|----------|-------------------|--------------|--------|----------|-----------|-------------------|----------------|----------------------------------------------------------------------------------------------------------------------------------|
| 34a      | Castera 2004 [26]    | 2004 | France  | English  | Liver clinic      | Clinical     | R-P    | 37       | 37        | LB                | METAVIR        | FPR <sub>0→1</sub> :0.116<br>FPR <sub>1→2</sub> :0.176<br>FPR <sub>2→3</sub> :0.110<br>FPR <sub>3→4</sub> :0.218<br>ScFPR:0.131  |
| 34b      | Castera 2004 [26]    | 2004 | France  | English  | Liver clinic      | Clinical     | R-P    | 114      | 114       | LB                | METAVIR        | FPR <sub>0→1</sub> :0.080<br>FPR <sub>1→2</sub> :0.111<br>FPR <sub>2→3</sub> :0.084<br>FPR <sub>3→4</sub> :0.175<br>ScFPR:0.090  |
| 35a      | Mathurin 1998 [27]   | 1998 | France  | English  | Liver clinic      | Clinical     | R-P    | 102      | 67        | LB                | METAVIR        | FPR <sub>0→1</sub> :0.081<br>FPR <sub>1→2</sub> :0.034<br>FPR <sub>2→3</sub> :0.108<br>FPR <sub>3→4</sub> :0.281<br>ScFPR:0.067  |
| 35b      | Mathurin 1998 [27]   | 1998 | France  | English  | Liver clinic      | Clinical     | R-P    | 102      | 101       | LB                | METAVIR        | FPR <sub>0→1</sub> :0.200<br>FPR <sub>1→2</sub> :0.098<br>FPR <sub>2→3</sub> :0.077<br>FPR <sub>3→4</sub> :0.201<br>ScFPR:0.129  |
| 36       | Bruden 2017[45]      | 2017 | USA     | English  | Community         | Non-clinical | R-P    | 407      | 407       | LB                | Ishak          | FPR <sub>0→1</sub> :0.091<br>FPR <sub>1→2</sub> :0.153<br>FPR <sub>2→3</sub> :0.088<br>FPR <sub>3→4</sub> :0.062<br>ScFPR:0.994  |
| 37       | Cepeda 2016[28]      | 2016 | Indian  | English  | IDU               | Non-clinical | R-P    | 281      | 281       | LSM               | METAVIR        | FPR <sub>0→1</sub> :0.088<br>FPR <sub>1→2</sub> :0.138<br>FPR <sub>2→3</sub> :0.242<br>FPR <sub>3→4</sub> :0.225<br>ScFPR:0.118  |
| 38       | Cepeda 2017[29]      | 2017 | USA     | English  | IDU               | Non-clinical | R-P    | 964      | 964       | LSM               | METAVIR        | FPR <sub>0→1</sub> :0.042<br>FPR <sub>1→2</sub> :0.053<br>FPR <sub>2→3</sub> :0.143<br>FPR <sub>3→4</sub> :0.113<br>ScFPR:0.053  |
| 39       | Sakellariou 2014[34] | 2014 | Greece  | English  | Dialysis patients | Clinical     | R-P    | 61       | 58        | LB                | Ishak          | FPR <sub>0→1</sub> :0.322<br>FPR <sub>1→2</sub> :0.0822<br>FPR <sub>2→3</sub> :0.803<br>FPR <sub>3→4</sub> :0.449<br>ScFPR:0.238 |
| 40a      | Lemos 2007 A[31]     | 2007 | Brazil  | English  | Dialysis patients | Clinical     | R-P    | 39       | 38        | LB                | Ludwig         | FPR <sub>0→1</sub> :0.092<br>FPR <sub>1→2</sub> :0.154<br>FPR <sub>2→3</sub> :0.116<br>FPR <sub>3→4</sub> :0.100<br>ScFPR:0.105  |

Supplementary Table 7 continued

| Study ID | Study | Year | Country | Language | Population | Setting | Design | Study SS | Biopsy SS | Assessment Method | Scoring system | Progression rates |
|----------|-------|------|---------|----------|------------|---------|--------|----------|-----------|-------------------|----------------|-------------------|
|----------|-------|------|---------|----------|------------|---------|--------|----------|-----------|-------------------|----------------|-------------------|

## Supplementary Materials

|     |                       |      |               |         |                      |          |       |     |     |             |         |                                                                                                                                 |
|-----|-----------------------|------|---------------|---------|----------------------|----------|-------|-----|-----|-------------|---------|---------------------------------------------------------------------------------------------------------------------------------|
| 40b | Lemos 2007 B[31]      | 2007 | Brazil        | English | Dialysis patients    | Clinical | R-P   | 117 | 117 | LB          | Ludwig  | FPR <sub>0→1</sub> :0.145<br>FPR <sub>1→2</sub> :0.100<br>FPR <sub>2→3</sub> :0.485<br>FPR <sub>3→4</sub> :0.192<br>ScFPR:0.144 |
| 41  | Delladetsima 2013[32] | 2013 | Greece        | English | Renal transplant     | Clinical | R-P   | 23  | 29  | LB          | Ishak   | FPR <sub>0→1</sub> :0.220<br>FPR <sub>1→2</sub> :0.102<br>FPR <sub>2→3</sub> :0.504<br>FPR <sub>3→4</sub> :0.655<br>ScFPR:0.196 |
| 42  | Besheer 2017[33]      | 2017 | Egypt         | English | Liver clinic         | Clinical | R-P   | 122 | 122 | LB          | METAVIR | FPR <sub>0→1</sub> :0.150<br>FPR <sub>1→2</sub> :0.136<br>FPR <sub>2→3</sub> :0.179<br>FPR <sub>3→4</sub> :0.127<br>ScFPR:0.135 |
| 43  | Midgard 2017[43]      | 2017 | International | English | Injection drug users | Clinical | R-P   | 93  | 122 | LB/LSM/APRI | METAVIR | FPR <sub>0→1</sub> :0.052<br>FPR <sub>1→2</sub> :0.058<br>FPR <sub>2→3</sub> :0.173<br>FPR <sub>3→4</sub> :0.121<br>ScFPR:0.062 |
| 44  | Chen 2017[44]         | 2017 | Australia     | English | Liver clinic         | Clinical | R-P   | 131 | 122 | LB          | METAVIR | FPR <sub>0→1</sub> :0.068<br>FPR <sub>1→2</sub> :0.081<br>FPR <sub>2→3</sub> :0.150<br>FPR <sub>3→4</sub> :0.245<br>ScFPR:0.081 |
| 45  | Valva 2014[9]         | 2014 | Argentina     | English | Liver clinic         | Clinical | C-S/R | 32  | 122 | LB          | METAVIR | FPR <sub>0→1</sub> :0.093<br>FPR <sub>1→2</sub> :0.163<br>FPR <sub>2→3</sub> :0.092<br>FPR <sub>3→4</sub> :0.027<br>ScFPR:0.098 |

Supplementary Table 7 continued

Supplementary Table 3. Table summarizing study characteristics for all 45 studies identified by the updated systematic review. Note: Of these, only studies with subjects that were HCV RNA positive were included in the meta-analysis (RNA data provided in S4 Table). *Abbreviations:* HCV: Hepatitis C virus; C-S/R: cross-sectional/retrospective; R-P: retrospective-prospective; LB: liver biopsy; LSM: liver stiffness measurement; FPR: fibrosis progression rate; scFPR: stage-constant annual fibrosis progression rate (assuming constant progression over F0 to F4).

## Supplementary Materials

S4 Table: Table summarizing patient characteristics for the 45 identified studies

| Study ID | Study               | Age (yrs) | Gender (%Male) | DOI (yrs) | **Excess alcohol use (%) | HCV RNA+ (%) | HCV RNA load (log 10 IU/ml) | Genotype (%)                                    | Mode of Infection (%)             | BMI (kg/m <sup>2</sup> ) | HIV (%) | HBV (%) | METAVIR (%)                                                  | Mean ALT (IU/L) |
|----------|---------------------|-----------|----------------|-----------|--------------------------|--------------|-----------------------------|-------------------------------------------------|-----------------------------------|--------------------------|---------|---------|--------------------------------------------------------------|-----------------|
| 1        | Agostini 2007       | 42.4      | 62.86          | 12.00     | 11.41                    | 100.00       | .                           | GT1: .<br>GT2: .<br>GT3: .<br>GT4: .            | IDU: 65.8<br>BT: 14.4<br>SP: 19.8 | .                        | 10.36   | 0.00    | F0: 24.00<br>F1: 24.01<br>F2: 22.62<br>F3: 22.60<br>F4: 6.76 | .               |
| 2        | Allison 2012        | 43.1      | 50.81          | 25.00     | .                        | 100.00       | 3.32                        | GT1: 73.5<br>GT2: 16.8<br>GT3: 3.8<br>GT4: 1.1  | IDU: 0.0<br>BT: 100<br>SP: 0.0    | 33.76                    | .       | .       | F0: 32.97<br>F1: 26.49<br>F2: 25.95<br>F3: 12.43<br>F4: 2.16 | 70.22           |
| 3        | Boonwaat 2010       | 34.0      | 76.28          | 15.00     | 46.05                    | 100.00       | .                           | GT1: 22.9<br>GT2: 6.7<br>GT3: 23.7<br>GT4: 3.0  | IDU: 62.0<br>BT: 2.2<br>SP: .     | .                        | 4.85    | 8.09    | F0: 28.10<br>F1: 28.76<br>F2: 19.61<br>F3: 18.95<br>F4: 4.58 | .               |
| 4        | Bourliere 2012      | 47.2      | 61.91          | 21.00     | 5.91                     | 100.00       | .                           | GT1: 52.1<br>GT2: 12.3<br>GT3: 24.9<br>GT4: 8.1 | IDU: 39.2<br>BT: 2.2<br>SP: .     | 24.40                    | 5.18    | 1.11    | F0: 8.36<br>F1: 25.08<br>F2: 31.72<br>F3: 17.78<br>F4: 17.06 | .               |
| 5        | Contreras 2007      | 43.5      | 46.88          | 10.32     | 35.94                    | .            | .                           | GT1: .<br>GT2: .<br>GT3: .<br>GT4: .            | IDU: 0.0<br>BT: 100<br>SP: 0.0    | .                        | .       | 0.00    | F0: 31.25<br>F1: 23.44<br>F2: 29.69<br>F3: 10.94<br>F4: 4.69 | 68.58           |
| 6        | Delgado-Borego 2010 | 14.8      | 51.00          | 12.00     | 0.00                     | 100.00       | .                           | GT1: 88.2<br>GT2: 3.9<br>GT3: 6.9<br>GT4: 1.0   | IDU: 2.0<br>BT: 4.0<br>SP: 15.0   | .                        | .       | .       | F0: 8.80<br>F1: 52.00<br>F2: 15.70<br>F3: 20.60<br>F4: 2.90  | .               |
| 7        | Forestier 2012      | 54.0      | 53.06          | 13.00     | .                        | 100.00       | 6.58                        | GT1: 84.7<br>GT2: 3.1<br>GT3: 9.2<br>GT4: 3.1   | IDU: .<br>BT: .<br>SP: .          | 26.00                    | .       | .       | F0: 6.67<br>F1: 33.3<br>F2: 31.11<br>F3: 13.33<br>F4: 15.56  | 59.00           |

## Supplementary Materials

| Study ID | Study         | Age (yrs) | Gender (%Male) | DOI (yrs) | **Excess alcohol use (%) | HCV RNA+ (%) | HCV RNA load (log 10 IU/ml) | Genotype (%)                                   | Mode of Infection (%)             | BMI (kg/m <sup>2</sup> ) | HIV (%) | HBV (%) | METAVIR (%)                                                   | Mean ALT (IU/L) |
|----------|---------------|-----------|----------------|-----------|--------------------------|--------------|-----------------------------|------------------------------------------------|-----------------------------------|--------------------------|---------|---------|---------------------------------------------------------------|-----------------|
| 8        | Goodman 2008  | 9.8       | 56.20          | 9.80      | 0.00                     | 100.00       | .                           | GT1: 82.6<br>GT2: 5.8<br>GT3: 10.7<br>GT4: .   | IDU: 0.0<br>BT: 7.4<br>SP: 14.9   | 20.3                     | 0.00    | 0.00    | F0: 14.05<br>F1: 45.45<br>F2: 34.71<br>F3: 4.13<br>F4: 1.65   | .               |
| 9        | Hui 2007      | 53.7      | 82.93          | 38.00     | .                        | 100.00       | 5.81                        | GT1: 37.8<br>GT2: 7.3<br>GT3: 6.1<br>GT4: .    | IDU: 43.9<br>BT: 34.2<br>SP: 22.0 | 27.94                    | 0.00    | 0.00    | F0: 28.30<br>F1: 30.19<br>F2: 13.21<br>F3: 13.21<br>F4: 15.09 | 33.49           |
| 10a      | Liu 2014 – M  | 43.9      | 77.50          | 14.69     | 27.45                    | 100.00       | 2.70                        | GT1: 81.2<br>GT2: 4.0<br>GT3: 14.9<br>GT4: 0.0 | IDU: 74.0<br>BT: .<br>SP: .       | .                        | 8.85    | .       | F0: 11.9<br>F1: 22.8<br>F2: 38.60<br>F3: 15.80<br>F4: 10.90   | 90.30           |
| 10b      | Liu 2014 - M  | 46.7      | 67.60          | 18.01     | 11.64                    | 100.00       | 2.31                        | GT1: 67.3<br>GT2: 9.5<br>GT3: 14.5<br>GT4: 6.2 | IDU: 53.1<br>BT: .<br>SP: .       | .                        | 1.09    | .       | F0: 7.30<br>F1: 26.9<br>F2: 37.8<br>F3: 6.40<br>F4: 11.60     | 98.00           |
| 11       | Nanda 2012    | 59.0      | 0.00           | 30.00     | .                        | 100.00       | .                           | GT1: 100<br>GT2: 0.0<br>GT3: 0.0<br>GT4: 0.0   | IDU: .<br>BT: 0.0<br>SP: .        | 25.30                    | .       | .       | F0: 50.00<br>F1: 25.00<br>F2: 10.00<br>F3: 5.00<br>F4: 10.00  | .               |
| 12       | Rao 2012      | 53.7      | 44.83          | 25.20     | 21.26                    | 100.00       | 6.22                        | GT1: 75.6<br>GT2: 11.2<br>GT3: .<br>GT4: .     | IDU: 0.0<br>BT: 100<br>SP: 0.0    | .                        | 0.00    | 1.44    | F0: 25.71<br>F1: 25.14<br>F2: 17.71<br>F3: 14.29<br>F4: 17.14 | 45.80           |
| 13a      | Siddiqui 2008 | 50.0      | 56.61          | 22.50     | .                        | 84.00        | .                           | GT1: 57.5<br>GT2: 3.2<br>GT3: 0.9<br>GT4: 0.4  | IDU: 52.6<br>BT: 14.2<br>SP: 20.3 | .                        | .       | 2.80    | F0: 17.74<br>F1: 27.16<br>F2: 17.84<br>F3: 15.66<br>F4: 21.61 | 66.00           |
| 13b      | Siddiqui 2008 | 45.3      | 60.55          | 22.50     | .                        | 82.00        | .                           | GT1: 42.5<br>GT2: 6.5<br>GT3: 9.9<br>GT4: 1.3  | IDU: 45.3<br>BT: 16.9<br>SP: 25.3 | .                        | .       | 3.41    | F0: 18.26<br>F1: 23.31<br>F2: 17.42<br>F3: 13.20<br>F4: 27.81 | 77.00           |

Supplementary Table 8 continued

## Supplementary Materials

| Study ID | Study         | Age (yrs) | Gender (%Male) | DOI (yrs) | **Excess alcohol use (%) | HCV RNA+ (%) | HCV RNA load (log 10 IU/ml) | Genotype (%)                                    | Mode of Infection (%)          | BMI (kg/m <sup>2</sup> ) | HIV (%) | HBV (%) | METAVIR (%)                                                   | Mean ALT (IU/L) |
|----------|---------------|-----------|----------------|-----------|--------------------------|--------------|-----------------------------|-------------------------------------------------|--------------------------------|--------------------------|---------|---------|---------------------------------------------------------------|-----------------|
| 14       | Werner 2010   | 49.1      | 72.73          | 4.43      | .                        | 100.00       | 6.12                        | GT1: 72.7<br>GT2: 13.6<br>GT3: 13.6<br>GT4: 0.0 | IDU: .<br>BT: .<br>SP: .       | .                        | .       | .       | F0: 27.27<br>F1: 40.91<br>F2: 18.18<br>F3: 9.09<br>F4: 4.55   | .               |
| 15a      | Bochud 2009   | 42.0      | 60.00          | 21.00     | 55.02                    | 100.00       | 6.00                        | GT1: 100<br>GT2: 0.0<br>GT3: 0.0<br>GT4: 0.0    | IDU: 49.0<br>BT: 22.0<br>SP: . | 23.90                    | 7.00    | 0.00    | F0: 14.0<br>F1: 37.0<br>F2: 27.0<br>F3: 11.0<br>F4: 11.0      | 66.00           |
| 15b      | Bochud 2009   | 54.0      | 48.00          | 24.00     | 37.78                    | 100.00       | 5.93                        | GT1: 0.0<br>GT2: 100<br>GT3: 0.0<br>GT4: 0.0    | IDU: 11.0<br>BT: 53.0<br>SP: . | 24.90                    | 2.00    | 0.00    | F0: 14.00<br>F1: 27.00<br>F2: 31.00<br>F3: 16.00<br>F4: 12.00 | 45.00           |
| 15c      | Bochud 2009   | 40.0      | 65.00          | 20.00     | 63.14                    | 100.00       | 5.90                        | GT1: 0.0<br>GT2: 0.0<br>GT3: 100<br>GT4: 0.0    | IDU: 66.0<br>BT: 9.0<br>SP: .  | 23.30                    | 7.00    | 0.00    | F0: 10.00<br>F1: 28.00<br>F2: 32.00<br>F3: 11.00<br>F4: 19.00 | 76.00           |
| 15d      | Bochud 2009   | 41.0      | 66.00          | 22.00     | 56.41                    | 100.00       | 5.80                        | GT1: 0.0<br>GT2: 0.0<br>GT3: 0.0<br>GT4: 100    | IDU: 60.0<br>BT: 11.0<br>SP: . | 23.70                    | 7.00    | 0.00    | F0: 17.00<br>F1: 32.00<br>F2: 26.00<br>F3: 10.00<br>F4: 15.00 | 63.00           |
| 16       | Hissar 2009   | 41.6      | 65.26          | 12.10     | 0.00                     | 100.00       | 4.80                        | GT1: 11.7<br>GT2: .<br>GT3: 49.3<br>GT4: 4.7    | IDU: 0.5<br>BT: 76.1<br>SP: .  | .                        | 0.00    | 0.00    | F0: 4.69<br>F1: 25.35<br>F2: 23.94<br>F3: 24.88<br>F4: 21.13  | 118.50          |
| 17       | Kallwitz 2010 | 49.6      | 61.00          | 26.50     | .                        | 100.00       | .                           | GT1: .<br>GT2: .<br>GT3: .<br>GT4: .            | IDU: 36.5<br>BT: 33.5<br>SP: . | 30.10                    | 0.00    | 0.00    | F0: 10.0<br>F1: 10.0<br>F2: 22.50<br>F3: 22.50<br>F4: 35.00   | .               |
| 18       | Kielland 2014 | 37.3      | 74.5           | 17.75     | .                        | 100.00       | .                           | GT1: .<br>GT2: .<br>GT3: .<br>GT4: .            | IDU: 100<br>BT: 0.0<br>SP: 0.0 | .                        | 0.98    | 4.90    | F0: 11.48<br>F1: 68.85<br>F2: 3.28<br>F3: 4.92<br>F4: 11.48   | .               |

Supplementary Table 8 continued



## Supplementary Materials

| Study ID | Study                  | Age (yrs) | Gender (%Male) | DOI (yrs) | **Excess alcohol use (%) | HCV RNA+ (%) | HCV RNA load (log 10 IU/ml) | Genotype (%)                                    | Mode of Infection (%)          | BMI (kg/m <sup>2</sup> ) | HIV (%) | HBV (%) | METAVIR (%)                                                   | Mean ALT (IU/L) |
|----------|------------------------|-----------|----------------|-----------|--------------------------|--------------|-----------------------------|-------------------------------------------------|--------------------------------|--------------------------|---------|---------|---------------------------------------------------------------|-----------------|
| 19a      | Larsen 2010            | 39.0      | 75.00          | 18.00     | 42.62                    | 100.00       | .                           | GT1: 0.0<br>GT2: 0.0<br>GT3: 100<br>GT4: 0.0    | IDU: .<br>BT: .<br>SP: .       | .                        | 4.36    | 1.95    | F0: 6.31<br>F1: 34.34<br>F2: 28.28<br>F3: 15.66<br>F4: 15.40  | .               |
| 19b      | Larsen 2010            | 40.0      | 75.00          | 19.00     | 43.61                    | 100.00       | .                           | GT1: 77.5<br>GT2: 5.9<br>GT3: 0.0<br>GT4: 16.4  | IDU: .<br>BT: .<br>SP: .       | .                        | 7.05    | 2.06    | F0: 8.30<br>F1: 46.62<br>F2: 27.05<br>F3: 9.63<br>F4: 8.40    | .               |
| 20a      | Lawson 2010            | 36.0      | 47.00          | 14.00     | 35.63                    | 100.00       | .                           | GT1: 29.9<br>GT2: 8.1<br>GT3: 26.4<br>GT4: .    | IDU: 74.7<br>BT: 12.6<br>SP: . | 22.70                    | 0.00    | 0.00    | F0: 58.32<br>F1: 25.35<br>F2: 7.61<br>F3: 2.54<br>F4: 5.07    | .               |
| 20b      | Lawson 2010            | 36.0      | 71.00          | 14.00     | 40.44                    | 100.00       | .                           | GT1: 30.9<br>GT2: 6.1<br>GT3: 33.8<br>GT4: .    | IDU: 65.4<br>BT: 11.4<br>SP: . | 25.00                    | 0.00    | 3.16    | F0: 37.02<br>F1: 22.01<br>F2: 10.01<br>F3: 13.95<br>F4: 17.00 | .               |
| 21       | Marabita 2011          | 47.0      | 52.23          | 25.00     | 0.00                     | 100.00       | .                           | GT1: 52.2<br>GT2: 30.0<br>GT3: 13.8<br>GT4: 4.1 | IDU: 23.5<br>BT: 74.9<br>SP: . | 25.30                    | 0.00    | 0.00    | F0: 0.81<br>F1: 30.36<br>F2: 32.39<br>F3: 20.24<br>F4: 16.19  | .               |
| 22a      | Patin 2012-French coh. | 48.2      | 44.75          | 20.17     | 14.56                    | .            | .                           | GT1: 63.0<br>GT2: 8.8<br>GT3: 16.1<br>GT4: 2.1  | IDU: 33.6<br>BT: 43.9<br>SP: . | .                        | 0.00    | 0.00    | F0: 8.78<br>F1: 52.25<br>F2: 4.28<br>F3: 19.91<br>F4: 14.78   | .               |
| 22b      | Patin 2012-Swiss coh.  | 43.6      | 62.39          | 22.39     | 19.02                    | .            | .                           | GT1: 52.2<br>GT2: 9.7<br>GT3: 27.8<br>GT4: 6.8  | IDU: 41.8<br>BT: 19.2<br>SP: . | .                        | 0.00    | 0.00    | F0: 12.54<br>F1: 35.34<br>F2: 31.27<br>F3: 0.98<br>F4: 19.87  | .               |
| 22c      | Patin 2012-US/France   | 48.0      | 60.31          | 23.48     | 11.88                    | 100.00       | .                           | GT1: 67.2<br>GT2: 5.3<br>GT3: 16.9<br>GT4: 4.4  | IDU: 7.8<br>BT: 4.7<br>SP: .   | .                        | 0.00    | 0.00    | F0: 12.81<br>F1: 35.63<br>F2: 21.88<br>F3: 19.06<br>F4: 10.63 | .               |

Supplementary Table 8 continued

## Supplementary Materials

| Study ID | Study                    | Age (yrs) | Gender (%Male) | DOI (yrs) | **Excess alcohol use (%) | HCV RNA+ (%) | HCV RNA load (log 10 IU/ml) | Genotype (%)                                    | Mode of Infection (%)            | BMI (kg/m <sup>2</sup> ) | HIV (%) | HBV (%) | METAVIR (%)                                                   | Mean ALT (IU/L) |
|----------|--------------------------|-----------|----------------|-----------|--------------------------|--------------|-----------------------------|-------------------------------------------------|----------------------------------|--------------------------|---------|---------|---------------------------------------------------------------|-----------------|
| 22d      | Patin 2012-International | 45.8      | 40.65          | 16.96     | .                        | 100.00       | .                           | GT1: .<br>GT2: .<br>GT3: .<br>GT4: .            | IDU: 20.6<br>BT: 5.1<br>SP: .    | .                        | 0.00    | 0.00    | F0: 17.45<br>F1: 38.47<br>F2: 25.23<br>F3: 10.12<br>F4: 8.72  | .               |
| 22e      | Patin 2012-Australian    | 62.4      | 70.78          | 20.20     | .                        | 100.00       | .                           | GT1: 100<br>GT2: 0.0<br>GT3: 0.0<br>GT4: 0.0    | IDU: 0<br>BT: 0<br>SP: .         | .                        | 0.00    | 0.00    | F0: 5.94<br>F1: 29.68<br>F2: 33.33<br>F3: 14.61<br>F4: 16.44  | .               |
| 23       | Brescini 2014            | 45.0      | 62.37          | 6.25      | 15.05                    | .            | 5.76                        | GT1: 48.9<br>GT2: 12.4<br>GT3: 24.7<br>GT4: 4.3 | IDU: 47.9<br>BT: .<br>SP: .      | .                        | 0.00    | 0.00    | F0: 30.11<br>F1: 30.65<br>F2: 16.13<br>F3: 9.14<br>F4: 13.98  | 58.00           |
| 24       | de Ledinghen 2008        | 52.8      | 38.41          | 23.50     | 0.00                     | 100.00       | 5.83                        | GT1: 60.4<br>GT2: 20.1<br>GT3: 8.8<br>GT4: 9.5  | IDU: 16.0<br>BT: 33.8<br>SP: .   | .                        | 0.00    | 0.00    | F0: 34.60<br>F1: 34.45<br>F2: 13.41<br>F3: 7.16<br>F4: 10.37  | 59.00           |
| 25       | Nunnari 2010             | 52.5      | 57.14          | 12.40     | .                        | 100.00       | 2.80                        | GT1: 71.4<br>GT2: 14.3<br>GT3: 14.3<br>GT4: 0.0 | IDU: .<br>BT: .<br>SP: .         | .                        | 0.00    | 0.00    | F0: 14.29<br>F1: 14.29<br>F2: 28.57<br>F3: 28.57<br>F4: 14.29 | 97.40           |
| 26       | Mazzocato 2014           | 48.0      | 58.26          | 6.00      | 18.26                    | .            | .                           | GT1: 38.3<br>GT2: 18.3<br>GT3: 13.9<br>GT4: 2.6 | IDU: 32.2<br>BT: .<br>SP: .      | .                        | 0.00    | 0.00    | F0: 35.65<br>F1: 34.78<br>F2: 9.57<br>F3: 4.35<br>F4: 15.65   | 56.00           |
| 27       | Suarez-Zarracina 2012    | 46.5      | 61.76          | 23.00     | 64.71                    | 100.00       | 5.87                        | GT1: 82.4<br>GT2: 1.5<br>GT3: 11.8<br>GT4: 2.9  | IDU: 48.5<br>BT: 50.0<br>SP: 0.0 | .                        | 0.00    | 0.00    | F0: 16.18<br>F1: 16.18<br>F2: 22.06<br>F3: 25.00<br>F4: 20.59 | 85.50           |
| 28       | White 2012               | 57.0      | 100.00         | 34.00     | 34.09                    | 99.35        | 6.35                        | GT1: 85.7<br>GT2: 8.4<br>GT3: 4.5<br>GT4: 0.6   | IDU: 50.7<br>BT: 17.5<br>SP: .   | .                        | 0.00    | 0.00    | F0: 7.14<br>F1: 12.66<br>F2: 21.43<br>F3: 26.95<br>F4: 31.82  | .               |

Supplementary Table 8 continued

## Supplementary Materials

| Study ID | Study          | Age (yrs) | Gender (%Male) | DOI (yrs) | **Excess alcohol use (%) | HCV RNA+ (%) | HCV RNA load (log 10 IU/ml) | Genotype (%)                                    | Mode of Infection (%)             | BMI (kg/m <sup>2</sup> ) | HIV (%) | HBV (%) | METAVIR (%)                                                  | Mean ALT (IU/L) |
|----------|----------------|-----------|----------------|-----------|--------------------------|--------------|-----------------------------|-------------------------------------------------|-----------------------------------|--------------------------|---------|---------|--------------------------------------------------------------|-----------------|
| 29       | Reggiardo 2012 | 52.5      | 37.50          | 21.50     | 32.50                    | 100          | .                           | GT1: 50.0<br>GT2: 37.5<br>GT3: 12.5<br>GT4: 0.0 | IDU: 0.0<br>BT: 100<br>SP: 0.0    | .                        | 0.00    | 0.00    | F0: 20.00<br>F1: 42.50<br>F2: 15.00<br>F3: 20.00<br>F4: 2.50 | .               |
| 30       | Liu 2014       | 33.6      | 43.75          | 10.22     | .                        | .            | 6.22                        | GT1: 69.8<br>GT2: .<br>GT3: .<br>GT4: .         | IDU: 0.0<br>BT: 100<br>SP: 0.0    | .                        | .       | 1.04    | F0: 33.65<br>F1: 42.31<br>F2: 13.46<br>F3: 5.77<br>F4: 3.85  | 116.00          |
| 31a      | Terrault 2008  | 46.6      | 64.33          | 25.50     | 0.00                     | 100.00       | .                           | GT1: 100<br>GT2: 0.0<br>GT3: 0.0<br>GT4: 0.0    | IDU: 61.8<br>BT: 26.8<br>SP: 0.0  | .                        | 0.00    | 0.00    | F0: 8.00<br>F1: 26.00<br>F2: 25.50<br>F3: 31.00<br>F4: 9.00  | 110.40          |
| 31b      | Terrault 2008  | 47.9      | 66.43          | 24.00     | 0.00                     | 100.00       | .                           | GT1: 100<br>GT2: 0.0<br>GT3: 0.0<br>GT4: 0.0    | IDU: 57.3<br>BT: 23.1<br>SP: 0.0  | .                        | 0.00    | 0.00    | F0: 9.00<br>F1: 29.50<br>F2: 29.50<br>F3: 28.00<br>F4: 4.00  | 66.00           |
| 32       | Guyader 2007   | 41.6      | 58.00          | 16.00     | 36.00                    | 100.00       | .                           | GT1: 39.5<br>GT2: 6.8<br>GT3: 15.0<br>GT4: .    | IDU: 33.0<br>BT: 34.0<br>SP: 33.0 | 23.00                    | 0.00    | 0.00    | F0: 30.00<br>F1: 33.00<br>F2: 17.00<br>F3: 8.00<br>F4: 11.00 | .               |
| 33       | Pradat 2007    | 39.5      | 63.97          | 14.50     | 15.38                    | 100.00       | .                           | GT1: 35.6<br>GT2: .<br>GT3: .<br>GT4: .         | IDU: .<br>BT: .<br>SP: .          | .                        | .       | .       | F0: 3.24<br>F1: 37.25<br>F2: 25.10<br>F3: 25.51<br>F4: 8.91  | .               |
| 34a      | Castera 2004   | 34.4      | 83.78          | 12.10     | .                        | 100.00       | 9.30                        | GT1: 0.0<br>GT2: 0.0<br>GT3: 100<br>GT4: 0.0    | IDU: 65.0<br>BT: 16.0<br>SP: 19.0 | 18.10                    | 0.00    | 0.00    | F0: 24.50<br>F1: 24.50<br>F2: 30.0<br>F3: 10.50<br>F4: 10.50 | 118.00          |
| 34b      | Castera 2004   | 45.7      | 70.18          | 15.60     | .                        | 100.00       | 6.10                        | GT1: 78.9<br>GT2: 15.0<br>GT3: 0.0<br>GT4: 3.1  | IDU: 14.0<br>BT: 41.0<br>SP: 45.0 | 32.90                    | 0.00    | 0.00    | F0: 28.50<br>F1: 28.50<br>F2: 26.0<br>F3: 8.50<br>F4: 8.50   | 143.00          |

Supplementary Table 8 continued

## Supplementary Materials

| Study ID | Study             | Age (yrs) | Gender (%Male) | DOI (yrs) | **Excess alcohol use (%) | HCV RNA+ (%) | HCV RNA load (log 10 IU/ml) | Genotype (%)                                     | Mode of Infection (%)             | BMI (kg/m <sup>2</sup> ) | HIV (%) | HBV (%) | META VIR (%)                                                  | Mean ALT (IU/L) |
|----------|-------------------|-----------|----------------|-----------|--------------------------|--------------|-----------------------------|--------------------------------------------------|-----------------------------------|--------------------------|---------|---------|---------------------------------------------------------------|-----------------|
| 35a      | Mathurin 1998     | 43.0      | 40.20          | 14.90     | 10.78                    | 65.00        | .                           | GT1: 43.1<br>GT2: 7.8<br>GT3: 4.9<br>GT4: 1.0    | IDU: 32.0<br>BT: 35.0<br>SP: .    | .                        | 0.00    | 0.00    | F0: 29.85<br>F1: 52.24<br>F2: 10.45<br>F3: 2.99<br>F4: 4.48   | 24.50           |
| 35b      | Mathurin 1998     | 44.0      | 40.20          | 14.10     | 10.78                    | 80.00        | .                           | GT1: 45.1<br>GT2: 4.9<br>GT3: 11.8<br>GT4: 3.9   | IDU: 31.0<br>BT: 40.0<br>SP: .    | .                        | 0.00    | 0.00    | F0: 5.94<br>F1: 37.62<br>F2: 35.64<br>F3: 9.00<br>F4: 10.89   | 140.00          |
| 36       | Bruden, 2017      | 41.2      | 4864           | 18.60     | 8.85                     | 100.00       | .                           | GT1:68.80<br>GT2:14.74<br>GT3:13.27<br>GT4: 0.41 | IDU: 58.7<br>BT: 14.0<br>SP: 27.3 | .                        | 0.00    | 0.00    | F0: 18.43<br>F1: 18.42<br>F2: 32.19<br>F3: 21.62<br>F4: 9.34  | .               |
| 37       | Cepeda, 2016      | 41.6      | 100.00         | 16.90     | 67.97                    | 100.00       | .                           | GT1: .<br>GT2: .<br>GT3: .<br>GT4: .             | IDU: 100<br>BT: 0.0<br>SP: 0.0    | 19.80                    | 30.25   | 4.62    | F0: 22.42<br>F1: 22.78<br>F2: 14.23<br>F3: 14.23<br>F4: 26.33 | 49.00           |
| 38       | Cepeda, 2017      | 49.0      | 71.58          | 27.50     | 26.21                    | 100.00       | 6.40                        | GT1: .<br>GT2: .<br>GT3: .<br>GT4: .             | IDU: 100<br>BT: 0.0<br>SP: 0.0    | .                        | 34.96   | .       | F0: 31.33<br>F1: 31.33<br>F2: 11.31<br>F3: 11.31<br>F4: 14.73 | .               |
| 39       | Sakellariou, 2014 | 45.7      | 60.66          | 4.20      | 0.00                     | 100.00       | 5.06                        | GT1: 27.9<br>GT2: 1.6<br>GT3: 23.0<br>GT4: 14.8  | IDU: .<br>BT: .<br>SP: .          | .                        | 0.00    | 0.00    | F0: 25.86<br>F1: 60.34<br>F2: 5.17<br>F3: 5.17<br>F4: 3.45    | .               |
| 40a      | Lemos, 2007 A     | 57.0      | 64.10          | 22.00     | 0.00                     | 100.00       | .                           | GT1: .<br>GT2: .<br>GT3: .<br>GT4: .             | IDU: 0.0<br>BT: 69.2<br>SP: 0.0   | .                        | 0.00    | 0.00    | F0: 12.82<br>F1: 14.10<br>F2: 24.36<br>F3: 23.08<br>F4: 23.10 | .               |
| 40b      | Lemos, 2007 B     | 45.0      | 62.39          | 6.00      | 0.00                     | 100.00       | .                           | GT1: .<br>GT2: .<br>GT3: .<br>GT4: .             | IDU: 0.0<br>BT: 25.6<br>SP: 0.0   | .                        | 0.00    | 0.00    | F0: 41.88<br>F1: 41.88<br>F2: 6.84<br>F3: 6.84<br>F4: 2.6     | .               |

Supplementary Table 8 continued

## Supplementary Materials

| Study ID | Study              | Age (yrs) | Gender (%Male) | DOI (yrs) | **Excess alcohol use (%) | HCV RNA+ (%) | HCV RNA load (log 10 IU/ml) | Genotype (%)                                    | Mode of Infection (%)             | BMI (kg/m <sup>2</sup> ) | HIV (%) | HBV (%) | METAVIR (%)                                                   | Mean ALT (IU/L) |
|----------|--------------------|-----------|----------------|-----------|--------------------------|--------------|-----------------------------|-------------------------------------------------|-----------------------------------|--------------------------|---------|---------|---------------------------------------------------------------|-----------------|
| 41       | Delladetsima, 2013 | 42.7      | 60.87          | 4.40      | .                        | 87.00        | 3.50                        | GT1: 47.8<br>GT2: 0.0<br>GT3: 26.1<br>GT4: 13.0 | IDU: .<br>BT: .<br>SP: .          | .                        | .       | .       | F0: 47.83<br>F1: 60.87<br>F2: 8.70<br>F3: 4.35<br>F4: 4.35    | .               |
| 42       | Besheer, 2017      | 49.5      | 63.11          | 19.00     | .                        | 100.00       | 5.79                        | GT1: .<br>GT2: .<br>GT3: .<br>GT4: .            | IDU: .<br>BT: .<br>SP: .          | .                        | .       | .       | F0: 5.73<br>F1: 18.85<br>F2: 19.67<br>F3: 25.41<br>F4: 30.33  | 55.50           |
| 43       | Midgard, 2017      | 41.0      | 82.80          | 21.00     | 16.13                    | 100.00       | .                           | GT1: .<br>GT2: .<br>GT3: .<br>GT4: .            | IDU: 100<br>BT: 0.0<br>SP: 0.0    | .                        | 0.00    | 0.00    | F0: 33.33<br>F1: 34.41<br>F2: 10.75<br>F3: 10.75<br>F4: 10.75 | .               |
| 44       | Chen, 2017         | 37.0      | 69.47          | 17.00     | .                        | 100.00       | 6.10                        | GT1: .<br>GT2: .<br>GT3: .<br>GT4: .            | IDU:31.3<br>BT: 16.8<br>SP: 18.3  | 25.20                    | 0.00    | 0.00    | F0: 31.30<br>F1: 32.82<br>F2: 15.27<br>F3: 7.63<br>F4: 12.98  | 94.00           |
| 45       | Valva, 2014        | 51.0      | 65.63          | 20.00     | .                        | 100.00       | 5.74                        | GT1: .<br>GT2: .<br>GT3: .<br>GT4: .            | IDU: 21.9<br>BT: 12.5<br>SP: 62.5 | .                        | 0.00    | 0.00    | F0: 15.63<br>F1: 15.63<br>F2: 31.25<br>F3: 31.25<br>F4: 6.25  | 67.00           |

Supplementary Table 8 continued

Supplementary Table 4. Table summarizing patient characteristics for all 45 studies identified by the updated systematic review. Note: Of these, only studies with subjects that were HCV RNA positive were included in the meta-analysis. *Abbreviations: HCV: Hepatitis C virus; DOI: duration of infection; ALT: alanine aminotransferase; BMI: body mass index; HIV: human immunodeficiency virus; HBV: hepatitis B virus; GT: genotype BT: blood transfusion; IDU: intravenous drug use; SP: sporadic risk.*

**S5 Table: Summary of subgroups excluded from the meta-analysis**

|                                        | All Groups |        | Original Groups |        | New Groups |        |
|----------------------------------------|------------|--------|-----------------|--------|------------|--------|
|                                        | N          | SS     | N               | SS     | N          | SS     |
| <b>All groups</b>                      | 40         | 15,117 | 30              | 7,629  | 10         | 7,488  |
| <b>Study Setting</b>                   |            |        |                 |        |            |        |
| Clinical                               | 35         | 9,772  | 27              | 6,426  | 8          | 3,346  |
| Non-Clinical                           | 5          | 5,345  | 3               | 1,203  | 2          | 4,142  |
| <b>Study Design</b>                    |            |        |                 |        |            |        |
| Cross-sectional/Retrospective          | 32         | 10,258 | 28              | 7,447  | 4          | 2,811  |
| Retrospective-Prospective              | 8          | 4,859  | 2               | 182    | 6          | 4,677  |
| <b>Study population</b>                |            |        |                 |        |            |        |
| Females                                | .          | .      | .               | .      | .          | .      |
| Blood donors                           | 1          | 348    | .               | .      | 1          | 348    |
| Post-transfusion                       | 2          | 161    | 1               | 65     | 1          | 96     |
| Liver Clinic                           | 23         | 9,659  | 18              | 6,496  | 5          | 3,163  |
| Injection drug users                   | 2          | 432    | 2               | 432    | .          | .      |
| Community                              | 2          | 3,866  | 1               | 72     | 1          | 3,794  |
| Pediatric patients                     | 4          | 374    | 4               | 374    | .          | .      |
| Renal transplant recipients            | 2          | 68     | 1               | 45     | 1          | 23     |
| Dialysis patients                      | 4          | 209    | 3               | 145    | 1          | 64     |
| Infectious diseases                    | .          | .      | .               | .      | .          | .      |
| <b>Publication year</b>                |            |        |                 |        |            |        |
| <2000                                  | 8          | 2,749  | 6               | 2,545  | 2          | 204    |
| 2000 to <2005                          | 19         | 4,037  | 19              | 4,037  | .          | .      |
| 2005 to <2010                          | 9          | 7,556  | 5               | 1,047  | 4          | 6,509  |
| ≥2010                                  | 4          | 775    | 0               | .      | 4          | 775    |
| <b>Age at assessment</b>               |            |        |                 |        |            |        |
| Age <40                                | 32         | 6,435  | 22              | 3,096  | 10         | 3,339  |
| Age ≥ 40                               | 136        | 51,119 | 89              | 30,025 | 47         | 21,094 |
| <b>Age at infection</b>                |            |        |                 |        |            |        |
| <20 years                              | 16         | 2,757  | 9               | 1,101  | 7          | 1,656  |
| 30 to <40 years                        | 113        | 41,987 | 77              | 24,254 | 36         | 17,733 |
| 20 to <30 years                        | 33         | 12,225 | 25              | 7,766  | 8          | 4,459  |
| ≥40 years                              | 6          | 585    | 0               | .      | 6          | 585    |
| <b>Estimated duration of infection</b> |            |        |                 |        |            |        |
| <10 years                              | 14         | 1,244  | 7               | 599    | 7          | 645    |
| 10 to <20 years                        | 94         | 31,836 | 69              | 19,660 | 25         | 12,176 |
| ≥ 20 years                             | 60         | 24,474 | 35              | 12,862 | 25         | 11,612 |
| <b>Viral Genotype</b>                  |            |        |                 |        |            |        |
| Genotype 1                             | 10         | 3,000  | 5               | 1,854  | 5          | 1,146  |
| Genotype 2                             | 1          | 90     | 0               | .      | 1          | 90     |
| Genotype 3                             | 3          | 1,426  | 0               | .      | 3          | 1,426  |
| Genotype 4                             | 1          | 117    | 0               | .      | 1          | 117    |

Supplemental Table 5. Summary of subgroups excluded from the meta-analysis. 40 study groups (30 from the original review and 10 update) were excluded from the meta-analysis due to incomplete or missing assessment of RNA status for all study subjects. *Abbreviations: N: number of groups included in the meta-analysis; SS: total sample size in each group.; CHC: chronic hepatitis C.*

## Supplementary Materials

**S6 Table: Summary of clinical characteristics of study subjects stratified by review update**

|                                               | Updated Review<br>(1990-2018) |      |      | Original Review<br>(1990-2007) |      |      | New Groups<br>(2007-2018) |      |      |
|-----------------------------------------------|-------------------------------|------|------|--------------------------------|------|------|---------------------------|------|------|
|                                               | N                             | Mean | SE   | N                              | Mean | SE   | N                         | Mean | SE   |
| <b>Sample size</b>                            | 131                           | 326  | 35.9 | 81                             | 315  | 43.4 | 50                        | 344  | 63.1 |
| <b>Male (%)</b>                               | 131                           | 62.0 | 1.5  | 81                             | 62.1 | 2.0  | 50                        | 61.9 | 2.1  |
| <b>Age at assessment (yrs.)</b>               | 131                           | 44.3 | 0.6  | 81                             | 44.3 | 0.5  | 50                        | 44.4 | 1.3  |
| <b>Estimated age at infection (yrs.)</b>      | 131                           | 25.8 | 0.5  | 81                             | 25.8 | 0.4  | 50                        | 25.8 | 1.3  |
| <b>Estimated duration of infection (yrs.)</b> | 131                           | 18.4 | 0.5  | 81                             | 18.5 | 0.5  | 50                        | 18.2 | 1.0  |
| <b>Cirrhosis (%)</b>                          | 131                           | 12.0 | 0.7  | 81                             | 11.3 | 0.8  | 50                        | 13.2 | 1.2  |
| <b>Steatosis (%)</b>                          | 39                            | 50.3 | 3.9  | 21                             | 48.9 | 4.4  | 18                        | 52   | 6.8  |
| <b>BMI (kg/m<sup>2</sup>)</b>                 | 49                            | 25.7 | 0.4  | 30                             | 26.1 | 0.4  | 19                        | 25   | 0.9  |
| <b>HIV (%)</b>                                | 106                           | 2.0  | 0.7  | 63                             | 1.5  | 0.8  | 43                        | 2.8  | 1.1  |
| <b>HBV (HBsAg positive, %)</b>                | 104                           | 0.4  | 0.1  | 64                             | 0.3  | 0.1  | 40                        | 0.6  | 0.3  |
| <b>Elevated ALT (%)</b>                       | 52                            | 76.2 | 4.0  | 37                             | 80.8 | 4.0  | 15                        | 65   | 9.2  |
| <b>ALT (IU/L)</b>                             | 58                            | 87.5 | 4.3  | 35                             | 94.3 | 5.9  | 23                        | 77.3 | 5.7  |
| <b>Excess alcohol use (%)</b>                 | 102                           | 19.9 | 2.1  | 67                             | 18.1 | 2.5  | 35                        | 23.2 | 3.7  |
| <b>Mode of infection</b>                      |                               |      |      |                                |      |      |                           |      |      |
| IDU (%)                                       | 110                           | 43.4 | 2.5  | 68                             | 43   | 2.8  | 42                        | 44.1 | 5.0  |
| BT (%)                                        | 107                           | 25.7 | 2.0  | 68                             | 27.1 | 2.1  | 39                        | 23.4 | 4.0  |
| Sporadic (%)                                  | 90                            | 22.4 | 2.0  | 68                             | 25.4 | 2.3  | 22                        | 13.2 | 3.8  |
| <b>HCV RNA load (log<sub>10</sub>IU/mL)</b>   | 49                            | 5.8  | 0.2  | 27                             | 6.1  | 0.2  | 22                        | 5.5  | 0.3  |
| <b>Genotype</b>                               |                               |      |      |                                |      |      |                           |      |      |
| Genotype 1 (%)                                | 113                           | 56.2 | 2.4  | 71                             | 57.2 | 2.4  | 42                        | 54.5 | 4.9  |
| Genotype 2 (%)                                | 89                            | 9.5  | 1.3  | 49                             | 8.7  | 0.9  | 40                        | 10.4 | 2.6  |
| Genotype 3 (%)                                | 95                            | 17.6 | 2.0  | 54                             | 15   | 1.3  | 41                        | 21.1 | 4.3  |
| Genotype 4 (%)                                | 70                            | 4.6  | 1.5  | 34                             | 3.4  | 0.7  | 36                        | 5.7  | 2.8  |
| <b>Racial groups</b>                          |                               |      |      |                                |      |      |                           |      |      |
| White (%)                                     | 68                            | 68.6 | 4.3  | 34                             | 67.2 | 5.2  | 34                        | 70   | 6.9  |
| Black (%)                                     | 54                            | 13.4 | 3.4  | 30                             | 15.7 | 4.4  | 24                        | 10.5 | 5.5  |
| Asian (%)                                     | 47                            | 5.4  | 3.0  | 24                             | 5.7  | 4.1  | 23                        | 5.1  | 4.3  |

Supplementary Table 6. Summary of clinical characteristics of study subjects included in the meta-analysis stratified by review update. Meta-analysis was restricted to study groups where all subjects were confirmed by HCV RNA testing (N=131). *Abbreviations: BMI: body mass index; ALT: alanine aminotransferase; IDU: injection drug use; BT: blood transfusion; HCV: hepatitis C virus; HIV: human immunodeficiency virus; HBV: hepatitis B virus; HBsAg: hepatitis B surface antigen; RNA: ribonucleic acid; N: number of groups in meta-analysis reporting parameter; SE: standard error.*

## Supplementary Materials

S7 Table: Hepatic fibrosis progression rates stratified by review update

|                                  | Updated Review<br>(1990-2018) |       |        |       |                | Original Review<br>(1990-2007) |       |        |       |                |
|----------------------------------|-------------------------------|-------|--------|-------|----------------|--------------------------------|-------|--------|-------|----------------|
|                                  | N                             | Mean  | 95% CI |       | I <sup>2</sup> | N                              | Mean  | 95% CI |       | I <sup>2</sup> |
| <b>[1] All identified groups</b> |                               |       |        |       |                |                                |       |        |       |                |
| F0 → F1                          | 171                           | 0.112 | 0.103  | 0.122 | 98%            | 111                            | 0.117 | 0.104  | 0.130 | 98%            |
| F1 → F2                          | 171                           | 0.088 | 0.080  | 0.097 | 98%            | 111                            | 0.085 | 0.075  | 0.096 | 98%            |
| F2 → F3                          | 171                           | 0.123 | 0.113  | 0.133 | 94%            | 111                            | 0.120 | 0.109  | 0.133 | 91%            |
| F3 → F4                          | 171                           | 0.120 | 0.108  | 0.132 | 89%            | 111                            | 0.116 | 0.104  | 0.129 | 83%            |
| scFPR                            | 171                           | 0.099 | 0.093  | 0.104 | 85%            | 111                            | 0.103 | 0.098  | 0.108 | 85%            |
| <b>[2] HCV RNA+ groups</b>       |                               |       |        |       |                |                                |       |        |       |                |
| F0 → F1                          | 131                           | 0.107 | 0.097  | 0.118 | 98%            | 81                             | 0.108 | 0.095  | 0.123 | 98%            |
| F1 → F2                          | 131                           | 0.082 | 0.074  | 0.091 | 97%            | 81                             | 0.076 | 0.066  | 0.087 | 98%            |
| F2 → F3                          | 131                           | 0.117 | 0.107  | 0.129 | 94%            | 81                             | 0.111 | 0.099  | 0.124 | 89%            |
| F3 → F4                          | 131                           | 0.116 | 0.104  | 0.131 | 89%            | 81                             | 0.111 | 0.098  | 0.125 | 83%            |
| scFPR                            | 131                           | 0.094 | 0.088  | 0.100 | 85%            | 81                             | 0.091 | 0.084  | 0.098 | 83%            |

Supplementary Table 7. Annual stage-specific and stage-constant fibrosis progression rates based on random effect meta-analyses of [1] all identified study groups meeting inclusion/exclusion criteria (N=171); or [2] subset of identified groups where CHC was confirmed by HCV RNA testing in all subjects (N=131) stratified by review update. Hepatic fibrosis stages were based on METAVIR fibrosis scoring system. *Abbreviations: CHC: chronic hepatitis C; scFPR: stage-constant annual fibrosis progression rate (assuming constant progression over F0 to F4); I<sup>2</sup>: indicates the percentage of variability in estimates due to heterogeneity vs. sampling error; N: number of groups included in the meta-analyses.*



Supplementary Materials

S2 Figure: Forrest plot for fibrosis progression rate from F0 to F1

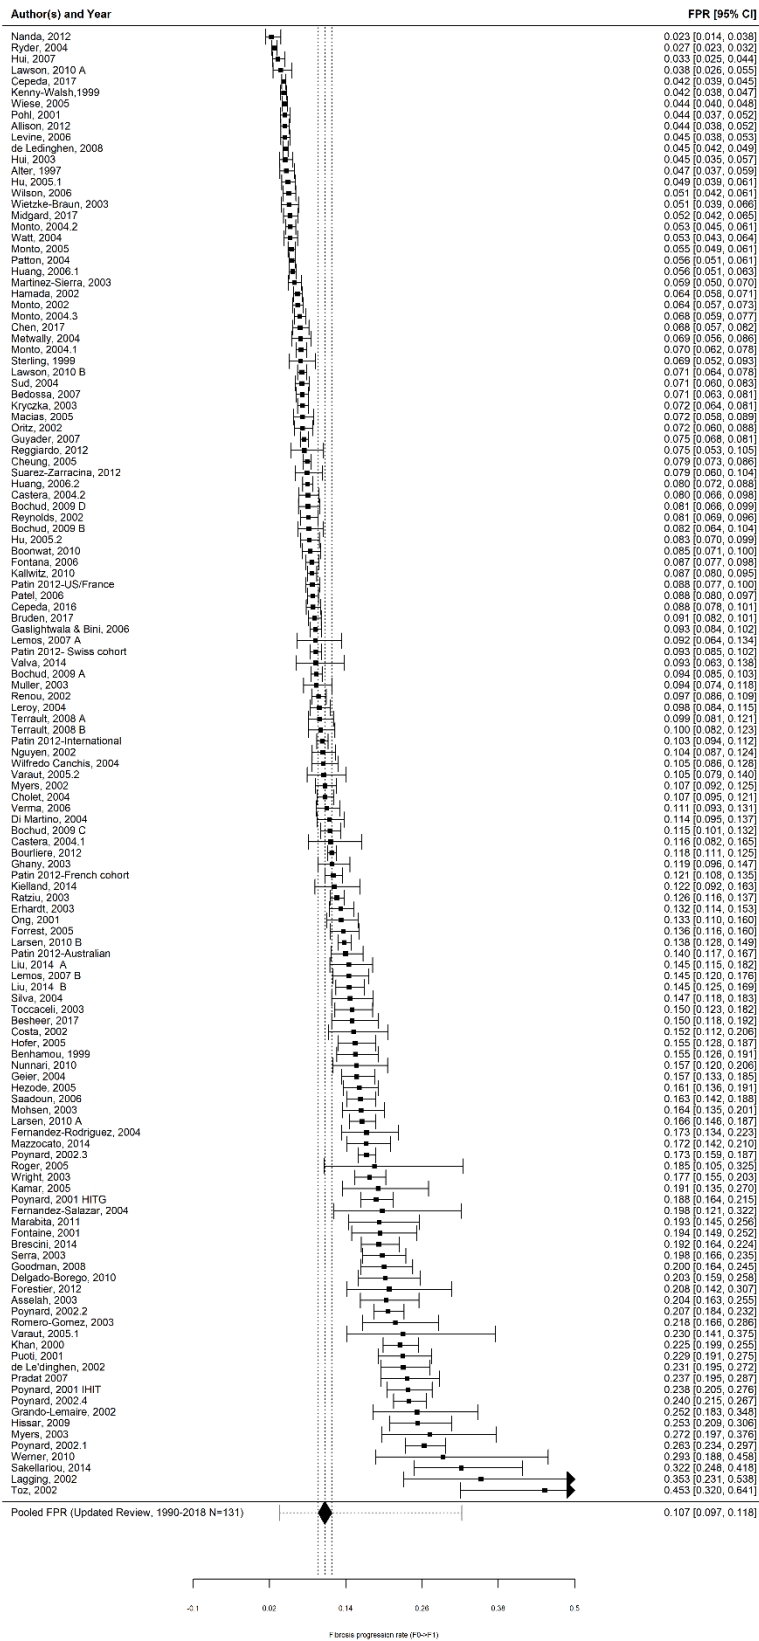

Supplementary Materials

S3 Figure: Forrest plot for fibrosis progression rate from F1 to F2

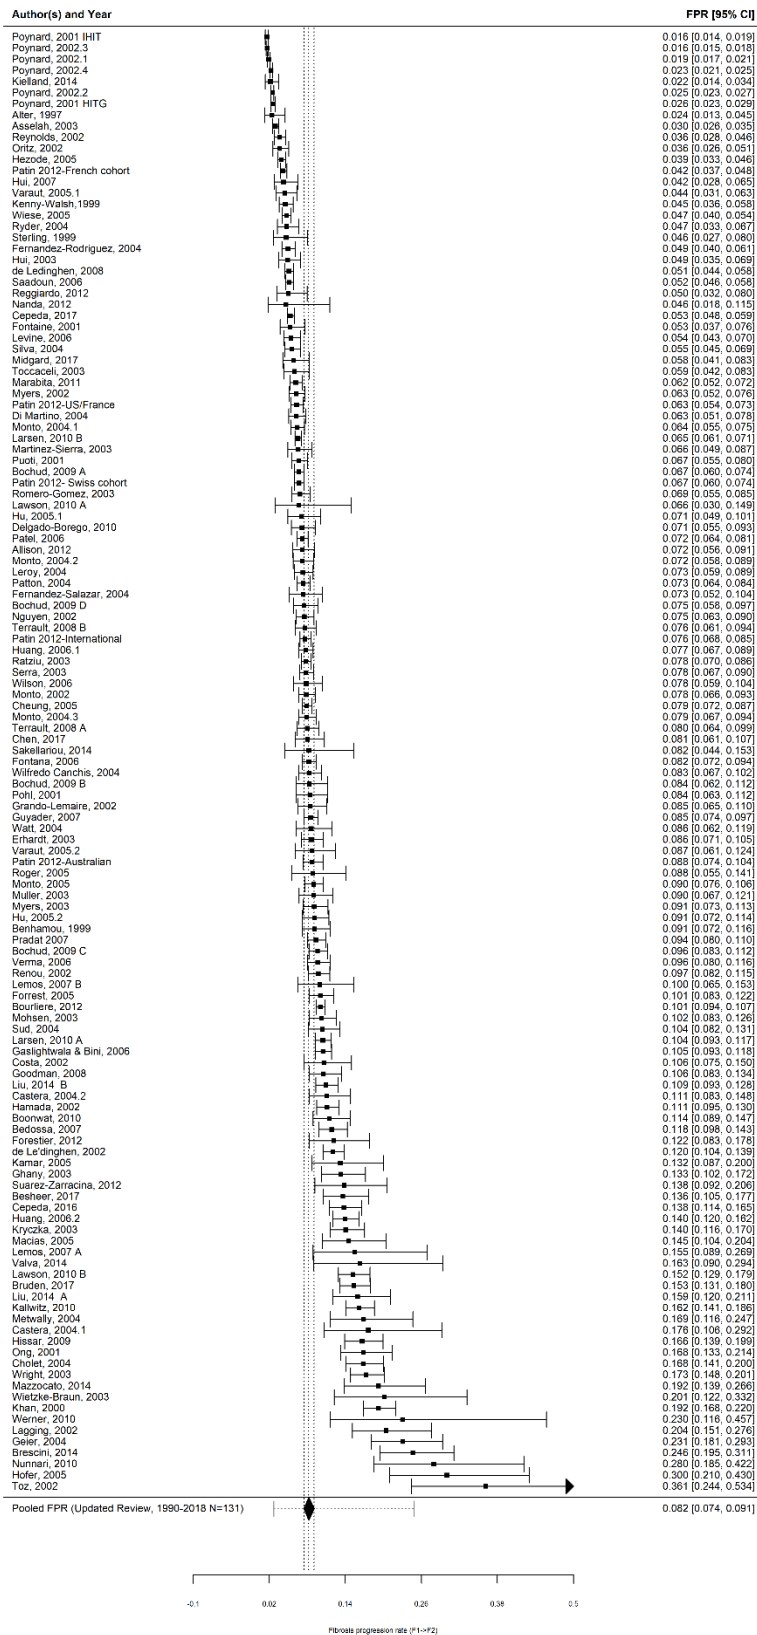

Supplementary Materials

S4 Figure: Forrest plot for fibrosis progression rate from F2 to F3

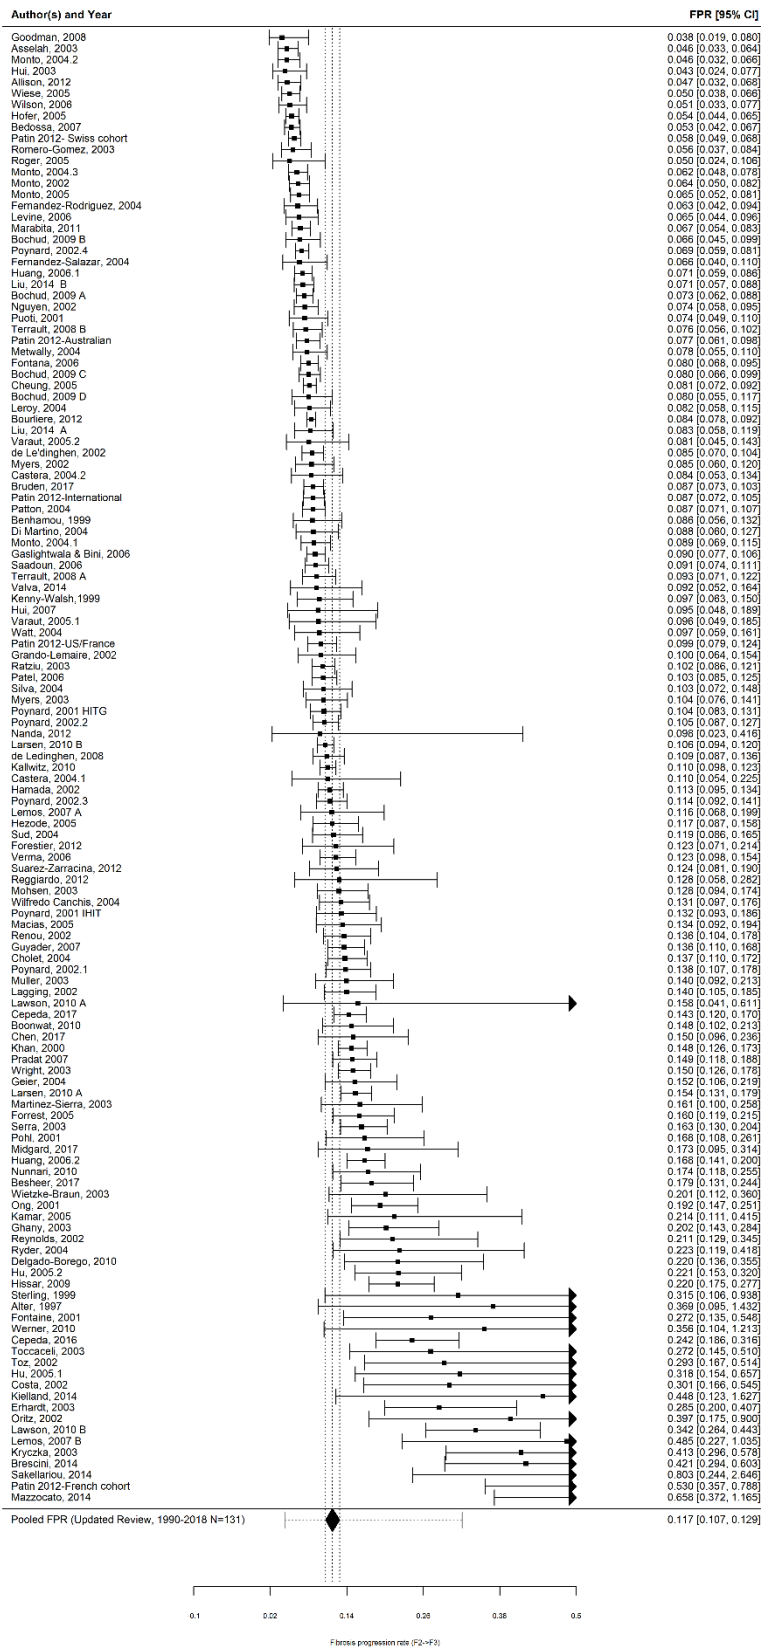

Supplementary Materials

S5 Figure: Forrest plot for fibrosis progression rate from F3 to F4

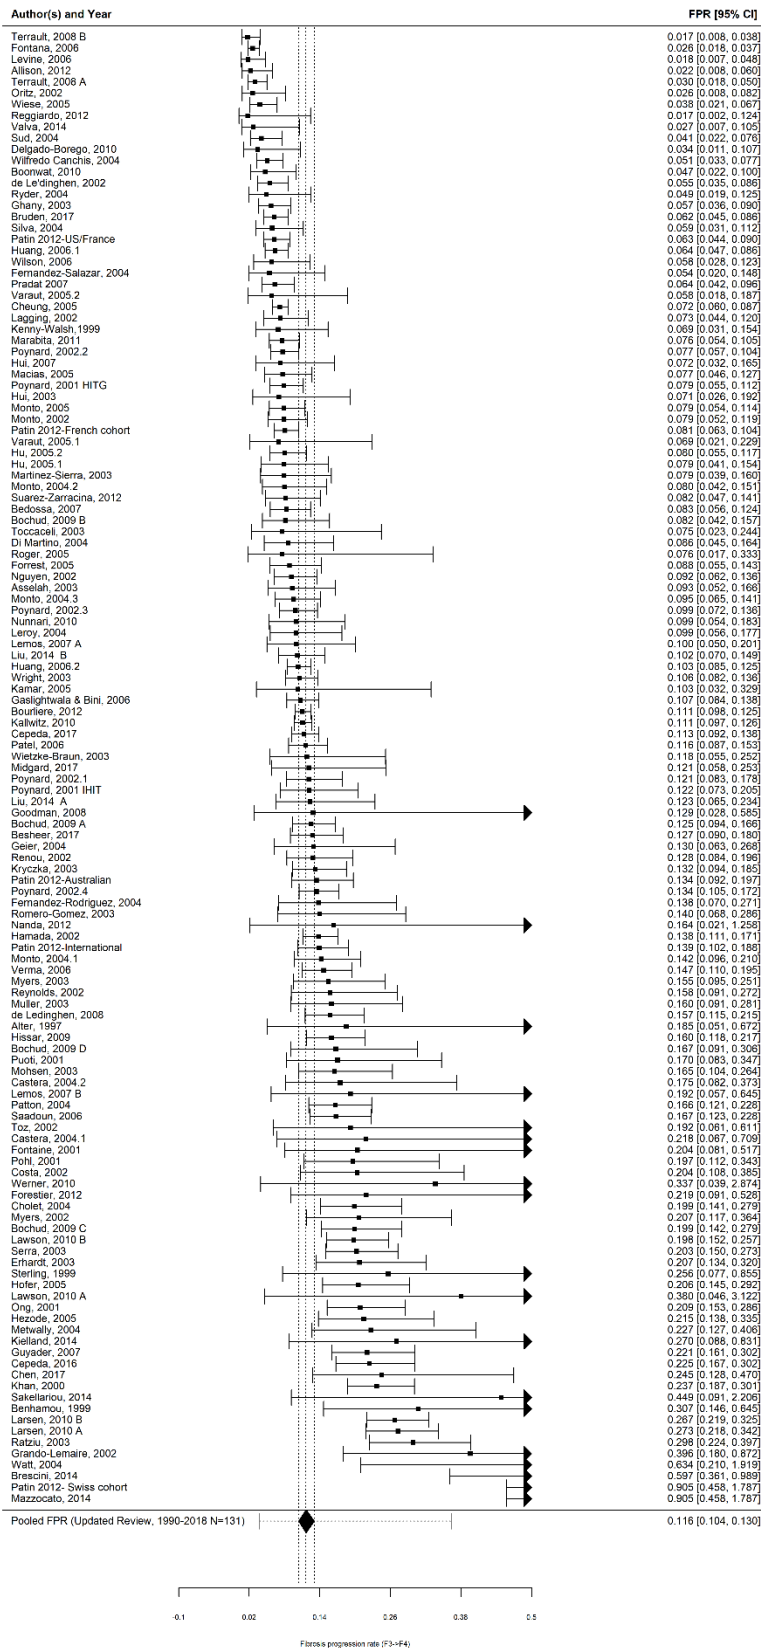

## Supplementary Materials

S8 Table: Covariate-adjusted hepatic fibrosis progression rates for CHC subgroups

|                               | F0 → F1 |        |       | F1 → F2 |        |       | F2 → F3 |        |       | F3 → F4 |        |       | scFPR |        |       | TTC*  |
|-------------------------------|---------|--------|-------|---------|--------|-------|---------|--------|-------|---------|--------|-------|-------|--------|-------|-------|
|                               | Mean    | 95% CI |       | Mean    | 95% CI |       | Mean    | 95% CI |       | Mean    | 95% CI |       | Mean  | 95% CI |       | (yrs) |
| <b>All groups</b>             | 0.107   | 0.099  | 0.115 | 0.082   | 0.075  | 0.090 | 0.119   | 0.110  | 0.129 | 0.116   | 0.105  | 0.129 | 0.096 | 0.092  | 0.100 | 38    |
| <b>Study design</b>           |         |        |       |         |        |       |         |        |       |         |        |       |       |        |       |       |
| Cross-sectional/Retrospective | 0.110   | 0.100  | 0.122 | 0.081   | 0.072  | 0.092 | 0.119   | 0.107  | 0.132 | 0.115   | 0.100  | 0.132 | 0.096 | 0.091  | 0.101 | 39    |
| Retrospective-Prospective     | 0.101   | 0.086  | 0.118 | 0.084   | 0.069  | 0.103 | 0.119   | 0.100  | 0.141 | 0.120   | 0.097  | 0.148 | 0.097 | 0.089  | 0.105 | 39    |
| <b>Study population**</b>     |         |        |       |         |        |       |         |        |       |         |        |       |       |        |       |       |
| Females                       | 0.063   | 0.039  | 0.103 | 0.073   | 0.040  | 0.136 | 0.115   | 0.067  | 0.199 | 0.071   | 0.035  | 0.144 | 0.076 | 0.058  | 0.100 | 52    |
| Blood donors                  | 0.102   | 0.059  | 0.176 | 0.060   | 0.030  | 0.120 | 0.088   | 0.047  | 0.166 | 0.059   | 0.025  | 0.138 | 0.081 | 0.058  | 0.114 | 55    |
| Pediatric patients            | 0.233   | 0.119  | 0.459 | 0.094   | 0.041  | 0.218 | 0.114   | 0.051  | 0.254 | 0.080   | 0.023  | 0.283 | 0.151 | 0.093  | 0.245 | 36    |
| Post transfusion              | 0.131   | 0.056  | 0.305 | 0.085   | 0.030  | 0.247 | 0.125   | 0.046  | 0.341 | 0.062   | 0.015  | 0.247 | 0.116 | 0.066  | 0.204 | 44    |
| Liver clinic                  | 0.106   | 0.096  | 0.117 | 0.083   | 0.073  | 0.095 | 0.116   | 0.104  | 0.129 | 0.119   | 0.104  | 0.136 | 0.096 | 0.091  | 0.100 | 38    |
| Injection drug users          | 0.125   | 0.079  | 0.197 | 0.053   | 0.030  | 0.094 | 0.116   | 0.069  | 0.193 | 0.206   | 0.111  | 0.380 | 0.095 | 0.076  | 0.120 | 40    |
| Community                     | 0.133   | 0.085  | 0.207 | 0.098   | 0.057  | 0.171 | 0.118   | 0.076  | 0.183 | 0.145   | 0.086  | 0.242 | 0.109 | 0.091  | 0.130 | 33    |
| Dialysis patients             | 0.094   | 0.061  | 0.144 | 0.048   | 0.028  | 0.083 | 0.156   | 0.090  | 0.271 | 0.108   | 0.056  | 0.209 | 0.076 | 0.056  | 0.103 | 47    |
| Renal transplant              | 0.105   | 0.063  | 0.174 | 0.108   | 0.057  | 0.203 | 0.124   | 0.067  | 0.228 | 0.082   | 0.034  | 0.202 | 0.112 | 0.076  | 0.164 | 39    |
| Infectious diseases           | 0.082   | 0.049  | 0.137 | 0.114   | 0.059  | 0.219 | 0.151   | 0.086  | 0.266 | 0.147   | 0.075  | 0.291 | 0.095 | 0.071  | 0.126 | 34    |
| <b>Publication year</b>       |         |        |       |         |        |       |         |        |       |         |        |       |       |        |       |       |
| <2000                         | 0.070   | 0.042  | 0.117 | 0.064   | 0.034  | 0.123 | 0.112   | 0.059  | 0.213 | 0.199   | 0.091  | 0.437 | 0.073 | 0.052  | 0.101 | 44    |
| 2000 to <2005                 | 0.106   | 0.092  | 0.121 | 0.073   | 0.061  | 0.086 | 0.112   | 0.097  | 0.129 | 0.115   | 0.096  | 0.137 | 0.091 | 0.085  | 0.097 | 41    |
| 2005 to <2010                 | 0.115   | 0.099  | 0.135 | 0.092   | 0.076  | 0.112 | 0.112   | 0.095  | 0.131 | 0.110   | 0.090  | 0.134 | 0.100 | 0.092  | 0.107 | 38    |
| ≥2010                         | 0.105   | 0.087  | 0.127 | 0.092   | 0.073  | 0.116 | 0.141   | 0.116  | 0.172 | 0.120   | 0.093  | 0.153 | 0.104 | 0.095  | 0.114 | 36    |
| <b>HCV genotype</b>           |         |        |       |         |        |       |         |        |       |         |        |       |       |        |       |       |
| Genotype-1                    | 0.127   | 0.104  | 0.155 | 0.069   | 0.054  | 0.089 | 0.098   | 0.080  | 0.121 | 0.098   | 0.076  | 0.126 | 0.093 | 0.084  | 0.102 | 43    |
| Genotype non-1                | 0.082   | 0.062  | 0.108 | 0.102   | 0.071  | 0.144 | 0.160   | 0.120  | 0.215 | 0.139   | 0.097  | 0.199 | 0.099 | 0.086  | 0.113 | 35    |
| Genotype-3                    | 0.099   | 0.064  | 0.153 | 0.105   | 0.061  | 0.183 | 0.128   | 0.081  | 0.204 | 0.164   | 0.094  | 0.286 | 0.106 | 0.086  | 0.130 | 34    |
| Genotype non-3                | 0.103   | 0.090  | 0.117 | 0.082   | 0.070  | 0.096 | 0.124   | 0.108  | 0.143 | 0.113   | 0.095  | 0.133 | 0.095 | 0.089  | 0.101 | 39    |
| <b>Race</b>                   |         |        |       |         |        |       |         |        |       |         |        |       |       |        |       |       |
| White                         | 0.117   | 0.099  | 0.138 | 0.076   | 0.062  | 0.093 | 0.107   | 0.090  | 0.127 | 0.120   | 0.097  | 0.149 | 0.094 | 0.087  | 0.103 | 39    |
| Black                         | 0.074   | 0.044  | 0.122 | 0.110   | 0.059  | 0.207 | 0.146   | 0.086  | 0.248 | 0.062   | 0.032  | 0.122 | 0.096 | 0.075  | 0.123 | 46    |
| Asian                         | 0.109   | 0.052  | 0.227 | 0.103   | 0.041  | 0.261 | 0.148   | 0.062  | 0.353 | 0.295   | 0.098  | 0.891 | 0.107 | 0.067  | 0.172 | 29    |

Supplementary Table 8. Annual fibrosis progression rates adjusted for study design, population, publication year, age at HCV infection (mean: 26), duration of infection (mean: 17.6), male gender (mean: 62%), infection by IDU (mean: 43%), infection by blood transfusion (mean: 26%), excess alcohol consumption (mean: 18%), HIV positivity (mean: 2%), genotype-1 (mean: 56%), genotype-3 (mean: 17%) and race (69% White; 13% Black and 5% Asian) except the following groups: † pediatric subgroup was adjusted for age at infection at 1.4 and duration of infection at 11 years; †† female subgroup was not adjusted by the mean gender (male gender: 0%); and \*post-transfusion cohort was adjusted for the mode of infection by IDU at 0% and blood transfusion at 100%; IDU cohort was adjusted for the mode of infection by IDU at 100% and blood transfusion at 0%. *Abbreviations: scFPR: stage-constant annual fibrosis progression rate (assuming constant progression over F0 to F4); \*TTC: time-to-cirrhosis (based on adjusted stage-specific annual progression rates); CHC: chronic hepatitis C; HCV: hepatitis C virus; IDU: Injection drug use.*

Supplementary Materials

S9 Table: Univariate random effects meta-regression of covariates associated with fibrosis progression

| Predictors                                    | F0→F1* |       |                  |             | F1→F2*  |       |                  |             | F2→F3* |       |                  |             | F3→F4* |       |                  |             | scFPR* |       |                  |             |   |   |   |      |
|-----------------------------------------------|--------|-------|------------------|-------------|---------|-------|------------------|-------------|--------|-------|------------------|-------------|--------|-------|------------------|-------------|--------|-------|------------------|-------------|---|---|---|------|
|                                               | β      | SE    | P-value          | RR          | β       | SE    | P-value          | RR          | β      | SE    | P-value          | RR          | β      | SE    | P-value          | RR          | β      | SE    | P-value          | RR          |   |   |   |      |
| <b>Study setting</b>                          |        |       |                  |             |         |       |                  |             |        |       |                  |             |        |       |                  |             |        |       |                  |             |   |   |   |      |
| Clinical (ref)                                | —      | —     | —                | 1.00        | —       | —     | —                | 1.00        | —      | —     | —                | 1.00        | —      | —     | —                | 1.00        | —      | —     | —                | 1.00        | — | — | — | 1.00 |
| Non-clinical                                  | -0.383 | 0.132 | <b>0.004</b>     | <b>0.68</b> | -0.287  | 0.137 | <b>0.039</b>     | <b>0.75</b> | -0.055 | 0.134 | 0.683            | 0.95        | -0.128 | 0.162 | 0.432            | 0.88        | -0.221 | 0.085 | <b>0.011</b>     | <b>0.80</b> |   |   |   |      |
| <b>Study design</b>                           |        |       |                  |             |         |       |                  |             |        |       |                  |             |        |       |                  |             |        |       |                  |             |   |   |   |      |
| Cross-sectional/Retrospective (ref)           | —      | —     | —                | 1.00        | —       | —     | —                | 1.00        | —      | —     | —                | 1.00        | —      | —     | —                | 1.00        | —      | —     | —                | 1.00        | — | — | — | 1.00 |
| Retrospective-Prospective                     | -0.206 | 0.105 | 0.051            | 0.81        | -0.004  | 0.109 | 0.970            | 1.00        | -0.057 | 0.104 | 0.585            | 0.94        | -0.078 | 0.125 | 0.531            | 0.92        | -0.102 | 0.066 | 0.128            | 0.90        |   |   |   |      |
| <b>Study population</b>                       |        |       |                  |             |         |       |                  |             |        |       |                  |             |        |       |                  |             |        |       |                  |             |   |   |   |      |
| Liver clinic (ref)                            | —      | —     | —                | 1.00        | —       | —     | —                | 1.00        | —      | —     | —                | 1.00        | —      | —     | —                | 1.00        | —      | —     | —                | 1.00        | — | — | — | 1.00 |
| Females                                       | -0.798 | 0.240 | <b>0.001</b>     | <b>0.45</b> | -0.467  | 0.252 | 0.067            | 0.63        | -0.408 | 0.245 | 0.098            | 0.67        | -0.779 | 0.313 | <b>0.014</b>     | <b>0.46</b> | -0.561 | 0.158 | <b>0.001</b>     | <b>0.57</b> |   |   |   |      |
| Blood donors                                  | -0.458 | 0.304 | 0.135            | 0.63        | -0.520  | 0.322 | 0.109            | 0.59        | -0.209 | 0.329 | 0.526            | 0.81        | -0.685 | 0.411 | 0.098            | 0.50        | -0.355 | 0.214 | 0.099            | 0.70        |   |   |   |      |
| Pediatric patients                            | 0.642  | 0.371 | 0.086            | 1.90        | 0.064   | 0.379 | 0.866            | 1.07        | -0.076 | 0.395 | 0.848            | 0.93        | -0.643 | 0.598 | 0.284            | 0.53        | 0.365  | 0.283 | 0.199            | 1.44        |   |   |   |      |
| Post-transfusion                              | -0.429 | 0.373 | 0.253            | 0.65        | -0.055  | 0.387 | 0.887            | 0.95        | 0.066  | 0.376 | 0.861            | 1.07        | -0.162 | 0.478 | 0.735            | 0.85        | -0.171 | 0.242 | 0.480            | 0.84        |   |   |   |      |
| Injecting drug users                          | 0.026  | 0.172 | 0.881            | 1.03        | -0.145  | 0.177 | 0.413            | 0.87        | 0.092  | 0.170 | 0.590            | 1.10        | 0.543  | 0.197 | <b>0.007</b>     | <b>1.72</b> | 0.020  | 0.103 | 0.849            | 1.02        |   |   |   |      |
| Community                                     | 0.235  | 0.262 | 0.372            | 1.26        | 0.073   | 0.266 | 0.785            | 1.08        | 0.011  | 0.242 | 0.963            | 1.01        | 0.170  | 0.274 | 0.537            | 1.18        | 0.122  | 0.142 | 0.390            | 1.13        |   |   |   |      |
| Dialysis patients                             | 0.132  | 0.224 | 0.557            | 1.14        | -0.088  | 0.239 | 0.714            | 0.92        | 0.774  | 0.257 | <b>0.003</b>     | <b>2.17</b> | 0.150  | 0.307 | 0.627            | 1.16        | 0.099  | 0.175 | 0.571            | 1.10        |   |   |   |      |
| Renal transplant recipients                   | 0.752  | 0.275 | <b>0.007</b>     | <b>2.12</b> | 0.751   | 0.289 | <b>0.010</b>     | <b>2.12</b> | 0.541  | 0.300 | 0.073            | 1.72        | 0.076  | 0.428 | 0.859            | 1.08        | 0.699  | 0.222 | <b>0.002</b>     | <b>2.01</b> |   |   |   |      |
| Infectious diseases                           | 0.301  | 0.266 | 0.259            | 1.35        | 0.934   | 0.278 | <b>0.001</b>     | <b>2.54</b> | 0.895  | 0.261 | <b>0.001</b>     | <b>2.45</b> | 0.814  | 0.302 | <b>0.008</b>     | <b>2.26</b> | 0.618  | 0.166 | <b>&lt;.001</b>  | <b>1.86</b> |   |   |   |      |
| <b>Publication year</b>                       |        |       |                  |             |         |       |                  |             |        |       |                  |             |        |       |                  |             |        |       |                  |             |   |   |   |      |
| <2000 (ref)                                   | —      | —     | —                | 1.00        | —       | —     | —                | 1.00        | —      | —     | —                | 1.00        | —      | —     | —                | 1.00        | —      | —     | —                | 1.00        | — | — | — | 1.00 |
| 2000 to <2005                                 | 0.562  | 0.290 | 0.055            | 1.75        | 0.453   | 0.305 | 0.139            | 1.57        | -0.180 | 0.33  | 0.582            | 0.84        | -0.357 | 0.385 | 0.355            | 0.70        | 0.328  | 0.213 | 0.126            | 1.39        |   |   |   |      |
| 2005 to <2010                                 | 0.352  | 0.295 | 0.234            | 1.42        | 0.568   | 0.309 | 0.069            | 1.76        | -0.327 | 0.330 | 0.323            | 0.72        | -0.630 | 0.389 | 0.108            | 0.53        | 0.238  | 0.216 | 0.272            | 1.27        |   |   |   |      |
| ≥2010                                         | 0.453  | 0.296 | 0.128            | 1.57        | 0.687   | 0.311 | <b>0.029</b>     | <b>1.99</b> | 0.015  | 0.332 | 0.965            | 1.01        | -0.227 | 0.392 | 0.563            | 0.80        | 0.398  | 0.217 | 0.069            | 1.49        |   |   |   |      |
| <b>Gender – male†</b>                         | 0.518  | 0.290 | 0.076            | 1.68        | 0.519   | 0.297 | 0.083            | 1.68        | 0.092  | 0.289 | 0.751            | 1.10        | 0.549  | 0.352 | 0.121            | 1.73        | 0.340  | 0.186 | 0.069            | 1.41        |   |   |   |      |
| <b>Age at assessment (yrs.)</b>               | -0.026 | 0.007 | <b>0.001</b>     | <b>0.97</b> | -0.0003 | 0.008 | 0.967            | 1.00        | -0.012 | 0.007 | 0.103            | 0.99        | -0.019 | 0.010 | <b>0.050</b>     | <b>0.98</b> | -0.017 | 0.005 | <b>0.001</b>     | <b>0.98</b> |   |   |   |      |
| <b>Estimated Age at infection (yrs.)</b>      | 0.023  | 0.008 | <b>0.005</b>     | <b>1.02</b> | 0.029   | 0.008 | <b>&lt;.001</b>  | <b>1.03</b> | 0.035  | 0.008 | <b>&lt;.0001</b> | <b>1.04</b> | 0.027  | 0.010 | <b>0.009</b>     | <b>1.03</b> | 0.026  | 0.005 | <b>&lt;.0001</b> | <b>1.03</b> |   |   |   |      |
| <b>Estimated Duration of infection (yrs.)</b> | -0.065 | 0.007 | <b>&lt;.0001</b> | <b>0.94</b> | -0.036  | 0.009 | <b>&lt;.0001</b> | <b>0.96</b> | -0.059 | 0.008 | <b>&lt;.0001</b> | <b>0.94</b> | -0.058 | 0.010 | <b>&lt;.0001</b> | <b>0.94</b> | -0.052 | 0.004 | <b>&lt;.0001</b> | <b>0.95</b> |   |   |   |      |
| <b>Injecting drug use†</b>                    | 0.022  | 0.204 | 0.913            | 1.02        | -0.092  | 0.207 | 0.657            | 0.91        | -0.180 | 0.199 | 0.369            | 0.84        | 0.500  | 0.236 | <b>0.036</b>     | <b>1.65</b> | -0.003 | 0.128 | 0.979            | 1.00        |   |   |   |      |
| <b>Blood transfusion†</b>                     | 0.417  | 0.273 | 0.129            | 1.52        | 0.284   | 0.279 | 0.311            | 1.33        | 0.551  | 0.263 | <b>0.038</b>     | 1.73        | 0.188  | 0.321 | 0.559            | 1.21        | 0.362  | 0.169 | <b>0.034</b>     | <b>1.44</b> |   |   |   |      |
| <b>Elevated ALT†</b>                          | 0.852  | 0.272 | <b>0.002</b>     | <b>2.34</b> | 0.074   | 0.297 | 0.805            | 1.08        | -0.058 | 0.305 | 0.851            | 0.94        | 0.332  | 0.369 | 0.370            | 1.39        | 0.476  | 0.199 | <b>0.018</b>     | <b>1.61</b> |   |   |   |      |
| <b>Excess alcohol use†</b>                    | -0.644 | 0.267 | <b>0.017</b>     | <b>0.53</b> | 0.432   | 0.273 | 0.117            | 1.54        | -0.035 | 0.261 | 0.893            | 0.97        | 0.275  | 0.305 | 0.368            | 1.32        | -0.066 | 0.165 | 0.687            | 0.94        |   |   |   |      |
| <b>HIV positive†</b>                          | -0.192 | 0.809 | 0.813            | 0.83        | 0.116   | 0.815 | 0.888            | 1.12        | -0.365 | 0.770 | 0.636            | 0.69        | 1.052  | 0.909 | 0.249            | 2.86        | -0.069 | 0.486 | 0.888            | 0.93        |   |   |   |      |
| <b>Genotype-1†</b>                            | -0.080 | 0.214 | 0.708            | 0.92        | -0.358  | 0.215 | 0.099            | 0.70        | -0.626 | 0.199 | <b>0.002</b>     | <b>0.53</b> | -0.935 | 0.236 | <b>&lt;.001</b>  | <b>0.39</b> | -0.317 | 0.129 | <b>0.015</b>     | <b>0.73</b> |   |   |   |      |
| <b>Genotype-3†</b>                            | 0.378  | 0.300 | 0.210            | 1.46        | 0.259   | 0.307 | 0.401            | 1.29        | 0.376  | 0.290 | 0.198            | 1.46        | 0.962  | 0.337 | <b>0.005</b>     | <b>2.62</b> | 0.367  | 0.184 | <b>0.048</b>     | <b>1.44</b> |   |   |   |      |
| <b>White†</b>                                 | 0.019  | 0.197 | 0.925            | 1.02        | 0.0004  | 0.201 | 0.998            | 1.00        | -0.188 | 0.192 | 0.330            | 0.83        | 0.147  | 0.230 | 0.523            | 1.16        | -0.013 | 0.124 | 0.918            | 0.99        |   |   |   |      |
| <b>Black†</b>                                 | -0.440 | 0.308 | 0.155            | 0.64        | -0.166  | 0.316 | 0.601            | 0.85        | -0.485 | 0.298 | 0.105            | 0.62        | -0.759 | 0.357 | <b>0.035</b>     | <b>0.47</b> | -0.374 | 0.189 | <b>0.050</b>     | <b>0.69</b> |   |   |   |      |
| <b>Asian†</b>                                 | -0.569 | 0.409 | 0.166            | 0.57        | -0.196  | 0.421 | 0.643            | 0.82        | -0.375 | 0.404 | 0.355            | 0.69        | 0.067  | 0.464 | 0.885            | 1.07        | -0.321 | 0.254 | 0.209            | 0.73        |   |   |   |      |

Supplementary Table 9. Linear mixed model-maximum likelihood method. \*Natural Log-transformed progression rates. Missing were imputed using mean values. †Proportion. Values in bold indicate statistical significance. Abbreviations: scFPR: stage-constant annual fibrosis progression rate (assuming constant progression over F0 to F4); β: coefficient; SE: standard error; HCV: hepatitis C virus; HIV: human immunodeficiency virus; RNA: ribonucleic acid; CHC: chronic hepatitis.



## Supplementary Materials

### Database search strategy and search strings

#### 1. MEDLINE

**Databases searched:** Ovid MEDLINE: Epub Ahead of Print, In-Process & Other Non-Indexed Citations, Ovid MEDLINE® Daily and Ovid MEDLINE® 1946-Present

**Search date:** Jan 02, 2018

**Limits:** 2007 -Current

**Filters:** BMJ Clinical Evidence - MEDLINE cohort and case-control filter [undated] [Ovid] from website <http://www.york.ac.uk/inst/crd/intertasc/observational.htm>

#### Search Strategy:

| #  | Searches                                                                                                                            |
|----|-------------------------------------------------------------------------------------------------------------------------------------|
| 1  | exp cohort studies/                                                                                                                 |
| 2  | cohort\$.tw.                                                                                                                        |
| 3  | controlled clinical trial.pt.                                                                                                       |
| 4  | epidemiologic methods/                                                                                                              |
| 5  | limit 4 to yr=1966-1989                                                                                                             |
| 6  | exp case-control studies/                                                                                                           |
| 7  | (case\$ and control\$).tw.                                                                                                          |
| 8  | or/1-3,5-7                                                                                                                          |
| 9  | exp hepatitis C/                                                                                                                    |
| 10 | Hepacivirus/                                                                                                                        |
| 11 | ((("parenterally transmitted " or parenterally-transmitted) adj3 ("non a non b hepatitis" or "hepatitis viral non-a non-b")).ti,ab. |
| 12 | ("hepatitis c" adj2 chronic).ti,ab.                                                                                                 |
| 13 | ((("hepatitis C" or "hepatitis c" or "hepatitis c-like" or "hepatitis c like") adj3 virus\$).ti,ab.                                 |
| 14 | (virus\$ or hepacivirus\$ or HCV or "hepatitis c" or "pt-nanbh").ti,ab.                                                             |
| 15 | or/9-14                                                                                                                             |
| 16 | exp disease progression/                                                                                                            |
| 17 | ((progression? or exacerbation) adj2 disease).ti,ab.                                                                                |
| 18 | fibrosis/                                                                                                                           |
| 19 | Liver Cirrhosis/                                                                                                                    |
| 20 | (fibros\$ or cirrhosis).ti,ab.                                                                                                      |
| 21 | ((fibros\$ or cirrhosis) adj2 (liver or hepatic)).ti,ab.                                                                            |
| 22 | or/16-21                                                                                                                            |
| 23 | Prognosis/                                                                                                                          |
| 24 | prognos\$.ti,ab.                                                                                                                    |
| 25 | disease-free survival/                                                                                                              |
| 26 | (survival? adj3 ("disease-free" or "disease freeor progression-free" or "progression free" or "event-free" or "event free")).ti,ab. |
| 27 | medical futility/                                                                                                                   |
| 28 | (futil\$ adj2 (treatment? or medical)).ti,ab.                                                                                       |
| 29 | treatment outcome/                                                                                                                  |
| 30 | (treatment adj2 (efficacy or effectiveness or outcome)).ti,ab.                                                                      |
| 31 | (outcome adj2 rehabilitation).ti,ab.                                                                                                |
| 32 | treatment failure/                                                                                                                  |
| 33 | (treatment adj2 failure?).ti,ab.                                                                                                    |
| 34 | morbidity/                                                                                                                          |
| 35 | morbidity\$.ti,ab.                                                                                                                  |
| 36 | mortality/                                                                                                                          |
| 37 | (mortality\$ or death rate?).ti,ab.                                                                                                 |
| 38 | (mortality\$ adj3 (decline? or determinant? or differential or excess)).ti,ab.                                                      |
| 39 | ("death rate?" adj3 ("age-specific" or "age specific")).ti,ab.                                                                      |
| 40 | ((death or "case fatality") adj2 rate?).ti,ab.                                                                                      |
| 41 | fatal outcome/                                                                                                                      |
| 42 | (outcome? adj2 fatal).ti,ab.                                                                                                        |
| 43 | hospital mortality/                                                                                                                 |
| 44 | (mortality\$ adj3 (hospital or "in-hospital" or inhospital or "in hospital" or "in-house" or "in house")).ti,ab.                    |

## Supplementary Materials

|    |                                                                  |
|----|------------------------------------------------------------------|
| 45 | survival rate/                                                   |
| 46 | (rate adj3 survival adj3 (mean or rate or cumulative)).ti,ab.    |
| 47 | (survivorship or (survival adj2 (rates or "times mean"))).ti,ab. |
| 48 | or/23-47                                                         |
| 49 | 8 and 15 and 22 and 48                                           |

### 2. EMBASE

**Databases searched:** Embase Classic+Embase 1947 to 2017 December 29

**Search date:** January 02, 2018

**Limits:** 2007-Current

**Filters:** [BMJ Clinical Evidence - EMBASE cohort and case-control filter](http://www.york.ac.uk/inst/crd/intertasc/observational.htm) [undated] [Ovid] from website <http://www.york.ac.uk/inst/crd/intertasc/observational.htm>

#### Search Strategy:

| #  | Searches                                                                                                                            |
|----|-------------------------------------------------------------------------------------------------------------------------------------|
| 1  | exp hepatitis C/                                                                                                                    |
| 2  | exp hepatitis C virus/                                                                                                              |
| 3  | ((("parenterally transmitted " or parenterally-transmitted) adj3 ("non a non b hepatitis" or "hepatitis viral non-a non-b")).ti,ab. |
| 4  | ("hepatitis c" adj2 chronic).ti,ab.                                                                                                 |
| 5  | ((("hepatitis C" or "hepatitis c" or "hepatitis c-like" or "hepatitis c like") adj3 virus\$).ti,ab.                                 |
| 6  | (hepacivirus\$ or HCV or "hepatitis c" or "pt-nanbh").ti,ab.                                                                        |
| 7  | or/1-6                                                                                                                              |
| 8  | exp disease course/                                                                                                                 |
| 9  | ((progression? or exacerbation) adj2 disease).ti,ab.                                                                                |
| 10 | liver fibrosis/                                                                                                                     |
| 11 | fibrosis.ti,ab.                                                                                                                     |
| 12 | liver cirrhosis/                                                                                                                    |
| 13 | (fibros\$ or cirrhosis).ti,ab.                                                                                                      |
| 14 | ((fibros\$ or cirrhosis) adj2 (liver or hepatic)).ti,ab.                                                                            |
| 15 | or/8-14                                                                                                                             |
| 16 | prognosis/                                                                                                                          |
| 17 | prognos\$.mp.                                                                                                                       |
| 18 | disease-free survival/                                                                                                              |
| 19 | (survival? adj3 ("disease-free" or "disease freeor progression-free" or "progression free" or "event-free" or "event free")).ti,ab. |
| 20 | (futil\$ adj2 (treatment? or medical)).ti,ab.                                                                                       |
| 21 | treatment outcome/                                                                                                                  |
| 22 | (treatment adj2 (efficacy or effectiveness or outcome)).ti,ab.                                                                      |
| 23 | (outcome adj2 rehabilitation).ti,ab.                                                                                                |
| 24 | treatment failure/                                                                                                                  |
| 25 | (treatment adj2 failure?).ti,ab.                                                                                                    |
| 26 | morbidity/                                                                                                                          |
| 27 | morbidity\$.ti,ab.                                                                                                                  |
| 28 | mortality/                                                                                                                          |
| 29 | (mortality\$ or death rate?).ti,ab.                                                                                                 |
| 30 | (mortality\$ adj3 (decline? or determinant? or differential or excess)).ti,ab.                                                      |
| 31 | (death rate? adj3 ("age-specific" or "age specific")).ti,ab.                                                                        |
| 32 | fatality/                                                                                                                           |
| 33 | (outcome? adj2 fatal).ti,ab.                                                                                                        |
| 34 | (mortality\$ adj3 (hospital or "in-hospital" or inhospital or "in hospital" or "in-house" or "in house")).ti,ab.                    |
| 35 | survival rate/                                                                                                                      |
| 36 | (rate adj3 survival adj3 (mean or rate or cumulative)).ti,ab.                                                                       |
| 37 | (survivorship or (survival adj2 (rates or "times mean"))).ti,ab.                                                                    |
| 38 | or/16-37                                                                                                                            |
| 39 | exp cohort analysis/                                                                                                                |
| 40 | exp longitudinal study/                                                                                                             |
| 41 | exp prospective study/                                                                                                              |



## Supplementary Materials

|    |                            |
|----|----------------------------|
| 42 | exp follow up/             |
| 43 | cohort\$.tw.               |
| 44 | exp case control study/    |
| 45 | (case\$ and control\$).tw. |
| 46 | or/39-45                   |
| 47 | 7 and 15 and 38 and 46     |

### PUBMED

#### Databases searched: PubMed

**Limits:** Publication date from 2007/01/01 to 2018/01/02

**Filters:** BMJ Clinical Evidence - EMBASE cohort and case-control filter [undated] [Ovid translated into PubMed] from website <http://www.york.ac.uk/inst/crd/intertasc/observational.htm>

#### Search Strategy:

((cohort studies[mesh]) OR (cohort\$[Title]) OR (epidemiologic methods[mesh:noexp]) OR (case-control studies[mesh]) OR ((case\$ AND control\$) AND Title) OR (limit AND (epidemiologic methods[mesh:noexp]) AND to yr=1966-1989)) AND ((hepatitis C[mesh]) OR (Hepacivirus[mesh:noexp]) OR (((("parenterally transmitted"[tiab] OR parenterally-transmitted[tiab]) AND ("non a non b hepatitis"[tiab] OR "hepatitis viral non-a non-b"[tiab]))) OR (("hepatitis c"[tiab] AND chronic[tiab])) OR (((("hepatitis C"[tiab] OR "hepatitis c"[tiab] OR "hepatitis c-like"[tiab] OR "hepatitis c like"[tiab]) AND virus\$[tiab])) OR ((virus\$[tiab] OR hepacivirus\$[tiab] OR HCV[tiab] OR "hepatitis c"[tiab] OR "pt-nanbh"[tiab]))) AND ((disease progression[mesh]) OR (((progression\*[tiab] OR exacerbation[tiab]) AND disease[tiab])) OR (fibrosis[mesh:noexp] OR (Liver Cirrhosis[mesh:noexp] OR ((fibros\$[tiab] OR cirrhosis[tiab])) OR (((fibros\$[tiab] OR cirrhosis[tiab]) AND (liver[tiab] OR hepatic[tiab])))) AND ((Prognosis[mesh:noexp]) OR (prognos\$[tiab]) OR (disease-free survival[mesh:noexp]) OR ((survival\*[tiab] AND ("disease-free"[tiab] OR "disease free"[tiab] OR "progression-free"[tiab] OR "progression free"[tiab] OR "event-free"[tiab] OR "event free"[tiab]))) OR (medical futility[mesh:noexp]) OR ((futil\$[tiab] AND (treatment\*[tiab] OR medical[tiab]))) OR (treatment outcome[mesh:noexp]) OR ((treatment[tiab] AND (efficacy[tiab] OR effectiveness[tiab] OR outcome[tiab]))) OR ((outcome[tiab] AND rehabilitation[tiab])) OR (treatment failure[mesh:noexp]) OR ((treatment[tiab] AND failure\*[tiab])) OR (morbidity[mesh:noexp]) OR (morbidity\$[tiab]) OR (mortality[mesh:noexp]) OR ((mortalit\$[tiab] OR death rate\*[tiab])) OR ((mortalit\$[tiab] AND (decline\*[tiab] OR determinant\*[tiab] OR differential[tiab] OR excess[tiab]))) OR (("death rate\*[tiab] AND ("age-specific"[tiab] OR "age specific"[tiab]))) OR (((death[tiab] OR "case fatality"[tiab]) AND rate\*[tiab])) OR (fatal outcome[mesh:noexp]) OR ((outcome\*[tiab] AND fatal[tiab])) OR (hospital mortality[mesh:noexp]) OR ((mortalit\$[tiab] AND (hospital[tiab] OR "in-hospital"[tiab] OR inhospital[tiab] OR "in hospital"[tiab] OR "in-house"[tiab] OR "in house"[tiab]))) OR (survival rate[mesh:noexp]) OR ((rate[tiab] AND survival[tiab] AND (mean[tiab] OR rate[tiab] OR cumulative[tiab]))) OR ((survivORship[tiab] OR (survival[tiab] AND (rates[tiab] OR "times mean"[tiab])))

## Supplementary Materials

### List of extracted data items

Previously identified data items were abstracted in duplicate by two independent reviewers using piloted abstraction sheets in excel. Study authors were not contacted to obtain missing data. For non-English studies, native speakers were contacted for help with full-text review and data extraction process. Abstract were not included in the current analysis as these records do not report information necessary for estimating prognosis (i.e. duration of infection).

#### 1. Study related factors:

- Study design (i.e. cross-sectional/retrospective, retrospective-prospective, prospective)
- Study setting (i.e. clinical, non-clinical)
- Study population (i.e. blood donor, female cohort, dialysis patient, IDUs, community, pediatric, post-transfusion, renal transplant recipients)
- Sample size
- Country

#### 2. Host-related factors:

- Gender (n, % male)
- Mean age at assessment of liver disease (years)
- Mean age at HCV acquisition [where unavailable, data were calculated by taking the difference between mean age at assessment of liver disease and the mean duration of HCV infection] (years)
- Mean estimated duration of HCV infection (years)
- Mode of HCV acquisition (n, %: IDU, blood transfusion, sporadic)
- Excess alcohol consumption [as defined in study] (n, %)
- Mean body mass index (BMI) (kg/m<sup>2</sup>)
- History of diabetes mellitus (n, %)
- Coinfection with HBV (n, % HBsAg positive)
- Coinfection with HIV (n, %)

#### 3. Virus related factors:

- HCV genotype (n, %: G1, G2, G3, G4, other)
- HCV RNA positivity (n, %)
- HCV RNA viral load (IU/ml)

#### 4. Liver-related factors

- Elevated ALT levels (n, %)
- Mean ALT (IU/L)
- Presence of hepatic steatosis (n, %)
- Method of fibrosis assessment (e.g. LB, TE, combination LB and non-invasive)
- Method of fibrosis scoring (e.g. METAIR, Ishak, or cutoffs for non-invasive tests)
- Fibrosis stage distributions at latest available follow-up point (n, %: F0 to F4) [where data were reported as composite (i.e., F0/F1) a 50:50 distributions was applied to the 2 stages. Stage distribution was not performed if more than two stages were reported in composite]
- Liver biopsy length (mm)
- Clinical or histological diagnosis of cirrhosis (n, %)
- Mean histological activity index (HAI) Inflammatory score

**Note on missing data:** Age at infection, for studies that did not report this, was imputed by taking the difference between age at assessment and the duration of infection. For studies that report composite fibrosis stages (e.g., F0/F1), data were distributed 50:50 across F0 and F1. Stage distribution was not performed when more than two stages were reported collectively (e.g., F0/F1/F2).

## Supplementary Materials

### Supplemental References

- 1 Boonwaat L, Haber PS, Levy MH, *et al.* Establishment of a successful assessment and treatment service for Australian prison inmates with chronic hepatitis C. *Med J Aust* 2010;**192**:496–500.
- 2 Contreras AM, Ruiz I, Polanco-Cruz G, *et al.* End-stage renal disease and hepatitis C infection: comparison of alanine aminotransferase levels and liver histology in patients with and without renal damage. *Ann. Hepatol.* 2007;**6**:48–54.
- 3 Brescini L, Orsetti E, Gesuita R, *et al.* Evaluating Liver Fibrosis by Transient Elastometry in Patients With HIV-HCV Coinfection and Mono-infection. *Hepat Mon* 2014;**14**:e15426. doi:<http://dx.doi.org/10.5812/hepatmon.15426>
- 4 De Lédighen V, Barreiro P, Foucher J, *et al.* Liver fibrosis on account of chronic hepatitis C is more severe in HIV-positive than HIV-negative patients despite antiretroviral therapy. *J Viral Hepat* 2008;**15**:427–33. doi:10.1111/j.1365-2893.2007.00962.x
- 5 Nunnari G. Circulating fibrocytes as a marker of liver fibrosis in chronic hepatitis C. *Front Biosci* 2010;**E2**:1241. doi:10.2741/E184
- 6 Mazzocato S, Orsetti E, Gesuita R, *et al.* Comparison of liver fibrosis progression in HIV / HCV co-infected and HCV mono-infected patients by transient elastometry. 2014;**39**:797–802. doi:10.3109/00365548.2014.952245
- 7 Suárez-Zarracina T, Valle-Garay E, Collazos J, *et al.* Didanosine (ddl) associates with increased liver fibrosis in adult HIV-HCV coinfecting patients. *J Viral Hepat* 2012;**19**:685–93. doi:10.1111/j.1365-2893.2012.01596.x
- 8 Liu S, Cheng M, Mu M, *et al.* [Natural clearance of hepatitis C virus in 96 patients with infection acquired by blood transfusion from a single donor in Guizhou]. *Zhonghua Gan Zang Bing Za Zhi* 2014;**22**:251–4. doi:10.3760/cma.j.issn.1007-3418.2014.04.003
- 9 Valva P, Gismondi MI, Casciato PC, *et al.* Distinctive intrahepatic characteristics of paediatric and adult pathogenesis of chronic hepatitis C infection. *Clin Microbiol Infect* 2014;**20**:O998–1009. doi:10.1111/1469-0691.12728
- 10 Delgado-Borrego A, Healey D, Negre B, *et al.* Influence of body mass index on outcome of pediatric chronic hepatitis C virus infection. *J Pediatr Gastroenterol Nutr* 2010;**51**:191–7. doi:10.1097/MPG.0b013e3181d32756 10.1097/MPG.0b013e3181d32756.
- 11 Hui C-K, Zhang H-Y, Shek T, *et al.* Disease progression in Chinese chronic hepatitis C patients with persistently normal alanine aminotransferase levels. *Aliment. Pharmacol. Ther.* 2007;**25**:1283–92.
- 12 Liu T, Howell GT, Turner L, *et al.* Marijuana use in hepatitis C infection does not affect liver biopsy histology or treatment outcomes. *Can J Gastroenterol Hepatol* 2014;**28**:381–4.
- 13 Nanda KS, Brady JJ, Murray BF, *et al.* Elevated circulating osteoprotegerin and reduced matrix-metalloproteinase-9 in post-menopausal women with chronic Hepatitis C virus infection. *Cytokine.* 2012;**60**:328–33.
- 14 Siddiqui FA, Ehrinpreis MN, Janisse J, *et al.* Demographics of a large cohort of urban chronic hepatitis C patients. *Hepatol. Int.* 2008;**2**:376–81.
- 15 Hissar SS, Kumar M, Tyagi P, *et al.* Natural history of hepatic fibrosis progression in chronic hepatitis C virus infection in India. *J Gastroenterol Hepatol* 2009;**24**:581–7. doi:10.1111/j.1440-1746.2008.05649.x
- 16 Kallwitz ER, Layden-Almer J, Dhamija M, *et al.* Ethnicity and body mass index are associated with hepatitis C presentation and progression. *Clin Gastroenterol Hepatol* 2010;**8**:72–8. doi:10.1016/j.cgh.2009.08.009
- 17 Larsen C, Bousquet V, Delarocque-Astagneau E, *et al.* Hepatitis C virus genotype 3 and the risk of

## Supplementary Materials

- severe liver disease in a large population of drug users in France. *J Med Virol* 2010;**82**:1647–54. doi:10.1002/jmv.21850
- 18 Agostini H, Castera L, Melin P, *et al.* HEPACOM: multicenter, observational prospective study of outcome and monitoring of HCV positive antiviral-naive patients managed in the French health care system. *Gastroenterol. Clin. Biol.* 2007;**31**:1074–80.
- 19 Allison RD, Conry-Cantilena C, Koziol D, *et al.* A 25-year study of the clinical and histologic outcomes of hepatitis C virus infection and its modes of transmission in a cohort of initially asymptomatic blood donors. *J. Infect. Dis.* 2012;**206**:654–61.
- 20 Marabita F, Aghemo A, De Nicola S, *et al.* Genetic variation in the interleukin-28B gene is not associated with fibrosis progression in patients with chronic hepatitis C and known date of infection. *Hepatology* 2011;**54**:1127–34. doi:10.1002/hep.24503
- 21 White DL, Tavakoli-Tabasi S, Kuzniarek J, *et al.* Higher serum testosterone is associated with increased risk of advanced hepatitis C-related liver disease in males. *Hepatology* 2012;**55**:759–68. doi:10.1002/hep.24618
- 22 Reggiardo MV, Fay F, Tanno M, *et al.* Natural history of hepatitis C virus infection in a cohort of asymptomatic post-transfused subjects. *Ann Hepatol*;11:658–66.
- 23 Terrault NA, Im K, Boylan R, *et al.* Fibrosis progression in African Americans and Caucasian Americans with chronic hepatitis C. *Clin Gastroenterol Hepatol* 2008;**6**:1403–11. doi:10.1016/j.cgh.2008.08.006
- 24 Guyader D, Thirouard A-S, Erdtmann L, *et al.* Liver iron is a surrogate marker of severe fibrosis in chronic hepatitis C. *J Hepatol* 2007;**46**:587–95. doi:10.1016/j.jhep.2006.09.021
- 25 Pradat P, Voirin N, Tillmann HL, *et al.* Progression to cirrhosis in hepatitis C patients: An age-dependent process. *Liver Int* 2007;**27**:335–9. doi:10.1111/j.1478-3231.2006.01430.x
- 26 Castéra L, Hézode C, Roudot-Thoraval F, *et al.* Effect of antiviral treatment on evolution of liver steatosis in patients with chronic hepatitis C: indirect evidence of a role of hepatitis C virus genotype 3 in steatosis. *Gut* 2004;**53**:420–4.
- 27 Mathurin P. Slow progression rate of fibrosis in hepatitis C virus patients with persistently normal alanine transaminase activity. *Hepatology* 1998;**27**:868–72. doi:10.1002/hep.510270333
- 28 Cepeda JA, Thomas DL, Astemborski J, *et al.* Liver disease progression in a community-based sample of HCV-infected PWID. *Top Antivir Med* 2016;**24 (E-1)**:218.
- 29 Cepeda JA, Thomas DL, Astemborski J, *et al.* Increased mortality among persons with chronic hepatitis C with moderate or severe liver disease: a cohort study. *Clin Infect Dis* 2017;**10**:10. doi:https://dx.doi.org/10.1093/cid/cix207
- 30 Bourliere M, Ouzan D, Rosenheim M, *et al.* Pegylated interferon-alpha2a plus ribavirin for chronic hepatitis C in a real-life setting: the Hepatys French cohort (2003-2007). *Antivir Ther* 2012;**17**:101–10. doi:http://dx.doi.org/10.3851/IMP1935
- 31 Lemos LB, Perez RM, Lemos MM, *et al.* Hepatitis C in chronic kidney disease: Predialysis patients present more severe histological liver injury than hemodialysis patients? *Am J Nephrol* 2007;**27**:191–6. doi:10.1159/000100892
- 32 Delladetsima I, Psychogiou M, Sypsa V, *et al.* Time of acquisition of HCV infection in renal transplant recipients: a major prognostic factor for disease progression. *Clin Transpl* 2013;**27**:72–9. doi:10.1111/ctr.12012
- 33 Besheer T, El-Bendary M, Elalfy H, *et al.* Prediction of Fibrosis Progression Rate in Patients with Chronic Hepatitis C Genotype 4: Role of Cirrhosis Risk Score and Host Factors. *J Interf Cytokine Res* 2017;**37**:97–102. doi:10.1089/jir.2016.0111

## Supplementary Materials

- 1  
2  
3 34 Sakellariou S, Boletis JN, Sypsa V, *et al.* Histological features of chronic hepatitis C in haemodialysis  
4 patients. *Liver Int* 2014;**34**:e56-61. doi:<https://dx.doi.org/10.1111/liv.12413>
- 5 35 Forestier N, Gaus A, Herrmann E, *et al.* Acoustic radiation force impulse imaging for evaluation of  
6 antiviral treatment response in chronic hepatitis C. *J Gastrointest Liver Dis* 2012;**21**:367–73.
- 7  
8 36 Goodman ZD, Makhlof HR, Liu L, *et al.* Pathology of chronic hepatitis C in children: liver biopsy findings  
9 in the Peds-C Trial. *Hepatology* 2008;**47**:836–43. doi:10.1002/hep.22094
- 10 37 Rao H-Y, Sun D-G, Yang R-F, *et al.* Outcome of hepatitis C virus infection in Chinese paid plasma  
11 donors: a 12-19-year cohort study. *J Gastroenterol Hepatol.* 2012;**27**:526–32.
- 12 38 Werner T, Aqel B, Balan V, *et al.* Treatment of hepatitis C in renal transplantation candidates: a single-  
13 center experience. *Transplantation.* 2010;**90**:407–11.
- 14 39 Bochud P-Y, Cai T, Overbeck K, *et al.* Genotype 3 is associated with accelerated fibrosis progression in  
15 chronic hepatitis C. *J Hepatol* 2009;**51**:655–66. doi:10.1016/j.jhep.2009.05.016
- 16 40 Kielland KB, Delaveris GJ, Rogde S, *et al.* Liver fibrosis progression at autopsy in injecting drug users  
17 infected by hepatitis C: a longitudinal long-term cohort study. *J Hepatol* 2014;**60**:260–6.  
18 doi:10.1016/j.jhep.2013.09.022
- 19 41 Lawson A, Trent Hepatitis CSG. Hepatitis C virus-infected patients with a persistently normal alanine  
20 aminotransferase: do they exist and is this really a group with mild disease? *J Viral Hepat* 2010;**17**:51–8.  
21 doi:10.1111/j.1365-2893.2009.01148.x
- 22 42 Patin E, Kotalik Z, Guergnon J, *et al.* Genome-wide association study identifies variants associated with  
23 progression of liver fibrosis from HCV infection. *Gastroenterology* 2012;**143**:1212–44.  
24 doi:10.1053/j.gastro.2012.07.097
- 25 43 Midgard H, Hajarizadeh B, Cunningham EB, *et al.* Changes in risk behaviours during and following  
26 treatment for hepatitis C virus infection among people who inject drugs: The ACTIVATE study. *Int J Drug*  
27 *Policy* 2017;**47**:230–8. doi:10.1016/j.drugpo.2017.05.040
- 28 44 Chen Yi Mei SLG, Thompson AJ, Christensen B, *et al.* Sustained virological response halts fibrosis  
29 progression: A long-term follow-up study of people with chronic hepatitis C infection. *PLoS ONE* 12(10)  
30 2017;**12**:1–12.
- 31 45 Bruden DJ, McMahon BJ, Townshend-Bulson L, *et al.* Risk of End Stage Liver Disease, Hepatocellular  
32 Carcinoma and Liver-Related Death By Fibrosis Stage in the Hepatitis C Alaska Cohort. *Hepatology*  
33 Published Online First: 2017. doi:10.1002/hep.29115
- 34 46 Castéra L, Vergniol J, Foucher J, *et al.* Prospective comparison of transient elastography, Fibrotest,  
35 APRI, and liver biopsy for the assessment of fibrosis in chronic hepatitis C. *Gastroenterology*  
36 2005;**128**:343–50. doi:10.1053/j.gastro.2004.11.018
- 37 47 Delgado-Borrego A, Jordan SH, Negre B, *et al.* Reduction of Insulin Resistance With Effective Clearance  
38 of Hepatitis C Infection: Results From the HALT-C Trial. *Clin Gastroenterol Hepatol* 2010;**8**:458–62.
- 39  
40  
41  
42  
43  
44  
45  
46  
47  
48  
49  
50  
51  
52  
53  
54  
55  
56  
57  
58  
59  
60



## MOOSE Checklist for Meta-analyses of Observational Studies

| Item No                                     | Recommendation                                                                                                 | Reported on Page No                             |
|---------------------------------------------|----------------------------------------------------------------------------------------------------------------|-------------------------------------------------|
| Reporting of background should include      |                                                                                                                |                                                 |
| 1                                           | Problem definition                                                                                             | 5-6                                             |
| 2                                           | Hypothesis statement                                                                                           | 6;<br>[Objectives-Descriptive study]            |
| 3                                           | Description of study outcome(s)                                                                                | 6                                               |
| 4                                           | Type of exposure or intervention used                                                                          | 6<br>[Natural history of CHC (treatment-naïve)] |
| 5                                           | Type of study designs used                                                                                     | 6                                               |
| 6                                           | Study population                                                                                               | 6                                               |
| Reporting of search strategy should include |                                                                                                                |                                                 |
| 7                                           | Qualifications of searchers (eg, librarians and investigators)                                                 | 6-7                                             |
| 8                                           | Search strategy, including time period included in the synthesis and key words                                 | 6-7, [56-58; Supplemental methods]              |
| 9                                           | Effort to include all available studies, including contact with authors                                        | 6-7, [56-58; Supplemental methods]              |
| 10                                          | Databases and registries searched                                                                              | 6-7, [55-58; Supplemental methods]              |
| 11                                          | Search software used, name and version, including special features used (eg, explosion)                        | 6-7, [56-58; Supplemental methods]              |
| 12                                          | Use of hand searching (eg, reference lists of obtained articles)                                               | 6-7                                             |
| 13                                          | List of citations located and those excluded, including justification                                          | [Figure 1]<br>[29-31; Supplemental methods]     |
| 14                                          | Method of addressing articles published in languages other than English                                        | 7, [59; Supplemental methods]                   |
| 15                                          | Method of handling abstracts and unpublished studies                                                           | 7, [59; Supplemental methods]                   |
| 16                                          | Description of any contact with authors                                                                        | 7, [59; Supplemental methods]                   |
| Reporting of methods should include         |                                                                                                                |                                                 |
| 17                                          | Description of relevance or appropriateness of studies assembled for assessing the hypothesis to be tested     | 7-8; [Table1]                                   |
| 18                                          | Rationale for the selection and coding of data (eg, sound clinical principles or convenience)                  | 7,27,54<br>[TableS1]                            |
| 19                                          | Documentation of how data were classified and coded (eg, multiple raters, blinding and interrater reliability) | 7,27,54<br>[TableS1]                            |
| 20                                          | Assessment of confounding (eg, comparability of cases and controls in studies where appropriate)               | 8-9                                             |
| 21                                          | Assessment of study quality, including blinding of quality assessors, stratification or                        | 8-9                                             |

|                                     |                                                                                                                                                                                                                                                                              |                                                    |
|-------------------------------------|------------------------------------------------------------------------------------------------------------------------------------------------------------------------------------------------------------------------------------------------------------------------------|----------------------------------------------------|
|                                     | regression on possible predictors of study results                                                                                                                                                                                                                           |                                                    |
| 22                                  | Assessment of heterogeneity                                                                                                                                                                                                                                                  | 9                                                  |
| 23                                  | Description of statistical methods (eg, complete description of fixed or random effects models, justification of whether the chosen models account for predictors of study results, dose-response models, or cumulative meta-analysis) in sufficient detail to be replicated | 8-9                                                |
| 24                                  | Provision of appropriate tables and graphics                                                                                                                                                                                                                                 | [Fig1];<br>[Figure S2-S5;<br>Supplemental Methods] |
| Reporting of results should include |                                                                                                                                                                                                                                                                              |                                                    |
| 25                                  | Graphic summarizing individual study estimates and overall estimate                                                                                                                                                                                                          | [FigS1;<br>FigS2-FigS5;<br>Supplemental Methods]   |
| 26                                  | Table giving descriptive information for each study included                                                                                                                                                                                                                 | [TableS3,<br>TableS4;<br>Supplemental Methods]     |
| 27                                  | Results of sensitivity testing (eg, subgroup analysis)                                                                                                                                                                                                                       | 11-13;<br>[Table2],<br>[Fig2],<br>[TableS7]        |
| 28                                  | Indication of statistical uncertainty of findings                                                                                                                                                                                                                            | 12-13;<br>[Table2],<br>[Table 3]                   |

| Item No                                 | Recommendation                                                                                                            | Reported on Page No |
|-----------------------------------------|---------------------------------------------------------------------------------------------------------------------------|---------------------|
| Reporting of discussion should include  |                                                                                                                           |                     |
| 29                                      | Quantitative assessment of bias (eg, publication bias)                                                                    | 14-15               |
| 30                                      | Justification for exclusion (eg, exclusion of non-English language citations)                                             | 16                  |
| 31                                      | Assessment of quality of included studies                                                                                 | 16                  |
| Reporting of conclusions should include |                                                                                                                           |                     |
| 32                                      | Consideration of alternative explanations for observed results                                                            | 14                  |
| 33                                      | Generalization of the conclusions (ie, appropriate for the data presented and within the domain of the literature review) | 14-15               |
| 34                                      | Guidelines for future research                                                                                            | 15-16               |
| 35                                      | Disclosure of funding source                                                                                              | 1                   |

From: Stroup DF, Berlin JA, Morton SC, et al, for the Meta-analysis Of Observational Studies in Epidemiology (MOOSE) Group. Meta-analysis of Observational Studies in Epidemiology. A Proposal for Reporting. *JAMA*. 2000;283(15):2008-2012. doi: 10.1001/jama.283.15.2008.
