# Supplementary material for: Estimation of fibrosis progression rates for chronic hepatitis C: a systematic review and meta-analysis update
Source: PubMed Central journal article supplement — BMJ Open. 2019 Nov 11;9(11):e027491. doi: 10.1136/bmjopen-2018-027491 (PMC6858137; doi:10.1136/bmjopen-2018-027491), 2019-11-11
Supplement: bmjopen-2018-027491supp001.pdf [file bmjopen-2018-027491supp001.pdf]

## Supplementary Materials

### List of Supplementary Materials:

1. S1 Figure Funnel plots for hepatic fibrosis progression rates.
2. S1 Table: General definitions of study type, setting, and population
3. S2 Table: Fibrosis scoring systems for HCV
4. List of 45 studies identified by updated review
5. S3 Table: Table summarizing study characteristics of the 45 identified studies
6. S4 Table: Table summarizing patient characteristics for the 45 identified
7. S5 Table: Summary of subgroups excluded from the meta-analysis
8. S6 Table: Summary of clinical characteristics of study subjects stratified by review update
9. S7 Table: Hepatic fibrosis progression rates stratified by review update
10. S2 Figure: Forrest plot for fibrosis progression rate from F0 to F1
11. S3 Figure: Forrest plot for fibrosis progression rate from F1 to F2
12. S4 Figure: Forrest plot for fibrosis progression rate from F2 to F3
13. S5 Figure: Forrest plot for fibrosis progression rate from F3 to F4
14. S8 Table: Covariate-adjusted hepatic fibrosis progression rates for CHC subgroups
15. S9 Table: Univariate random effects meta-regression of covariates associated with fibrosis progression
16. Database search strategy and search strings
17. List of extracted data items
18. Supplemental References

## Supplementary Materials

S1 Figure: Funnel plots for hepatic fibrosis progression rate

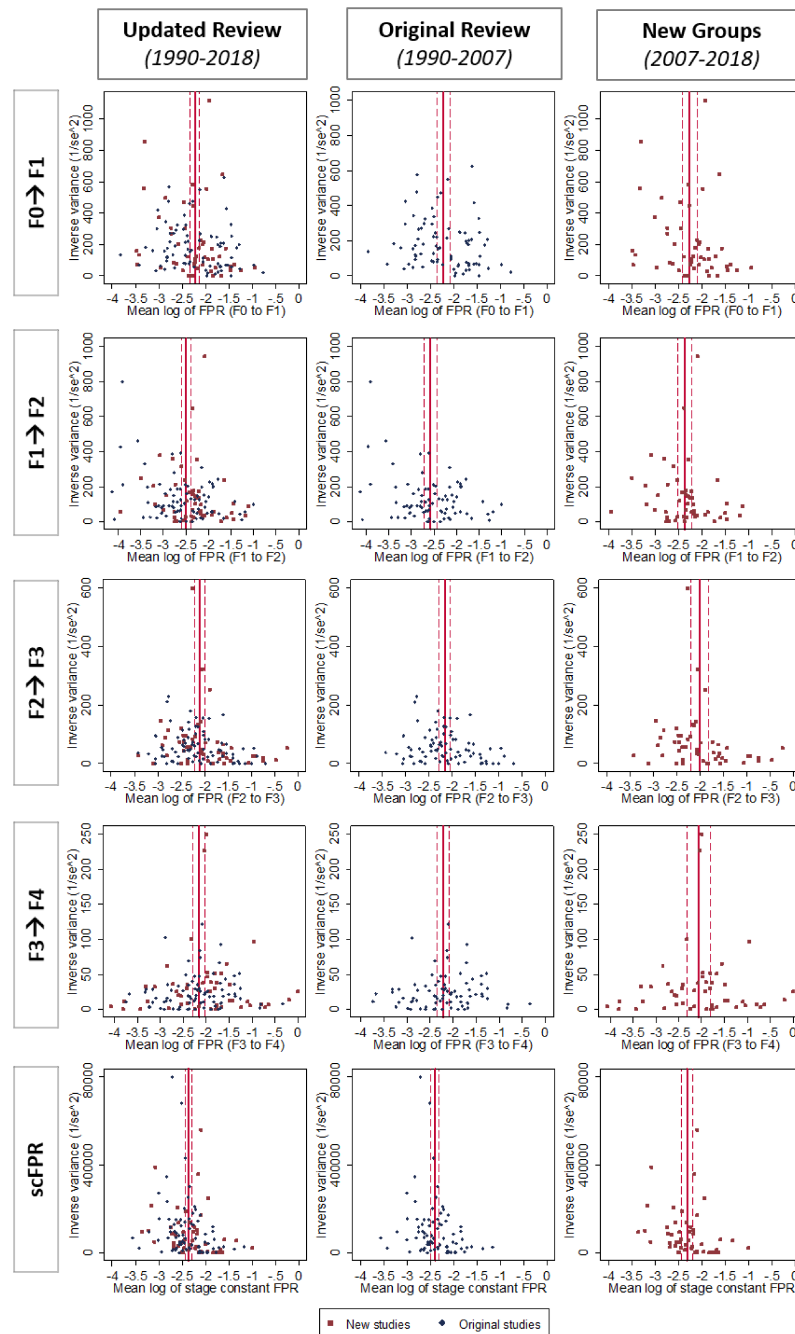

Supplementary Figure 1. Funnel plots of stage-specific and stage-constant (sc) FPRs for the 131 study groups included in the meta-analysis stratified by study update. Funnel plots were generated by plotting the natural log of FPRs against inverse variance.

## Supplementary Materials

S1 Table: General definitions of study type, setting, and population

| <b>Study design</b>                 |                                                                                                                                                                                                                                                                                                                              |
|-------------------------------------|------------------------------------------------------------------------------------------------------------------------------------------------------------------------------------------------------------------------------------------------------------------------------------------------------------------------------|
| Cross-sectional/retrospective:      | Patients with liver disease presenting for clinical care, usually at tertiary care centers, where efforts were made to track the liver disease responsible for the referral back to the presumed time of infection, based on the history of receipt of blood or blood product or of the first use of injection drugs [1–17]. |
| Retrospective-prospective:          | Studies that identify groups of individuals who, in the past, were either asymptomatic or had developed recognized acute hepatitis C following an outbreak of HCV infection from a recognized source, who could be traced retrospectively, recontacted, and then followed-up prospectively [18–41].                          |
| <b>Study setting</b>                |                                                                                                                                                                                                                                                                                                                              |
| Clinical:                           | Individuals who were identified and/or assessed for their HCV status and liver disease in a clinical/tertiary care setting [2,3,12,14–16,20,21,23–26,4,27,30,35,36,38,39,41–44,5–11].                                                                                                                                        |
| Nonclinical:                        | Individuals who were screened for HCV in a nonclinical setting, for example, blood donation center or regional center [1,13,17–19,22,28,29,37,40].                                                                                                                                                                           |
| <b>Study population:</b>            |                                                                                                                                                                                                                                                                                                                              |
| Community:                          | HCV-infected individuals identified or participating in national health screening or studies conducted in nonclinical settings [18,45].                                                                                                                                                                                      |
| Liver clinic:                       | HCV-infected individuals referred to specialist liver clinics for further assessment [1,4,23–27,30,33,35,39,41,9,42,44,11,12,14–16,20,21].                                                                                                                                                                                   |
| Blood donors:                       | Individuals newly diagnosed with chronic HCV infection at blood donor screening [19,37].                                                                                                                                                                                                                                     |
| Dialysis patients:                  | HCV-infected individuals with end-stage renal disease receiving dialysis and awaiting renal transplantation [2,31,34].                                                                                                                                                                                                       |
| Injecting drug users:               | Individuals who acknowledged injection drug use as the main risk factor for HCV infection – not only active users [17,28,29,40,43].                                                                                                                                                                                          |
| Female cohorts:                     | Population of otherwise healthy females infected with HCV [13].                                                                                                                                                                                                                                                              |
| Pediatric population:               | Population of children infected with HCV [10,36].                                                                                                                                                                                                                                                                            |
| Post-transfusion cohorts:           | Population infected with HCV post-transfusion [8,22].                                                                                                                                                                                                                                                                        |
| Renal transplant:                   | Population renal transplant recipients infected with HCV [32,38].                                                                                                                                                                                                                                                            |
| Infectious diseases:                | HCV infected individuals managed at Infectious diseases unit [3,5–7].                                                                                                                                                                                                                                                        |
| <b>General:</b>                     |                                                                                                                                                                                                                                                                                                                              |
| Presumed date of HCV infection      | Date of transfusion of blood or blood products prior to 1992, when serologic screening for HCV became widely available, the first year of injecting drug use, or the date of a single and convincing parenteral exposure (e.g. needle-stick injury).                                                                         |
| Estimated duration of HCV infection | Time elapsed from the presumed date of infection to the date of liver biopsy. Estimated only for individuals with known risk factors.                                                                                                                                                                                        |
| Elevated ALT levels                 | ALT values abnormally elevated (more than the upper limit of normal values) at entry and at least once during the 6 months prior to screening.                                                                                                                                                                               |
| Excess alcohol consumption          | Accepted the definitions reported in the studies. Alcohol consumption of at least more than 20 g/day in the past 12 months of study entry.                                                                                                                                                                                   |

Supplementary Table 1. Abbreviations: HCV: hepatitis C virus; ALT: alanine aminotransferase. References provided for newly identified studies only.

## Supplementary Materials

S2 Table: Fibrosis scoring systems for HCV

| HCV disease severity     | Liver Biopsy (LB)                       |           |         |       | Transient Elastography (TE)       |       |            |
|--------------------------|-----------------------------------------|-----------|---------|-------|-----------------------------------|-------|------------|
|                          | Histological Scoring Systems            |           |         |       | Liver Stiffness Measurement (LSM) |       |            |
|                          | METAVIR                                 |           | Knodell | Ishak | LSM cut-off (kPa)                 | AUROC | References |
| <b>No fibrosis</b>       | <b>No fibrosis</b>                      | <b>F0</b> | F0      | 0     | <7.1                              | -     | [46]       |
| <b>Mild fibrosis</b>     | <b>Portal fibrosis without septa</b>    | <b>F1</b> | F1      | 1     | <7.1                              | -     |            |
| <b>Moderate fibrosis</b> | <b>Portal fibrosis with rare septa</b>  | <b>F2</b> | F3      | 2     | 7.1-9.5                           | 0.83  |            |
| <b>Severe fibrosis</b>   | <b>Numerous septa without cirrhosis</b> | <b>F3</b> | F3      | 3-4   | 9.5-12.5                          | 0.84  |            |
| <b>Cirrhosis</b>         | <b>Cirrhosis</b>                        | <b>F4</b> | F4      | 5-6   | ≥12.5                             | 0.95  |            |

Supplementary Table 2. Table showing the criteria used to convert various invasive and non-invasive scoring systems to the well-validated METAVIR system. Majority of study groups (124 out of 131 study groups included in the meta-analysis) assessed hepatic fibrosis using histology; only 7 performed a non-invasive assessment of hepatic fibrosis (6 used LSM and 1 used a combination of LSM, LB and APRI). Studies that reported composite scores i.e., F0/F1 were distributed 50:50 across F0 and F1. *Abbreviations: LB: liver biopsy; TE: transient elastography/FibroScan; LSM: liver stiffness measurement; LB: liver biopsy; APRI: AST to platelet ratio index; METAVIR: meta-analysis of histological data in viral hepatitis; AUROC: area under the receiver operator curve.*

## Supplementary Materials

### List of 45 studies identified by the updated review ordered by study ID:

1. Agostini, H., Castera, L., Melin, P., Cattan, L. & Roudot-Thoraval, F. HEPACOM: multicenter, observational prospective study of outcome and monitoring of HCV positive antiviral-naïve patients managed in the French health care system. *Gastroenterologie clinique et biologique* **31**, 1074–1080 (2007).
2. Allison, R. D. *et al.* A 25-year study of the clinical and histologic outcomes of hepatitis C virus infection and its modes of transmission in a cohort of initially asymptomatic blood donors. **206**, 654–661 (2012).
3. Boonwaat, L., Haber, P. S., Levy, M. H. & Lloyd, A. R. Establishment of a successful assessment and treatment service for Australian prison inmates with chronic hepatitis C. *Med J Aust* **192**, 496–500 (2010).
4. Bourliere, M. *et al.* Pegylated interferon-alpha2a plus ribavirin for chronic hepatitis C in a real-life setting: the Hepatys French cohort (2003-2007). *Antivir Ther* **17**, 101–110 (2012).
5. Contreras, A. M. *et al.* End-stage renal disease and hepatitis C infection: comparison of alanine aminotransferase levels and liver histology in patients with and without renal damage. *Annals of hepatology* **6**, 48–54 (2007).
6. Delgado-Borrego, A. *et al.* Influence of body mass index on outcome of pediatric chronic hepatitis C virus infection. *J Pediatr Gastroenterol Nutr* **51**, 191–197 (2010).
7. Forestier, N. *et al.* Acoustic radiation force impulse imaging for evaluation of antiviral treatment response in chronic hepatitis C. *J. Gastrointest. Liver Dis.* **21**, 367–373 (2012).
8. Goodman, Z. D. *et al.* Pathology of chronic hepatitis C in children: liver biopsy findings in the Peds-C Trial. *Hepatology* **47**, 836–843 (2008).
9. Hui, C.-K. *et al.* Disease progression in Chinese chronic hepatitis C patients with persistently normal alanine aminotransaminase levels. *Alimentary pharmacology & therapeutics* **25**, 1283–1292 (2007).
10. Liu, T. *et al.* Marijuana use in hepatitis C infection does not affect liver biopsy histology or treatment outcomes. **28**, 381–384 (2014).
11. Nanda, K. S. *et al.* Elevated circulating osteoprotegerin and reduced matrix-metalloprotease-9 in post-menopausal women with chronic Hepatitis C virus infection. *Cytokine* **60**, 328–333 (2012).
12. Rao, H.-Y. *et al.* Outcome of hepatitis C virus infection in Chinese paid plasma donors: a 12-19-year cohort study. *Journal of gastroenterology and hepatology* **27**, 526–532 (2012).
13. Siddiqui, F. A. *et al.* Demographics of a large cohort of urban chronic hepatitis C patients. *Hepatology international* **2**, 376–381 (2008).
14. Werner, T. *et al.* Treatment of hepatitis C in renal transplantation candidates: a single-center experience. *Transplantation* **90**, 407–411 (2010).
15. Bochud, P.-Y. *et al.* Genotype 3 is associated with accelerated fibrosis progression in chronic hepatitis C. *J. Hepatol.* **51**, 655–66 (2009).
16. Hissar, S. S. *et al.* Natural history of hepatic fibrosis progression in chronic hepatitis C virus infection in India. *J Gastroenterol Hepatol* **24**, 581–587 (2009).
17. Kallwitz, E. R. *et al.* Ethnicity and body mass index are associated with hepatitis C presentation and progression. *Clin Gastroenterol Hepatol* **8**, 72–78 (2010).
18. Kielland, K. B. *et al.* Liver fibrosis progression at autopsy in injecting drug users infected by hepatitis C: a longitudinal long-term cohort study. *J Hepatol* **60**, 260–266 (2014).
19. Larsen, C. *et al.* Hepatitis C virus genotype 3 and the risk of severe liver disease in a large population of drug

## Supplementary Materials

- users in France. *J Med Virol* **82**, 1647–1654 (2010).
20. Lawson, A. & Trent Hepatitis, C. S. G. Hepatitis C virus-infected patients with a persistently normal alanine aminotransferase: do they exist and is this really a group with mild disease? *J Viral Hepat* **17**, 51–58 (2010).
  21. Marabita, F. *et al.* Genetic variation in the interleukin-28B gene is not associated with fibrosis progression in patients with chronic hepatitis C and known date of infection. *Hepatology* **54**, 1127–1134 (2011).
  22. Patin, E. *et al.* Genome-wide association study identifies variants associated with progression of liver fibrosis from HCV infection. *Gastroenterology* **143**, 1212–1244 (2012).
  23. Brescini, L. *et al.* Evaluating Liver Fibrosis by Transient Elastometry in Patients With HIV-HCV Coinfection and Mono-infection. *Hepat. Mon.* **14**, e15426 (2014).
  24. de Lédighen, V. *et al.* Liver fibrosis on account of chronic hepatitis C is more severe in HIV-positive than HIV-negative patients despite antiretroviral therapy. *J. Viral Hepat.* **15**, 427–33 (2008).
  25. Nunnari, G. Circulating fibrocytes as a marker of liver fibrosis in chronic hepatitis C. *Front. Biosci.* **E2**, 1241 (2010).
  26. Mazzocato, S. *et al.* Comparison of liver fibrosis progression in HIV / HCV co-infected and HCV mono-infected patients by transient elastometry. **39**, 797–802 (2014).
  27. Suárez-Zarracina, T. *et al.* Didanosine (ddl) associates with increased liver fibrosis in adult HIV-HCV coinfecting patients. *J. Viral Hepat.* **19**, 685–93 (2012).
  28. White, D. L. *et al.* Higher serum testosterone is associated with increased risk of advanced hepatitis C-related liver disease in males. *Hepatology* **55**, 759–68 (2012).
  29. Reggiardo, M. V. *et al.* Natural history of hepatitis C virus infection in a cohort of asymptomatic post-transfused subjects. *Ann. Hepatol.* **11**, 658–66 (2015).
  30. Liu, S., Cheng, M., Mu, M. & Yang, Q. [Natural clearance of hepatitis C virus in 96 patients with infection acquired by blood transfusion from a single donor in Guizhou]. *Zhonghua Gan Zang Bing Za Zhi* **22**, 251–4 (2014).
  31. Terrault, N. A. *et al.* Fibrosis progression in African Americans and Caucasian Americans with chronic hepatitis C. *Clin Gastroenterol Hepatol* **6**, 1403–1411 (2008).
  32. Guyader, D. *et al.* Liver iron is a surrogate marker of severe fibrosis in chronic hepatitis C. *J. Hepatol.* **46**, 587–95 (2007).
  33. Pradat, P., Voirin, N., Tillmann, H. L., Chevallier, M. & Trépo, C. Progression to cirrhosis in hepatitis C patients: An age-dependent process. *Liver Int.* **27**, 335–339 (2007).
  34. Castéra, L. *et al.* Effect of antiviral treatment on evolution of liver steatosis in patients with chronic hepatitis C: indirect evidence of a role of hepatitis C virus genotype 3 in steatosis. *Gut* **53**, 420–4 (2004).
  35. Mathurin, P. Slow progression rate of fibrosis in hepatitis C virus patients with persistently normal alanine transaminase activity. *Hepatology* **27**, 868–872 (1998).
  36. Bruden DJ, McMahon BJ, Townshend-Bulson L, *et al.* Risk of End Stage Liver Disease, Hepatocellular Carcinoma and Liver-Related Death By Fibrosis Stage in the Hepatitis C Alaska Cohort. *Hepatology*. 2017. doi:10.1002/hep.29115.
  37. Cepeda JA, Thomas DL, Astemborski J, Kong X, Kirk GD, Mehta SH. Liver disease progression in a community-based sample of HCV-infected PWID. *Top Antivir Med.* 2016;24 (E-1):218.
  38. Cepeda JA, Thomas DL, Astemborski J, Sulkowski MS, Kirk GD, Mehta SH. Increased mortality among persons with chronic hepatitis C with moderate or severe liver disease: a cohort study. *Clin Infect Dis.* 2017;10:10. doi:https://dx.doi.org/10.1093/cid/cix207.

### Supplementary Materials

39. Sakellariou S, Boletis JN, Sypsa V, Psychogiou M, Tiniakos D, Delladetsima I. Histological features of chronic hepatitis C in haemodialysis patients. *Liver Int.* 2014;34(6):e56-61. doi:<https://dx.doi.org/10.1111/liv.12413>.
40. Lemos LB, Perez RM, Lemos MM, et al. Hepatitis C in chronic kidney disease: predialysis patients present more severe histological liver injury than hemodialysis patients? *Am J Nephrol.* 2007;27(2):191-196. doi:10.1159/000100892.
41. Delladetsima I, Psychogiou M, Sypsa V, Sakellariou S, Hatzakis A, J NB. Time of acquisition of HCV infection in renal transplant recipients: a major prognostic factor for disease progression. *Clin Transpl.* 2013;27(1):72-79. doi:10.1111/ctr.12012.
42. Besheer T, El-Bendary M, Elalfy H, et al. Prediction of Fibrosis Progression Rate in Patients with Chronic Hepatitis C Genotype 4: Role of Cirrhosis Risk Score and Host Factors. *J Interf Cytokine Res.* 2017;37(3):97-102. doi:10.1089/jir.2016.0111.
43. Midgard H, Hajarizadeh B, Cunningham EB, et al. International Journal of Drug Policy Changes in risk behaviours during and following treatment for hepatitis C virus infection among people who inject drugs : The ACTIVATE study. 2017;47:230-238. doi:10.1016/j.drugpo.2017.05.040.
44. Chen Yi Mei SLG, Thompson AJ, Christensen B, et al. Sustained virological response halts fibrosis progression : A long-term follow-up study of people with chronic hepatitis C infection. *PLoS ONE* 12(10). 2017;12(10):1-12.
45. Valva P, Gismondi MI, Casciato PC, et al. Distinctive intrahepatic characteristics of paediatric and adult pathogenesis of chronic hepatitis C infection. *Clin Microbiol Infect.* 2014;20(12):O998-O1009. doi:10.1111/1469-0691.12728.

NOTE: Studies that reported results in subgroups, which may influence disease progression were extracted separately. Also, Of the 45 identified studies, only studies that established HCV RNA positivity for all study subjects were included in the meta-analysis.

## Supplementary Materials

S3 Table: Table summarizing study characteristics of the 45 identified studies

| Study ID | Study                    | Year | Country   | Language | Population          | Setting      | Design | Study SS | Biopsy SS | Assessment Method | Scoring system | Progression rates                                                                                                                    |
|----------|--------------------------|------|-----------|----------|---------------------|--------------|--------|----------|-----------|-------------------|----------------|--------------------------------------------------------------------------------------------------------------------------------------|
| 1        | Agostini 2007 [18]       | 2007 | France    | English  | Community           | Non-clinical | R-P    | 3794     | 1283      | LB                | METAVIR        | FPR <sub>0→1</sub> : 0.119<br>FPR <sub>1→2</sub> : 0.182<br>FPR <sub>2→3</sub> : 0.186<br>FPR <sub>3→4</sub> : 0.069<br>ScFPR: 0.137 |
| 2        | Allison 2012 [19]        | 2012 | USA       | English  | Blood donor         | Non-clinical | R-P    | 185      | 185       | LB                | Ishak          | FPR <sub>0→1</sub> : 0.044<br>FPR <sub>1→2</sub> : 0.072<br>FPR <sub>2→3</sub> : 0.047<br>FPR <sub>3→4</sub> : 0.022<br>ScFPR: 0.050 |
| 3        | Boonwaat 2010 [1]        | 2010 | Australia | English  | Liver clinic/prison | Non-clinical | C-S/R  | 371      | 153       | LB                | METAVIR        | FPR <sub>0→1</sub> : 0.085<br>FPR <sub>1→2</sub> : 0.114<br>FPR <sub>2→3</sub> : 0.148<br>FPR <sub>3→4</sub> : 0.047<br>ScFPR: 0.095 |
| 4        | Bourliere 2012 [30]      | 2012 | France    | English  | Liver clinic        | Clinical     | R-P    | 2066     | 1794      | LB                | METAVIR        | FPR <sub>0→1</sub> : 0.118<br>FPR <sub>1→2</sub> : 0.101<br>FPR <sub>2→3</sub> : 0.084<br>FPR <sub>3→4</sub> : 0.111<br>ScFPR: 0.100 |
| 5        | Contreras 2007 [2]       | 2007 | Mexico    | English  | Dialysis patients   | Clinical     | C-S/R  | 64       | 64        | LB                | Ishak          | FPR <sub>0→1</sub> : 0.113<br>FPR <sub>1→2</sub> : 0.205<br>FPR <sub>2→3</sub> : 0.103<br>FPR <sub>3→4</sub> : 0.123<br>ScFPR: 0.130 |
| 6        | Delgado-Borego 2010 [47] | 2010 | USA       | English  | Pediatric           | Clinical     | C-S/R  | 102      | 102       | LB                | METAVIR        | FPR <sub>0→1</sub> : 0.203<br>FPR <sub>1→2</sub> : 0.071<br>FPR <sub>2→3</sub> : 0.220<br>FPR <sub>3→4</sub> : 0.034<br>ScFPR: 0.131 |
| 7        | Forestier 2012 [35]      | 2012 | France    | English  | Liver clinic        | Clinical     | R-P    | 98       | 45        | LB                | METAVIR        | FPR <sub>0→1</sub> : 0.208<br>FPR <sub>1→2</sub> : 0.122<br>FPR <sub>2→3</sub> : 0.123<br>FPR <sub>3→4</sub> : 0.219<br>ScFPR: 0.152 |
| 8        | Goodman 2008 [36]        | 2008 | USA       | English  | Pediatric           | Clinical     | R-P    | 121      | 121       | LB                | Knodell        | FPR <sub>0→1</sub> : 0.200<br>FPR <sub>1→2</sub> : 0.106<br>FPR <sub>2→3</sub> : 0.038<br>FPR <sub>3→4</sub> : 0.129<br>ScFPR: 0.137 |
| 9        | Hui 2007 [11]            | 2007 | China     | English  | Liver clinic        | Clinical     | C-S/R  | 82       | 53        | LB                | METAVIR        | FPR <sub>0→1</sub> : 0.033<br>FPR <sub>1→2</sub> : 0.042<br>FPR <sub>2→3</sub> : 0.095<br>FPR <sub>3→4</sub> : 0.072<br>ScFPR: 0.041 |



## Supplementary Materials

| Study ID | Study              | Year | Country     | Language | Population       | Setting      | Design            | Study SS | Biopsy SS | Assessment Method | Scoring system   | Progression rates                                                                                                               |
|----------|--------------------|------|-------------|----------|------------------|--------------|-------------------|----------|-----------|-------------------|------------------|---------------------------------------------------------------------------------------------------------------------------------|
| 10a      | Liu 2014 – M [12]  | 2014 | Canada      | English  | Liver clinic     | Clinical     | C-S/R             | 102      | 102       | LB                | Batts and Ludwig | FPR <sub>0→1</sub> :0.145<br>FPR <sub>1→2</sub> :0.159<br>FPR <sub>2→3</sub> :0.083<br>FPR <sub>3→4</sub> :0.123<br>ScFPR:0.130 |
| 10b      | Liu 2014 – M [12]  | 2014 | Canada      | English  | Liver clinic     | Clinical     | C-S/R             | 275      | 275       | LB                | Batts and Ludwig | FPR <sub>0→1</sub> :0.145<br>FPR <sub>1→2</sub> :0.109<br>FPR <sub>2→3</sub> :0.071<br>FPR <sub>3→4</sub> :0.102<br>ScFPR:0.110 |
| 11       | Nanda 2012 [13]    | 2012 | Ireland     | English  | Female           | Non-clinical | C-S/R             | 20       | 20        | LB                | Ishak            | FPR <sub>0→1</sub> :0.023<br>FPR <sub>1→2</sub> :0.046<br>FPR <sub>2→3</sub> :0.098<br>FPR <sub>3→4</sub> :0.164<br>ScFPR:0.033 |
| 12       | Rao 2012 [37]      | 2012 | China       | English  | Blood donor      | Non-clinical | R-P               | 348      | 175       | LSM               | METAVIR          | FPR <sub>0→1</sub> :0.054<br>FPR <sub>1→2</sub> :0.082<br>FPR <sub>2→3</sub> :0.116<br>FPR <sub>3→4</sub> :0.113<br>ScFPR:0.068 |
| 13a      | Siddiqui 2008 [14] | 2008 | USA         | English  | Liver clinic     | Clinical     | C-S/R             | 2035     | 1009      | LB                | METAVIR          | FPR <sub>0→1</sub> :0.077<br>FPR <sub>1→2</sub> :0.088<br>FPR <sub>2→3</sub> :0.143<br>FPR <sub>3→4</sub> :0.138<br>ScFPR:0.087 |
| 13b      | Siddiqui 2008 [14] | 2008 | USA         | English  | Liver clinic     | Clinical     | C-S/R             | 616      | 356       | LB                | METAVIR          | FPR <sub>0→1</sub> :0.076<br>FPR <sub>1→2</sub> :0.102<br>FPR <sub>2→3</sub> :0.153<br>FPR <sub>3→4</sub> :0.190<br>ScFPR:0.93  |
| 14       | Werner 2010 [38]   | 2010 | USA         | English  | Renal transplant | Clinical     | R-P               | 22       | 22        | LB                | Batts and Ludwig | FPR <sub>0→1</sub> :0.293<br>FPR <sub>1→2</sub> :0.230<br>FPR <sub>2→3</sub> :0.356<br>FPR <sub>3→4</sub> :0.336<br>ScFPR:0.277 |
| 15a      | Bochud 2009 [39]   | 2009 | Switzerland | English  | Liver clinic     | Clinical     | <sup>14</sup> R-P | 607      | 607       | LB                | METAVIR          | FPR <sub>0→1</sub> :0.094<br>FPR <sub>1→2</sub> :0.067<br>FPR <sub>2→3</sub> :0.073<br>FPR <sub>3→4</sub> :0.125<br>ScFPR:0.080 |
| 15b      | Bochud 2009 [39]   | 2009 | Switzerland | English  | Liver clinic     | Clinical     | R-P               | 90       | 90        | LB                | METAVIR          | FPR <sub>0→1</sub> :0.082<br>FPR <sub>1→2</sub> :0.84<br>FPR <sub>2→3</sub> :0.066<br>FPR <sub>3→4</sub> :0.082<br>ScFPR:0.077  |

## Supplementary Materials

| Supplementary Table 7 continued |                    |      |             |          |              |              |        |          |           |                   |                |                                                                                                                                  |
|---------------------------------|--------------------|------|-------------|----------|--------------|--------------|--------|----------|-----------|-------------------|----------------|----------------------------------------------------------------------------------------------------------------------------------|
| Study ID                        | Study              | Year | Country     | Language | Population   | Setting      | Design | Study SS | Biopsy SS | Assessment Method | Scoring system | Progression rates                                                                                                                |
| 15c                             | Bochud 2009 [39]   | 2009 | Switzerland | English  | Liver clinic | Clinical     | R-P    | 312      | 312       | LB                | METAVIR        | FPR <sub>0→1</sub> :0.115<br>FPR <sub>1→2</sub> :0.096<br>FPR <sub>2→3</sub> :0.080<br>FPR <sub>3→4</sub> :0.199<br>ScFPR: 0.101 |
| 15d                             | Bochud 2009 [39]   | 2009 | Switzerland | English  | Liver clinic | Clinical     | R-P    | 117      | 117       | LB                | METAVIR        | FPR <sub>0→1</sub> :0.081<br>FPR <sub>1→2</sub> :0.075<br>FPR <sub>2→3</sub> :0.080<br>FPR <sub>3→4</sub> :0.167<br>ScFPR: 0.079 |
| 16                              | Hissar 2009 [15]   | 2009 | India       | English  | Liver clinic | Clinical     | C-S/R  | 213      | 213       | LB                | Knodell        | FPR <sub>0→1</sub> :0.253<br>FPR <sub>1→2</sub> :0.166<br>FPR <sub>2→3</sub> :0.220<br>FPR <sub>3→4</sub> :0.160<br>ScFPR: 0.192 |
| 17                              | Kallwitz 2010 [16] | 2010 | USA         | English  | Liver clinic | Clinical     | C-S/R  | 812      | 812       | LB                | METAVIR        | FPR <sub>0→1</sub> :0.087<br>FPR <sub>1→2</sub> :0.162<br>FPR <sub>2→3</sub> :0.110<br>FPR <sub>3→4</sub> :0.111<br>ScFPR: 0.099 |
| 18                              | Kielland 2014 [40] | 2014 | Norway      | English  | IDU          | Non-clinical | R-P    | 61       | 61        | LB                | METAVIR        | FPR <sub>0→1</sub> :0.122<br>FPR <sub>1→2</sub> :0.022<br>FPR <sub>2→3</sub> :0.448<br>FPR <sub>3→4</sub> :0.270<br>ScFPR: 0.077 |
| 19a                             | Larsen 2010 [17]   | 2010 | France      | English  | IDU          | Non-clinical | C-S/R  | 1077     | 493       | LB                | METAVIR        | FPR <sub>0→1</sub> :0.166<br>FPR <sub>1→2</sub> :0.104<br>FPR <sub>2→3</sub> :0.154<br>FPR <sub>3→4</sub> :0.273<br>ScFPR: 0.133 |
| 19b                             | Larsen 2010 [17]   | 2010 | France      | English  | IDU          | Non-clinical | C-S/R  | 1986     | 1108      | LB                | METAVIR        | FPR <sub>0→1</sub> :0.138<br>FPR <sub>1→2</sub> :0.065<br>FPR <sub>2→3</sub> :0.106<br>FPR <sub>3→4</sub> :0.267<br>ScFPR: 0.101 |
| 20a                             | Lawson 2010 [41]   | 2010 | UK          | English  | Liver clinic | Clinical     | R-P    | 87       | 39        | LB                | Ishak          | FPR <sub>0→1</sub> :0.038<br>FPR <sub>1→2</sub> :0.066<br>FPR <sub>2→3</sub> :0.158<br>FPR <sub>3→4</sub> :0.380<br>ScFPR: 0.049 |
| 20b                             | Lawson 2010 [41]   | 2010 | UK          | English  | Liver clinic | Clinical     | R-P    | 1140     | 459       | LB                | Ishak          | FPR <sub>0→1</sub> :0.071<br>FPR <sub>1→2</sub> :0.152<br>FPR <sub>2→3</sub> :0.342<br>FPR <sub>3→4</sub> :0.198<br>ScFPR: 0.108 |

## Supplementary Materials

| Supplementary Table 7 continued |                               |      |                              |          |                     |          |        |          |           |                   |                |                                                                                                                                 |
|---------------------------------|-------------------------------|------|------------------------------|----------|---------------------|----------|--------|----------|-----------|-------------------|----------------|---------------------------------------------------------------------------------------------------------------------------------|
| Study ID                        | Study                         | Year | Country                      | Language | Population          | Setting  | Design | Study SS | Biopsy SS | Assessment Method | Scoring system | Progression rates                                                                                                               |
| 21                              | Marabita 2011 [20]            | 2011 | Italy                        | English  | Liver clinic        | Clinical | R-P    | 247      | 247       | LB                | Ishak          | FPR <sub>0→1</sub> :0.193<br>FPR <sub>1→2</sub> :0.062<br>FPR <sub>2→3</sub> :0.067<br>FPR <sub>3→4</sub> :0.076<br>ScFPR:0.088 |
| 22a                             | Patin 2012-French cohort [42] | 2012 | France                       | English  | Liver clinic        | Clinical | R-P    | 467      | 467       | LB                | METAVIR        | FPR <sub>0→1</sub> :0.121<br>FPR <sub>1→2</sub> :0.042<br>FPR <sub>2→3</sub> :0.530<br>FPR <sub>3→4</sub> :0.081<br>ScFPR:0.089 |
| 22b                             | Patin 2012-Swiss cohort [42]  | 2012 | Switzerland                  | English  | Liver clinic        | Clinical | R-P    | 694      | 614       | LB                | METAVIR        | FPR <sub>0→1</sub> :0.093<br>FPR <sub>1→2</sub> :0.067<br>FPR <sub>2→3</sub> :0.058<br>FPR <sub>3→4</sub> :0.905<br>ScFPR:0.081 |
| 22c                             | Patin 2012-US/France [42]     | 2012 | US/France                    | English  | Liver clinic        | Clinical | R-P    | 320      | 320       | LB                | METAVIR        | FPR <sub>0→1</sub> :0.088<br>FPR <sub>1→2</sub> :0.063<br>FPR <sub>2→3</sub> :0.099<br>FPR <sub>3→4</sub> :0.063<br>ScFPR:0.076 |
| 22d                             | Patin 2012-International [42] | 2012 | Australia/<br>Germany/<br>UK | English  | Liver clinic        | Clinical | R-P    | 642      | 642       | LB                | METAVIR        | FPR <sub>0→1</sub> :0.103<br>FPR <sub>1→2</sub> :0.076<br>FPR <sub>2→3</sub> :0.087<br>FPR <sub>3→4</sub> :0.139<br>ScFPR:0.091 |
| 22e                             | Patin 2012-Australian [42]    | 2012 | Australia                    | English  | Liver clinic        | Clinical | R-P    | 219      | 219       | LB                | METAVIR        | FPR <sub>0→1</sub> :0.140<br>FPR <sub>1→2</sub> :0.088<br>FPR <sub>2→3</sub> :0.077<br>FPR <sub>3→4</sub> :0.134<br>ScFPR:0.102 |
| 23                              | Brescini 2014                 | 2014 | Italy                        | English  | Infectious diseases | Clinical | C-S/R  | 186      | 186       | LSM               | METAVIR        | FPR <sub>0→1</sub> :0.192<br>FPR <sub>1→2</sub> :0.246<br>FPR <sub>2→3</sub> :0.421<br>FPR <sub>3→4</sub> :0.597<br>ScFPR:0.234 |
| 24                              | de Ledingham 2008 [4]         | 2008 | Spain                        | English  | Liver clinic        | Clinical | C-S/R  | 656      | 656       | LSM               | METAVIR        | FPR <sub>0→1</sub> :0.045<br>FPR <sub>1→2</sub> :0.051<br>FPR <sub>2→3</sub> :0.109<br>FPR <sub>3→4</sub> :0.157<br>ScFPR:0.053 |
| 25                              | Nunnari 2010 [5]              | 2010 | Italy                        | English  | Infectious diseases | Clinical | C-S/R  | 70       | 70        | LB                | METAVIR        | FPR <sub>0→1</sub> :0.157<br>FPR <sub>1→2</sub> :0.280<br>FPR <sub>2→3</sub> :0.174<br>FPR <sub>3→4</sub> :0.099<br>ScFPR:0.173 |

## Supplementary Materials

| Supplementary Table 7 continued |                           |      |           |          |                     |              |        |          |           |                    |                |                                                                                                                                 |
|---------------------------------|---------------------------|------|-----------|----------|---------------------|--------------|--------|----------|-----------|--------------------|----------------|---------------------------------------------------------------------------------------------------------------------------------|
| Study ID                        | Study                     | Year | Country   | Language | Population          | Setting      | Design | Study SS | Biopsy SS | Assessment Method  | Scoring system | Progression rates                                                                                                               |
| 26                              | Mazzocato 2014 [6]        | 2014 | Italy     | English  | Infectious diseases | Clinical     | C-S/R  | 115      | 115       | LSM                | METAVIR        | FPR <sub>0→1</sub> :0.172<br>FPR <sub>1→2</sub> :0.192<br>FPR <sub>2→3</sub> :0.658<br>FPR <sub>3→4</sub> :0.905<br>ScFPR:0.216 |
| 27                              | Suarez-Zarracina 2012 [7] | 2012 | Spain     | English  | Infectious diseases | Clinical     | C-S/R  | 68       | 68        | LSM                | METAVIR        | FPR <sub>0→1</sub> :0.079<br>FPR <sub>1→2</sub> :0.138<br>FPR <sub>2→3</sub> :0.124<br>FPR <sub>3→4</sub> :0.082<br>ScFPR:0.095 |
| 28                              | White 2012 [21]           | 2012 | USA       | English  | Liver clinic        | Clinical     | R-P    | 308      | 308       | FibroSURE-ActiTest | METAVIR        | FPR <sub>0→1</sub> :0.078<br>FPR <sub>1→2</sub> :0.103<br>FPR <sub>2→3</sub> :0.092<br>FPR <sub>3→4</sub> :0.069<br>ScFPR:0.078 |
| 29                              | Reggiardo 2012 [22]       | 2012 | Argentina | English  | Blood transfusion   | Non-clinical | R-P    | 40       | 40        | LB                 | METAVIR        | FPR <sub>0→1</sub> :0.075<br>FPR <sub>1→2</sub> :0.050<br>FPR <sub>2→3</sub> :0.128<br>FPR <sub>3→4</sub> :0.017<br>ScFPR:0.066 |
| 30                              | Liu 2014 [8]              | 2014 | China     | Chinese  | Blood transfusion   | Clinical     | C-S/R  | 96       | 52        | LSM                | METAVIR        | FPR <sub>0→1</sub> :0.106<br>FPR <sub>1→2</sub> :0.077<br>FPR <sub>2→3</sub> :0.154<br>FPR <sub>3→4</sub> :0.195<br>ScFPR:0.101 |
| 31a                             | Terrault 2008 [23]        | 2008 | USA       | English  | Liver clinic        | Clinical     | R-P    | 157      | 157       | LB                 | Ishak          | FPR <sub>0→1</sub> :0.099<br>FPR <sub>1→2</sub> :0.080<br>FPR <sub>2→3</sub> :0.093<br>FPR <sub>3→4</sub> :0.030<br>ScFPR:0.081 |
| 31b                             | Terrault 2008 [23]        | 2008 | USA       | English  | Liver clinic        | Clinical     | R-P    | 143      | 143       | LB                 | Ishak          | FPR <sub>0→1</sub> :0.100<br>FPR <sub>1→2</sub> :0.076<br>FPR <sub>2→3</sub> :0.076<br>FPR <sub>3→4</sub> :0.017<br>ScFPR:0.079 |
| 32                              | Guyader 2007 [24]         | 2007 | France    | English  | Liver clinic        | Clinical     | R-P    | 586      | 580       | LB                 | METAVIR        | FPR <sub>0→1</sub> :0.075<br>FPR <sub>1→2</sub> :0.085<br>FPR <sub>2→3</sub> :0.136<br>FPR <sub>3→4</sub> :0.221<br>ScFPR:0.085 |
| 33                              | Pradat 2007 [25]          | 2007 | France    | English  | Liver clinic        | Clinical     | R-P    | 247      | 247       | LB                 | METAVIR        | FPR <sub>0→1</sub> :0.237<br>FPR <sub>1→2</sub> :0.094<br>FPR <sub>2→3</sub> :0.149<br>FPR <sub>3→4</sub> :0.064<br>ScFPR:0.138 |

## Supplementary Materials

| Supplementary Table 7 continued |                      |      |         |          |                   |              |        |          |           |                   |                |                                                                                                                                  |
|---------------------------------|----------------------|------|---------|----------|-------------------|--------------|--------|----------|-----------|-------------------|----------------|----------------------------------------------------------------------------------------------------------------------------------|
| Study ID                        | Study                | Year | Country | Language | Population        | Setting      | Design | Study SS | Biopsy SS | Assessment Method | Scoring system | Progression rates                                                                                                                |
| 34a                             | Castera 2004 [26]    | 2004 | France  | English  | Liver clinic      | Clinical     | R-P    | 37       | 37        | LB                | METAVIR        | FPR <sub>0→1</sub> :0.116<br>FPR <sub>1→2</sub> :0.176<br>FPR <sub>2→3</sub> :0.110<br>FPR <sub>3→4</sub> :0.218<br>ScFPR:0.131  |
| 34b                             | Castera 2004 [26]    | 2004 | France  | English  | Liver clinic      | Clinical     | R-P    | 114      | 114       | LB                | METAVIR        | FPR <sub>0→1</sub> :0.080<br>FPR <sub>1→2</sub> :0.111<br>FPR <sub>2→3</sub> :0.084<br>FPR <sub>3→4</sub> :0.175<br>ScFPR:0.090  |
| 35a                             | Mathurin 1998 [27]   | 1998 | France  | English  | Liver clinic      | Clinical     | R-P    | 102      | 67        | LB                | METAVIR        | FPR <sub>0→1</sub> :0.081<br>FPR <sub>1→2</sub> :0.034<br>FPR <sub>2→3</sub> :0.108<br>FPR <sub>3→4</sub> :0.281<br>ScFPR:0.067  |
| 35b                             | Mathurin 1998 [27]   | 1998 | France  | English  | Liver clinic      | Clinical     | R-P    | 102      | 101       | LB                | METAVIR        | FPR <sub>0→1</sub> :0.200<br>FPR <sub>1→2</sub> :0.098<br>FPR <sub>2→3</sub> :0.077<br>FPR <sub>3→4</sub> :0.201<br>ScFPR:0.129  |
| 36                              | Bruden 2017[45]      | 2017 | USA     | English  | Community         | Non-clinical | R-P    | 407      | 407       | LB                | Ishak          | FPR <sub>0→1</sub> :0.091<br>FPR <sub>1→2</sub> :0.153<br>FPR <sub>2→3</sub> :0.088<br>FPR <sub>3→4</sub> :0.062<br>ScFPR:0.994  |
| 37                              | Cepeda 2016[28]      | 2016 | Indian  | English  | IDU               | Non-clinical | R-P    | 281      | 281       | LSM               | METAVIR        | FPR <sub>0→1</sub> :0.088<br>FPR <sub>1→2</sub> :0.138<br>FPR <sub>2→3</sub> :0.242<br>FPR <sub>3→4</sub> :0.225<br>ScFPR:0.118  |
| 38                              | Cepeda 2017[29]      | 2017 | USA     | English  | IDU               | Non-clinical | R-P    | 964      | 964       | LSM               | METAVIR        | FPR <sub>0→1</sub> :0.042<br>FPR <sub>1→2</sub> :0.053<br>FPR <sub>2→3</sub> :0.143<br>FPR <sub>3→4</sub> :0.113<br>ScFPR:0.053  |
| 39                              | Sakellariou 2014[34] | 2014 | Greece  | English  | Dialysis patients | Clinical     | R-P    | 61       | 58        | LB                | Ishak          | FPR <sub>0→1</sub> :0.322<br>FPR <sub>1→2</sub> :0.0822<br>FPR <sub>2→3</sub> :0.803<br>FPR <sub>3→4</sub> :0.449<br>ScFPR:0.238 |
| 40a                             | Lemos 2007 A[31]     | 2007 | Brazil  | English  | Dialysis patients | Clinical     | R-P    | 39       | 38        | LB                | Ludwig         | FPR <sub>0→1</sub> :0.092<br>FPR <sub>1→2</sub> :0.154<br>FPR <sub>2→3</sub> :0.116<br>FPR <sub>3→4</sub> :0.100<br>ScFPR:0.105  |

## Supplementary Materials

| Supplementary Table 7 continued |                       |      |               |          |                      |          |        |          |           |                   |                |                                                                                                                                 |
|---------------------------------|-----------------------|------|---------------|----------|----------------------|----------|--------|----------|-----------|-------------------|----------------|---------------------------------------------------------------------------------------------------------------------------------|
| Study ID                        | Study                 | Year | Country       | Language | Population           | Setting  | Design | Study SS | Biopsy SS | Assessment Method | Scoring system | Progression rates                                                                                                               |
| 40b                             | Lemos 2007 B[31]      | 2007 | Brazil        | English  | Dialysis patients    | Clinical | R-P    | 117      | 117       | LB                | Ludwig         | FPR <sub>0→1</sub> :0.145<br>FPR <sub>1→2</sub> :0.100<br>FPR <sub>2→3</sub> :0.485<br>FPR <sub>3→4</sub> :0.192<br>ScFPR:0.144 |
| 41                              | Delladetsima 2013[32] | 2013 | Greece        | English  | Renal transplant     | Clinical | R-P    | 23       | 29        | LB                | Ishak          | FPR <sub>0→1</sub> :0.220<br>FPR <sub>1→2</sub> :0.102<br>FPR <sub>2→3</sub> :0.504<br>FPR <sub>3→4</sub> :0.655<br>ScFPR:0.196 |
| 42                              | Besheer 2017[33]      | 2017 | Egypt         | English  | Liver clinic         | Clinical | R-P    | 122      | 122       | LB                | METAVIR        | FPR <sub>0→1</sub> :0.150<br>FPR <sub>1→2</sub> :0.136<br>FPR <sub>2→3</sub> :0.179<br>FPR <sub>3→4</sub> :0.127<br>ScFPR:0.135 |
| 43                              | Midgard 2017[43]      | 2017 | International | English  | Injection drug users | Clinical | R-P    | 93       | 122       | LB/LSM/APRI       | METAVIR        | FPR <sub>0→1</sub> :0.052<br>FPR <sub>1→2</sub> :0.058<br>FPR <sub>2→3</sub> :0.173<br>FPR <sub>3→4</sub> :0.121<br>ScFPR:0.062 |
| 44                              | Chen 2017[44]         | 2017 | Australia     | English  | Liver clinic         | Clinical | R-P    | 131      | 122       | LB                | METAVIR        | FPR <sub>0→1</sub> :0.068<br>FPR <sub>1→2</sub> :0.081<br>FPR <sub>2→3</sub> :0.150<br>FPR <sub>3→4</sub> :0.245<br>ScFPR:0.081 |
| 45                              | Valva 2014[9]         | 2014 | Argentina     | English  | Liver clinic         | Clinical | C-S/R  | 32       | 122       | LB                | METAVIR        | FPR <sub>0→1</sub> :0.093<br>FPR <sub>1→2</sub> :0.163<br>FPR <sub>2→3</sub> :0.092<br>FPR <sub>3→4</sub> :0.027<br>ScFPR:0.098 |
| Supplementary Table 7 continued |                       |      |               |          |                      |          |        |          |           |                   |                |                                                                                                                                 |

Supplementary Table 3. Table summarizing study characteristics for all 45 studies identified by the updated systematic review. Note: Of these, only studies with subjects that were HCV RNA positive were included in the meta-analysis (RNA data provided in S4 Table). *Abbreviations: HCV: Hepatitis C virus; C-S/R: cross-sectional/retrospective; R-P: retrospective-prospective; LB: liver biopsy; LSM: liver stiffness measurement; FPR: fibrosis progression rate; scFPR: stage-constant annual fibrosis progression rate (assuming constant progression over F0 to F4). Additional data form the original study (2008) by Thein et al is available though:*

<https://aasldpubs.onlinelibrary.wiley.com/action/downloadSupplement?doi=10.1002%2Fhep.22375&file=hep22375-SupplementaryAppendices.doc>

## Supplementary Materials

S4 Table: Table summarizing patient characteristics for the 45 identified studies

| Study ID | Study               | Age (yrs) | Gender (%Male) | DOI (yrs) | **Excess alcohol use (%) | HCV RNA+ (%) | HCV RNA load (log 10 IU/ml) | Genotype (%)                                    | Mode of Infection (%)             | BMI (kg/m <sup>2</sup> ) | HIV (%) | HBV (%) | METAVIR (%)                                                  | Mean ALT (IU/L) |
|----------|---------------------|-----------|----------------|-----------|--------------------------|--------------|-----------------------------|-------------------------------------------------|-----------------------------------|--------------------------|---------|---------|--------------------------------------------------------------|-----------------|
| 1        | Agostini 2007       | 42.4      | 62.86          | 12.00     | 11.41                    | 100.00       | .                           | GT1:.<br>GT2:.<br>GT3:.<br>GT4:.                | IDU: 65.8<br>BT: 14.4<br>SP: 19.8 | .                        | 10.36   | 0.00    | F0: 24.00<br>F1: 24.01<br>F2: 22.62<br>F3: 22.60<br>F4: 6.76 | .               |
| 2        | Allison 2012        | 43.1      | 50.81          | 25.00     | .                        | 100.00       | 3.32                        | GT1: 73.5<br>GT2: 16.8<br>GT3: 3.8<br>GT4: 1.1  | IDU: .<br>BT: .<br>SP: .          | 33.76                    | .       | .       | F0: 32.97<br>F1: 26.49<br>F2: 25.95<br>F3: 12.43<br>F4: 2.16 | 70.22           |
| 3        | Boonwaat 2010       | 34.0      | 76.28          | 15.00     | 46.05                    | 100.00       | .                           | GT1: 22.9<br>GT2: 6.7<br>GT3: 23.7<br>GT4: 3.0  | IDU: 62.0<br>BT: 24.9<br>SP: .    | .                        | 4.85    | 8.09    | F0: 28.10<br>F1: 28.76<br>F2: 19.61<br>F3: 18.95<br>F4: 4.58 | .               |
| 4        | Bourliere 2012      | 47.2      | 61.91          | 21.00     | 5.91                     | 100.00       | .                           | GT1: 52.1<br>GT2: 12.3<br>GT3: 24.9<br>GT4: 8.1 | IDU: 39.2<br>BT: 2.2<br>SP: .     | 24.40                    | 5.18    | 1.11    | F0: 8.36<br>F1: 25.08<br>F2: 31.72<br>F3: 17.78<br>F4: 17.06 | .               |
| 5        | Contreras 2007      | 43.5      | 46.88          | 10.32     | 35.94                    | .            | .                           | GT1:.<br>GT2:.<br>GT3:.<br>GT4:.                | IDU: 0.0<br>BT: 100<br>SP: 0.0    | .                        | .       | 0.00    | F0: 31.25<br>F1: 23.44<br>F2: 29.69<br>F3: 10.94<br>F4: 4.69 | 68.58           |
| 6        | Delgado-Borego 2010 | 14.8      | 51.00          | 12.00     | 0.00                     | 100.00       | .                           | GT1: 88.2<br>GT2: 3.9<br>GT3: 6.9<br>GT4: 1.0   | IDU: 2.0<br>BT: 4.0<br>SP: 15.0   | .                        | .       | .       | F0: 8.80<br>F1: 52.00<br>F2: 15.70<br>F3: 20.60<br>F4: 2.90  | .               |
| 7        | Forestier 2012      | 54.0      | 53.06          | 13.00     | .                        | 100.00       | 6.58                        | GT1: 84.7<br>GT2: 3.1<br>GT3: 9.2<br>GT4: 3.1   | IDU: .<br>BT: .<br>SP: .          | 26.00                    | .       | .       | F0: 6.67<br>F1: 33.3<br>F2: 31.11<br>F3: 13.33<br>F4: 15.56  | 59.00           |

## Supplementary Materials

| Study ID | Study         | Age (yrs) | Gender (%Male) | DOI (yrs) | **Excess alcohol use (%) | HCV RNA+ (%) | HCV RNA load (log 10 IU/ml) | Genotype (%)                                   | Mode of Infection (%)             | BMI (kg/m <sup>2</sup> ) | HIV (%) | HBV (%) | METAVIR (%)                                                   | Mean ALT (IU/L) |
|----------|---------------|-----------|----------------|-----------|--------------------------|--------------|-----------------------------|------------------------------------------------|-----------------------------------|--------------------------|---------|---------|---------------------------------------------------------------|-----------------|
| 8        | Goodman 2008  | 9.8       | 56.20          | 9.80      | 0.00                     | 100.00       | .                           | GT1: 82.6<br>GT2: 5.8<br>GT3: 10.7<br>GT4: .   | IDU: 0.0<br>BT: 7.4<br>SP: 14.9   | 20.3                     | 0.00    | 0.00    | F0: 14.05<br>F1: 45.45<br>F2: 34.71<br>F3: 4.13<br>F4: 1.65   | .               |
| 9        | Hui 2007      | 53.7      | 82.93          | 38.00     | .                        | 100.00       | 5.81                        | GT1: 37.8<br>GT2: 7.3<br>GT3: 6.1<br>GT4: .    | IDU: 43.9<br>BT: 34.2<br>SP: 22.0 | 27.94                    | 0.00    | 0.00    | F0: 28.30<br>F1: 30.19<br>F2: 13.21<br>F3: 13.21<br>F4: 15.09 | 33.49           |
| 10a      | Liu 2014 – M  | 43.9      | 77.50          | 14.69     | 27.45                    | 100.00       | 2.70                        | GT1: 81.2<br>GT2: 4.0<br>GT3: 14.9<br>GT4: 0.0 | IDU: 74.0<br>BT: .<br>SP: .       | .                        | 8.85    | .       | F0: 11.9<br>F1: 22.8<br>F2: 38.60<br>F3: 15.80<br>F4: 10.90   | 90.30           |
| 10b      | Liu 2014 - M  | 46.7      | 67.60          | 18.01     | 11.64                    | 100.00       | 2.31                        | GT1: 67.3<br>GT2: 9.5<br>GT3: 14.5<br>GT4: 6.2 | IDU: 53.1<br>BT: .<br>SP: .       | .                        | 1.09    | .       | F0: 7.30<br>F1: 26.9<br>F2: 37.8<br>F3: 6.40<br>F4: 11.60     | 98.00           |
| 11       | Nanda 2012    | 59.0      | 0.00           | 30.00     | .                        | 100.00       | .                           | GT1: 100<br>GT2: 0.0<br>GT3: 0.0<br>GT4: 0.0   | IDU: .<br>BT: 0.0<br>SP: .        | 25.30                    | .       | .       | F0: 50.00<br>F1: 25.00<br>F2: 10.00<br>F3: 5.00<br>F4: 10.00  | .               |
| 12       | Rao 2012      | 53.7      | 44.83          | 25.20     | 21.26                    | 100.00       | 6.22                        | GT1: 75.6<br>GT2: 11.2<br>GT3: .<br>GT4: .     | IDU: 0.0<br>BT: 100<br>SP: 0.0    | .                        | 0.00    | 1.44    | F0: 25.71<br>F1: 25.14<br>F2: 17.71<br>F3: 14.29<br>F4: 17.14 | 45.80           |
| 13a      | Siddiqui 2008 | 50.0      | 56.61          | 22.50     | .                        | 84.00        | .                           | GT1: 57.5<br>GT2: 3.2<br>GT3: 0.9<br>GT4: 0.4  | IDU: 52.6<br>BT: 14.2<br>SP: 20.3 | .                        | .       | 2.80    | F0: 17.74<br>F1: 27.16<br>F2: 17.84<br>F3: 15.66<br>F4: 21.61 | 66.00           |
| 13b      | Siddiqui 2008 | 45.3      | 60.55          | 22.50     | .                        | 82.00        | .                           | GT1: 42.5<br>GT2: 6.5<br>GT3: 9.9<br>GT4: 1.3  | IDU: 45.3<br>BT: 16.9<br>SP: 25.3 | .                        | .       | 3.41    | F0: 18.26<br>F1: 23.31<br>F2: 17.42<br>F3: 13.20<br>F4: 27.81 | 77.00           |

Supplementary Table 8 continued



## Supplementary Materials

| Study ID | Study         | Age (yrs) | Gender (%Male) | DOI (yrs) | **Excess alcohol use (%) | HCV RNA+ (%) | HCV RNA load (log 10 IU/ml) | Genotype (%)                                    | Mode of Infection (%)          | BMI (kg/m <sup>2</sup> ) | HIV (%) | HBV (%) | METAVIR (%)                                                   | Mean ALT (IU/L) |
|----------|---------------|-----------|----------------|-----------|--------------------------|--------------|-----------------------------|-------------------------------------------------|--------------------------------|--------------------------|---------|---------|---------------------------------------------------------------|-----------------|
| 14       | Werner 2010   | 49.1      | 72.73          | 4.43      | .                        | 100.00       | 6.12                        | GT1: 72.7<br>GT2: 13.6<br>GT3: 13.6<br>GT4: 0.0 | IDU: .<br>BT: .<br>SP: .       | .                        | .       | .       | F0: 27.27<br>F1: 40.91<br>F2: 18.18<br>F3: 9.09<br>F4: 4.55   | .               |
| 15a      | Bochud 2009   | 42.0      | 60.00          | 21.00     | 55.02                    | 100.00       | 6.00                        | GT1: 100<br>GT2: 0.0<br>GT3: 0.0<br>GT4: 0.0    | IDU: 49.0<br>BT: 22.0<br>SP: . | 23.90                    | 7.00    | 0.00    | F0: 14.0<br>F1: 37.0<br>F2: 27.0<br>F3: 11.0<br>F4: 11.0      | 66.00           |
| 15b      | Bochud 2009   | 54.0      | 48.00          | 24.00     | 37.78                    | 100.00       | 5.93                        | GT1: 0.0<br>GT2: 100<br>GT3: 0.0<br>GT4: 0.0    | IDU: 11.0<br>BT: 53.0<br>SP: . | 24.90                    | 2.00    | 0.00    | F0: 14.00<br>F1: 27.00<br>F2: 31.00<br>F3: 16.00<br>F4: 12.00 | 45.00           |
| 15c      | Bochud 2009   | 40.0      | 65.00          | 20.00     | 63.14                    | 100.00       | 5.90                        | GT1: 0.0<br>GT2: 0.0<br>GT3: 100<br>GT4: 0.0    | IDU: 66.0<br>BT: 9.0<br>SP: .  | 23.30                    | 7.00    | 0.00    | F0: 10.00<br>F1: 28.00<br>F2: 32.00<br>F3: 11.00<br>F4: 19.00 | 76.00           |
| 15d      | Bochud 2009   | 41.0      | 66.00          | 22.00     | 56.41                    | 100.00       | 5.80                        | GT1: 0.0<br>GT2: 0.0<br>GT3: 0.0<br>GT4: 100    | IDU: 60.0<br>BT: 11.0<br>SP: . | 23.70                    | 7.00    | 0.00    | F0: 17.00<br>F1: 32.00<br>F2: 26.00<br>F3: 10.00<br>F4: 15.00 | 63.00           |
| 16       | Hissar 2009   | 41.6      | 65.26          | 12.10     | 0.00                     | 100.00       | 4.80                        | GT1: 11.7<br>GT2: .<br>GT3: 49.3<br>GT4: 4.7    | IDU: 0.5<br>BT: 76.1<br>SP: .  | .                        | 0.00    | 0.00    | F0: 4.69<br>F1: 25.35<br>F2: 23.94<br>F3: 24.88<br>F4: 21.13  | 118.50          |
| 17       | Kallwitz 2010 | 49.6      | 61.00          | 26.50     | .                        | 100.00       | .                           | GT1: .<br>GT2: .<br>GT3: .<br>GT4: .            | IDU: 36.5<br>BT: 33.5<br>SP: . | 30.10                    | 0.00    | 0.00    | F0: 10.0<br>F1: 10.0<br>F2: 22.50<br>F3: 22.50<br>F4: 35.00   | .               |
| 18       | Kielland 2014 | 37.3      | 74.5           | 17.75     | .                        | 100.00       | .                           | GT1: .<br>GT2: .<br>GT3: .<br>GT4: .            | IDU: 100<br>BT: 0.0<br>SP: 0.0 | .                        | 0.98    | 4.90    | F0: 11.48<br>F1: 68.85<br>F2: 3.28<br>F3: 4.92<br>F4: 11.48   | .               |

Supplementary Table 8 continued

## Supplementary Materials

| Study ID | Study                  | Age (yrs) | Gender (%Male) | DOI (yrs) | **Excess alcohol use (%) | HCV RNA+ (%) | HCV RNA load (log 10 IU/ml) | Genotype (%)                                    | Mode of Infection (%)          | BMI (kg/m <sup>2</sup> ) | HIV (%) | HBV (%) | METAVIR (%)                                                   | Mean ALT (IU/L) |
|----------|------------------------|-----------|----------------|-----------|--------------------------|--------------|-----------------------------|-------------------------------------------------|--------------------------------|--------------------------|---------|---------|---------------------------------------------------------------|-----------------|
| 19a      | Larsen 2010            | 39.0      | 75.00          | 18.00     | 42.62                    | 100.00       | .                           | GT1: 0.0<br>GT2: 0.0<br>GT3: 100<br>GT4: 0.0    | IDU: .<br>BT: .<br>SP: .       | .                        | 4.36    | 1.95    | F0: 6.31<br>F1: 34.34<br>F2: 28.28<br>F3: 15.66<br>F4: 15.40  | .               |
| 19b      | Larsen 2010            | 40.0      | 75.00          | 19.00     | 43.61                    | 100.00       | .                           | GT1: 77.5<br>GT2: 5.9<br>GT3: 0.0<br>GT4: 16.4  | IDU: .<br>BT: .<br>SP: .       | .                        | 7.05    | 2.06    | F0: 8.30<br>F1: 46.62<br>F2: 27.05<br>F3: 9.63<br>F4: 8.40    | .               |
| 20a      | Lawson 2010            | 36.0      | 47.00          | 14.00     | 35.63                    | 100.00       | .                           | GT1: 29.9<br>GT2: 8.1<br>GT3: 26.4<br>GT4: .    | IDU: 74.7<br>BT: 12.6<br>SP: . | 22.70                    | 0.00    | 0.00    | F0: 58.32<br>F1: 25.35<br>F2: 7.61<br>F3: 2.54<br>F4: 5.07    | .               |
| 20b      | Lawson 2010            | 36.0      | 71.00          | 14.00     | 40.44                    | 100.00       | .                           | GT1: 30.9<br>GT2: 6.1<br>GT3: 33.8<br>GT4: .    | IDU: 65.4<br>BT: 11.4<br>SP: . | 25.00                    | 0.00    | 3.16    | F0: 37.02<br>F1: 22.01<br>F2: 10.01<br>F3: 13.95<br>F4: 17.00 | .               |
| 21       | Marabita 2011          | 47.0      | 52.23          | 25.00     | 0.00                     | 100.00       | .                           | GT1: 52.2<br>GT2: 30.0<br>GT3: 13.8<br>GT4: 4.1 | IDU: 23.5<br>BT: 74.9<br>SP: . | 25.30                    | 0.00    | 0.00    | F0: 0.81<br>F1: 30.36<br>F2: 32.39<br>F3: 20.24<br>F4: 16.19  | .               |
| 22a      | Patin 2012-French coh. | 48.2      | 44.75          | 20.17     | 14.56                    | .            | .                           | GT1: 63.0<br>GT2: 8.8<br>GT3: 16.1<br>GT4: 2.1  | IDU: 33.6<br>BT: 43.9<br>SP: . | .                        | 0.00    | 0.00    | F0: 8.78<br>F1: 52.25<br>F2: 4.28<br>F3: 19.91<br>F4: 14.78   | .               |
| 22b      | Patin 2012-Swiss coh.  | 43.6      | 62.39          | 22.39     | 19.02                    | .            | .                           | GT1: 52.2<br>GT2: 9.7<br>GT3: 27.8<br>GT4: 6.8  | IDU: 41.8<br>BT: 19.2<br>SP: . | .                        | 0.00    | 0.00    | F0: 12.54<br>F1: 35.34<br>F2: 31.27<br>F3: 0.98<br>F4: 19.87  | .               |
| 22c      | Patin 2012-US/France   | 48.0      | 60.31          | 23.48     | 11.88                    | 100.00       | .                           | GT1: 67.2<br>GT2: 5.3<br>GT3: 16.9<br>GT4: 4.4  | IDU: 7.8<br>BT: 4.7<br>SP: .   | .                        | 0.00    | 0.00    | F0: 12.81<br>F1: 35.63<br>F2: 21.88<br>F3: 19.06<br>F4: 10.63 | .               |

Supplementary Table 8 continued

## Supplementary Materials

| Study ID | Study                    | Age (yrs) | Gender (%Male) | DOI (yrs) | **Excess alcohol use (%) | HCV RNA+ (%) | HCV RNA load (log 10 IU/ml) | Genotype (%)                                    | Mode of Infection (%)            | BMI (kg/m <sup>2</sup> ) | HIV (%) | HBV (%) | METAVIR (%)                                                   | Mean ALT (IU/L) |
|----------|--------------------------|-----------|----------------|-----------|--------------------------|--------------|-----------------------------|-------------------------------------------------|----------------------------------|--------------------------|---------|---------|---------------------------------------------------------------|-----------------|
| 22d      | Patin 2012-International | 45.8      | 40.65          | 16.96     | .                        | 100.00       | .                           | GT1:.<br>GT2:.<br>GT3:.<br>GT4:.                | IDU: 20.6<br>BT: 5.1<br>SP: .    | .                        | 0.00    | 0.00    | F0: 17.45<br>F1: 38.47<br>F2: 25.23<br>F3: 10.12<br>F4: 8.72  | .               |
| 22e      | Patin 2012-Australian    | 62.4      | 70.78          | 20.20     | .                        | 100.00       | .                           | GT1: 100<br>GT2: 0.0<br>GT3: 0.0<br>GT4: 0.0    | IDU: 0<br>BT: 0<br>SP: .         | .                        | 0.00    | 0.00    | F0: 5.94<br>F1: 29.68<br>F2: 33.33<br>F3: 14.61<br>F4: 16.44  | .               |
| 23       | Brescini 2014            | 45.0      | 62.37          | 6.25      | 15.05                    | .            | 5.76                        | GT1: 48.9<br>GT2: 12.4<br>GT3: 24.7<br>GT4: 4.3 | IDU: 47.9<br>BT: .<br>SP: .      | .                        | 0.00    | 0.00    | F0: 30.11<br>F1: 30.65<br>F2: 16.13<br>F3: 9.14<br>F4: 13.98  | 58.00           |
| 24       | de Ledinghen 2008        | 52.8      | 38.41          | 23.50     | 0.00                     | 100.00       | 5.83                        | GT1: 60.4<br>GT2: 20.1<br>GT3: 8.8<br>GT4: 9.5  | IDU: 16.0<br>BT: 33.8<br>SP: .   | .                        | 0.00    | 0.00    | F0: 34.60<br>F1: 34.45<br>F2: 13.41<br>F3: 7.16<br>F4: 10.37  | 59.00           |
| 25       | Nunnari 2010             | 52.5      | 57.14          | 12.40     | .                        | 100.00       | 2.80                        | GT1: 71.4<br>GT2: 14.3<br>GT3: 14.3<br>GT4: 0.0 | IDU: .<br>BT: .<br>SP: .         | .                        | 0.00    | 0.00    | F0: 14.29<br>F1: 14.29<br>F2: 28.57<br>F3: 28.57<br>F4: 14.29 | 97.40           |
| 26       | Mazzocato 2014           | 48.0      | 58.26          | 6.00      | 18.26                    | .            | .                           | GT1: 38.3<br>GT2: 18.3<br>GT3: 13.9<br>GT4: 2.6 | IDU: 32.2<br>BT: .<br>SP: .      | .                        | 0.00    | 0.00    | F0: 35.65<br>F1: 34.78<br>F2: 9.57<br>F3: 4.35<br>F4: 15.65   | 56.00           |
| 27       | Suarez-Zarracina 2012    | 46.5      | 61.76          | 23.00     | 64.71                    | 100.00       | 5.87                        | GT1: 82.4<br>GT2: 1.5<br>GT3: 11.8<br>GT4: 2.9  | IDU: 48.5<br>BT: 50.0<br>SP: 0.0 | .                        | 0.00    | 0.00    | F0: 16.18<br>F1: 16.18<br>F2: 22.06<br>F3: 25.00<br>F4: 20.59 | 85.50           |
| 28       | White 2012               | 57.0      | 100.00         | 34.00     | 34.09                    | 99.35        | 6.35                        | GT1: 85.7<br>GT2: 8.4<br>GT3: 4.5<br>GT4: 0.6   | IDU: 50.7<br>BT: 17.5<br>SP: .   | .                        | 0.00    | 0.00    | F0: 7.14<br>F1: 12.66<br>F2: 21.43<br>F3: 26.95<br>F4: 31.82  | .               |

Supplementary Table 8 continued

## Supplementary Materials

| Study ID | Study          | Age (yrs) | Gender (%Male) | DOI (yrs) | **Excess alcohol use (%) | HCV RNA+ (%) | HCV RNA load (log 10 IU/ml) | Genotype (%)                                    | Mode of Infection (%)             | BMI (kg/m <sup>2</sup> ) | HIV (%) | HBV (%) | METAVIR (%)                                                  | Mean ALT (IU/L) |
|----------|----------------|-----------|----------------|-----------|--------------------------|--------------|-----------------------------|-------------------------------------------------|-----------------------------------|--------------------------|---------|---------|--------------------------------------------------------------|-----------------|
| 29       | Reggiardo 2012 | 52.5      | 37.50          | 21.50     | 32.50                    | 100          | .                           | GT1: 50.0<br>GT2: 37.5<br>GT3: 12.5<br>GT4: 0.0 | IDU: 0.0<br>BT: 100<br>SP: 0.0    | .                        | 0.00    | 0.00    | F0: 20.00<br>F1: 42.50<br>F2: 15.00<br>F3: 20.00<br>F4: 2.50 | .               |
| 30       | Liu 2014       | 33.6      | 43.75          | 10.22     | .                        | .            | 6.22                        | GT1: 69.8<br>GT2: .<br>GT3: .<br>GT4: .         | IDU: 0.0<br>BT: 100<br>SP: 0.0    | .                        | .       | 1.04    | F0: 33.65<br>F1: 42.31<br>F2: 13.46<br>F3: 5.77<br>F4: 3.85  | 116.00          |
| 31a      | Terrault 2008  | 46.6      | 64.33          | 25.50     | 0.00                     | 100.00       | .                           | GT1: 100<br>GT2: 0.0<br>GT3: 0.0<br>GT4: 0.0    | IDU: 61.8<br>BT: 26.8<br>SP: 0.0  | .                        | 0.00    | 0.00    | F0: 8.00<br>F1: 26.00<br>F2: 25.50<br>F3: 31.00<br>F4: 9.00  | 110.40          |
| 31b      | Terrault 2008  | 47.9      | 66.43          | 24.00     | 0.00                     | 100.00       | .                           | GT1: 100<br>GT2: 0.0<br>GT3: 0.0<br>GT4: 0.0    | IDU: 57.3<br>BT: 23.1<br>SP: 0.0  | .                        | 0.00    | 0.00    | F0: 9.00<br>F1: 29.50<br>F2: 29.50<br>F3: 28.00<br>F4: 4.00  | 66.00           |
| 32       | Guyader 2007   | 41.6      | 58.00          | 16.00     | 36.00                    | 100.00       | .                           | GT1: 39.5<br>GT2: 6.8<br>GT3: 15.0<br>GT4: .    | IDU: 33.0<br>BT: 34.0<br>SP: 33.0 | 23.00                    | 0.00    | 0.00    | F0: 30.00<br>F1: 33.00<br>F2: 17.00<br>F3: 8.00<br>F4: 11.00 | .               |
| 33       | Pradat 2007    | 39.5      | 63.97          | 14.50     | 15.38                    | 100.00       | .                           | GT1: 35.6<br>GT2: .<br>GT3: .<br>GT4: .         | IDU: .<br>BT: .<br>SP: .          | .                        | .       | .       | F0: 3.24<br>F1: 37.25<br>F2: 25.10<br>F3: 25.51<br>F4: 8.91  | .               |
| 34a      | Castera 2004   | 34.4      | 83.78          | 12.10     | .                        | 100.00       | 9.30                        | GT1: 0.0<br>GT2: 0.0<br>GT3: 100<br>GT4: 0.0    | IDU: 65.0<br>BT: 16.0<br>SP: 19.0 | 18.10                    | 0.00    | 0.00    | F0: 24.50<br>F1: 24.50<br>F2: 30.0<br>F3: 10.50<br>F4: 10.50 | 118.00          |
| 34b      | Castera 2004   | 45.7      | 70.18          | 15.60     | .                        | 100.00       | 6.10                        | GT1: 78.9<br>GT2: 15.0<br>GT3: 0.0<br>GT4: 3.1  | IDU: 14.0<br>BT: 41.0<br>SP: 45.0 | 32.90                    | 0.00    | 0.00    | F0: 28.50<br>F1: 28.50<br>F2: 26.0<br>F3: 8.50<br>F4: 8.50   | 143.00          |

Supplementary Table 8 continued

## Supplementary Materials

| Study ID | Study             | Age (yrs) | Gender (%Male) | DOI (yrs) | **Excess alcohol use (%) | HCV RNA+ (%) | HCV RNA load (log 10 IU/ml) | Genotype (%)                                     | Mode of Infection (%)             | BMI (kg/m <sup>2</sup> ) | HIV (%) | HBV (%) | METAVIR (%)                                                   | Mean ALT (IU/L) |
|----------|-------------------|-----------|----------------|-----------|--------------------------|--------------|-----------------------------|--------------------------------------------------|-----------------------------------|--------------------------|---------|---------|---------------------------------------------------------------|-----------------|
| 35a      | Mathurin 1998     | 43.0      | 40.20          | 14.90     | 10.78                    | 65.00        | .                           | GT1: 43.1<br>GT2: 7.8<br>GT3: 4.9<br>GT4: 1.0    | IDU: 32.0<br>BT: 35.0<br>SP: .    | .                        | 0.00    | 0.00    | F0: 29.85<br>F1: 52.24<br>F2: 10.45<br>F3: 2.99<br>F4: 4.48   | 24.50           |
| 35b      | Mathurin 1998     | 44.0      | 40.20          | 14.10     | 10.78                    | 80.00        | .                           | GT1: 45.1<br>GT2: 4.9<br>GT3: 11.8<br>GT4: 3.9   | IDU: 31.0<br>BT: 40.0<br>SP: .    | .                        | 0.00    | 0.00    | F0: 5.94<br>F1: 37.62<br>F2: 35.64<br>F3: 9.00<br>F4: 10.89   | 140.00          |
| 36       | Bruden, 2017      | 41.2      | 4864           | 18.60     | 8.85                     | 100.00       | .                           | GT1:68.80<br>GT2:14.74<br>GT3:13.27<br>GT4: 0.41 | IDU: 58.7<br>BT: 14.0<br>SP: 27.3 | .                        | 0.00    | 0.00    | F0: 18.43<br>F1: 18.42<br>F2: 32.19<br>F3: 21.62<br>F4: 9.34  | .               |
| 37       | Cepeda, 2016      | 41.6      | 100.00         | 16.90     | 67.97                    | 100.00       | .                           | GT1:.<br>GT2:.<br>GT3:.<br>GT4:.                 | IDU: 100<br>BT: 0.0<br>SP: 0.0    | 19.80                    | 30.25   | 4.62    | F0: 22.42<br>F1: 22.78<br>F2: 14.23<br>F3: 14.23<br>F4: 26.33 | 49.00           |
| 38       | Cepeda, 2017      | 49.0      | 71.58          | 27.50     | 26.21                    | 100.00       | 6.40                        | GT1:.<br>GT2:.<br>GT3:.<br>GT4:.                 | IDU: 100<br>BT: 0.0<br>SP: 0.0    | .                        | 34.96   | .       | F0: 31.33<br>F1: 31.33<br>F2: 11.31<br>F3: 11.31<br>F4: 14.73 | .               |
| 39       | Sakellariou, 2014 | 45.7      | 60.66          | 4.20      | 0.00                     | 100.00       | 5.06                        | GT1: 27.9<br>GT2: 1.6<br>GT3: 23.0<br>GT4: 14.8  | IDU: .<br>BT: .<br>SP: .          | .                        | 0.00    | 0.00    | F0: 25.86<br>F1: 60.34<br>F2: 5.17<br>F3: 5.17<br>F4: 3.45    | .               |
| 40a      | Lemos, 2007 A     | 57.0      | 64.10          | 22.00     | 0.00                     | 100.00       | .                           | GT1:.<br>GT2:.<br>GT3:.<br>GT4:.                 | IDU: 0.0<br>BT: 69.2<br>SP: 0.0   | .                        | 0.00    | 0.00    | F0: 12.82<br>F1: 14.10<br>F2: 24.36<br>F3: 23.08<br>F4: 23.10 | .               |
| 40b      | Lemos, 2007 B     | 45.0      | 62.39          | 6.00      | 0.00                     | 100.00       | .                           | GT1:.<br>GT2:.<br>GT3:.<br>GT4:.                 | IDU: 0.0<br>BT: 25.6<br>SP: 0.0   | .                        | 0.00    | 0.00    | F0: 41.88<br>F1: 41.88<br>F2: 6.84<br>F3: 6.84<br>F4: 2.6     | .               |

## Supplementary Materials

| Supplementary Table 8 continued |                    |           |                |           |                          |              |                             |                                                 |                                   |                          |         |         |                                                               |                 |
|---------------------------------|--------------------|-----------|----------------|-----------|--------------------------|--------------|-----------------------------|-------------------------------------------------|-----------------------------------|--------------------------|---------|---------|---------------------------------------------------------------|-----------------|
| Study ID                        | Study              | Age (yrs) | Gender (%Male) | DOI (yrs) | **Excess alcohol use (%) | HCV RNA+ (%) | HCV RNA load (log 10 IU/ml) | Genotype (%)                                    | Mode of Infection (%)             | BMI (kg/m <sup>2</sup> ) | HIV (%) | HBV (%) | METAVIR (%)                                                   | Mean ALT (IU/L) |
| 41                              | Delladetsima, 2013 | 42.7      | 60.87          | 4.40      | .                        | 87.00        | 3.50                        | GT1: 47.8<br>GT2: 0.0<br>GT3: 26.1<br>GT4: 13.0 | IDU: .<br>BT: .<br>SP: .          | .                        | .       | .       | F0: 47.83<br>F1: 60.87<br>F2: 8.70<br>F3: 4.35<br>F4: 4.35    | .               |
| 42                              | Besheer, 2017      | 49.5      | 63.11          | 19.00     | .                        | 100.00       | 5.79                        | GT1: .<br>GT2: .<br>GT3: .<br>GT4: .            | IDU: .<br>BT: .<br>SP: .          | .                        | .       | .       | F0: 5.73<br>F1: 18.85<br>F2: 19.67<br>F3: 25.41<br>F4: 30.33  | 55.50           |
| 43                              | Midgard, 2017      | 41.0      | 82.80          | 21.00     | 16.13                    | 100.00       | .                           | GT1: .<br>GT2: .<br>GT3: .<br>GT4: .            | IDU: 100<br>BT: 0.0<br>SP: 0.0    | .                        | 0.00    | 0.00    | F0: 33.33<br>F1: 34.41<br>F2: 10.75<br>F3: 10.75<br>F4: 10.75 | .               |
| 44                              | Chen, 2017         | 37.0      | 69.47          | 17.00     | .                        | 100.00       | 6.10                        | GT1: .<br>GT2: .<br>GT3: .<br>GT4: .            | IDU: 31.3<br>BT: 16.8<br>SP: 18.3 | 25.20                    | 0.00    | 0.00    | F0: 31.30<br>F1: 32.82<br>F2: 15.27<br>F3: 7.63<br>F4: 12.98  | 94.00           |
| 45                              | Valva, 2014        | 51.0      | 65.63          | 20.00     | .                        | 100.00       | 5.74                        | GT1: .<br>GT2: .<br>GT3: .<br>GT4: .            | IDU: 21.9<br>BT: 12.5<br>SP: 62.5 | .                        | 0.00    | 0.00    | F0: 15.63<br>F1: 15.63<br>F2: 31.25<br>F3: 31.25<br>F4: 6.25  | 67.00           |

Supplementary Table 8 continued

Supplementary Table 4. Table summarizing patient characteristics for all 45 studies identified by the updated systematic review. Note: Of these, only studies with subjects that were HCV RNA positive were included in the meta-analysis. *Abbreviations: HCV: Hepatitis C virus; DOI: duration of infection; ALT: alanine aminotransferase; BMI: body mass index; HIV: human immunodeficiency virus; HBV: hepatitis B virus; GT: genotype BT: blood transfusion; IDU: intravenous drug use; SP: sporadic risk. Additional data form the original study (2008) by Thein et al is available though: <https://aasldpubs.onlinelibrary.wiley.com/action/downloadSupplement?doi=10.1002%2Fhep.22375&file=hep22375-SupplementaryAppendices.doc>*

**S5 Table: Summary of subgroups excluded from the meta-analysis**

|                                        | All Groups |        | Original Groups |        | New Groups |        |
|----------------------------------------|------------|--------|-----------------|--------|------------|--------|
|                                        | N          | SS     | N               | SS     | N          | SS     |
| <b>All groups</b>                      | 40         | 15,117 | 30              | 7,629  | 10         | 7,488  |
| <b>Study Setting</b>                   |            |        |                 |        |            |        |
| Clinical                               | 35         | 9,772  | 27              | 6,426  | 8          | 3,346  |
| Non-Clinical                           | 5          | 5,345  | 3               | 1,203  | 2          | 4,142  |
| <b>Study Design</b>                    |            |        |                 |        |            |        |
| Cross-sectional/Retrospective          | 32         | 10,258 | 28              | 7,447  | 4          | 2,811  |
| Retrospective-Prospective              | 8          | 4,859  | 2               | 182    | 6          | 4,677  |
| <b>Study population</b>                |            |        |                 |        |            |        |
| Females                                | .          | .      | .               | .      | .          | .      |
| Blood donors                           | 1          | 348    | .               | .      | 1          | 348    |
| Post-transfusion                       | 2          | 161    | 1               | 65     | 1          | 96     |
| Liver Clinic                           | 23         | 9,659  | 18              | 6,496  | 5          | 3,163  |
| Injection drug users                   | 2          | 432    | 2               | 432    | .          | .      |
| Community                              | 2          | 3,866  | 1               | 72     | 1          | 3,794  |
| Pediatric patients                     | 4          | 374    | 4               | 374    | .          | .      |
| Renal transplant recipients            | 2          | 68     | 1               | 45     | 1          | 23     |
| Dialysis patients                      | 4          | 209    | 3               | 145    | 1          | 64     |
| Infectious diseases                    | .          | .      | .               | .      | .          | .      |
| <b>Publication year</b>                |            |        |                 |        |            |        |
| <2000                                  | 8          | 2,749  | 6               | 2,545  | 2          | 204    |
| 2000 to <2005                          | 19         | 4,037  | 19              | 4,037  | .          | .      |
| 2005 to <2010                          | 9          | 7,556  | 5               | 1,047  | 4          | 6,509  |
| ≥2010                                  | 4          | 775    | 0               | .      | 4          | 775    |
| <b>Age at assessment</b>               |            |        |                 |        |            |        |
| Age<40                                 | 32         | 6,435  | 22              | 3,096  | 10         | 3,339  |
| Age≥ 40                                | 136        | 51,119 | 89              | 30,025 | 47         | 21,094 |
| <b>Age at infection</b>                |            |        |                 |        |            |        |
| <20 years                              | 16         | 2,757  | 9               | 1,101  | 7          | 1,656  |
| 30 to <40 years                        | 113        | 41,987 | 77              | 24,254 | 36         | 17,733 |
| 20 to <30 years                        | 33         | 12,225 | 25              | 7,766  | 8          | 4,459  |
| ≥40 years                              | 6          | 585    | 0               | .      | 6          | 585    |
| <b>Estimated duration of infection</b> |            |        |                 |        |            |        |
| <10 years                              | 14         | 1,244  | 7               | 599    | 7          | 645    |
| 10 to <20 years                        | 94         | 31,836 | 69              | 19,660 | 25         | 12,176 |
| ≥ 20 years                             | 60         | 24,474 | 35              | 12,862 | 25         | 11,612 |
| <b>Viral Genotype</b>                  |            |        |                 |        |            |        |
| Genotype 1                             | 10         | 3,000  | 5               | 1,854  | 5          | 1,146  |
| Genotype 2                             | 1          | 90     | 0               | .      | 1          | 90     |
| Genotype 3                             | 3          | 1,426  | 0               | .      | 3          | 1,426  |
| Genotype 4                             | 1          | 117    | 0               | .      | 1          | 117    |

Supplemental Table 5. Summary of subgroups excluded from the meta-analysis. 40 study groups (30 from the original review and 10 update) were excluded from the meta-analysis due to incomplete or missing assessment of RNA status for all study subjects. *Abbreviations: N: number of groups included in the meta-analysis; SS: total sample size in each group.; CHC: chronic hepatitis C.*

## Supplementary Materials

S6 Table: Summary of clinical characteristics of study subjects stratified by review update

|                                               | Updated Review<br>(1990-2018) |      |      | Original Review<br>(1990-2007) |      |      | New Groups<br>(2007-2018) |      |      |
|-----------------------------------------------|-------------------------------|------|------|--------------------------------|------|------|---------------------------|------|------|
|                                               | N                             | Mean | SE   | N                              | Mean | SE   | N                         | Mean | SE   |
| <b>Sample size</b>                            | 131                           | 326  | 35.9 | 81                             | 315  | 43.4 | 50                        | 344  | 63.1 |
| <b>Male (%)</b>                               | 131                           | 62.0 | 1.5  | 81                             | 62.1 | 2.0  | 50                        | 61.9 | 2.1  |
| <b>Age at assessment (yrs.)</b>               | 131                           | 44.3 | 0.6  | 81                             | 44.3 | 0.5  | 50                        | 44.4 | 1.3  |
| <b>Estimated age at infection (yrs.)</b>      | 131                           | 25.8 | 0.5  | 81                             | 25.8 | 0.4  | 50                        | 25.8 | 1.3  |
| <b>Estimated duration of infection (yrs.)</b> | 131                           | 18.4 | 0.5  | 81                             | 18.5 | 0.5  | 50                        | 18.2 | 1.0  |
| <b>Cirrhosis (%)</b>                          | 131                           | 12.0 | 0.7  | 81                             | 11.3 | 0.8  | 50                        | 13.2 | 1.2  |
| <b>Steatosis (%)</b>                          | 39                            | 50.3 | 3.9  | 21                             | 48.9 | 4.4  | 18                        | 52   | 6.8  |
| <b>BMI (kg/m<sup>2</sup>)</b>                 | 49                            | 25.7 | 0.4  | 30                             | 26.1 | 0.4  | 19                        | 25   | 0.9  |
| <b>HIV (%)</b>                                | 106                           | 2.0  | 0.7  | 63                             | 1.5  | 0.8  | 43                        | 2.8  | 1.1  |
| <b>HBV (HBsAg positive, %)</b>                | 104                           | 0.4  | 0.1  | 64                             | 0.3  | 0.1  | 40                        | 0.6  | 0.3  |
| <b>Elevated ALT (%)</b>                       | 52                            | 76.2 | 4.0  | 37                             | 80.8 | 4.0  | 15                        | 65   | 9.2  |
| <b>ALT (IU/L)</b>                             | 58                            | 87.5 | 4.3  | 35                             | 94.3 | 5.9  | 23                        | 77.3 | 5.7  |
| <b>Excess alcohol use (%)</b>                 | 102                           | 19.9 | 2.1  | 67                             | 18.1 | 2.5  | 35                        | 23.2 | 3.7  |
| <b>Mode of infection</b>                      |                               |      |      |                                |      |      |                           |      |      |
| IDU (%)                                       | 110                           | 43.4 | 2.5  | 68                             | 43   | 2.8  | 42                        | 44.1 | 5.0  |
| BT (%)                                        | 107                           | 25.7 | 2.0  | 68                             | 27.1 | 2.1  | 39                        | 23.4 | 4.0  |
| Sporadic (%)                                  | 90                            | 22.4 | 2.0  | 68                             | 25.4 | 2.3  | 22                        | 13.2 | 3.8  |
| <b>HCV RNA load (log<sub>10</sub>IU/mL)</b>   | 49                            | 5.8  | 0.2  | 27                             | 6.1  | 0.2  | 22                        | 5.5  | 0.3  |
| <b>Genotype</b>                               |                               |      |      |                                |      |      |                           |      |      |
| Genotype 1 (%)                                | 113                           | 56.2 | 2.4  | 71                             | 57.2 | 2.4  | 42                        | 54.5 | 4.9  |
| Genotype 2 (%)                                | 89                            | 9.5  | 1.3  | 49                             | 8.7  | 0.9  | 40                        | 10.4 | 2.6  |
| Genotype 3 (%)                                | 95                            | 17.6 | 2.0  | 54                             | 15   | 1.3  | 41                        | 21.1 | 4.3  |
| Genotype 4 (%)                                | 70                            | 4.6  | 1.5  | 34                             | 3.4  | 0.7  | 36                        | 5.7  | 2.8  |
| <b>Racial groups</b>                          |                               |      |      |                                |      |      |                           |      |      |
| White (%)                                     | 68                            | 68.6 | 4.3  | 34                             | 67.2 | 5.2  | 34                        | 70   | 6.9  |
| Black (%)                                     | 54                            | 13.4 | 3.4  | 30                             | 15.7 | 4.4  | 24                        | 10.5 | 5.5  |
| Asian (%)                                     | 47                            | 5.4  | 3.0  | 24                             | 5.7  | 4.1  | 23                        | 5.1  | 4.3  |

Supplementary Table 6. Summary of clinical characteristics of study subjects included in the meta-analysis stratified by review update. Meta-analysis was restricted to study groups where all subjects were confirmed by HCV RNA testing (N=131). Abbreviations: BMI: body mass index; ALT: alanine aminotransferase; IDU: injection drug use; BT: blood transfusion; HCV: hepatitis C virus; HIV: human immunodeficiency virus; HBV: hepatitis B virus; HBsAg: hepatitis B surface antigen; RNA: ribonucleic acid; N: number of groups in meta-analysis reporting parameter; SE: standard error.



## Supplementary Materials

S7 Table: Hepatic fibrosis progression rates stratified by review update

|                                  | Updated Review<br>(1990-2018) |       |       |       |                | Original Review<br>(1990-2007) |       |       |       |                |
|----------------------------------|-------------------------------|-------|-------|-------|----------------|--------------------------------|-------|-------|-------|----------------|
|                                  | N                             | Mean  | 95%CI |       | I <sup>2</sup> | N                              | Mean  | 95%CI |       | I <sup>2</sup> |
| <b>[1] All identified groups</b> |                               |       |       |       |                |                                |       |       |       |                |
| F0 → F1                          | 171                           | 0.112 | 0.103 | 0.122 | 98%            | 111                            | 0.117 | 0.104 | 0.130 | 98%            |
| F1 → F2                          | 171                           | 0.088 | 0.080 | 0.097 | 98%            | 111                            | 0.085 | 0.075 | 0.096 | 98%            |
| F2 → F3                          | 171                           | 0.123 | 0.113 | 0.133 | 94%            | 111                            | 0.120 | 0.109 | 0.133 | 91%            |
| F3 → F4                          | 171                           | 0.120 | 0.108 | 0.132 | 89%            | 111                            | 0.116 | 0.104 | 0.129 | 83%            |
| scFPR                            | 171                           | 0.099 | 0.093 | 0.104 | 85%            | 111                            | 0.103 | 0.098 | 0.108 | 85%            |
| <b>[2] HCV RNA+ groups</b>       |                               |       |       |       |                |                                |       |       |       |                |
| F0 → F1                          | 131                           | 0.107 | 0.097 | 0.118 | 98%            | 81                             | 0.108 | 0.095 | 0.123 | 98%            |
| F1 → F2                          | 131                           | 0.082 | 0.074 | 0.091 | 97%            | 81                             | 0.076 | 0.066 | 0.087 | 98%            |
| F2 → F3                          | 131                           | 0.117 | 0.107 | 0.129 | 94%            | 81                             | 0.111 | 0.099 | 0.124 | 89%            |
| F3 → F4                          | 131                           | 0.116 | 0.104 | 0.131 | 89%            | 81                             | 0.111 | 0.098 | 0.125 | 83%            |
| scFPR                            | 131                           | 0.094 | 0.088 | 0.100 | 85%            | 81                             | 0.091 | 0.084 | 0.098 | 83%            |

Supplementary Table 7. Annual stage-specific and stage-constant fibrosis progression rates based on random effect meta-analyses of [1] all identified study groups meeting inclusion/exclusion criteria (N=171); or [2] subset of identified groups where CHC was confirmed by HCV RNA testing in all subjects (N=131) stratified by review update. Hepatic fibrosis stages were based on METAVIR fibrosis scoring system. *Abbreviations: CHC: chronic hepatitis C; scFPR: stage-constant annual fibrosis progression rate (assuming constant progression over F0 to F4); I<sup>2</sup>: indicates the percentage of variability in estimates due to heterogeneity vs. sampling error; N: number of groups included in the meta-analyses.*

Supplementary Materials

S2 Figure: Forrest plot for fibrosis progression rate from F0 to F1

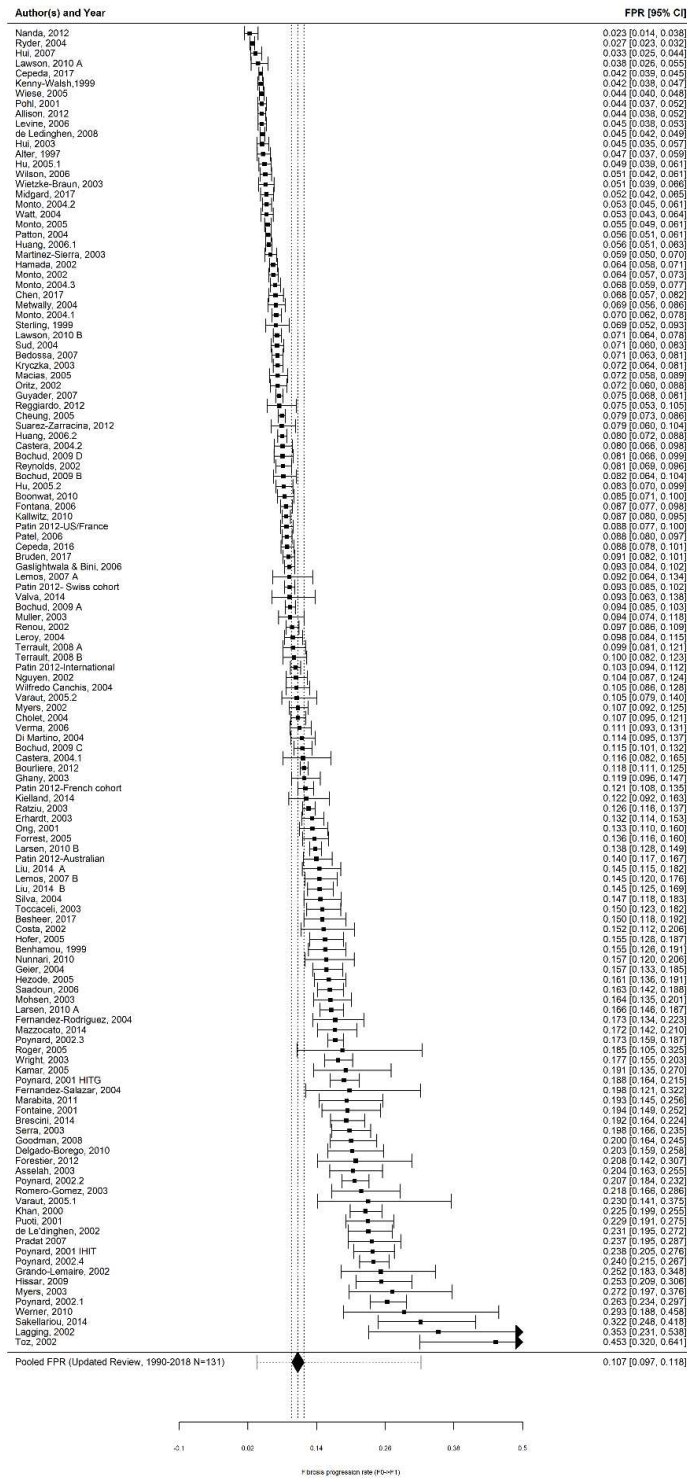

Supplementary Materials

S3 Figure: Forrest plot for fibrosis progression rate from F1 to F2

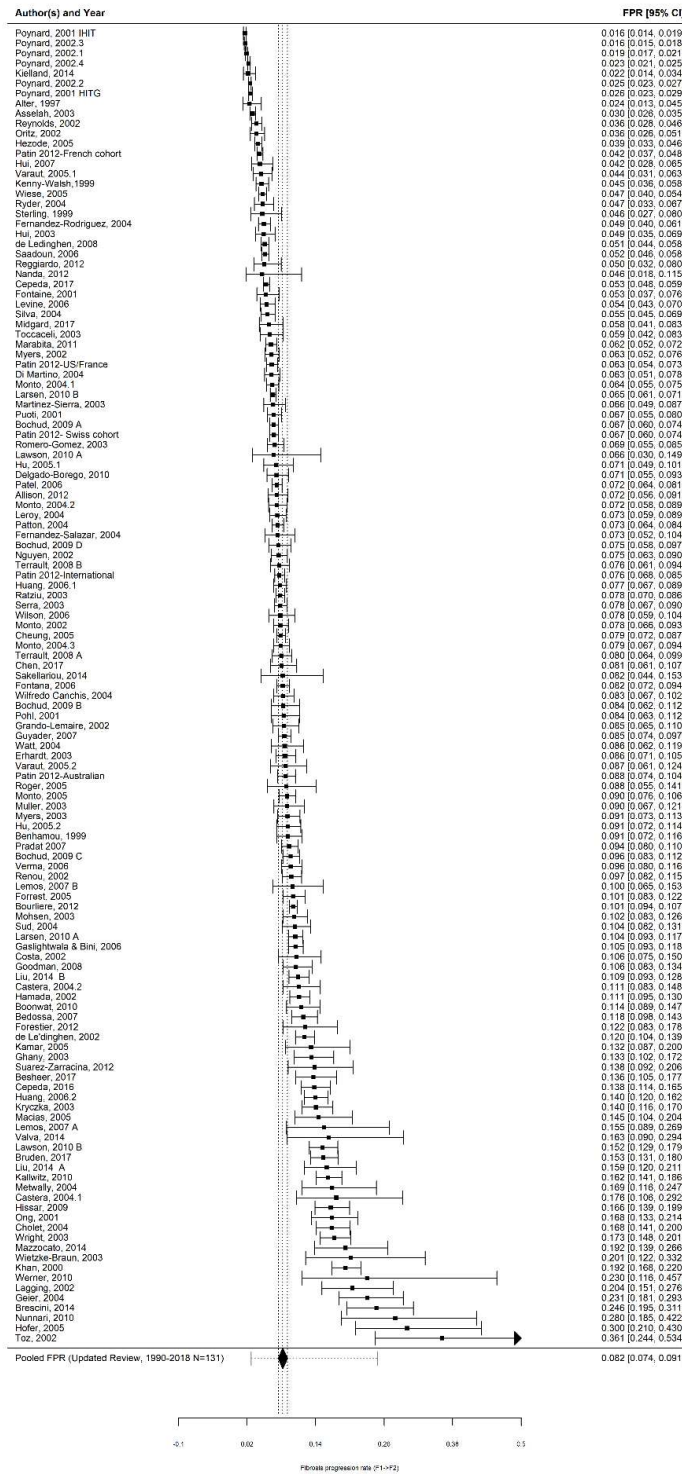

Supplementary Materials

S4 Figure: Forrest plot for fibrosis progression rate from F2 to F3

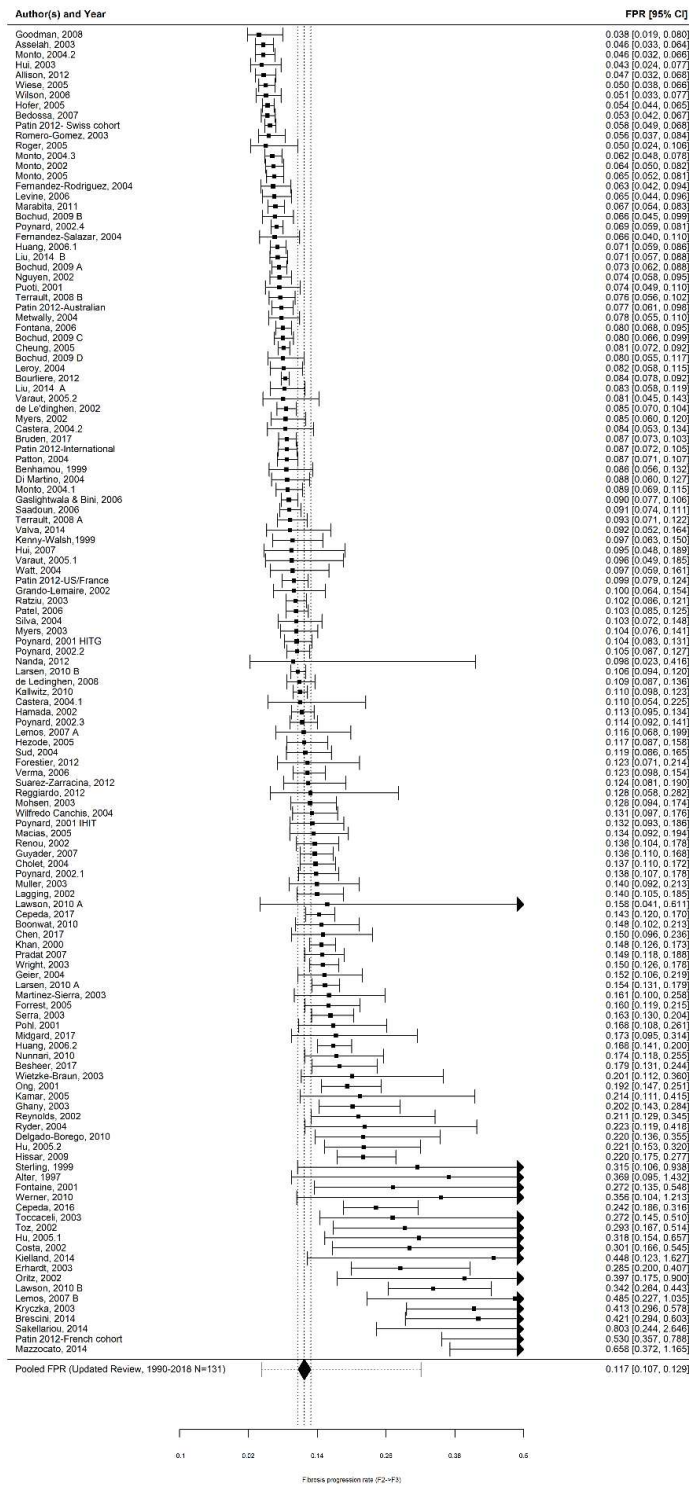

Supplementary Materials

S5 Figure: Forrest plot for fibrosis progression rate from F3 to F4

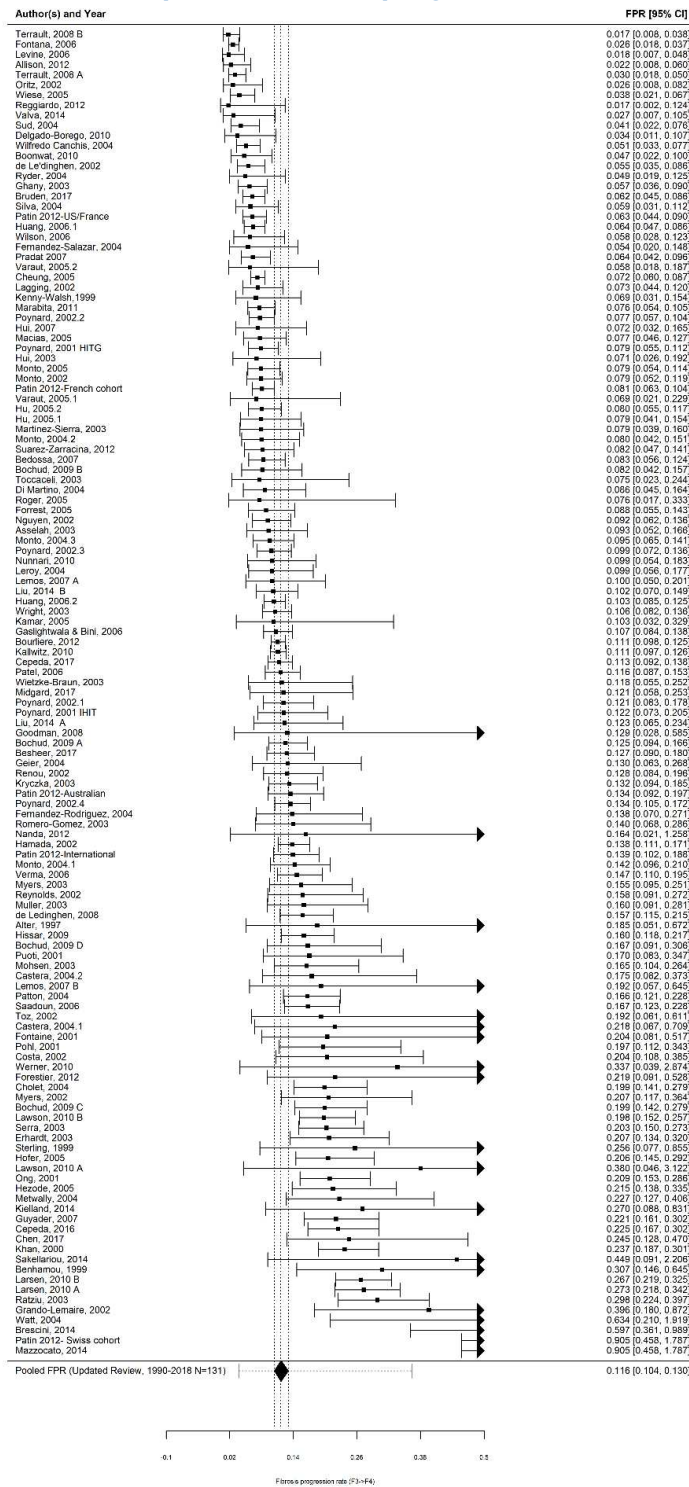

## Supplementary Materials

S8 Table: Covariate-adjusted hepatic fibrosis progression rates for CHC subgroups

|                               | F0 → F1 |        |       | F1 → F2 |        |       | F2 → F3 |        |       | F3 → F4 |        |       | scFPR |        |       | TTC*<br>(yrs) |
|-------------------------------|---------|--------|-------|---------|--------|-------|---------|--------|-------|---------|--------|-------|-------|--------|-------|---------------|
|                               | Mean    | 95% CI |       | Mean    | 95% CI |       | Mean    | 95% CI |       | Mean    | 95% CI |       | Mean  | 95% CI |       |               |
| <b>All groups</b>             | 0.107   | 0.099  | 0.115 | 0.082   | 0.075  | 0.090 | 0.119   | 0.110  | 0.129 | 0.116   | 0.105  | 0.129 | 0.096 | 0.092  | 0.100 | 38            |
| <b>Study design</b>           |         |        |       |         |        |       |         |        |       |         |        |       |       |        |       |               |
| Cross-sectional/Retrospective | 0.110   | 0.100  | 0.122 | 0.081   | 0.072  | 0.092 | 0.119   | 0.107  | 0.132 | 0.115   | 0.100  | 0.132 | 0.096 | 0.091  | 0.101 | 39            |
| Retrospective-Prospective     | 0.101   | 0.086  | 0.118 | 0.084   | 0.069  | 0.103 | 0.119   | 0.100  | 0.141 | 0.120   | 0.097  | 0.148 | 0.097 | 0.089  | 0.105 | 39            |
| <b>Study population**</b>     |         |        |       |         |        |       |         |        |       |         |        |       |       |        |       |               |
| Females                       | 0.063   | 0.039  | 0.103 | 0.073   | 0.040  | 0.136 | 0.115   | 0.067  | 0.199 | 0.071   | 0.035  | 0.144 | 0.076 | 0.058  | 0.100 | 52            |
| Blood donors                  | 0.102   | 0.059  | 0.176 | 0.060   | 0.030  | 0.120 | 0.088   | 0.047  | 0.166 | 0.059   | 0.025  | 0.138 | 0.081 | 0.058  | 0.114 | 55            |
| Pediatric patients            | 0.233   | 0.119  | 0.459 | 0.094   | 0.041  | 0.218 | 0.114   | 0.051  | 0.254 | 0.080   | 0.023  | 0.283 | 0.151 | 0.093  | 0.245 | 36            |
| Post transfusion              | 0.131   | 0.056  | 0.305 | 0.085   | 0.030  | 0.247 | 0.125   | 0.046  | 0.341 | 0.062   | 0.015  | 0.247 | 0.116 | 0.066  | 0.204 | 44            |
| Liver clinic                  | 0.106   | 0.096  | 0.117 | 0.083   | 0.073  | 0.095 | 0.116   | 0.104  | 0.129 | 0.119   | 0.104  | 0.136 | 0.096 | 0.091  | 0.100 | 38            |
| Injection drug users          | 0.125   | 0.079  | 0.197 | 0.053   | 0.030  | 0.094 | 0.116   | 0.069  | 0.193 | 0.206   | 0.111  | 0.380 | 0.095 | 0.076  | 0.120 | 40            |
| Community                     | 0.133   | 0.085  | 0.207 | 0.098   | 0.057  | 0.171 | 0.118   | 0.076  | 0.183 | 0.145   | 0.086  | 0.242 | 0.109 | 0.091  | 0.130 | 33            |
| Dialysis patients             | 0.094   | 0.061  | 0.144 | 0.048   | 0.028  | 0.083 | 0.156   | 0.090  | 0.271 | 0.108   | 0.056  | 0.209 | 0.076 | 0.056  | 0.103 | 47            |
| Renal transplant              | 0.105   | 0.063  | 0.174 | 0.108   | 0.057  | 0.203 | 0.124   | 0.067  | 0.228 | 0.082   | 0.034  | 0.202 | 0.112 | 0.076  | 0.164 | 39            |
| Infectious diseases           | 0.082   | 0.049  | 0.137 | 0.114   | 0.059  | 0.219 | 0.151   | 0.086  | 0.266 | 0.147   | 0.075  | 0.291 | 0.095 | 0.071  | 0.126 | 34            |
| <b>Publication year</b>       |         |        |       |         |        |       |         |        |       |         |        |       |       |        |       |               |
| <2000                         | 0.070   | 0.042  | 0.117 | 0.064   | 0.034  | 0.123 | 0.112   | 0.059  | 0.213 | 0.199   | 0.091  | 0.437 | 0.073 | 0.052  | 0.101 | 44            |
| 2000 to <2005                 | 0.106   | 0.092  | 0.121 | 0.073   | 0.061  | 0.086 | 0.112   | 0.097  | 0.129 | 0.115   | 0.096  | 0.137 | 0.091 | 0.085  | 0.097 | 41            |
| 2005 to <2010                 | 0.115   | 0.099  | 0.135 | 0.092   | 0.076  | 0.112 | 0.112   | 0.095  | 0.131 | 0.110   | 0.090  | 0.134 | 0.100 | 0.092  | 0.107 | 38            |
| ≥2010                         | 0.105   | 0.087  | 0.127 | 0.092   | 0.073  | 0.116 | 0.141   | 0.116  | 0.172 | 0.120   | 0.093  | 0.153 | 0.104 | 0.095  | 0.114 | 36            |
| <b>HCV genotype</b>           |         |        |       |         |        |       |         |        |       |         |        |       |       |        |       |               |
| Genotype-1                    | 0.127   | 0.104  | 0.155 | 0.069   | 0.054  | 0.089 | 0.098   | 0.080  | 0.121 | 0.098   | 0.076  | 0.126 | 0.093 | 0.084  | 0.102 | 43            |
| Genotype non-1                | 0.082   | 0.062  | 0.108 | 0.102   | 0.071  | 0.144 | 0.160   | 0.120  | 0.215 | 0.139   | 0.097  | 0.199 | 0.099 | 0.086  | 0.113 | 35            |
| Genotype-3                    | 0.099   | 0.064  | 0.153 | 0.105   | 0.061  | 0.183 | 0.128   | 0.081  | 0.204 | 0.164   | 0.094  | 0.286 | 0.106 | 0.086  | 0.130 | 34            |
| Genotype non-3                | 0.103   | 0.090  | 0.117 | 0.082   | 0.070  | 0.096 | 0.124   | 0.108  | 0.143 | 0.113   | 0.095  | 0.133 | 0.095 | 0.089  | 0.101 | 39            |
| <b>Race</b>                   |         |        |       |         |        |       |         |        |       |         |        |       |       |        |       |               |
| White                         | 0.117   | 0.099  | 0.138 | 0.076   | 0.062  | 0.093 | 0.107   | 0.090  | 0.127 | 0.120   | 0.097  | 0.149 | 0.094 | 0.087  | 0.103 | 39            |
| Black                         | 0.074   | 0.044  | 0.122 | 0.110   | 0.059  | 0.207 | 0.146   | 0.086  | 0.248 | 0.062   | 0.032  | 0.122 | 0.096 | 0.075  | 0.123 | 46            |
| Asian                         | 0.109   | 0.052  | 0.227 | 0.103   | 0.041  | 0.261 | 0.148   | 0.062  | 0.353 | 0.295   | 0.098  | 0.891 | 0.107 | 0.067  | 0.172 | 29            |

Supplementary Table 8. Annual fibrosis progression rates adjusted for study design, population, publication year, age at HCV infection (mean: 26), duration of infection (mean: 17.6), male gender (mean: 62%), infection by IDU (mean: 43%), infection by blood transfusion (mean: 26%), excess alcohol consumption (mean: 18%), HIV positivity (mean: 2%), genotype-1 (mean: 56%), genotype-3 (mean: 17%) and race (69% White; 13% Black and 5% Asian) except the following groups: † pediatric subgroup was adjusted for age at infection at 1.4 and duration of infection at 11 years; †† female subgroup was not adjusted by the mean gender (male gender: 0%); and \*post-transfusion cohort was adjusted for the mode of infection by IDU at 0% and blood transfusion at 100%; IDU cohort was adjusted for the mode of infection by IDU at 100% and blood transfusion at 0%. *Abbreviations: scFPR: stage-constant annual fibrosis progression rate (assuming constant progression over F0 to F4); \*TTC: time-to-cirrhosis (based on adjusted stage-specific annual progression rates); CHC: chronic hepatitis C; HCV: hepatitis C virus; IDU: Injection drug use.*



## Supplementary Materials

S9 Table: Univariate random effects meta-regression of covariates associated with fibrosis progression

| Predictors                                    | F0→F1* |       |                |             | F1→F2*  |       |                |             | F2→F3* |       |                |             | F3→F4* |       |                |             | scFPR* |       |                |             |
|-----------------------------------------------|--------|-------|----------------|-------------|---------|-------|----------------|-------------|--------|-------|----------------|-------------|--------|-------|----------------|-------------|--------|-------|----------------|-------------|
|                                               | β      | SE    | P-value        | RR          | β       | SE    | P-value        | RR          | β      | SE    | P-value        | RR          | β      | SE    | P-value        | RR          | β      | SE    | P-value        | RR          |
| <b>Study setting</b>                          |        |       |                |             |         |       |                |             |        |       |                |             |        |       |                |             |        |       |                |             |
| Clinical (ref)                                |        |       |                | 1.00        |         |       |                | 1.00        |        |       |                | 1.00        |        |       |                | 1.00        |        |       |                | 1.00        |
| Non-clinical                                  | -0.383 | 0.132 | <b>0.004</b>   | <b>0.68</b> | -0.287  | 0.137 | <b>0.039</b>   | <b>0.75</b> | -0.055 | 0.134 | 0.683          | 0.95        | -0.128 | 0.162 | 0.432          | 0.88        | -0.221 | 0.085 | <b>0.011</b>   | <b>0.80</b> |
| <b>Study design</b>                           |        |       |                |             |         |       |                |             |        |       |                |             |        |       |                |             |        |       |                |             |
| Cross-sectional/Retrospective (ref)           |        |       |                | 1.00        |         |       |                | 1.00        |        |       |                | 1.00        |        |       |                | 1.00        |        |       |                | 1.00        |
| Retrospective-Prospective                     | -0.206 | 0.105 | 0.051          | 0.81        | -0.004  | 0.109 | 0.970          | 1.00        | -0.057 | 0.104 | 0.585          | 0.94        | -0.078 | 0.125 | 0.531          | 0.92        | -0.102 | 0.066 | 0.128          | 0.90        |
| <b>Study population</b>                       |        |       |                |             |         |       |                |             |        |       |                |             |        |       |                |             |        |       |                |             |
| Liver clinic (ref)                            |        |       |                | 1.00        |         |       |                | 1.00        |        |       |                | 1.00        |        |       |                | 1.00        |        |       |                | 1.00        |
| Females                                       | -0.798 | 0.240 | <b>0.001</b>   | <b>0.45</b> | -0.467  | 0.252 | 0.067          | 0.63        | -0.408 | 0.245 | 0.098          | 0.67        | -0.779 | 0.313 | <b>0.014</b>   | <b>0.46</b> | -0.561 | 0.158 | <b>0.001</b>   | <b>0.57</b> |
| Blood donors                                  | -0.458 | 0.304 | 0.135          | 0.63        | -0.520  | 0.322 | 0.109          | 0.59        | -0.209 | 0.329 | 0.526          | 0.81        | -0.685 | 0.411 | 0.098          | 0.50        | -0.355 | 0.214 | 0.099          | 0.70        |
| Pediatric patients                            | 0.642  | 0.371 | 0.086          | 1.90        | 0.064   | 0.379 | 0.866          | 1.07        | -0.076 | 0.395 | 0.848          | 0.93        | -0.643 | 0.598 | 0.284          | 0.53        | 0.365  | 0.283 | 0.199          | 1.44        |
| Post-transfusion                              | -0.429 | 0.373 | 0.253          | 0.65        | -0.055  | 0.387 | 0.887          | 0.95        | 0.066  | 0.376 | 0.861          | 1.07        | -0.162 | 0.478 | 0.735          | 0.85        | -0.171 | 0.242 | 0.480          | 0.84        |
| Injecting drug users                          | 0.026  | 0.172 | 0.881          | 1.03        | -0.145  | 0.177 | 0.413          | 0.87        | 0.092  | 0.170 | 0.590          | 1.10        | 0.543  | 0.197 | <b>0.007</b>   | <b>1.72</b> | 0.020  | 0.103 | 0.849          | 1.02        |
| Community                                     | 0.235  | 0.262 | 0.372          | 1.26        | 0.073   | 0.266 | 0.785          | 1.08        | 0.011  | 0.242 | 0.963          | 1.01        | 0.170  | 0.274 | 0.537          | 1.18        | 0.122  | 0.142 | 0.390          | 1.13        |
| Dialysis patients                             | 0.132  | 0.224 | 0.557          | 1.14        | -0.088  | 0.239 | 0.714          | 0.92        | 0.774  | 0.257 | <b>0.003</b>   | <b>2.17</b> | 0.150  | 0.307 | 0.627          | 1.16        | 0.099  | 0.175 | 0.571          | 1.10        |
| Renal transplant recipients                   | 0.752  | 0.275 | <b>0.007</b>   | <b>2.12</b> | 0.751   | 0.289 | <b>0.010</b>   | <b>2.12</b> | 0.541  | 0.300 | 0.073          | 1.72        | 0.076  | 0.428 | 0.859          | 1.08        | 0.699  | 0.222 | <b>0.002</b>   | <b>2.01</b> |
| Infectious diseases                           | 0.301  | 0.266 | 0.259          | 1.35        | 0.934   | 0.278 | <b>0.001</b>   | <b>2.54</b> | 0.895  | 0.261 | <b>0.001</b>   | <b>2.45</b> | 0.814  | 0.302 | <b>0.008</b>   | <b>2.26</b> | 0.618  | 0.166 | < <b>0.001</b> | <b>1.86</b> |
| <b>Publication year</b>                       |        |       |                |             |         |       |                |             |        |       |                |             |        |       |                |             |        |       |                |             |
| <2000 (ref)                                   |        |       |                | 1.00        |         |       |                | 1.00        |        |       |                | 1.00        |        |       |                | 1.00        |        |       |                | 1.00        |
| 2000 to <2005                                 | 0.562  | 0.290 | 0.055          | 1.75        | 0.453   | 0.305 | 0.139          | 1.57        | -0.180 | 0.33  | 0.582          | 0.84        | -0.357 | 0.385 | 0.355          | 0.70        | 0.328  | 0.213 | 0.126          | 1.39        |
| 2005 to <2010                                 | 0.352  | 0.295 | 0.234          | 1.42        | 0.568   | 0.309 | 0.069          | 1.76        | -0.327 | 0.330 | 0.323          | 0.72        | -0.630 | 0.389 | 0.108          | 0.53        | 0.238  | 0.216 | 0.272          | 1.27        |
| ≥2010                                         | 0.453  | 0.296 | 0.128          | 1.57        | 0.687   | 0.311 | <b>0.029</b>   | <b>1.99</b> | 0.015  | 0.332 | 0.965          | 1.01        | -0.227 | 0.392 | 0.563          | 0.80        | 0.398  | 0.217 | 0.069          | 1.49        |
| <b>Gender – male†</b>                         | 0.518  | 0.290 | 0.076          | 1.68        | 0.519   | 0.297 | 0.083          | 1.68        | 0.092  | 0.289 | 0.751          | 1.10        | 0.549  | 0.352 | 0.121          | 1.73        | 0.340  | 0.186 | 0.069          | 1.41        |
| <b>Age at assessment (yrs.)</b>               | -0.026 | 0.007 | <b>0.001</b>   | <b>0.97</b> | -0.0003 | 0.008 | 0.967          | 1.00        | -0.012 | 0.007 | 0.103          | 0.99        | -0.019 | 0.010 | <b>0.050</b>   | <b>0.98</b> | -0.017 | 0.005 | <b>0.001</b>   | <b>0.98</b> |
| <b>Estimated Age at infection (yrs.)</b>      | 0.023  | 0.008 | <b>0.005</b>   | <b>1.02</b> | 0.029   | 0.008 | < <b>0.001</b> | <b>1.03</b> | 0.035  | 0.008 | < <b>0.001</b> | <b>1.04</b> | 0.027  | 0.010 | <b>0.009</b>   | <b>1.03</b> | 0.026  | 0.005 | < <b>0.001</b> | <b>1.03</b> |
| <b>Estimated Duration of infection (yrs.)</b> | -0.065 | 0.007 | < <b>0.001</b> | <b>0.94</b> | -0.036  | 0.009 | < <b>0.001</b> | <b>0.96</b> | -0.059 | 0.008 | < <b>0.001</b> | <b>0.94</b> | -0.058 | 0.010 | < <b>0.001</b> | <b>0.94</b> | -0.052 | 0.004 | < <b>0.001</b> | <b>0.95</b> |
| <b>Injecting drug use†</b>                    | 0.022  | 0.204 | 0.913          | 1.02        | -0.092  | 0.207 | 0.657          | 0.91        | -0.180 | 0.199 | 0.369          | 0.84        | 0.500  | 0.236 | <b>0.036</b>   | <b>1.65</b> | -0.003 | 0.128 | 0.979          | 1.00        |
| <b>Blood transfusion†</b>                     | 0.417  | 0.273 | 0.129          | 1.52        | 0.284   | 0.279 | 0.311          | 1.33        | 0.551  | 0.263 | <b>0.038</b>   | 1.73        | 0.188  | 0.321 | 0.559          | 1.21        | 0.362  | 0.169 | <b>0.034</b>   | <b>1.44</b> |
| <b>Elevated ALT†</b>                          | 0.852  | 0.272 | <b>0.002</b>   | <b>2.34</b> | 0.074   | 0.297 | 0.805          | 1.08        | -0.058 | 0.305 | 0.851          | 0.94        | 0.332  | 0.369 | 0.370          | 1.39        | 0.476  | 0.199 | <b>0.018</b>   | <b>1.61</b> |
| <b>Excess alcohol use†</b>                    | -0.644 | 0.267 | <b>0.017</b>   | <b>0.53</b> | 0.432   | 0.273 | 0.117          | 1.54        | -0.035 | 0.261 | 0.893          | 0.97        | 0.275  | 0.305 | 0.368          | 1.32        | -0.066 | 0.165 | 0.687          | 0.94        |
| <b>HIV positive†</b>                          | -0.192 | 0.809 | 0.813          | 0.83        | 0.116   | 0.815 | 0.888          | 1.12        | -0.365 | 0.770 | 0.636          | 0.69        | 1.052  | 0.909 | 0.249          | 2.86        | -0.069 | 0.486 | 0.888          | 0.93        |
| <b>Genotype-1†</b>                            | -0.080 | 0.214 | 0.708          | 0.92        | -0.358  | 0.215 | 0.099          | 0.70        | -0.626 | 0.199 | <b>0.002</b>   | <b>0.53</b> | -0.935 | 0.236 | < <b>0.001</b> | <b>0.39</b> | -0.317 | 0.129 | <b>0.015</b>   | <b>0.73</b> |
| <b>Genotype-3†</b>                            | 0.378  | 0.300 | 0.210          | 1.46        | 0.259   | 0.307 | 0.401          | 1.29        | 0.376  | 0.290 | 0.198          | 1.46        | 0.962  | 0.337 | <b>0.005</b>   | <b>2.62</b> | 0.367  | 0.184 | <b>0.048</b>   | <b>1.44</b> |
| <b>White†</b>                                 | 0.019  | 0.197 | 0.925          | 1.02        | 0.0004  | 0.201 | 0.998          | 1.00        | -0.188 | 0.192 | 0.330          | 0.83        | 0.147  | 0.230 | 0.523          | 1.16        | -0.013 | 0.124 | 0.918          | 0.99        |
| <b>Black†</b>                                 | -0.440 | 0.308 | 0.155          | 0.64        | -0.166  | 0.316 | 0.601          | 0.85        | -0.485 | 0.298 | 0.105          | 0.62        | -0.759 | 0.357 | <b>0.035</b>   | <b>0.47</b> | -0.374 | 0.189 | <b>0.050</b>   | <b>0.69</b> |
| <b>Asian†</b>                                 | -0.569 | 0.409 | 0.166          | 0.57        | -0.196  | 0.421 | 0.643          | 0.82        | -0.375 | 0.404 | 0.355          | 0.69        | 0.067  | 0.464 | 0.885          | 1.07        | -0.321 | 0.254 | 0.209          | 0.73        |

Supplementary Table 9. Linear mixed model-maximum likelihood method. \*Natural Log-transformed progression rates. Missing were imputed using mean values. †Proportion. Values in bold indicate statistical significance. Abbreviations: scFPR: stage-constant annual fibrosis progression rate (assuming constant progression over F0 to F4); β: coefficient; SE: standard error; HCV: hepatitis C virus; HIV: human immunodeficiency virus; RNA: ribonucleic acid; CHC: chronic hepatitis.

## Supplementary Materials

## Database search strategy and search strings

## 1. MEDLINE

**Databases searched:** Ovid MEDLINE: Epub Ahead of Print, In-Process & Other Non-Indexed Citations, Ovid MEDLINE® Daily and Ovid MEDLINE® 1946-Present

**Search date:** Jan 02, 2018

**Limits:** 2007 -Current

**Filters:** BMJ Clinical Evidence - MEDLINE cohort and case-control filter [undated] [Ovid] from website <http://www.york.ac.uk/inst/crd/intertasc/observational.htm>

## Search Strategy:

| #  | Searches                                                                                                                            |
|----|-------------------------------------------------------------------------------------------------------------------------------------|
| 1  | exp cohort studies/                                                                                                                 |
| 2  | cohort\$.tw.                                                                                                                        |
| 3  | controlled clinical trial.pt.                                                                                                       |
| 4  | epidemiologic methods/                                                                                                              |
| 5  | limit 4 to yr=1966-1989                                                                                                             |
| 6  | exp case-control studies/                                                                                                           |
| 7  | (case\$ and control\$).tw.                                                                                                          |
| 8  | or/1-3,5-7                                                                                                                          |
| 9  | exp hepatitis C/                                                                                                                    |
| 10 | Hepacivirus/                                                                                                                        |
| 11 | ((("parenterally transmitted " or parenterally-transmitted) adj3 ("non a non b hepatitis" or "hepatitis viral non-a non-b")).ti,ab. |
| 12 | ("hepatitis c" adj2 chronic).ti,ab.                                                                                                 |
| 13 | ((("hepatitis C" or "hepatitis c" or "hepatitis c-like" or "hepatitis c like") adj3 virus\$).ti,ab.                                 |
| 14 | (virus\$ or hepacivirus\$ or HCV or "hepatitis c" or "pt-nanbh").ti,ab.                                                             |
| 15 | or/9-14                                                                                                                             |
| 16 | exp disease progression/                                                                                                            |
| 17 | ((progression? or exacerbation) adj2 disease).ti,ab.                                                                                |
| 18 | fibrosis/                                                                                                                           |
| 19 | Liver Cirrhosis/                                                                                                                    |
| 20 | (fibros\$ or cirrhosis).ti,ab.                                                                                                      |
| 21 | ((fibros\$ or cirrhosis) adj2 (liver or hepatic)).ti,ab.                                                                            |
| 22 | or/16-21                                                                                                                            |
| 23 | Prognosis/                                                                                                                          |
| 24 | prognos\$.ti,ab.                                                                                                                    |
| 25 | disease-free survival/                                                                                                              |
| 26 | (survival? adj3 ("disease-free" or "disease freeor progression-free" or "progression free" or "event-free" or "event free")).ti,ab. |
| 27 | medical futility/                                                                                                                   |
| 28 | (futil\$ adj2 (treatment? or medical)).ti,ab.                                                                                       |
| 29 | treatment outcome/                                                                                                                  |
| 30 | (treatment adj2 (efficacy or effectiveness or outcome)).ti,ab.                                                                      |
| 31 | (outcome adj2 rehabilitation).ti,ab.                                                                                                |
| 32 | treatment failure/                                                                                                                  |
| 33 | (treatment adj2 failure?).ti,ab.                                                                                                    |
| 34 | morbidity/                                                                                                                          |
| 35 | morbidity\$.ti,ab.                                                                                                                  |
| 36 | mortality/                                                                                                                          |
| 37 | (mortality\$ or death rate?).ti,ab.                                                                                                 |
| 38 | (mortality\$ adj3 (decline? or determinant? or differential or excess)).ti,ab.                                                      |
| 39 | ("death rate?" adj3 ("age-specific" or "age specific")).ti,ab.                                                                      |
| 40 | ((death or "case fatality") adj2 rate?).ti,ab.                                                                                      |
| 41 | fatal outcome/                                                                                                                      |
| 42 | (outcome? adj2 fatal).ti,ab.                                                                                                        |



## Supplementary Materials

|    |                                                                                                                 |
|----|-----------------------------------------------------------------------------------------------------------------|
| 43 | hospital mortality/                                                                                             |
| 44 | (mortalit\$ adj3 (hospital or "in-hospital" or inhospital or "in hospital" or "in-house" or "in house")).ti,ab. |
| 45 | survival rate/                                                                                                  |
| 46 | (rate adj3 survival adj3 (mean or rate or cumulative)).ti,ab.                                                   |
| 47 | (survivorship or (survival adj2 (rates or "times mean"))).ti,ab.                                                |
| 48 | or/23-47                                                                                                        |
| 49 | 8 and 15 and 22 and 48                                                                                          |

## 2. EMBASE

**Databases searched:** Embase Classic+Embase 1947 to 2017 December 29

**Search date:** January 02, 2018

**Limits:** 2007-Current

**Filters:** BMJ Clinical Evidence - EMBASE cohort and case-control filter [undated] [Ovid] from website <http://www.york.ac.uk/inst/crd/intertasc/observational.htm>

### Search Strategy:

| #  | Searches                                                                                                                            |
|----|-------------------------------------------------------------------------------------------------------------------------------------|
| 1  | exp hepatitis C/                                                                                                                    |
| 2  | exp hepatitis C virus/                                                                                                              |
| 3  | ((("parenterally transmitted " or parenterally-transmitted) adj3 ("non a non b hepatitis" or "hepatitis viral non-a non-b")).ti,ab. |
| 4  | ("hepatitis c" adj2 chronic).ti,ab.                                                                                                 |
| 5  | ((("hepatitis C" or "hepatitis c" or "hepatitis c-like" or "hepatitis c like") adj3 virus\$).ti,ab.                                 |
| 6  | (hepacivirus\$ or HCV or "hepatitis c" or "pt-nanbh").ti,ab.                                                                        |
| 7  | or/1-6                                                                                                                              |
| 8  | exp disease course/                                                                                                                 |
| 9  | ((progression? or exacerbation) adj2 disease).ti,ab.                                                                                |
| 10 | liver fibrosis/                                                                                                                     |
| 11 | fibrosis.ti,ab.                                                                                                                     |
| 12 | liver cirrhosis/                                                                                                                    |
| 13 | (fibros\$ or cirrhosis).ti,ab.                                                                                                      |
| 14 | ((fibros\$ or cirrhosis) adj2 (liver or hepatic)).ti,ab.                                                                            |
| 15 | or/8-14                                                                                                                             |
| 16 | prognosis/                                                                                                                          |
| 17 | prognos\$.mp.                                                                                                                       |
| 18 | disease-free survival/                                                                                                              |
| 19 | (survival? adj3 ("disease-free" or "disease freeor progression-free" or "progression free" or "event-free" or "event free")).ti,ab. |
| 20 | (futil\$ adj2 (treatment? or medical)).ti,ab.                                                                                       |
| 21 | treatment outcome/                                                                                                                  |
| 22 | (treatment adj2 (efficacy or effectiveness or outcome)).ti,ab.                                                                      |
| 23 | (outcome adj2 rehabilitation).ti,ab.                                                                                                |
| 24 | treatment failure/                                                                                                                  |
| 25 | (treatment adj2 failure?).ti,ab.                                                                                                    |
| 26 | morbidity/                                                                                                                          |
| 27 | morbidity\$.ti,ab.                                                                                                                  |
| 28 | mortality/                                                                                                                          |
| 29 | (mortalit\$ or death rate?).ti,ab.                                                                                                  |
| 30 | (mortalit\$ adj3 (decline? or determinant? or differential or excess)).ti,ab.                                                       |
| 31 | (death rate? adj3 ("age-specific" or "age specific")).ti,ab.                                                                        |
| 32 | fatality/                                                                                                                           |
| 33 | (outcome? adj2 fatal).ti,ab.                                                                                                        |
| 34 | (mortalit\$ adj3 (hospital or "in-hospital" or inhospital or "in hospital" or "in-house" or "in house")).ti,ab.                     |
| 35 | survival rate/                                                                                                                      |
| 36 | (rate adj3 survival adj3 (mean or rate or cumulative)).ti,ab.                                                                       |
| 37 | (survivorship or (survival adj2 (rates or "times mean"))).ti,ab.                                                                    |

## Supplementary Materials

|    |                            |
|----|----------------------------|
| 38 | or/16-37                   |
| 39 | exp cohort analysis/       |
| 40 | exp longitudinal study/    |
| 41 | exp prospective study/     |
| 42 | exp follow up/             |
| 43 | cohort\$.tw.               |
| 44 | exp case control study/    |
| 45 | (case\$ and control\$).tw. |
| 46 | or/39-45                   |
| 47 | 7 and 15 and 38 and 46     |

## PUBMED

## Databases searched: PubMed

**Limits:** Publication date from 2007/01/01 to 2018/01/02

**Filters:** BMJ Clinical Evidence - EMBASE cohort and case-control filter [undated] [Ovid translated into PubMed] from website <http://www.york.ac.uk/inst/crd/intertasc/observational.htm>

## Search Strategy:

((cohort studies[mesh]) OR (cohort\$[Title]) OR (epidemiologic methods[mesh:noexp]) OR (case-control studies[mesh]) OR ((case\$ AND control\$) AND Title) OR (limit AND (epidemiologic methods[mesh:noexp]) AND to yr=1966-1989)) AND ((hepatitis C[mesh]) OR (Hepacivirus[mesh:noexp]) OR (((("parenterally transmitted"[tiab] OR parenterally-transmitted[tiab]) AND ("non a non b hepatitis"[tiab] OR "hepatitis viral non-a non-b"[tiab]))) OR ((("hepatitis c"[tiab] AND chronic[tiab]) OR ((("hepatitis C"[tiab] OR "hepatitis c"[tiab] OR "hepatitis c-like"[tiab] OR "hepatitis c like"[tiab]) AND virus\$[tiab])) OR ((virus\$[tiab] OR hepacivirus\$[tiab] OR HCV[tiab] OR "hepatitis c"[tiab] OR "pt-nanbh"[tiab]))) AND ((disease progression[mesh]) OR (((progression\*[tiab] OR exacerbation[tiab]) AND disease[tiab])) OR (fibrosis[mesh:noexp]) OR (Liver Cirrhosis[mesh:noexp]) OR ((fibros\$[tiab] OR cirrhosis[tiab])) OR (((fibros\$[tiab] OR cirrhosis[tiab]) AND (liver[tiab] OR hepatic[tiab]))) AND ((Prognosis[mesh:noexp]) OR (prognos\$[tiab]) OR (disease-free survival[mesh:noexp]) OR ((survival\*[tiab] AND ("disease-free"[tiab] OR "disease free"[tiab] OR "progression-free"[tiab] OR "progression free"[tiab] OR "event-free"[tiab] OR "event free"[tiab]))) OR (medical futility[mesh:noexp]) OR ((futil\$[tiab] AND (treatment\*[tiab] OR medical[tiab]))) OR (treatment outcome[mesh:noexp]) OR ((treatment[tiab] AND (efficacy[tiab] OR effectiveness[tiab] OR outcome[tiab]))) OR ((outcome[tiab] AND rehabilitation[tiab])) OR (treatment failure[mesh:noexp]) OR ((treatment[tiab] AND failure\*[tiab])) OR (morbidity[mesh:noexp]) OR (morbidity\$[tiab]) OR (mortality[mesh:noexp]) OR ((mortalit\$[tiab] OR death rate\*[tiab])) OR ((mortalit\$[tiab] AND (decline\*[tiab] OR determinant\*[tiab] OR differential[tiab] OR excess[tiab]))) OR ((("death rate"\*[tiab] AND ("age-specific"[tiab] OR "age specific"[tiab]))) OR (((death[tiab] OR "case fatality"[tiab]) AND rate\*[tiab])) OR (fatal outcome[mesh:noexp]) OR ((outcome\*[tiab] AND fatal[tiab])) OR (hospital mortality[mesh:noexp]) OR ((mortalit\$[tiab] AND (hospital[tiab] OR "in-hospital"[tiab] OR inhospital[tiab] OR "in hospital"[tiab] OR "in-house"[tiab] OR "in house"[tiab]))) OR (survival rate[mesh:noexp]) OR ((rate[tiab] AND survival[tiab] AND (mean[tiab] OR rate[tiab] OR cumulative[tiab]))) OR ((survivorship[tiab] OR (survival[tiab] AND (rates[tiab] OR "times mean"[tiab])))

## Supplementary Materials

### List of extracted data items

Previously identified data items were abstracted in duplicate by two independent reviewers using piloted abstraction sheets in excel. Study authors were not contacted to obtain missing data. For non-English studies, native speakers were contacted for help with full-text review and data extraction process. Abstract were not included in the current analysis as these records do not report information necessary for estimating prognosis (i.e. duration of infection).

#### 1. Study related factors:

- Study design (i.e. cross-sectional/retrospective, retrospective-prospective, prospective)
- Study setting (i.e. clinical, non-clinical)
- Study population (i.e. blood donor, female cohort, dialysis patient, IDUs, community, pediatric, post-transfusion, renal transplant recipients)
- Sample size
- Country

#### 2. Host-related factors:

- Gender (n, % male)
- Mean age at assessment of liver disease (years)
- Mean age at HCV acquisition [where unavailable, data were calculated by taking the difference between mean age at assessment of liver disease and the mean duration of HCV infection] (years)
- Mean estimated duration of HCV infection (years)
- Mode of HCV acquisition (n, %: IDU, blood transfusion, sporadic)
- Excess alcohol consumption [as defined in study] (n, %)
- Mean body mass index (BMI) (kg/m<sup>2</sup>)
- History of diabetes mellitus (n, %)
- Coinfection with HBV (n, % HBsAg positive)
- Coinfection with HIV (n, %)

#### 3. Virus related factors:

- HCV genotype (n, %: G1, G2, G3, G4, other)
- HCV RNA positivity (n, %)
- HCV RNA viral load (IU/ml)

#### 4. Liver-related factors

- Elevated ALT levels (n, %)
- Mean ALT (IU/L)
- Presence of hepatic steatosis (n, %)
- Method of fibrosis assessment (e.g. LB, TE, combination LB and non-invasive)
- Method of fibrosis scoring (e.g. METAIR, Ishak, or cutoffs for non-invasive tests)
- Fibrosis stage distributions at latest available follow-up point (n, %: F0 to F4) [where data were reported as composite (i.e., F0/F1) a 50:50 distributions was applied to the 2 stages. Stage distribution was not performed if more than two stages were reported in composite]
- Liver biopsy length (mm)
- Clinical or histological diagnosis of cirrhosis (n. %)
- Mean histological activity index (HAI) Inflammatory score

**Note on missing data:** Age at infection, for studies that did not report this, was imputed by taking the difference between age at assessment and the duration of infection. For studies that report composite fibrosis stages (e.g., F0/F1), data were distributed 50:50 across F0 and F1. Stage distribution was not performed when more than two stages were reported collectively (e.g., F0/F1/F2).

## Supplementary Materials

### Supplemental References

- 1 Boonwaat L, Haber PS, Levy MH, *et al.* Establishment of a successful assessment and treatment service for Australian prison inmates with chronic hepatitis C. *Med J Aust* 2010;**192**:496–500.
- 2 Contreras AM, Ruiz I, Polanco-Cruz G, *et al.* End-stage renal disease and hepatitis C infection: comparison of alanine aminotransferase levels and liver histology in patients with and without renal damage. *Ann. Hepatol.* 2007;**6**:48–54.
- 3 Brescini L, Orsetti E, Gesuita R, *et al.* Evaluating Liver Fibrosis by Transient Elastometry in Patients With HIV-HCV Coinfection and Mono-infection. *Hepat Mon* 2014;**14**:e15426. doi:<http://dx.doi.org/10.5812/hepatmon.15426>
- 4 De Lédighen V, Barreiro P, Foucher J, *et al.* Liver fibrosis on account of chronic hepatitis C is more severe in HIV-positive than HIV-negative patients despite antiretroviral therapy. *J Viral Hepat* 2008;**15**:427–33. doi:10.1111/j.1365-2893.2007.00962.x
- 5 Nunnari G. Circulating fibrocytes as a marker of liver fibrosis in chronic hepatitis C. *Front Biosci* 2010;**E2**:1241. doi:10.2741/E184
- 6 Mazzocato S, Orsetti E, Gesuita R, *et al.* Comparison of liver fibrosis progression in HIV / HCV co-infected and HCV mono-infected patients by transient elastometry. 2014;**39**:797–802. doi:10.3109/00365548.2014.952245
- 7 Suárez-Zarracina T, Valle-Garay E, Collazos J, *et al.* Didanosine (ddI) associates with increased liver fibrosis in adult HIV-HCV coinfecting patients. *J Viral Hepat* 2012;**19**:685–93. doi:10.1111/j.1365-2893.2012.01596.x
- 8 Liu S, Cheng M, Mu M, *et al.* [Natural clearance of hepatitis C virus in 96 patients with infection acquired by blood transfusion from a single donor in Guizhou]. *Zhonghua Gan Zang Bing Za Zhi* 2014;**22**:251–4. doi:10.3760/cma.j.issn.1007-3418.2014.04.003
- 9 Valva P, Gismondi MI, Casciato PC, *et al.* Distinctive intrahepatic characteristics of paediatric and adult pathogenesis of chronic hepatitis C infection. *Clin Microbiol Infect* 2014;**20**:O998–1009. doi:10.1111/1469-0691.12728
- 10 Delgado-Borrego A, Healey D, Negre B, *et al.* Influence of body mass index on outcome of pediatric chronic hepatitis C virus infection. *J Pediatr Gastroenterol Nutr* 2010;**51**:191–7. doi:10.1097/MPG.0b013e3181d32756 10.1097/MPG.0b013e3181d32756
- 11 Hui C-K, Zhang H-Y, Shek T, *et al.* Disease progression in Chinese chronic hepatitis C patients with persistently normal alanine aminotransferase levels. *Aliment. Pharmacol. Ther.* 2007;**25**:1283–92.
- 12 Liu T, Howell GT, Turner L, *et al.* Marijuana use in hepatitis C infection does not affect liver biopsy histology or treatment outcomes. *Can J Gastroenterol Hepatol* 2014;**28**:381–4.
- 13 Nanda KS, Brady JJ, Murray BF, *et al.* Elevated circulating osteoprotegerin and reduced matrix-metalloproteinase-9 in post-menopausal women with chronic Hepatitis C virus infection. *Cytokine.* 2012;**60**:328–33.
- 14 Siddiqui FA, Ehrinpreis MN, Janisse J, *et al.* Demographics of a large cohort of urban chronic hepatitis C patients. *Hepatol. Int.* 2008;**2**:376–81.
- 15 Hissar SS, Kumar M, Tyagi P, *et al.* Natural history of hepatic fibrosis progression in chronic hepatitis C virus infection in India. *J Gastroenterol Hepatol* 2009;**24**:581–7. doi:10.1111/j.1440-1746.2008.05649.x
- 16 Kallwitz ER, Layden-Almer J, Dhamija M, *et al.* Ethnicity and body mass index are associated with hepatitis C presentation and progression. *Clin Gastroenterol Hepatol* 2010;**8**:72–8. doi:10.1016/j.cgh.2009.08.009

### Supplementary Materials

- 17 Larsen C, Bousquet V, Delarocque-Astagneau E, *et al.* Hepatitis C virus genotype 3 and the risk of severe liver disease in a large population of drug users in France. *J Med Virol* 2010;**82**:1647–54. doi:10.1002/jmv.21850
- 18 Agostini H, Castera L, Melin P, *et al.* HEPACOM: multicenter, observational prospective study of outcome and monitoring of HCV positive antiviral-naïve patients managed in the French health care system. *Gastroenterol. Clin. Biol.* 2007;**31**:1074–80.
- 19 Allison RD, Conry-Cantilena C, Koziol D, *et al.* A 25-year study of the clinical and histologic outcomes of hepatitis C virus infection and its modes of transmission in a cohort of initially asymptomatic blood donors. *J. Infect. Dis.* 2012;**206**:654–61.
- 20 Marabita F, Aghemo A, De Nicola S, *et al.* Genetic variation in the interleukin-28B gene is not associated with fibrosis progression in patients with chronic hepatitis C and known date of infection. *Hepatology* 2011;**54**:1127–34. doi:10.1002/hep.24503
- 21 White DL, Tavakoli-Tabasi S, Kuzniarek J, *et al.* Higher serum testosterone is associated with increased risk of advanced hepatitis C-related liver disease in males. *Hepatology* 2012;**55**:759–68. doi:10.1002/hep.24618
- 22 Reggiardo MV, Fay F, Tanno M, *et al.* Natural history of hepatitis C virus infection in a cohort of asymptomatic post-transfused subjects. *Ann Hepatol*;11:658–66.
- 23 Terrault NA, Im K, Boylan R, *et al.* Fibrosis progression in African Americans and Caucasian Americans with chronic hepatitis C. *Clin Gastroenterol Hepatol* 2008;**6**:1403–11. doi:10.1016/j.cgh.2008.08.006
- 24 Guyader D, Thirouard A-S, Erdtmann L, *et al.* Liver iron is a surrogate marker of severe fibrosis in chronic hepatitis C. *J Hepatol* 2007;**46**:587–95. doi:10.1016/j.jhep.2006.09.021
- 25 Pradat P, Voirin N, Tillmann HL, *et al.* Progression to cirrhosis in hepatitis C patients: An age-dependent process. *Liver Int* 2007;**27**:335–9. doi:10.1111/j.1478-3231.2006.01430.x
- 26 Castéra L, Hézode C, Roudot-Thoraval F, *et al.* Effect of antiviral treatment on evolution of liver steatosis in patients with chronic hepatitis C: indirect evidence of a role of hepatitis C virus genotype 3 in steatosis. *Gut* 2004;**53**:420–4.
- 27 Mathurin P. Slow progression rate of fibrosis in hepatitis C virus patients with persistently normal alanine transaminase activity. *Hepatology* 1998;**27**:868–72. doi:10.1002/hep.510270333
- 28 Cepeda JA, Thomas DL, Astemborski J, *et al.* Liver disease progression in a community-based sample of HCV-infected PWID. *Top Antivir Med* 2016;**24 (E-1)**:218.
- 29 Cepeda JA, Thomas DL, Astemborski J, *et al.* Increased mortality among persons with chronic hepatitis C with moderate or severe liver disease: a cohort study. *Clin Infect Dis* 2017;**10**:10. doi:https://dx.doi.org/10.1093/cid/cix207
- 30 Bourliere M, Ouzan D, Rosenheim M, *et al.* Pegylated interferon-alpha2a plus ribavirin for chronic hepatitis C in a real-life setting: the Hepatys French cohort (2003-2007). *Antivir Ther* 2012;**17**:101–10. doi:http://dx.doi.org/10.3851/IMP1935
- 31 Lemos LB, Perez RM, Lemos MM, *et al.* Hepatitis C in chronic kidney disease: Predialysis patients present more severe histological liver injury than hemodialysis patients? *Am J Nephrol* 2007;**27**:191–6. doi:10.1159/000100892
- 32 Delladetsima I, Psychogiou M, Sypsa V, *et al.* Time of acquisition of HCV infection in renal transplant recipients: a major prognostic factor for disease progression. *Clin Transpl* 2013;**27**:72–9. doi:10.1111/ctr.12012
- 33 Besheer T, El-Bendary M, Elalfy H, *et al.* Prediction of Fibrosis Progression Rate in Patients with Chronic Hepatitis C Genotype 4: Role of Cirrhosis Risk Score and Host Factors. *J Interf Cytokine Res*

### Supplementary Materials

- 2017;**37**:97–102. doi:10.1089/jir.2016.0111
- 34 Sakellariou S, Boletis JN, Sypsa V, *et al.* Histological features of chronic hepatitis C in haemodialysis patients. *Liver Int* 2014;**34**:e56–61. doi:https://dx.doi.org/10.1111/liv.12413
- 35 Forestier N, Gaus A, Herrmann E, *et al.* Acoustic radiation force impulse imaging for evaluation of antiviral treatment response in chronic hepatitis C. *J Gastrointest Liver Dis* 2012;**21**:367–73.
- 36 Goodman ZD, Makhlof HR, Liu L, *et al.* Pathology of chronic hepatitis C in children: liver biopsy findings in the Peds-C Trial. *Hepatology* 2008;**47**:836–43. doi:10.1002/hep.22094
- 37 Rao H-Y, Sun D-G, Yang R-F, *et al.* Outcome of hepatitis C virus infection in Chinese paid plasma donors: a 12-19-year cohort study. *J Gastroenterol Hepatol.* 2012;**27**:526–32.
- 38 Werner T, Aqel B, Balan V, *et al.* Treatment of hepatitis C in renal transplantation candidates: a single-center experience. *Transplantation.* 2010;**90**:407–11.
- 39 Bochud P-Y, Cai T, Overbeck K, *et al.* Genotype 3 is associated with accelerated fibrosis progression in chronic hepatitis C. *J Hepatol* 2009;**51**:655–66. doi:10.1016/j.jhep.2009.05.016
- 40 Kielland KB, Delaveris GJ, Rogde S, *et al.* Liver fibrosis progression at autopsy in injecting drug users infected by hepatitis C: a longitudinal long-term cohort study. *J Hepatol* 2014;**60**:260–6. doi:10.1016/j.jhep.2013.09.022
- 41 Lawson A, Trent Hepatitis CSG. Hepatitis C virus-infected patients with a persistently normal alanine aminotransferase: do they exist and is this really a group with mild disease? *J Viral Hepat* 2010;**17**:51–8. doi:10.1111/j.1365-2893.2009.01148.x
- 42 Patin E, Kutalik Z, Guernon J, *et al.* Genome-wide association study identifies variants associated with progression of liver fibrosis from HCV infection. *Gastroenterology* 2012;**143**:1212–44. doi:10.1053/j.gastro.2012.07.097
- 43 Midgard H, Hajarizadeh B, Cunningham EB, *et al.* Changes in risk behaviours during and following treatment for hepatitis C virus infection among people who inject drugs: The ACTIVATE study. *Int J Drug Policy* 2017;**47**:230–8. doi:10.1016/j.drugpo.2017.05.040
- 44 Chen Yi Mei SLG, Thompson AJ, Christensen B, *et al.* Sustained virological response halts fibrosis progression : A long-term follow-up study of people with chronic hepatitis C infection. *PLoS ONE* 12(10) 2017;**12**:1–12.
- 45 Bruden DJ, McMahon BJ, Townshend-Bulson L, *et al.* Risk of End Stage Liver Disease, Hepatocellular Carcinoma and Liver-Related Death By Fibrosis Stage in the Hepatitis C Alaska Cohort. *Hepatology* Published Online First: 2017. doi:10.1002/hep.29115
- 46 Castéra L, Vergniol J, Foucher J, *et al.* Prospective comparison of transient elastography, Fibrotest, APRI, and liver biopsy for the assessment of fibrosis in chronic hepatitis C. *Gastroenterology* 2005;**128**:343–50. doi:10.1053/j.gastro.2004.11.018
- 47 Delgado-Borrego A, Jordan SH, Negre B, *et al.* Reduction of Insulin Resistance With Effective Clearance of Hepatitis C Infection: Results From the HALT-C Trial. *Clin Gastroenterol Hepatol* 2010;**8**:458–62.
